# Supplementary material for: Public Interest and Accessibility of Telehealth in Japan: Retrospective Analysis Using Google Trends and National Surveillance
Source: PubMed Central journal article supplement (PMC9520390; doi:10.2196/36525), 2022-09-14
Supplement: formative_v6i9e36525_app3.pdf [file formative_v6i9e36525_app3.pdf]

電話や情報通信機器を用いて診療を実施する医療機関の一覧（東京都）

|   | 基本情報                  |          |                                            |              |                                              | 事務連絡に基づく対応について     |                    |                                    |                                                            |                                                                                                                                              |
|---|-----------------------|----------|--------------------------------------------|--------------|----------------------------------------------|--------------------|--------------------|------------------------------------|------------------------------------------------------------|----------------------------------------------------------------------------------------------------------------------------------------------|
|   | 施設名                   | 郵便番号     | 住所（都道府県から記載）                               | 電話番号         | ウェブサイトURL                                    | 初診の電話等を用いた診療の実施の有無 | 再診の電話等を用いた診療の実施の有無 | 対応診療科                              | 担当医師名                                                      | 対面診療が必要と判断した場合に連携する医療機関名（複数ある場合は複数、住所も併せて記載）                                                                                                 |
| 1 | 秋葉原あつたアレルギー呼吸器内科クリニック | 101-0033 | 東京都千代田区神田岩本町1番地5<br>清水ビル6階                 | 03-3253-4159 | https://atsuta-clinic.jp                     |                    | ○                  | 呼吸器内科／アレルギー科／内科                    | 熱田 了                                                       | 三井記念病院（東京都千代田区神田和泉町1）<br>日本大学病院（東京都千代田区神田駿河台1-6）<br>杏雲堂病院（東京都千代田区神田駿河台1-8）<br>東京医科歯科大学医学部附属病院（東京都文京区湯島1-5-45）<br>順天堂大学医学部附属病院（東京都文京区本郷2-1-1） |
| 2 | 秋葉原スキンクリニック           | 101-0021 | 東京都千代田区外神田四丁目6番7号<br>カンダエイトビル2階 3階         | 03-3256-1212 | https://www.akihabara-skin.com/              |                    | ○                  | 皮膚科                                | 堀内 祐紀／矢田 佳子／明石 玲／関 詠姿／西山 有希子／向久保 寿恵／吉田 珠英／上松 ふみ／吉田 暁子／川上 倫 | 左記施設                                                                                                                                         |
| 3 | 秋葉原DEM内科クリニック         | 101-0025 | 東京都千代田区神田佐久間町三丁目28番地<br>星野ビル2階             | 03-5846-9876 | www.akibademclinic.jp                        |                    | ○                  | 内科／糖尿病内<br>分泌内科／代謝<br>内科           | 内村 功／諸星 政治                                                 | 左記施設<br>東京医科歯科大学医学部附属病院（東京都文京区湯島1-5-45）<br>三井記念病院（東京都千代田区神田和泉町1）<br>三楽病院（東京都千代田区神田駿河台2-5）                                                    |
| 4 | 秋葉原メンタルクリニック          | 101-0027 | 東京都千代田区神田平河町4番地<br>渡辺ビル6階                  | 03-5833-6852 | https://www.akihabara-mental-clinic2019.com/ |                    | ○                  | 精神科                                | 安藤 智道                                                      | 左記施設                                                                                                                                         |
| 5 | 浅井医院                  | 102-0083 | 東京都千代田区麹町三丁目7番地24<br>東急ドエルグラフィオ麹町101       | 03-3261-0453 | www.asai-iin.com                             |                    | ○                  | 皮膚科／内科／外科                          | 戸田 素子                                                      | 東京通信病院（東京都千代田区富士見2-14-23）                                                                                                                    |
| 6 | あたまと体のヘルスケアクリニック神田    | 101-0041 | 東京都千代田区神田須田町一丁目10番地42<br>エスペランサ神田須田町2階     | 03-3254-0056 | http://atamato-karada.com                    | ○                  | ○                  | 脳神経外科／内<br>分泌内科                    | 池田 秀敏                                                      | 総合南東北病院（福島県郡山市八山田7-115）                                                                                                                      |
| 7 | アルツクリニック東京            | 100-0005 | 東京都千代田区丸の内一丁目7番12号<br>サビアタワー7階             | 03-3212-0003 |                                              |                    | ○                  | メンタルクリ<br>ニック（精神<br>科）／内科／神<br>経内科 | 新井 平伊／出<br>雲 博子                                            |                                                                                                                                              |
| 8 | 淡路町眼科                 | 101-0041 | 東京都千代田区神田須田町1-2-7 淡路町駅前ビル2F                | 03-3526-6086 | https://www.awajichoganka.com/               |                    | ○                  | 眼科                                 | 由井 あかり                                                     |                                                                                                                                              |
| 9 | 飯田橋駅前さくら坂クリニック        | 102-0071 | 東京都千代田区富士見二丁目10番2号<br>飯田橋グラン・ブルーム サクラテラス3階 | 03-3239-1112 | https://iidabashi-hifuka.com                 |                    | ○                  | 皮膚科                                | 小谷 和弘                                                      |                                                                                                                                              |

電話や情報通信機器を用いて診療を実施する医療機関の一覧（東京都）

|    | 基本情報                           |          |                                       |                     |                                        | 事務連絡に基づく対応について     |                    |                                                           |                                                                                 |                                                                           |
|----|--------------------------------|----------|---------------------------------------|---------------------|----------------------------------------|--------------------|--------------------|-----------------------------------------------------------|---------------------------------------------------------------------------------|---------------------------------------------------------------------------|
|    | 施設名                            | 郵便番号     | 住所（都道府県から記載）                          | 電話番号                | ウェブサイトURL                              | 初診の電話等を用いた診療の実施の有無 | 再診の電話等を用いた診療の実施の有無 | 対応診療科                                                     | 担当医師名                                                                           | 対面診療が必要と判断した場合に連携する医療機関名（複数ある場合は複数、住所も併せて記載）                              |
| 10 | 飯田橋東口内科心療内科診療所                 | 102-0072 | 東京都千代田区飯田橋四丁目9番9号<br>第7田中ビル8階         | 03-6260-9863        | http://www.iidabashi-shinryounaika.jp  |                    | ○                  | 内科/心療内科                                                   | 下平 智史                                                                           | 東京通信病院（東京都千代田区富士見2-14-23）<br>三井記念病院三井記念病院（東京都千代田区神田和泉町1）<br>東京新宿メディカルセンター |
| 11 | 飯田橋皮膚科スキンクリニック                 | 102-0072 | 東京都千代田区飯田橋飯田橋四丁目2番2号<br>宮下ビル1F        | 03-3234-0140        | https://iskc.jp                        |                    | ○                  | 皮膚科                                                       | 河野 志穂美                                                                          |                                                                           |
| 12 | 飯田橋レディースクリニック                  | 102-0072 | 東京都千代田区飯田橋三丁目10番10号<br>ガーデンエアータワー2階   | 03-3556-8333        | http://www.iidabashi-ladies-clinic.com |                    | ○                  | 産婦人科                                                      | 岡野 浩哉                                                                           |                                                                           |
| 13 | 市ヶ谷駅前診療所                       | 102-0076 | 東京都千代田区五番町2<br>横山ビル1階                 | 03-3234-5021        | https://ichigaya-shinryosyo.com/       | ○                  | ○                  | 内科/皮膚科                                                    | 泉田 秀輝                                                                           | 東京通信病院（東京都千代田区富士見2-14-23）                                                 |
| 14 | 一般財団法人健康医学協会附属霞が関ビル診療所         | 100-6003 | 東京都千代田区霞が関霞が関三丁目2番5号<br>霞が関ビル3階       | 03-3581-6031        |                                        |                    | ○                  | 内科                                                        | 鈴木 順一/今井 道代/二宮 栄司/田辺 紀子                                                         | 虎の門病院                                                                     |
| 15 | 一般財団法人健康医学協会附属東都クリニック          | 102-0094 | 東京都千代田区紀尾井町4-1<br>ホテルニューオータニガーデンタワー2階 | 03-3239-0301        | https://www.kenkoigaku.or.jp           |                    | ○                  | 内科/消化器内科/循環器内科/糖尿病内科/呼吸器内科/心療内科/外科/乳腺外科/婦人科/眼科/耳鼻咽喉科/泌尿器科 | 四科九世（院長）/佐原由華子（副院長）<br>【内科】四方千裕/尾仲章男/上野由起子/岡美久子/白鳥敬子/遠藤康夫/泉二登志子/鈴木順一/小西敏郎/勝木美佳子 |                                                                           |
| 16 | 一般財団法人全日本労働福祉協会 九段クリニック        | 102-0073 | 東京都千代田区九段北1-9-5<br>朝日九段マンション1階1号室     | 03-3222-0071        |                                        |                    | ○                  | 内科/婦人科                                                    | 西原 浩憲/上田 医師/木村 緑                                                                |                                                                           |
| 17 | 一般財団法人日本がん知識普及協会付属有楽町電気ビルクリニック | 100-0006 | 東京都千代田区有楽町一丁目7番1号<br>有楽町電気ビル北館10階     | 03-3213-0091<br>(代) |                                        |                    | ○                  | 内科                                                        | 川島 隆二                                                                           |                                                                           |
| 18 | 医療法人財団小畑会浜田病院                  | 101-0062 | 東京都千代田区神田駿河台二丁目5番地                    | 03-5280-1166        | obatakai.or.jp                         |                    | ○                  | 産婦人科/小児科/不妊科/乳腺外科                                         | 小畑 清一郎/知念 香奈/清水 俊明/合阪 幸三/平田 哲也/平池 修/土屋 富士子/小田 美規/原田 美由紀                         |                                                                           |

電話や情報通信機器を用いて診療を実施する医療機関の一覧（東京都）

|    | 基本情報                   |          |                                        |              |                                    | 事務連絡に基づく対応について     |                    |                                                      |                       |                                                                                                             |
|----|------------------------|----------|----------------------------------------|--------------|------------------------------------|--------------------|--------------------|------------------------------------------------------|-----------------------|-------------------------------------------------------------------------------------------------------------|
|    | 施設名                    | 郵便番号     | 住所（都道府県から記載）                           | 電話番号         | ウェブサイトURL                          | 初診の電話等を用いた診療の実施の有無 | 再診の電話等を用いた診療の実施の有無 | 対応診療科                                                | 担当医師名                 | 対面診療が必要と判断した場合に連携する医療機関名（複数ある場合は複数、住所も併せて記載）                                                                |
| 19 | 医療法人財団駿愛会駿河台診療所        | 101-0062 | 東京都千代田区神田駿河台二丁目1番地45<br>ニュー駿河台ビル5階     | 03-3219-1121 | http://www.sunaikai.jp             | ○                  | ○                  | 内科                                                   | 塩澤 宏和                 | 杏雲堂病院（東京都千代田区神田駿河台1-8）<br>三楽病院（東京都千代田区神田駿河台2-5）<br>日本大学病院（東京都千代田区神田駿河台1-6）<br>東海大学医学部附属東京病院（東京都渋谷区代々木1-2-5） |
| 20 | 医療法人財団日睡会御茶ノ水呼吸ケアクリニック | 101-0062 | 東京都千代田区神田駿河台2-8<br>瀬川ビルディング3F          | 03-3292-3838 | https://.sas-care.jp               |                    | ○                  | 呼吸器内科（当院CPAP処方患者の定期受診に限る）                            | 村田 朗                  |                                                                                                             |
| 21 | 医療法人財団福音医療会神田キリスト教診療所  | 101-0053 | 東京都千代田区神田美土代町7番地4<br>東英美土代ビル5階・6階      | 03-3294-0808 | www.fukuin.net                     |                    | ○                  | 内科／消化器内科／循環器内科／泌尿器科／皮膚科                              | 小西 弘一                 |                                                                                                             |
| 22 | 医療法人財団神尾記念病院           | 101-0063 | 東京都千代田区神田淡路町2丁目25番地                    | 03-3253-3351 | http://www.kamio.org/              |                    | ○                  | 耳鼻咽喉科<br>皮膚科                                         | 各主治医                  |                                                                                                             |
| 23 | 医療法人財団医親会海上ビル診療所       | 100-0005 | 東京都千代田区丸の内一丁目2番1号<br>東京海上日動ビルディング新館3階  | 03-3212-7690 | http://www.kbclinic.or.jp/         |                    | ○                  | 内科／消化器内科／循環器内科／整形外科／皮膚科／婦人科／眼科／泌尿器科／呼吸器内科／リウマチ科／代謝内科 | 各担当医師                 |                                                                                                             |
| 24 | 医療法人社団アネモス会荻本医院        | 101-0047 | 東京都千代田区内神田二丁目7番14号<br>山手ビル3号館4F        | 03-3255-4730 | www.ogimoto.com                    |                    | ○                  | 精神科／内科／心療内科                                          | 荻本 芳信                 | その都度、患者と話し合い、ご本人が納得した医療機関に診療情報提供を認め御高診をお願いする                                                                |
| 25 | 医療法人社団お茶会 お茶の水循環器内科    | 101-0051 | 東京都千代田区神田神保町一丁目4番地<br>神保町1-4ビル8階       | 03-5577-6513 | ochanomizunaik.com                 |                    | ○                  | 循環器内科                                                | 五十嵐 健祐                | 左記施設                                                                                                        |
| 26 | 医療法人社団ひのき会証クリニック神田     | 101-0052 | 東京都千代田区神田小川町三丁目8番地<br>中北ビル2階           | 03-3292-7701 | http://www.akashi-clinic.com       |                    | ○                  | 漢方内科／内科<br>漢方消化器内科／漢方精神科                             | 伊藤 隆／岡本英輝／檜山 幸孝／横山 浩一 |                                                                                                             |
| 27 | 医療法人社団益生会神保町代謝クリニック    | 101-0051 | 東京都千代田区神田神保町二丁目9番地1<br>神田神保町メディカルモール5階 | 03-5210-3412 | http://www1.tcn-catv.ne.jp/taisha/ |                    | ○                  | 内科（糖尿病）                                              | 益子 茂                  | 東京通信病院（東京都千代田区富士見2-14-23）                                                                                   |

電話や情報通信機器を用いて診療を実施する医療機関の一覧（東京都）

|    | 基本情報                     |          |                                                |              |                                | 事務連絡に基づく対応について     |                    |                       |                                |                                                                                                                                  |
|----|--------------------------|----------|------------------------------------------------|--------------|--------------------------------|--------------------|--------------------|-----------------------|--------------------------------|----------------------------------------------------------------------------------------------------------------------------------|
|    | 施設名                      | 郵便番号     | 住所（都道府県から記載）                                   | 電話番号         | ウェブサイトURL                      | 初診の電話等を用いた診療の実施の有無 | 再診の電話等を用いた診療の実施の有無 | 対応診療科                 | 担当医師名                          | 対面診療が必要と判断した場合に連携する医療機関名（複数ある場合は複数、住所も併せて記載）                                                                                     |
| 28 | 医療法人社団遠藤クリニック            | 101-0054 | 東京都千代田区神田錦町一丁目8番地1階                            | 03-3295-1013 | www.endo.or.jp                 | ○                  | ○                  | 内科                    | 遠藤 素夫                          |                                                                                                                                  |
| 29 | 医療法人社団響中澤プレスセンタークリニック    | 100-0011 | 東京都千代田区内幸町2-2-1<br>日本プレスセンタービル地下1階             | 03-3500-1101 | https://nakazawa-pcc.net       |                    | ○                  | 外科／（内科）               | 中澤 英樹                          | 虎の門病院                                                                                                                            |
| 30 | 医療法人社団慶洋会ケイアイ飯田橋クリニック    | 102-0072 | 東京都千代田区飯田橋三丁目10番10号<br>ガーデンエアータワー2階            | 03-3239-2777 | kiclinic.jp/kiic               | ○                  | ○                  | 内科／整形外科               | 杉村 香織（内科）／海苔 聡（整形外科）           | JCHO東京新宿メディカルセンター                                                                                                                |
| 31 | 医療法人社団互酬会水道橋東口クリニック      | 101-0061 | 東京都千代田区神田三崎町一丁目3番12号<br>水道橋ビル9階                | 03-3292-1270 | https://www.suidobashi-e-cl.jp |                    | ○                  | 内科／老年内科               | 辻 彼南雄                          | 三井記念病院（東京都千代田区神田和泉町1）<br>東京通信病院（東京都千代田区富士見2-14-23）<br>三楽病院（東京都千代田区神田駿河台2-5）<br>九段坂病院（東京都千代田区九段南1-6-12）<br>杏雲堂病院（東京都千代田区神田駿河台1-8） |
| 32 | 医療法人社団公胤会 東商ビル診療所        | 100-0005 | 東京都千代田区丸の内三丁目2番2号<br>丸の内二重橋ビルディング東京商工会議所ビル地下1階 | 03-3283-7781 | https://www.tosho-clinic.com/  |                    | ○                  | 耳鼻咽喉科／内科              | 杉村 浩美／久武 朋子／上田 晴美              |                                                                                                                                  |
| 33 | 医療法人社団高典会飯田橋クリニック        | 102-0072 | 東京都千代田区飯田橋四丁目6番9号<br>STビル2階                    | 03-3222-6461 |                                | ○                  | ○                  | 皮膚科／形成外科／アレルギー科       | 高橋 典大                          | 東京通信病院（東京都千代田区富士見2-14-23）<br>九段坂病院（東京都千代田区九段南1-6-12）<br>帝京大学医学部附属病院（東京都板橋区加賀2-11-1）                                              |
| 34 | 医療法人社団榊原厚生会榊原サピアタワークリニック | 100-0005 | 東京都千代田区丸の内一丁目7番12号<br>サピアタワー7階                 | 03-5288-0011 | http://sapiatower-clinic.jp    |                    | ○                  | 内科／循環器内科／消化器内科／糖尿病代謝科 | 北原 公一／鎌西 亮子／関根百合子／秋本 恵子／阿部 麻希子 |                                                                                                                                  |
| 35 | 医療法人社団桜メディスン有楽町桜クリニック    | 100-0006 | 東京都千代田区有楽町一丁目7番1号<br>有楽町電気ビル南館7階758区           | 03-6914-5333 |                                |                    | ○                  | 精神科／心療内科              | 神山 昭男                          | 左記施設                                                                                                                             |
| 36 | 医療法人社団山岡クリニック            | 102-0083 | 東京都千代田区麹町麹町四丁目3番地<br>麹町富士ビル2階                  | 03-3264-5160 | yamaoka-clinic.com             | ○                  | ○                  | 内科／小児科／皮膚科            | 鈴木 淳子／今田 義夫／山岡周平／平山 真帆         | 東京通信病院（東京都千代田区富士見2-14-23）<br>九段坂病院（東京都千代田区九段南1-6-12）                                                                             |

電話や情報通信機器を用いて診療を実施する医療機関の一覧（東京都）

|    | 基本情報                       |          |                                     |              |                                          | 事務連絡に基づく対応について     |                    |                               |                   |                                                                                                                                     |
|----|----------------------------|----------|-------------------------------------|--------------|------------------------------------------|--------------------|--------------------|-------------------------------|-------------------|-------------------------------------------------------------------------------------------------------------------------------------|
|    | 施設名                        | 郵便番号     | 住所（都道府県から記載）                        | 電話番号         | ウェブサイトURL                                | 初診の電話等を用いた診療の実施の有無 | 再診の電話等を用いた診療の実施の有無 | 対応診療科                         | 担当医師名             | 対面診療が必要と判断した場合に連携する医療機関名（複数ある場合は複数、住所も併せて記載）                                                                                        |
| 37 | 医療法人社団慈鴻会麹町内科              | 102-0083 | 東京都千代田区麹町二丁目2番地31<br>麹町サンライズビル201号室 | 03-5276-2082 | koujimachinaika.com                      |                    | ○                  | 内科／皮膚科                        | 河野 英雄             | 東京医科歯科大学医学部附属病院（東京都文京区湯島1-5-45）<br>国立国際医療研究センター（東京都新宿区戸山1-21-1）<br>九段坂病院（東京都千代田区九段南1-6-12）<br>医療法人社団あんしん会四谷メディカルキューブ（東京都千代田区二番町7-7） |
| 38 | 医療法人社団授生会杉村レディースクリニック      | 102-0076 | 東京都千代田区五番町2番地<br>横山ビルB1階            | 03-3264-8686 | https://www.ivf-baby.org                 | ○                  | ○                  | 婦人科                           | 赤星 晃一／杉村 和男       |                                                                                                                                     |
| 39 | 医療法人社団順成会 いずみレディースクリニック    | 101-0025 | 東京都千代田区神田佐久間町二丁目18番地5<br>アークビル6階    | 03-3862-7733 | izumi-ladies.jp                          | ○                  | ○                  | 婦人科                           | 柿木 成子             | 三井記念病院（東京都千代田区神田和泉町1）<br>三楽病院（東京都千代田区神田駿河台2-5）                                                                                      |
| 40 | 医療法人社団仁成守会秋元医院             | 101-0042 | 東京都千代田区神田東松下町19番地<br>秋元ビル1階2階       | 03-5297-5888 | http://www.akimotoiiv.jp/                |                    | ○                  | 内科／泌尿器科                       | 秋元 達雄／秋元 成太／小山 利香 |                                                                                                                                     |
| 41 | 医療法人社団晴美会麹町リバース今井整形外科クリニック | 102-0083 | 東京都千代田区麹町四丁目2番地12<br>クーアハウスビル1階・2階  | 03-3261-0700 | http://kojimachi-rebirth.imai-seikei.jp/ |                    | ○                  | 整形外科／漢方科                      | 今井 大              |                                                                                                                                     |
| 42 | 医療法人社団清湘会聖橋クリニック           | 101-0063 | 東京都千代田区神田淡路町2-105<br>ワテラスアネックス5階    | 03-5298-8612 |                                          |                    | ○                  | 内科／糖尿病内科                      | 下田 研二             |                                                                                                                                     |
| 43 | 医療法人社団西端耳鼻咽喉科              | 100-0006 | 東京都千代田区有楽町2-10-1<br>東京交通会館3階        | 03-3214-9047 | http://www.nishihata-ent.or.jp           | ○                  | ○                  | 耳鼻咽喉科／アレルギー科                  | 西端 慎一             | 東京通信病院（東京都千代田区富士見2-14-23）                                                                                                           |
| 44 | 医療法人社団千禮会千代田漢方内科クリニック      | 101-0052 | 東京都千代田区平河町一丁目7番11号 第二大盛丸平河町ビル2階     | 03-5357-1575 |                                          | ○                  | ○                  | 心療内科／アレルギー科／皮膚科／婦人科／漢方内科／泌尿器科 | 信川 益明／團茂樹         | 日本大学病院（千代田区神田駿河台1-6）                                                                                                                |
| 45 | 医療法人社団爽和会お茶の水駿河台クリニック      | 101-0062 | 東京都千代田区神田駿河台2-1-47<br>廣瀬お茶の水ビル1・2階  | 03-5280-9122 | www.gazo.or.jp                           |                    | ○                  | 内科／消化器内科                      | 中元 和也／杉本 貴史／小林 敏  |                                                                                                                                     |

電話や情報通信機器を用いて診療を実施する医療機関の一覧（東京都）

|    | 基本情報                 |          |                                         |              |                                | 事務連絡に基づく対応について     |                    |                              |                                                            |                                                                                          |
|----|----------------------|----------|-----------------------------------------|--------------|--------------------------------|--------------------|--------------------|------------------------------|------------------------------------------------------------|------------------------------------------------------------------------------------------|
|    | 施設名                  | 郵便番号     | 住所（都道府県から記載）                            | 電話番号         | ウェブサイトURL                      | 初診の電話等を用いた診療の実施の有無 | 再診の電話等を用いた診療の実施の有無 | 対応診療科                        | 担当医師名                                                      | 対面診療が必要と判断した場合に連携する医療機関名（複数ある場合は複数、住所も併せて記載）                                             |
| 46 | 医療法人社団多美会みきクリニック市ヶ谷  | 102-0074 | 東京都千代田区九段南四丁目3番7号<br>翠ビルB1F             | 03-3234-5421 | http://www.miki-beauty.com     | ○                  | ○                  | 皮膚科／形成外科                     | 多久嶋 美紀／<br>菱沼 茂之                                           | 東京通信病院（東京都千代田区富士見2-14-23）<br>杏林大学医学部附属病院（東京都三鷹市新川6-20-2）                                 |
| 47 | 医療法人社団大政クリニック        | 102-0083 | 東京都千代田区麹町四丁目3番地<br>麹町富士ビル2階             | 03-3556-7875 |                                |                    | ○                  | 胃腸科／肛門科                      | 大政 良二                                                      |                                                                                          |
| 48 | 医療法人社団中興会内外クリニック     | 100-0006 | 東京都千代田区有楽町0番地<br>銀座インズ3                 | 03-3562-5971 |                                | ○                  | ○                  | 内科                           | 中村 治道／奥<br>脇 純子／石松<br>隆子                                   | 患者地元の病院<br>聖路加国際病院（東京都中央区明石町9-1）<br>東京通信病院（東京都千代田区富士見2-14-23）<br>三井記念病院（東京都千代田区神田和泉町1）   |
| 49 | 医療法人社団八橋会飯田橋耳鼻咽喉科医院  | 102-0071 | 東京都千代田区富士見二丁目1番10号<br>飯田橋ビル6階           | 03-3230-1916 | iidabashijibika.com            | ○                  | ○                  | 耳鼻咽喉科                        | 八幡 則子／和<br>多田 有紀子                                          | 東京通信病院（東京都千代田区富士見2-14-23）<br>JCHO東京新宿メディカルセンター（東京都新宿区津久戸町5-1）<br>日本大学病院（東京都千代田区神田駿河台1-6） |
| 50 | 医療法人社団碧桜秋葉原駅クリニック    | 101-0025 | 東京都千代田区神田佐久間町二丁目1番地<br>大原ビル4F           | 03-5835-2860 | www.ekic.jp                    |                    | ○                  | 内科                           | 大和田 潔／<br>佐々木 欧                                            |                                                                                          |
| 51 | 医療法人社団芳雅会 内神田皮膚科     | 101-0047 | 東京都千代田区内神田2-13-7<br>石原ビル1階              | 03-6260-9515 | http://kanda-hifuka.jp         |                    | ○                  | 皮膚科                          | 白井 明／森<br>悦子／遠藤 幸<br>紀／白砂 智紹                               | 三井記念病院（東京都千代田区神田和泉町1）<br>東京通信病院（東京都千代田区富士見2-14-23）<br>東京大学医学部附属病院                        |
| 52 | 医療法人社団丸の内クリニック       | 100-0005 | 東京都千代田区丸の内1-6-2<br>新丸の内センタービルディング4F     | 03-5223-8822 | http://marunouchi-c.org/       |                    | ○                  | 内科<br>皮膚科<br>婦人科             | 石川 隆、松田<br>梨恵<br>金子 健彦<br>熊谷 万紀子、<br>神津 円                  |                                                                                          |
| 53 | 医療法人社団裕健会神田クリニック     | 101-0047 | 東京都千代田区内神田二丁目4番1号<br>神田メディカルビル地下1階、2～8階 | 03-3252-0621 | https://www.kanda.or.jp        |                    | ○                  | 内科／循環器内<br>科／消化器内科<br>／糖尿病内科 | 和田 理恵／馬<br>淵 浩輔／小黒<br>雅子／酒井 伸<br>宮本 正章／<br>吉田 任子／時<br>田 美和 |                                                                                          |
| 54 | 医療法人社団雄仁会 メディカルケア大手町 | 100-0004 | 東京都千代田区大手町二丁目2番1号<br>新大手町ビル地下1階         | 03-6262-1666 | www.medcare-tora.com/otemachi/ |                    | ○                  | 精神科／心療内<br>科                 | 五十嵐 良雄／<br>森田 哲也／長<br>尾 博司                                 | メディカルケア虎ノ門（東京都港区虎ノ門1-16-16 虎ノ門一丁目MGビル3階・4階）                                              |

電話や情報通信機器を用いて診療を実施する医療機関の一覧（東京都）

|    | 基本情報                     |          |                                  |              |                                        | 事務連絡に基づく対応について     |                    |                    |                                         |                                                                                                 |
|----|--------------------------|----------|----------------------------------|--------------|----------------------------------------|--------------------|--------------------|--------------------|-----------------------------------------|-------------------------------------------------------------------------------------------------|
|    | 施設名                      | 郵便番号     | 住所（都道府県から記載）                     | 電話番号         | ウェブサイトURL                              | 初診の電話等を用いた診療の実施の有無 | 再診の電話等を用いた診療の実施の有無 | 対応診療科              | 担当医師名                                   | 対面診療が必要と判断した場合に連携する医療機関名（複数ある場合は複数、住所も併せて記載）                                                    |
| 55 | 医療法人社団撫会九段ごみぶちクリニック      | 102-0073 | 東京都千代田区九段北二丁目3番1号<br>九段増田ビル2階    | 03-3263-0161 | http://gomibuchi-clinic.com            |                    | ○                  | 精神科/心療内科           | 五味 潤 隆志                                 | 適宜                                                                                              |
| 56 | 医療法人社団誠和堂丸山医院            | 101-0061 | 東京都千代田区神田三崎町二丁目20番1号<br>第二石川ビル5階 | 03-3261-9679 | https://www.maruyama-clinic.or.jp      |                    | ○                  | 耳鼻咽喉科/気管食道科/アレルギー科 | 丸山 毅                                    |                                                                                                 |
| 57 | 医療法人社団滝医院                | 102-0074 | 東京都千代田区九段南四丁目3番1号                | 03-3264-3101 | http://www.nt.pial.jp/taki-iin/        | ○                  | ○                  | 内科/小児科/糖尿病内科       | 滝 正彦/滝 雅史/滝 ゆうこ                         | グローバルヘルスケアクリニック（東京都千代田区麹町3-12 麹町MSビル1階）<br>東京通信病院（東京都千代田区富士見2-14-23）<br>日本大学病院（東京都千代田区神田駿河台1-6） |
| 58 | 医療法人社団糠正会飯田橋メディカルクリニック   | 102-0072 | 東京都千代田区飯田橋三丁目4番10号<br>飯田橋エルシビル2F | 03-3237-7633 | https://iidabashimedical.com           |                    | ○                  | 糖尿病内科              | 丹羽 正孝                                   |                                                                                                 |
| 59 | 医療法人社団みすまのさと会アイ・ローズクリニック | 100-0013 | 東京都千代田区霞が関一丁目4番1号<br>日土地ビル1階     | 03-3503-3900 |                                        |                    | ○                  | 眼科                 | 安達 京                                    |                                                                                                 |
| 60 | 医療法人聖光園細野診療所東京診療所        | 100-0006 | 東京都千代田区有楽町有楽町一丁目2番14号<br>紫ビル4階   | 03-5251-3637 | www.hosonokanpo.com                    |                    | ○                  | 内科/漢方              | 細野 孝郎                                   |                                                                                                 |
| 61 | 医療法人社団恒正会そねクリニック丸の内      | 100-0005 | 東京都千代田区丸の内一丁目8番2号 鉄鋼ビルディング地下1階   | 03-6212-3888 | https://www.soneclinic-marunouchi.com/ |                    | ○                  | 内科                 | 種市 春仁                                   |                                                                                                 |
| 62 | 医療法人社団 縁風会ユアクリニックお茶の水    | 101-0062 | 東京都千代田区神田駿河台2-4<br>日健ビル3F        | 03-3259-1190 | https://yourclinic.jp                  | ○                  | ○                  | 内科<br>皮膚科          | 國廣 崇<br>井上 真璃子<br>宮内 隆政<br>杉山 美紀子       | 東京医科歯科大学医学部附属病院(文京区湯島1-5-45)<br>日本大学病院(千代田区神田駿河台1-6)                                            |
| 63 | 医療法人社団 縁風会ユアクリニック秋葉原     | 101-0021 | 東京都千代田区外神田4-9-2<br>千住ビル4F        | 03-3256-1180 | https://yourclinicakb.jp               | ○                  | ○                  | 内科<br>小児科          | 杉原 桂<br>宮内 隆政<br>松野 由以<br>渡邊 太郎<br>安原 務 | 日本大学病院(千代田区神田駿河台1-6)<br>東京通信病院(千代田区富士見2-14-23)                                                  |

電話や情報通信機器を用いて診療を実施する医療機関の一覧（東京都）

|    | 基本情報                           |          |                                   |              |                                                  | 事務連絡に基づく対応について     |                    |                   |                  |                                                                                                  |
|----|--------------------------------|----------|-----------------------------------|--------------|--------------------------------------------------|--------------------|--------------------|-------------------|------------------|--------------------------------------------------------------------------------------------------|
|    | 施設名                            | 郵便番号     | 住所（都道府県から記載）                      | 電話番号         | ウェブサイトURL                                        | 初診の電話等を用いた診療の実施の有無 | 再診の電話等を用いた診療の実施の有無 | 対応診療科             | 担当医師名            | 対面診療が必要と判断した場合に連携する医療機関名（複数ある場合は複数、住所も併せて記載）                                                     |
| 64 | 医療法人社団慶翔会神田須田町アイクリニック          | 101-0041 | 東京都千代田区神田須田町1-3-1 須田町ビル2階         | 03-5207-2882 | http://kanda-eye.com                             | ○                  | ○                  | 眼科                | 吉野 麻未            | 両国眼科クリニック（東京都墨田区両国4-33-12 グラン・アルブル両国1F）<br>医療法人社団慶翔会飯田橋眼科クリニック（東京都千代田区飯田橋三丁目10番10号 ガーデンエアータワー2階） |
| 65 | 医療法人社団青十字会日比谷国際クリニック           | 100-0011 | 東京都千代田区内幸町二丁目2番3号 日比谷国際ビル地下1階     | 03-3503-3430 | www.hibiyakokusai.or.jp                          | ○                  | ○                  | 内科                | 馬島／福田／櫻岡         |                                                                                                  |
| 66 | 医療法人社団青十字会日比谷国際クリニック法務省共済組合診療所 | 100-0013 | 東京都千代田区霞が関一丁目1番1号 中央合同庁舎第6号館A棟17階 | 03-3592-4055 |                                                  |                    | ○                  | 内科                | 鈴木 直美            |                                                                                                  |
| 67 | 医療法人社団正誠会林医院                   | 101-0021 | 東京都千代田区外神田三丁目7番1号 1階・2階           | 03-3253-7436 | https://hayashi-clinic.com                       | ○                  | ○                  | 内科／消化器科           | 林 久太佳            | 三井記念病院（東京都千代田区神田和泉町1）<br>東京医科歯科大学医学部附属病院（東京都文京区湯島1-5-45）                                         |
| 68 | 医療法人社団医新会 神田医新クリニック            | 101-0032 | 東京都千代田区岩本町2-2-13 1～7階             | 03-5833-3240 | https://www.ishin-kai.or.jp                      |                    | ○                  | 泌尿器科／内科           | 藤原 博通            |                                                                                                  |
| 69 | 医療法人社団知慎会 JTKクリニック             | 102-0083 | 東京都千代田区麹町4-1-5 麹町志村ビル2階           | 03-6261-6386 | https://www.jtkclinic.com                        | ○                  | ○                  | 内科                | 小笠原 均            |                                                                                                  |
| 70 | 医療法人社団混志会瀬田クリニック東京             | 101-0062 | 東京都千代田区神田駿河台2-1-45 ニュー駿河台ビル3階     | 03-5280-0086 | http://www.j-immunother.com                      | ○                  | ○                  | 内科                | 瀧本 理修／後藤 重則／神垣 隆 |                                                                                                  |
| 71 | 医療法人社団渡邊内科                     | 100-0004 | 東京都千代田区大手町一丁目7番2号 東京サンケイビル地下1階    | 03-3245-2800 | www.drwatanabe.com                               | ○                  | ○                  | 呼吸器内科／循環器内科／消化器内科 | 渡邊 龍彦            | 東京通信病院（東京都千代田区富士見2-14-23）                                                                        |
| 72 | イワサキクリニック東京                    | 101-0044 | 東京都千代田区鍛冶町二丁目9番5号 東園ビル3階          | 03-3256-0055 | http://www.soujikai.jp/clinic/iwasaki-tokyo.html |                    | ○                  | アレルギー科            | 岩崎 純夫            |                                                                                                  |



電話や情報通信機器を用いて診療を実施する医療機関の一覧（東京都）

|    | 基本情報                 |          |                                                           |              |                                                                                       | 事務連絡に基づく対応について     |                    |          |                              |                                                                            |
|----|----------------------|----------|-----------------------------------------------------------|--------------|---------------------------------------------------------------------------------------|--------------------|--------------------|----------|------------------------------|----------------------------------------------------------------------------|
|    | 施設名                  | 郵便番号     | 住所（都道府県から記載）                                              | 電話番号         | ウェブサイトURL                                                                             | 初診の電話等を用いた診療の実施の有無 | 再診の電話等を用いた診療の実施の有無 | 対応診療科    | 担当医師名                        | 対面診療が必要と判断した場合に連携する医療機関名（複数ある場合は複数、住所も併せて記載）                               |
| 73 | HDCアトラスクリニック         | 102-0082 | 東京都千代田区一番町5番地3<br>アトラスビル1階                                | 03-3234-6060 |                                                                                       | ○                  | ○                  | 糖尿病内科／内科 | 鈴木 吉彦                        | 慶應義塾大学病院                                                                   |
| 74 | エムアンドエムスキンケアクリニック    | 101-0051 | 東京都千代田区神田神保町二丁目9番地<br>神田神保町メディカルモール3階                     | 03-3556-8866 |                                                                                       |                    | ○                  | 皮膚科／形成外科 | 鈴木 みね子／<br>今野 みどり／<br>萩原 ゆかり |                                                                            |
| 75 | エムズクリニック九段下          | 101-0051 | 東京都千代田区神田神保町三丁目5番地<br>ニュー徳栄ビル8階                           | 03-3239-5857 | <a href="http://www.ms-clinic.com">http://www.ms-clinic.com</a>                       |                    | ○                  | 精神科／心療内科 | 藤田 充明                        |                                                                            |
| 76 | 大島眼科医院               | 102-0074 | 東京都千代田区九段南四丁目7番13号<br>市ヶ谷安田ビル2階                           | 03-3261-4132 | <a href="http://www.oshima-eye.com">http://www.oshima-eye.com</a>                     |                    | ○                  | 眼科       | 大島 剛                         |                                                                            |
| 77 | 大手町フィナンシャルシティ西山クリニック | 100-0004 | 東京都千代田区大手町大手町一丁目9番4号<br>大手町フィナンシャルシティノースタワー4階             | 03-3270-2986 | <a href="http://kouko-clinic-nishiyama">kouko-clinic-nishiyama</a>                    |                    | ○                  | 内科／循環器科  | 西山 信一郎                       | 虎の門病院（東京都港区虎ノ門2-2-2）<br>聖路加国際病院（東京都中央区明石町9-1）<br>東京通信病院（東京都千代田区富士見2-14-23） |
| 78 | 大手町プレイス内科            | 100-0004 | 東京都千代田区大手町二丁目3番1号<br>大手町プレイスウエストタワー地下1階 B10<br>9区画、B110区画 | 03-6262-5622 | <a href="http://otemachi-place-naika.clinic/">http://otemachi-place-naika.clinic/</a> |                    | ○                  | 内科／糖尿病   | 田嶋 尚子                        |                                                                            |
| 79 | 大森胃腸科                | 102-0092 | 東京都千代田区隼町2-15                                             | 03-3234-6226 | <a href="http://oomori-i.jp">oomori-i.jp</a>                                          |                    | ○                  | 内科       | 大森 格                         | 東京通信病院（東京都千代田区富士見2-14-23）                                                  |
| 80 | お茶の水血管外科クリニック        | 101-0062 | 東京都千代田区神田駿河台二丁目1番地<br>ヒルクレスト御茶ノ水5階                        | 03-5281-4103 | <a href="https://www.kekkangeka.com">https://www.kekkangeka.com</a>                   |                    | ○                  | 血管外科     | 廣川 雅之／栗<br>原 伸久／伴<br>祐子      | 三楽病院（東京都千代田区神田駿河台2-5）                                                      |
| 81 | 貝坂クリニック              | 102-0093 | 東京都千代田区平河町一丁目4番12号<br>平河町センタービル10階3号                      | 03-5213-6710 |                                                                                       | ○                  | ○                  | 内科       | 高野 学美／高<br>野 義人              | 東京通信病院（東京都千代田区富士見2-14-23）                                                  |

電話や情報通信機器を用いて診療を実施する医療機関の一覧（東京都）

|    | 基本情報                    |          |                                     |               |                              | 事務連絡に基づく対応について     |                    |                                                |                                                            |                                              |
|----|-------------------------|----------|-------------------------------------|---------------|------------------------------|--------------------|--------------------|------------------------------------------------|------------------------------------------------------------|----------------------------------------------|
|    | 施設名                     | 郵便番号     | 住所（都道府県から記載）                        | 電話番号          | ウェブサイトURL                    | 初診の電話等を用いた診療の実施の有無 | 再診の電話等を用いた診療の実施の有無 | 対応診療科                                          | 担当医師名                                                      | 対面診療が必要と判断した場合に連携する医療機関名（複数ある場合は複数、住所も併せて記載） |
| 82 | 加賀耳鼻咽喉科クリニック            | 101-0051 | 東京都千代田区神田神保町一丁目3番地1<br>加賀耳鼻科ビル1階2階  | 03-3295-3387  | http://www.kaga.min.gr.jp    |                    | ○                  | 耳鼻咽喉科                                          | 相田 瑞恵                                                      |                                              |
| 83 | 霞が関アーバンクリニック            | 100-0013 | 東京都千代田区霞が関一丁目4番1号<br>日土地ビル1階        | 03-5157-3911  | https://www.urban-clinic.jp/ |                    | ○                  | 内科/リウマチ科/膠原病内科/整形外科/アレルギー科/精神科/脳神経内科/皮膚科/呼吸器内科 | 西岡 久寿樹/中島 正男/臼井 千恵/西岡 健弥/高柳 広/森本 幾夫/友利 新/石原 陽子/津田 淳子/平井 利明 |                                              |
| 84 | 株式会社日立製作所本社秋葉原ダイビル診療所   | 101-8608 | 東京都千代田区外神田一丁目18番13号秋葉原ダイビル17F       | 03-4564-3423  |                              | ○                  | ○                  | 内科                                             | 秋山義之、大友夏子                                                  |                                              |
| 85 | 株式会社日立製作所本社丸の内センタービル診療所 | 100-8220 | 東京都千代田区丸の内一丁目6番1号丸の内センタービルディング12F   | 03-4235-4244  |                              | ○                  | ○                  | 内科                                             | 秋山義之、大友夏子                                                  |                                              |
| 86 | 河内クリニック                 | 101-0063 | 東京都千代田区神田淡路町一丁目9番地1<br>ニューお茶の水ビル301 | 03-3252-8225  |                              |                    | ○                  | 精神科/神経科                                        | 河内 清                                                       | 左記施設                                         |
| 87 | 神田医院                    | 101-0044 | 東京都千代田区鍛冶町1-8-6<br>神田KSビル2F         | 03-3252-8896  | www.kanda-iin.com            | ○                  | ○                  | 内科/循環器内科/精神科/心療内科                              | 里井 重仁（初診対応・再診内科）/里井 孝光（再診のみ内科・循内）/石井 元康（再診のみ 精・心）          | 三井記念病院（東京都千代田区神田和泉町1）                        |
| 88 | 神田ウィメンズクリニック            | 101-0044 | 東京都千代田区鍛冶町二丁目8番6号<br>メディカルプライム神田6階  | 03-6206-0065  | https://kandawomens.com      | ○                  | ○                  | 生殖医療婦人科/婦人科                                    | 清水 真弓                                                      |                                              |
| 89 | 神田駅東口クリニック              | 101-0044 | 東京都千代田区鍛冶町二丁目8番6号<br>メディカルプライム神田2階  | 03-6271-7916  | https://kanda.clinic         | ○                  | ○                  | 内科                                             | 馬淵 浩輔/吉田 任子                                                |                                              |
| 90 | 神田北口診療所                 | 101-0047 | 東京都千代田区内神田三丁目20番3号<br>小鍛冶ビル4階       | 050-5840-6565 | https://kandakita.clinic/    | ○                  | ○                  | 内科                                             | 内山 武史/岡田 恭江/福田 貴規/安井 梢子                                    |                                              |

電話や情報通信機器を用いて診療を実施する医療機関の一覧（東京都）

|    | 基本情報           |          |                                             |              |                                           | 事務連絡に基づく対応について     |                    |                            |        |                                                                                                                                                                       |
|----|----------------|----------|---------------------------------------------|--------------|-------------------------------------------|--------------------|--------------------|----------------------------|--------|-----------------------------------------------------------------------------------------------------------------------------------------------------------------------|
|    | 施設名            | 郵便番号     | 住所（都道府県から記載）                                | 電話番号         | ウェブサイトURL                                 | 初診の電話等を用いた診療の実施の有無 | 再診の電話等を用いた診療の実施の有無 | 対応診療科                      | 担当医師名  | 対面診療が必要と判断した場合に連携する医療機関名（複数ある場合は複数、住所も併せて記載）                                                                                                                          |
| 91 | 神田すこやかクリニック    | 101-0041 | 東京都千代田区神田須田町1-30-1-104                      | 03-6206-0153 | http://www.kanda-sukoyaka.com             | ○                  | ○                  | 内科<br>皮膚科・アレルギー科           | 橋本 亮   | 国立国際医療研究センター病院（新宿区戸山1-21-1）                                                                                                                                           |
| 92 | 神田ホリスティックひふ科   | 101-0054 | 東京都千代田区神田錦町二丁目1番地5<br>マストライフ神田錦町1階          | 03-3294-1112 |                                           | ○                  | ○                  | 皮膚科                        | 若松 順子  | 東京医科大学病院（東京都新宿区西新宿7-6-1）                                                                                                                                              |
| 93 | 紀尾井町内科         | 102-0094 | 東京都千代田区紀尾井町3番1号<br>K K Dビル1階                | 03-6265-6500 | https://kioichonaika.jp                   | ○                  | ○                  | 内科／循環器科                    | 市村 有紀子 |                                                                                                                                                                       |
| 94 | 九段こころのクリニック    | 102-0073 | 東京都千代田区九段北一丁目1番5号<br>第二中央ビル3階               | 03-6256-8397 | kudan-kokoro.clinic/                      | ○                  | ○                  | 心療内科／精神科                   | 後藤 牧子  | 順天堂大学医学部附属病院（東京都文京区本郷2-1-1）                                                                                                                                           |
| 95 | 九段下さくら形成外科・皮膚科 | 102-0073 | 東京都千代田区九段北一丁目3番1号<br>日宝九段下ビル5階              | 03-3222-8341 | https://sakura-skin.jp                    | ○                  | ○                  | 皮膚科／形成外科<br>小児皮膚科<br>美容皮膚科 | 木下 佳保里 | 九段坂病院（東京都千代田区九段南1-6-12）<br>東京通信病院（東京都千代田区富士見2-14-23）                                                                                                                  |
| 96 | 九段下駅前ココクリニック   | 102-0073 | 東京都千代田区九段北一丁目2番1号<br>九段中央ビル3階               | 03-5212-5551 | http://kudanshita.clinic                  | ○                  | ○                  | 内科／循環器内科<br>内分泌・代謝内科       | 石井 聡   |                                                                                                                                                                       |
| 97 | 九段下駅前まめクリニック   | 102-0073 | 東京都千代田区九段北一丁目3番2号<br>大橋ビル3階                 | 03-6256-9273 | https://mame-clinic.jp                    | ○                  | ○                  | 内科                         | 石川 雅俊  | 三井記念病院（東京都千代田区神田和泉町1）<br>東京通信病院（東京都千代田区富士見2-14-23）<br>日本大学病院（東京都千代田区神田駿河台1-6）<br>順天堂大学医学部附属順天医院<br>三楽病院（東京都千代田区神田駿河台2-5）<br>JCHO東京新宿メディカルセンター<br>東京大学医学部附属病院<br>虎の門病院 |
| 98 | クリニックフォア飯田橋    | 102-0071 | 東京都千代田区富士見二丁目7番1号<br>飯田橋プレーン1階              | 03-4579-9486 | https://www.clinicfor.life/iid<br>abashi/ | ○                  | ○                  | 内科／皮膚科<br>アレルギー科           | 渡辺 絵梨沙 | 済生会中央病院（東京都港区三田1-4-17）<br>東京通信病院（東京都千代田区富士見2-14-23）<br>虎の門病院（東京都港区虎ノ門2-2-2）<br>東京医科大学病院（東京都新宿区西新宿7-6-1）                                                               |
| 99 | クリニックフォア有楽町    | 100-0006 | 東京都千代田区有楽町二丁目7番1号<br>有楽町駅前ビルディングイトシアプラザ地下1階 | 03-6269-9061 | www.clinicfor.life/yurakucho/             | ○                  | ○                  | 内科／皮膚科<br>アレルギー科           | 永田 明久  | 済生会中央病院（東京都港区三田1-4-17）<br>虎の門病院（東京都港区虎ノ門2-2-2）<br>東京慈恵会医科大学附属病院（東京都港区西新橋3-19-18）                                                                                      |

電話や情報通信機器を用いて診療を実施する医療機関の一覧（東京都）

|     | 基本情報                     |          |                                    |              |                                  | 事務連絡に基づく対応について     |                    |                                                       |                                                           |                                                                                                                                                      |
|-----|--------------------------|----------|------------------------------------|--------------|----------------------------------|--------------------|--------------------|-------------------------------------------------------|-----------------------------------------------------------|------------------------------------------------------------------------------------------------------------------------------------------------------|
|     | 施設名                      | 郵便番号     | 住所（都道府県から記載）                       | 電話番号         | ウェブサイトURL                        | 初診の電話等を用いた診療の実施の有無 | 再診の電話等を用いた診療の実施の有無 | 対応診療科                                                 | 担当医師名                                                     | 対面診療が必要と判断した場合に連携する医療機関名（複数ある場合は複数、住所も併せて記載）                                                                                                         |
| 100 | グローバルヘルスケアクリニック          | 102-0083 | 東京都千代田区麹町三丁目1番地<br>麹町MSビル1階        | 03-3222-8832 | https://ghc.tokyo                | ○                  | ○                  | 内科/小児科/<br>アレルギー科                                     | 水野 泰孝                                                     |                                                                                                                                                      |
| 101 | ケイアイ秋葉原クリニック             | 101-0023 | 東京都千代田区神田松永町1-1AT第一ビル              | 03-3255-8755 | http://kiclinic.jp/kiac/         | ○                  | ○                  | 内科                                                    | 石原 雅巳                                                     | 三井記念病院（東京都千代田区神田和泉町1番地）                                                                                                                              |
| 102 | 公益財団法人佐々木研究所附属 杏雲堂病院     | 101-0062 | 東京都千代田区神田駿河台1-8                    | 03-3292-2051 | https://www.kyoundo-hospital.jp/ |                    | ○                  | 内科/外科/婦人科/整形外科/乳腺外科/循環器科/消化内科/腫瘍内科/呼吸器科/皮膚科/泌尿器科/放射線科 | 各医師                                                       | 日本大学病院（東京都千代田区神田駿河台1-6）<br>日本大学医学部附属板橋病院（東京都板橋区大谷口上町30-1）<br>東京医科歯科大学医学部附属病院（東京都文京区湯島1-5-45）<br>東京大学医学部附属病院（東京都文京区本郷7-3-1）<br>東京警察病院（東京都中野区中野4-22-1） |
| 103 | 公益財団法人神経研究所附属睡眠呼吸障害クリニック | 101-0061 | 東京都千代田区三崎町二丁目1番11号<br>堀内三崎町ビル2階    | 03-3556-9181 | http://www.suiminclinic.com      |                    | ○                  | 呼吸器内科/精神科                                             | 福原 俊明/大賀 栄次郎/伊藤 永喜/松本 容子/結城 将明/中島 大輝/梶村 尚史/福田 健介/河野 史彦/由井 |                                                                                                                                                      |
| 104 | 麹町眼科                     | 102-0094 | 東京都千代田区紀尾井町3番19号<br>紀尾井町コートビル201   | 03-3222-0041 |                                  |                    | ○                  | 眼科/内科                                                 | 新本 和英                                                     | 国立国際医療研究センター（東京都新宿区戸山1-21-1）<br>JCHO東京新宿メディカルセンター（東京都新宿区津久戸町5-1）                                                                                     |
| 105 | 麹町消化器・内視鏡クリニック           | 102-0083 | 東京都千代田区麹町四丁目6番地8<br>ダイニチ麹町ビル1階     | 03-5215-1114 | https://kojimachi-gc.com         | ○                  | ○                  | 消化器内科/内視鏡内科/肛門外科/内科                                   | 内田 寛                                                      | 東京通信病院（東京都千代田区富士見2-14-23）<br>九段坂病院（東京都千代田区九段南1-6-12）                                                                                                 |
| 106 | 麹町皮膚科・形成外科クリニック          | 102-0093 | 東京都千代田区平河町1-4-5平和第一ビル地下1階          | 03-6261-2458 | https://kojihifu.com/            | ○                  | ○                  | 皮膚科                                                   | 苅部 淳<br>坂本 淳                                              |                                                                                                                                                      |
| 107 | ココロモクリニック神田              | 101-0044 | 東京都千代田区鍛冶町二丁目8番6号<br>メディカルプライム神田5階 | 03-3254-5560 | kokoromo.jp                      | ○                  | ○                  | 精神科/心療内科                                              | 山下 佑介                                                     |                                                                                                                                                      |
| 108 | 国家公務員共済組合連合会 九段坂病院       | 102-0074 | 東京都千代田区九段南1-6-12                   | 03-3262-9191 | http://www.kudanzaka.com/        |                    | ○                  | 内科 外科 整形外科 皮膚科 泌尿器科 婦人科 耳鼻咽喉科 眼科                      | 当日担当医師                                                    | 自院にて対応                                                                                                                                               |

電話や情報通信機器を用いて診療を実施する医療機関の一覧（東京都）

|     | 基本情報          |          |                                     |              |                                      | 事務連絡に基づく対応について     |                    |                                                                            |              |                                                                              |
|-----|---------------|----------|-------------------------------------|--------------|--------------------------------------|--------------------|--------------------|----------------------------------------------------------------------------|--------------|------------------------------------------------------------------------------|
|     | 施設名           | 郵便番号     | 住所（都道府県から記載）                        | 電話番号         | ウェブサイトURL                            | 初診の電話等を用いた診療の実施の有無 | 再診の電話等を用いた診療の実施の有無 | 対応診療科                                                                      | 担当医師名        | 対面診療が必要と判断した場合に連携する医療機関名（複数ある場合は複数、住所も併せて記載）                                 |
| 109 | こばなわ神田整形外科    | 101-0044 | 東京都千代田区鍛冶町二丁目2番9号<br>第二登栄ビル6階       | 03-5297-2462 | kandaseikei.com                      |                    | ○                  |                                                                            | 小嶋 幸司        |                                                                              |
| 110 | さくらの木クリニック秋葉原 | 101-0033 | 東京都千代田区神田岩本町1番地<br>清水ビル2階           | 03-3255-3960 | http://www.sakuranoki-akihabara.com/ |                    | ○                  | 精神科                                                                        | 倉持 穰         | 東京医科歯科大学医学部附属病院（東京都文京区湯島1-5-45）<br>三井記念病院（東京都千代田区神田和泉町1）                     |
| 111 | 佐々木内科クリニック    | 102-0083 | 東京都千代田区麴町四丁目4番地6<br>麴町四丁目小倉ビル2階     | 03-3264-3635 | http://www.sasaki-m-clinic.com       | ○                  | ○                  | 内科／小児科                                                                     | 佐々木 俊治       | 東京通信病院（東京都千代田区富士見2-14-23）<br>順天堂医院（東京都文京区本郷3-1-3）<br>日本大学病院（東京都千代田区神田駿河台1-6） |
| 112 | 山王メディカルクリニック  | 100-0014 | 東京都千代田区永田町二丁目12番8号<br>永田町SRビル1階     | 03-3539-3012 | www.s-med.jp                         | ○                  | ○                  | 皮膚科                                                                        | 宮地 百子        | 北里研究所病院（東京都港区白金5-9-1）<br>済生会中央病院（東京都港区三田1-4-17）<br>慶應義塾大学病院（東京都新宿区信濃町35）     |
| 113 | 島田内科          | 101-0047 | 東京都千代田区内神田二丁目11番1号<br>島田ビル9階        | 03-3252-0121 |                                      | ○                  | ○                  | 内科                                                                         | 島田 英世        |                                                                              |
| 114 | 社会福祉法人 三井記念病院 | 101-8643 | 東京都千代田区神田和泉町1番地                     | 03-3862-9111 | https://www.mitsuihosp.or.jp         |                    | ○                  | 全診療科（内. 呼内. 消内. 循内. 小. 神内. 精. 外. 消外. 呼外. 整. 脳外. 産婦. 眼. 耳鼻. 泌. 皮. 麻. 歯. 歯外） | 全医師          |                                                                              |
| 115 | 常喜医院          | 102-0085 | 東京都千代田区六番町7番地1<br>番町グロリアビル1階        | 03-5226-7557 | joki-clinic.jp                       | ○                  | ○                  | 内科／皮膚科                                                                     | 常喜 眞理        |                                                                              |
| 116 | 神保町駅前皮膚科      | 101-0051 | 東京都千代田区神田神保町1-7-12<br>巖松堂ビル6階       | 03-5577-3877 | https://jimbocho-hifu.com            |                    | ○                  | 皮膚科／アレルギー科                                                                 | 中村 明博／後藤 あかね | 東京通信病院（東京都千代田区富士見2-14-23）                                                    |
| 117 | 神保町整形外科       | 101-0051 | 東京都千代田区神田神保町一丁目29番地<br>すずらんビル2階3階4階 | 03-5577-7997 | https://www.jimbocho-seikei.com      | ○                  | ○                  | 整形外科                                                                       | 板倉 剛         | 慶應義塾大学病院（東京都新宿区信濃町35）<br>聖路加国際病院（東京都中央区明石町9-1）<br>日本大学病院（東京都千代田区神田駿河台1-6）    |

電話や情報通信機器を用いて診療を実施する医療機関の一覧（東京都）

|     | 基本情報                         |          |                                             |               |                                                                       | 事務連絡に基づく対応について     |                    |                          |                                  |                                              |
|-----|------------------------------|----------|---------------------------------------------|---------------|-----------------------------------------------------------------------|--------------------|--------------------|--------------------------|----------------------------------|----------------------------------------------|
|     | 施設名                          | 郵便番号     | 住所（都道府県から記載）                                | 電話番号          | ウェブサイトURL                                                             | 初診の電話等を用いた診療の実施の有無 | 再診の電話等を用いた診療の実施の有無 | 対応診療科                    | 担当医師名                            | 対面診療が必要と判断した場合に連携する医療機関名（複数ある場合は複数、住所も併せて記載） |
| 118 | 神保町たねもと眼科                    | 101-0054 | 東京都千代田区神田錦町三丁目18番地10<br>浜田ビル1階              | 03-5577-2913  |                                                                       |                    | ○                  | 眼科                       | 種元 桂子                            | 左記施設                                         |
| 119 | 水道橋メディカルクリニック                | 101-0065 | 東京都千代田区西神田一丁目4番11号<br>サンボウ水道橋ビル301号         | 03-3518-6127  |                                                                       |                    | ○                  | 内科                       | 砂山 聡                             | 順天堂医院（東京都文京区本郷3-1-3）                         |
| 120 | 駿河台こころのクリニック                 | 101-0062 | 東京都千代田区神田駿河台三丁目2番地6<br>A・P l a z a 御茶の水ビル7階 | 03-3257-5678  | <a href="http://surugadai-kokoro.com">http://surugadai-kokoro.com</a> |                    | ○                  | 心療内科／精神科                 | 宮武 良輔                            |                                              |
| 121 | 聖堂前クリニック                     | 101-0052 | 東京都千代田区神田小川町3-1-10<br>メディカビル6階              | 050-3734-5574 | <a href="https://selidomae.com">https://selidomae.com</a>             |                    | ○                  | 精神科                      | 木村 智城                            |                                              |
| 122 | 聖路加国際病院附属クリニック聖路加メディロウカス     | 100-0004 | 東京都千代田区大手町1-9-7<br>大手町フィナンシャルシティサウスタワー2階    | 03-3527-9520  | <a href="http://medilocus.luke.ac.jp">http://medilocus.luke.ac.jp</a> |                    | ○                  | 内科／呼吸器内科／循環器内科／消化器内科／婦人科 | 本多 一文／藤井 さと子／田草川 正弘／酒田 智子／岡田 瑠理子 |                                              |
| 123 | 瀬木診療所                        | 101-0032 | 東京都千代田区岩本町一丁目7番1号<br>瀬木ビル3階                 | 03-3866-7313  |                                                                       | ○                  | ○                  | 内科／皮膚科                   | 瀬木 邦久                            |                                              |
| 124 | 雪月花メディカルクリニック秋葉原診療所          | 101-0021 | 東京都千代田区外神田6-14-2<br>サカイ末広ビル7階B室             | 03-5812-5301  | <a href="https://snow-moon-flower.jp">https://snow-moon-flower.jp</a> |                    | ○                  | 内科／皮膚科／アレルギー科            | 大道 雅文                            |                                              |
| 125 | 雪月花メディカルクリニック秋葉原中央通診療所       | 101-0041 | 東京都千代田区神田須田町1-7-8 秋葉原シグマビル1階                | 03-3525-8025  | <a href="https://akbcore.jp">https://akbcore.jp</a>                   | ○                  | ○                  | 内科／皮膚科／アレルギー科            | 齋藤 哲史                            |                                              |
| 126 | Sowaka women's health clinic | 102-0074 | 東京都千代田区九段南3-7-8                             | 03-6910-0753  | <a href="https://sowaka-cl.com">https://sowaka-cl.com</a>             | ○                  | ○                  | 婦人科                      | 竹元 葉                             |                                              |

電話や情報通信機器を用いて診療を実施する医療機関の一覧（東京都）

|     | 基本情報                    |          |                                         |              |                                                | 事務連絡に基づく対応について     |                    |                                                                            |                                          |                                                                                                                                    |
|-----|-------------------------|----------|-----------------------------------------|--------------|------------------------------------------------|--------------------|--------------------|----------------------------------------------------------------------------|------------------------------------------|------------------------------------------------------------------------------------------------------------------------------------|
|     | 施設名                     | 郵便番号     | 住所（都道府県から記載）                            | 電話番号         | ウェブサイトURL                                      | 初診の電話等を用いた診療の実施の有無 | 再診の電話等を用いた診療の実施の有無 | 対応診療科                                                                      | 担当医師名                                    | 対面診療が必要と判断した場合に連携する医療機関名（複数ある場合は複数、住所も併せて記載）                                                                                       |
| 127 | 竹橋クリニック                 | 101-0054 | 東京都千代田区神田錦町3-17<br>北の丸ビル1階              | 03-3295-5525 | http://takebashiclinic.jimdo.com               |                    | ○                  | 内科                                                                         | 徳永 昌子                                    | 東京通信病院（東京都千代田区富士見2-14-23）<br>九段坂病院（東京都千代田区九段南1-6-12）<br>聖路加国際病院<br>東京慈恵会医科大学附属病院                                                   |
| 128 | 帝国クリニック                 | 100-0011 | 東京都千代田区内幸町一丁目1番1号<br>帝国ホテル本館4階          | 03-3503-8681 |                                                | ○                  | ○                  | 内科                                                                         | 岩本 耕太郎                                   | 東京通信病院（東京都千代田区富士見2-14-23）<br>虎の門病院（東京都港区虎ノ門2-2-2）<br>聖路加国際病院<br>慈恵医大病院<br>日赤医療センター                                                 |
| 129 | 東京がんセンタークリニック           | 102-0072 | 東京都千代田区飯田橋一丁目3番2号<br>曙杉館ビル9階            | 03-6380-8031 | https://tokyocancerclinic.jp/                  | ○                  | ○                  | 内科                                                                         | 阿部 博幸／笹<br>田 亜麻子                         | 一般財団法人全日本労働福祉協会 九段クリニック（東京都千代田区九段北1-9-5 朝日九段マンション1階1号室）                                                                            |
| 130 | 東京クリニック                 | 100-0004 | 東京都千代田区大手町二丁目2番1号<br>新大手町ビル1階・地下1階・地下2階 | 03-3516-7151 |                                                |                    | ○                  | 内科／ペインクリニック／<br>小児科／神経内科／<br>呼吸器内科／消化器<br>内科／形成外科／美容<br>外科／皮膚科／美容<br>皮膚科／外 |                                          |                                                                                                                                    |
| 131 | 東京シーサイドクリニック            | 102-0093 | 東京都千代田区平河町2-14-7 YUKEN平河町ビル3F           | 03-6272-6616 | http://www.ts-clinic.jp/                       | ○                  | ○                  | 内科／循環器内科                                                                   | 中川敬一                                     | 東京通信病院（千代田区富士見2-14-23）<br>東京高輪病院（港区高輪3-10-11）                                                                                      |
| 132 | 東京歯科大学 水道橋病院            | 101-0061 | 東京都千代田区三崎町2-9-18                        | 03-5275-1856 | http://www.tdc.ac.jp/sh/tabid/233/Default.aspx | ○<br>（ただし、内科のみ）    | ○                  | 眼科／内科                                                                      | 【眼科】<br>太田 友香／西<br>島 有衣<br>【内科】<br>山岸 由幸 | 左記施設<br>受診不可であれば、近医に紹介状送付                                                                                                          |
| 133 | 東京都信用金庫健康保険組合診療所        | 101-8312 | 東京都千代田区神田駿河台二丁目9番地2<br>信用金庫健保会館2～4階     | 03-5280-0561 | https://www.shinkinkenpo.or.jp                 |                    | ○                  | 内科                                                                         | 藤原 啓二                                    |                                                                                                                                    |
| 134 | 東京ビジネスクリニック<br>グランスタ丸の内 | 100-0005 | 東京都千代田区丸の内一丁目9番1号<br>JR東日本東京駅構内地下1階     | 03-6259-1605 |                                                | ○                  | ○                  | 内科／外科／皮膚科<br>／小児科                                                          | 内藤 祥                                     | 聖路加国際病院（東京都中央区明石町9-1）<br>虎の門病院（東京都港区虎ノ門2-2-2）<br>慶應義塾大学病院（東京都新宿区信濃町35）<br>三井記念病院（東京都千代田区神田和泉町1）<br>東京医科歯科大学医学部附属病院（東京都文京区湯島1-5-45） |
| 135 | 東京ビジネスクリニック<br>八重洲北口    | 100-0005 | 東京都千代田区丸の内一丁目8番2号<br>鉄鋼ビルディング地下1階       | 03-6268-0079 | businessclinic.tokyo                           | ○                  | ○                  | 内科／皮膚科／<br>小児科／外科                                                          | 小野 顕人／内<br>藤 祥                           | 聖路加国際病院（東京都中央区明石町9-1）<br>慶應義塾大学病院（東京都新宿区信濃町35）<br>東京医科歯科大学医学部附属病院（東京都文京区湯島1-5-45）<br>虎の門病院（東京都港区虎ノ門2-2-2）<br>三井記念病院（東京都千代田区神田和泉町1） |

電話や情報通信機器を用いて診療を実施する医療機関の一覧（東京都）

|     | 基本情報             |          |                                         |              |                                          | 事務連絡に基づく対応について     |                    |                       |                          |                                               |
|-----|------------------|----------|-----------------------------------------|--------------|------------------------------------------|--------------------|--------------------|-----------------------|--------------------------|-----------------------------------------------|
|     | 施設名              | 郵便番号     | 住所（都道府県から記載）                            | 電話番号         | ウェブサイトURL                                | 初診の電話等を用いた診療の実施の有無 | 再診の電話等を用いた診療の実施の有無 | 対応診療科                 | 担当医師名                    | 対面診療が必要と判断した場合に連携する医療機関名（複数ある場合は複数、住所も併せて記載）  |
| 136 | 東京ビジネスパーソンスクリニック | 101-0044 | 東京都千代田区鍛冶町一丁目8番3号<br>神田91ビル1階           | 03-6206-4484 | https://tokyo-bp-clinic.com              |                    | ○                  | 内科／皮膚科                | 伊藤 諭                     | 東京通信病院（東京都千代田区富士見2-14-23）                     |
| 137 | 中田クリニック          | 100-0011 | 東京都千代田区内幸町二丁目2番1号<br>日本プレスセンタービルB1      | 03-5511-7770 |                                          |                    | ○                  | 呼吸器科                  | 中田 紘一郎                   | 東京通信病院（東京都千代田区富士見2-14-23）<br>虎の門病院<br>聖路加国際病院 |
| 138 | 日本医科大学呼吸ケアクリニック  | 102-0074 | 東京都千代田区九段南四丁目7番15号<br>JPR市ヶ谷ビル8階        | 03-5276-2325 |                                          |                    | ○                  | 呼吸器内科                 | 日野 光紀／谷内 七三子／宮永 晃彦／吉川 明子 | 日本医科大学付属病院                                    |
| 139 | 日本歯科大学附属病院       | 102-8158 | 東京都千代田区富士見2-3-16                        | 03-3261-5511 | http://dent-hosp.ndu.ac.jp/nduhosp/      |                    | ○                  | 内科<br>外科              | 全医師                      |                                               |
| 140 | 二宮内科クリニック        | 101-0044 | 東京都千代田区鍛冶町一丁目9番1号<br>第二大久保ビル3階          | 03-3254-5007 | http://ninomiya-cl.jp                    | ○                  | ○                  | 内科／リウマチ科／糖尿病内科／アレルギー科 | 高崎 千穂／山中 健次郎             |                                               |
| 141 | 原プレスセンタークリニック    | 100-0011 | 東京都千代田区内幸町二丁目2番1号<br>日本プレスセンタービルB1      | 03-3595-2961 | https://hara-pcc.net                     |                    | ○                  | 内科／腎臓内科               | 原 茂子                     | 虎の門病院                                         |
| 142 | はりまメンタルクリニック     | 101-0052 | 東京都千代田区神田小川町三丁目24番地1<br>カスターリアお茶の水102号室 | 03-5281-4800 | www.harimental.com                       |                    | ○                  | 精神科                   | 針間 克己                    |                                               |
| 143 | パレスクリニック         | 100-0003 | 東京都千代田区一ツ橋1-1-1<br>パレスサイドビル1階           | 03-3213-2855 | http://palaceclinic99.wixsite.com/gairai | ○                  | ○                  | 耳鼻咽喉科／皮膚科／眼科          | 春山 喜一                    | 順天堂大学医学部付属順天堂医院                               |
| 144 | 半蔵門のびすこどもクリニック   | 102-0082 | 東京都千代田区一番町4番地16<br>プルミエール一番町 1階         | 03-6261-7540 | https://nobisuko.jp                      | ○                  | ○                  | 小児科／児童精神科             | 河嶋 美穂／河嶋 讓               |                                               |



電話や情報通信機器を用いて診療を実施する医療機関の一覧（東京都）

|     | 基本情報                 |          |                                        |              |                                                                                         | 事務連絡に基づく対応について     |                    |          |        |                                                                                                                       |
|-----|----------------------|----------|----------------------------------------|--------------|-----------------------------------------------------------------------------------------|--------------------|--------------------|----------|--------|-----------------------------------------------------------------------------------------------------------------------|
|     | 施設名                  | 郵便番号     | 住所（都道府県から記載）                           | 電話番号         | ウェブサイトURL                                                                               | 初診の電話等を用いた診療の実施の有無 | 再診の電話等を用いた診療の実施の有無 | 対応診療科    | 担当医師名  | 対面診療が必要と判断した場合に連携する医療機関名（複数ある場合は複数、住所も併せて記載）                                                                          |
| 145 | 日比谷ガーデンクリニック         | 100-0006 | 東京都千代田区有楽町1-5-1<br>日比谷マリンビル地下2階        | 03-6206-1121 | <a href="https://www.hibiya-garden-clinic.com">https://www.hibiya-garden-clinic.com</a> | ○                  | ○                  | 心療内科／精神科 | 高橋 栄   | 左記施設                                                                                                                  |
| 146 | 広川眼科                 | 101-0044 | 東京都千代田区鍛冶町2-2-9<br>第二登栄ビル4階            | 03-3256-3839 |                                                                                         |                    | ○                  | 眼科       | 広川 正泰  |                                                                                                                       |
| 147 | ホテルニューオータニ診療所        | 102-0094 | 東京都千代田区紀尾井町4番1号<br>ホテルニューオータニ本館地下1階    | 03-3221-4154 |                                                                                         |                    | ○                  | 内科       | 山本 純子  | 東京通信病院（東京都千代田区富士見2-14-23）<br>東京慈恵会医科大学附属病院（東京都港区西新橋3-19-18）<br>九段坂病院（東京都千代田区九段南1-6-12）<br>心臓血管研究所付属病院（東京都港区西麻布3-2-19） |
| 148 | まなメンタルクリニック<br>新御茶ノ水 | 101-0063 | 東京都千代田区神田淡路町1-11-8<br>淡路町UKビル3階        | 03-3526-2613 | <a href="https://manaclinic.jp">https://manaclinic.jp</a>                               |                    | ○                  | 心療内科／精神科 | 市川 弓紀子 |                                                                                                                       |
| 149 | 丸ノ内なかごみクリニック         | 100-0005 | 東京都千代田区丸の内二丁目2番1号<br>岸本ビル2階            | 03-6551-2011 | <a href="http://marunouchi-nakagomi.com">marunouchi-nakagomi.com</a>                    |                    | ○                  | 内科／脳神経外科 | 中込 忠好  | 東京通信病院（東京都千代田区富士見2-14-23）                                                                                             |
| 150 | 丸の内の森レディースクリニック      | 100-8509 | 東京都千代田区丸の内一丁目5番1号<br>新丸の内ビルディング9階      | 03-6206-3900 |                                                                                         |                    | ○                  | 産科／婦人科   | 宋 美玄   |                                                                                                                       |
| 151 | 三木内科クリニック            | 101-0047 | 東京都千代田区内神田3-14-8 ニシザワビル1F              | 03-5298-4120 |                                                                                         |                    | ○                  | 内科       | 三木 治   |                                                                                                                       |
| 152 | 明神下青木皮膚科             | 101-0021 | 東京都千代田区外神田2-3-6<br>K I T A H A R Aビル2階 | 03-3251-3666 |                                                                                         |                    | ○                  | 皮膚科      | 青木 見佳子 |                                                                                                                       |
| 153 | 森山眼科医院               | 101-0021 | 東京都千代田区外神田三丁目13番12号                    | 03-3251-3938 |                                                                                         |                    | ○                  | 眼科       | 森山 知英郎 |                                                                                                                       |

電話や情報通信機器を用いて診療を実施する医療機関の一覧（東京都）

|     | 基本情報             |          |                                                           |              |                                 | 事務連絡に基づく対応について     |                    |          |                                                      |                                                                     |
|-----|------------------|----------|-----------------------------------------------------------|--------------|---------------------------------|--------------------|--------------------|----------|------------------------------------------------------|---------------------------------------------------------------------|
|     | 施設名              | 郵便番号     | 住所（都道府県から記載）                                              | 電話番号         | ウェブサイトURL                       | 初診の電話等を用いた診療の実施の有無 | 再診の電話等を用いた診療の実施の有無 | 対応診療科    | 担当医師名                                                | 対面診療が必要と判断した場合に連携する医療機関名（複数ある場合は複数、住所も併せて記載）                        |
| 154 | 柳下医院             | 102-0093 | 東京都千代田区平河町一丁目7番14号<br>1階                                  | 03-3261-1261 |                                 |                    | ○                  | 内科／循環器内科 | 柳下 芳樹                                                | 左記施設                                                                |
| 155 | やじまクリニック         | 102-0072 | 東京都千代田区飯田橋一丁目8番9号<br>ニューシティハイイツ飯田橋201                     | 03-3261-7853 | http://www.yajima-cl.net        | ○                  | ○                  | 内科       | 矢島 俊巳                                                | 患者に合わせて紹介                                                           |
| 156 | 山本亜希メンタルクリニック    | 102-0073 | 東京都千代田区九段北一丁目3番2号<br>大橋ビル6階                               | 03-3230-0002 | http://www.yamamotoaki.jp       |                    | ○                  | 精神科／心療内科 | 山本 亜希                                                | 東京通信病院（東京都千代田区富士見2-14-23）<br>だいたいクリニック（東京都千代田区九段南1-6-17 千代田会館1階区画B） |
| 157 | 有楽町睡眠・呼吸器内科クリニック | 100-0006 | 東京都千代田区有楽町1-7-1<br>有楽町電気ビル 北館5階                           | 03-5221-8088 | www.yurakucho-sleep.jp          | ○                  | ○                  | 内科／呼吸器内科 | 水岡賢一／赤星俊樹／遠藤大介／佐藤誠／横江琢也／関山忠孝／楠裕司／渡部良雄／岡本真一／佐藤春奈／河原照子 | 東京通信病院（東京都千代田区富士見2-14-23）                                           |
| 158 | 有楽町ビル駅前眼科        | 100-0006 | 東京都千代田区有楽町一丁目10番1号<br>有楽町ビルディング4F                         | 03-3213-2028 | http://www.yurakucho-ganka.jp   |                    | ○                  | 眼科       | 深澤 あゆみ                                               |                                                                     |
| 159 | 有楽町ビル婦人科クリニック    | 100-0006 | 東京都千代田区有楽町一丁目10番1号<br>有楽町ビル4階414区                         | 03-3214-2568 |                                 |                    | ○                  | 産婦人科     | 岡宮 育世                                                |                                                                     |
| 160 | 洋洋クリニック          | 102-0071 | 東京都千代田区富士見2-10-2<br>飯田橋グラン・ブルーム3階                         | 03-6272-3318 | http://youyouclinic.g1.xrea.com | ○                  | ○                  | 内科／小児科   | 白川 洋一                                                |                                                                     |
| 161 | リーレクリニック大手町      | 100-0004 | 東京都千代田区大手町一丁目3番2号<br>大手町カンファレンスセンター ショップ&レストラン 地下1階SB124区 | 03-5224-6672 | lireclinic.com                  | ○                  | ○                  | 内科       | 片山 泰輔                                                | 慶應義塾大学病院<br>東京医科歯科大学医学部付属病院                                         |
| 162 | 六番町耳鼻咽喉科         | 102-0085 | 東京都千代田区六番町3番地1<br>協和ビル3階                                  | 03-3222-4133 |                                 |                    | ○                  | 耳鼻咽喉科    | 湯浅 貴文                                                | 東京通信病院（東京都千代田区富士見2-14-23）                                           |

電話や情報通信機器を用いて診療を実施する医療機関の一覧（東京都）

|     | 基本情報                            |          |                                  |              |                                  | 事務連絡に基づく対応について     |                    |                         |                                                             |                                              |
|-----|---------------------------------|----------|----------------------------------|--------------|----------------------------------|--------------------|--------------------|-------------------------|-------------------------------------------------------------|----------------------------------------------|
|     | 施設名                             | 郵便番号     | 住所（都道府県から記載）                     | 電話番号         | ウェブサイトURL                        | 初診の電話等を用いた診療の実施の有無 | 再診の電話等を用いた診療の実施の有無 | 対応診療科                   | 担当医師名                                                       | 対面診療が必要と判断した場合に連携する医療機関名（複数ある場合は複数、住所も併せて記載） |
| 163 | 医療法人社団 久響会<br>あいクリニック神田         | 101-0047 | 東京都千代田区内神田3-14-8<br>ニシザワビル5階     | 03-3253-2100 | http://www.i-clinic.or.jp        |                    | ○                  | 精神科<br>心療内科             | 鬼頭諭<br>西松能子<br>野村俊明<br>齊藤卓弥<br>太田直子<br>角田ひとみ<br>金吉晴<br>岩崎康孝 |                                              |
| 164 | 山王クリニック                         | 100-6125 | 東京都千代田区永田町2-11-1<br>山王パークタワー25階  | 03-3580-5001 | https://www.sannoclinic.jp/      | ○                  | ○                  | 内科、精神科、<br>皮膚科、循環器<br>科 | 鈴木 努                                                        |                                              |
| 165 | 富士見スキンクリニック<br>飯田橋              | 102-0071 | 東京都千代田区富士見2-11-10-B1F            | 03-6261-7366 | https://www.fujimiskin.com/      | ○                  | ○                  | 皮膚科<br>美容皮膚科<br>アレルギー科  | 小淵 英里<br>吉原 有希<br>仲 沙耶香                                     | 当院                                           |
| 166 | お茶の水耳鼻咽喉科・<br>アレルギー科            | 101-0062 | 東京都千代田区神田駿河台2-10-6VORT御茶ノ水2<br>階 | 03-5843-9226 | https://ochanomizu-ent.com/      | ○                  | ○                  | 耳鼻咽喉科<br>アレルギー科         | 吉田 千栄子                                                      |                                              |
| 167 | 出版健康保険組合診療所                     | 101-0062 | 東京都千代田区神田駿河台1-7                  | 03-3292-5092 | https://www.phia.or.jp           |                    | ○                  | 内科                      | 松岡 美佳                                                       |                                              |
| 168 | 有明こどもクリニック勝<br>どき院              | 104-0054 | 東京都中央区勝どき3-5-5AIP勝どき駅前ビル3階       | 03-3533-7281 | https://child-clinic.or.jp       | ○                  | ○                  | 小児科 内科                  | 中本 祐樹                                                       |                                              |
| 169 | (医) 慶友 慶友銀座クリニッ<br>ク            | 104-0045 | 東京都中央区築地1-13-11 高橋ビル2F           | 03-3542-3387 | https://www.ginzaclinic.com/     | ○                  | ○                  | 耳鼻咽喉科内科                 | 大場俊彦 全勤<br>務医                                               | 東京都済生会中央病院（東京都港区三田1-4-17）                    |
| 170 | (医) 八丁堀医院                       | 104-0032 | 東京都中央区八丁堀 2-20-8 八丁堀線通ビ<br>ル9F   | 03-3551-8860 | https://www.hatchobori-iin.com   | ○                  | ○                  | 内科                      | 里井 豊                                                        | 聖路加国際病院（東京都中央区）                              |
| 171 | 医療法人オーク会<br>オーク銀座レディースク<br>リニック | 104-0061 | 東京都中央区銀座2-6-12 Okura House7階     | 0120-009-345 | https://www.oakclinic-group.com/ | ○                  | ○                  | 産科・婦人科                  | 全医師                                                         |                                              |

電話や情報通信機器を用いて診療を実施する医療機関の一覧（東京都）

|     | 基本情報                               |          |                                       |              |                                               | 事務連絡に基づく対応について     |                    |                                                      |                                                                      |                                                                                                                                                                                                                 |
|-----|------------------------------------|----------|---------------------------------------|--------------|-----------------------------------------------|--------------------|--------------------|------------------------------------------------------|----------------------------------------------------------------------|-----------------------------------------------------------------------------------------------------------------------------------------------------------------------------------------------------------------|
|     | 施設名                                | 郵便番号     | 住所（都道府県から記載）                          | 電話番号         | ウェブサイトURL                                     | 初診の電話等を用いた診療の実施の有無 | 再診の電話等を用いた診療の実施の有無 | 対応診療科                                                | 担当医師名                                                                | 対面診療が必要と判断した場合に連携する医療機関名（複数ある場合は複数、住所も併せて記載）                                                                                                                                                                    |
| 172 | 医療法人社団医成会<br>銀座さわだ内科クリニック          | 104-0061 | 東京都中央区銀座5-9-15銀座清月堂ビル4階               | 03-3572-4898 | http://iseikai-med.or.jp/                     | ○                  | ○                  | 内科<br>消化器内科                                          | 澤田 秀雄<br>澤田 貴志                                                       |                                                                                                                                                                                                                 |
| 173 | 医療法人社団健育会<br>石川島記念病院               | 104-0051 | 東京都中央区佃二丁目5番2号                        | 03-3532-3201 | https://ishikawajima.gr.jp/                   |                    | ○                  | 内科<br>整形外科                                           | 全医師                                                                  |                                                                                                                                                                                                                 |
| 174 | 医療法人社団頌栄会 上<br>田診療所                | 103-0027 | 東京都中央区日本橋2-1-10柳屋ビル地下1回               | 03-3271-2775 | https://www.ueda.com                          |                    | ○                  | 内科<br>小児科                                            | 上田 晃<br>志村 右子                                                        |                                                                                                                                                                                                                 |
| 175 | 医療法人社団スリープク<br>リニック<br>スリープクリニック銀座 | 104-0061 | 東京都中央区銀座3-8-10銀座朝日ビル8階                | 03-554-7700  | https://www.sleepmedicine-<br>tokyo.com/      |                    | ○                  | 精神科<br>心療内科                                          | 当日の担当医                                                               |                                                                                                                                                                                                                 |
| 176 | 医療法人社団 玉寄クリ<br>ニック                 | 103-0013 | 東京都中央区日本橋人形町1-12-11リガーレ日本<br>橋人形町105号 | 03-3661-5555 | https://tamayose-cl.jp                        | ○                  | ○                  | 内科、糖尿病内<br>科、小児科                                     | 玉寄兼治<br>玉寄皓大                                                         |                                                                                                                                                                                                                 |
| 177 | 医療法人社団千秋双葉会<br>日本橋茅場町耳鼻咽喉科         | 103-0025 | 東京都中央区日本橋茅場町2-8-10碧山ビル3階              | 03-3669-2085 | http://www.nihonbashi-<br>ent.com/sp/         |                    | ○                  | 耳鼻咽喉科                                                | 植草康浩                                                                 | 日本大学病院（〒101-8309 東京都千代田区神田駿河台<br>1-6）三井記念病院（〒101-8643 東京都千代田区神田和<br>泉町1番地）                                                                                                                                      |
| 178 | 医療法人社団進興会<br>東京ダイヤビルクリニッ<br>ク      | 104-0033 | 東京都中央区新川1-28-25<br>東京ダイヤビルディング3号館1階   | 03-3551-7737 | https://www.daiya-clinic.jp/                  | ○                  | ○                  | 内科<br>消化器内科<br>呼吸器科<br>循環器科<br>禁煙治療<br>婦人科<br>男性専門治療 | 川村 洋<br>細井広子、野田<br>泰弘、山田康<br>嗣、川村 洋<br>渡邊寛代<br>陣内恵美子<br>川村 洋<br>田繪綾野 | 日本大学病院（〒101-8309 東京都千代田区神田駿河台1-<br>6）<br>聖路加国際病院（101-8560東京都中央区明石町9-1）<br>（公財）心臓血管研究所附属病院（106-0031東京都港区西<br>麻布3-2-19）<br>浜松町ハマサイトクリニック（〒105-0022 東京都港区海<br>岸1-2-20 汐留ビルディング2F）<br>国立がん研究センター中央病院（104-0045東京都中央区 |
| 179 | 医療法人社団桃仁日本橋<br>レディースクリニック          | 103-0022 | 東京都中央区日本橋室町1-5-2 8階                   | 03-3516-3150 | http://www.nl-clinic.jp                       |                    | ○                  | 胃腸科<br>肛門科                                           | 野澤真木子                                                                |                                                                                                                                                                                                                 |
| 180 | 医療法人社団 平郁会<br>日本橋かきがら町<br>クリニック    | 103-0014 | 東京都中央区日本橋蛸殻町1丁目10-4 宮田ビル2<br>階        | 03-5651-1361 | http://www.heiikukai.com/clini<br>c/kakigara/ | ○                  | ○                  | 内科<br>小児科                                            | 鴈野 上田<br>深井                                                          |                                                                                                                                                                                                                 |

電話や情報通信機器を用いて診療を実施する医療機関の一覧（東京都）

|     | 基本情報                           |          |                                          |              |                                     | 事務連絡に基づく対応について     |                    |                                                  |              |                                                   |
|-----|--------------------------------|----------|------------------------------------------|--------------|-------------------------------------|--------------------|--------------------|--------------------------------------------------|--------------|---------------------------------------------------|
|     | 施設名                            | 郵便番号     | 住所（都道府県から記載）                             | 電話番号         | ウェブサイトURL                           | 初診の電話等を用いた診療の実施の有無 | 再診の電話等を用いた診療の実施の有無 | 対応診療科                                            | 担当医師名        | 対面診療が必要と判断した場合に連携する医療機関名（複数ある場合は複数、住所も併せて記載）      |
| 181 | 医療法人社団墨水会<br>浜町センタービルクリ<br>ニック | 103-0007 | 東京都中央区日本橋浜町2-31-1                        | 03-3664-6858 | http://hamacho-cc.or.jp/            |                    | ○                  | 内科<br>外科<br>消化器科<br>循環器科<br>呼吸器科<br>糖尿病科<br>脳神経科 | 窪田徳光<br>木村暢孝 |                                                   |
| 182 | 医療法人社団 わたなべ<br>こどもクリニック        | 104-0052 | 東京都中央区月島1-8-1アイ・マークタワー202                | 03-5548-2511 | http://www.watanabe-kodomo.jp       |                    | ○                  | 小児科                                              | 渡邊浩志         |                                                   |
| 183 | 医)リゾーム慶和会<br>ザ東京タワーズクリニ<br>ック  | 104-0054 | 東京都中央区勝どき6-3-2-102                       | 03-3534-9002 | http://www.thetowers.jp             | ○                  | ○                  | 内科                                               | 矢野芳和<br>矢野宏行 |                                                   |
| 184 | EASE女性のクリニッ<br>ク               | 104-042  | 東京都中央区入船1-1-24 5F                        | 03-3206-1112 | https://ease-clinic.jp              | ○                  | ○                  | 産科<br>婦人科<br>女性内科                                | 丸山 真理子       |                                                   |
| 185 | Wi clinic 銀座院                  | 104-0061 | 東京都中央区銀座8-9-16長崎センタービル9階                 | 0120-684-998 | https://wi-clinic.com/              | ○                  | ○                  | 美容皮膚科・皮<br>膚科                                    | 秋田 護         | 東京美容医療クリニック（東京都豊島区南池袋1-23-11池袋ブロンズビル10階           |
| 186 | AGクリニック銀座                      | 104-0061 | 東京都中央区銀座4-10-1 HOLON-GINZA 4階            | 13-6278-8112 | https://ginza-ginginclinic.com      | ○                  | ○                  | 泌尿器科<br>皮膚科                                      | 乙供 太郎        | 東京腎泌尿器センター大和病院（東京都板橋区本町36-3）聖路加国際病院（東京都中央区明石町9-1） |
| 187 | おりたメンタルクリニッ<br>ク               | 103-0011 | 東京都中央区日本橋大伝馬町13-8 メディカルプ<br>ライム日本橋小伝馬町8F | 03-5614-0756 | https://orita-mental.com/           | ○                  | ○                  | 心療内科 精神<br>科                                     | 織田 宗太郎       |                                                   |
| 188 | 勝どきウィメンズクリ<br>ニック              | 104-0054 | 東京都中央区勝どき2-10-4宮野海運ビル4F                  | 03-3536-7723 | http://www.kachidoki-<br>women.com/ | ○                  | ○                  | 産婦人科                                             | 松葉 悠子        |                                                   |
| 189 | 勝どき小平眼科                        | 104-0054 | 東京都中央区勝どき1-8-1-213                       | 03-5547-8010 | http://www.kachidoki-ganka.com      |                    | ○                  | 眼科                                               | 小平奈利         |                                                   |

電話や情報通信機器を用いて診療を実施する医療機関の一覧（東京都）

|     | 基本情報               |              |                                    |              |                                     | 事務連絡に基づく対応について     |                    |                           |                                 |                                              |
|-----|--------------------|--------------|------------------------------------|--------------|-------------------------------------|--------------------|--------------------|---------------------------|---------------------------------|----------------------------------------------|
|     | 施設名                | 郵便番号         | 住所（都道府県から記載）                       | 電話番号         | ウェブサイトURL                           | 初診の電話等を用いた診療の実施の有無 | 再診の電話等を用いた診療の実施の有無 | 対応診療科                     | 担当医師名                           | 対面診療が必要と判断した場合に連携する医療機関名（複数ある場合は複数、住所も併せて記載） |
| 190 | 勝どき脳神経外科           | 104-0054     | 東京都中央区勝どき3-5-5 AIP勝どき駅前ビル3F        | 03-6204-9911 | http://kachidokineurosurgery.jp     |                    | ○                  | 脳神経外科                     | 藤塚光幸                            |                                              |
| 191 | 神谷町スキンケアクリニック      | 105-0001     | 東京都港区虎ノ門5-13-7虎ノ門A&K-1Pビル2F        | 03-5777-1102 | http://kamiyacho-skinicare.jp/      | ○                  | ○                  | 皮膚科                       | 太田 美佳                           |                                              |
| 192 | 亀田京橋クリニック          | 104-0031     | 東京都中央区京橋三丁目1番1号<br>東京スクエアガーデン4階・6階 | 0570-018-000 | http://www.kameda-kyobashi.com      |                    | ○                  | 内科                        | 金子 教宏<br>郭 友輝<br>難波 雄亮<br>吉澤 瑛子 | 亀田総合病院（千葉県鴨川市東町929）<br>亀田クリニック（千葉県鴨川市東町1344） |
| 193 | 茅場町パークサイドクリニック     | 103-0025     | 東京都中央区日本橋茅場町2-2-1東石ビル1階            | 03-3666-2212 | https://www.dr-sakurai.com/         |                    | ○                  | 内科                        | 櫻井達也                            |                                              |
| 194 | 銀座スキンクリニック         | 104-0061     | 東京都中央区銀座3-3-14銀座グランディアビル3階         | 0120-4103-53 | https://www.ginzaskin.com           | ○                  | ○                  | 皮膚科<br>美容皮膚科              | 坪内利江子                           |                                              |
| 195 | 銀座すずらん通りレディースクリニック | 104-0061     | 東京都中央区銀座6-9-7近畿建物銀座ビル8階            | 03-3569-7711 | www.huninsho.com                    |                    | ○                  | 産婦人科                      | 小野美央子                           |                                              |
| 196 | 銀座並木通りクリニック        | 104-0061     | 東京都中央区銀座4-2-2 第1弥生ビル7F             | 03-3562-7773 | https://www.ginzanamiki-clinic.com/ | ○                  | ○                  | 内科<br>脳神経外科               | 三好立<br>丸山隆志                     |                                              |
| 197 | 銀座ハートクリニック         | 03-5148-3921 | 東京都中央区銀座8-16-5銀座中央ビル1F             | 03-5148-3921 | https://ginza-heart.com             |                    | ○                  | 内科 循環器内科<br>心臓血管外科<br>小児科 | 永瀬裕三                            | 聖路加国際病院（東京都中央区明石町9-1）                        |
| 198 | 銀座富士クリニック          | 104-0061     | 東京都中央区銀座4-11-2 丸正ビル2階              | 03-3542-8371 | http://ginzafuji.com/               |                    | ○                  | 内科                        | 田所 賢也                           |                                              |

電話や情報通信機器を用いて診療を実施する医療機関の一覧（東京都）

|     | 基本情報                     |          |                            |              |                                                                                                 | 事務連絡に基づく対応について     |                    |                       |                     |                                              |
|-----|--------------------------|----------|----------------------------|--------------|-------------------------------------------------------------------------------------------------|--------------------|--------------------|-----------------------|---------------------|----------------------------------------------|
|     | 施設名                      | 郵便番号     | 住所（都道府県から記載）               | 電話番号         | ウェブサイトURL                                                                                       | 初診の電話等を用いた診療の実施の有無 | 再診の電話等を用いた診療の実施の有無 | 対応診療科                 | 担当医師名               | 対面診療が必要と判断した場合に連携する医療機関名（複数ある場合は複数、住所も併せて記載） |
| 199 | 銀座よしえクリニック銀座二丁目院         | 104-0061 | 東京都中央区銀座2-5-11 V88ビルディング5階 | 0120-398-885 | <a href="https://www.ginzabiyou.com/">https://www.ginzabiyou.com/</a>                           | ○                  | ○                  | 皮膚科<br>美容皮膚科          | 担当医                 |                                              |
| 200 | 銀座よしえクリニック銀座本院           | 104-0061 | 東京都中央区銀座6-9-8銀座UKビル4F      | 0120-398-885 | <a href="https://www.ginzabiyou.com/">https://www.ginzabiyou.com/</a>                           | ○                  | ○                  | 皮膚科<br>美容皮膚科          | 担当医                 |                                              |
| 201 | 銀座レンガ通りクリニック             | 104-0061 | 東京都中央区銀座1-6-16銀座1616ビル4階   | 03-3535-2280 | <a href="http://ginza-rengadori.com/">http://ginza-rengadori.com/</a>                           | ○                  | ○                  | 心療内科<br>精神科<br>内科     | 臼井 幸治               |                                              |
| 202 | 公益財団法人朝日生命成人病研究所附属医院     | 103-0002 | 東京都中央区日本橋馬喰町2-2-6朝日生命須長ビル  | 03-3639-5501 | <a href="https://asahi-life.or.jp">https://asahi-life.or.jp</a>                                 |                    | ○                  | 糖尿病内科・循環器内科・消化器内科     | 各医師                 |                                              |
| 203 | 公益財団法人早期胃癌検診協会附属茅場町クリニック | 103-0025 | 東京都中央区日本橋茅場町2-6-12         | 03-3668-6800 | <a href="http://www.soiken.or.jp">http://www.soiken.or.jp</a>                                   |                    | ○                  | 内科<br>消化器内科           | 各医師                 |                                              |
| 204 | 呼吸ケアクリニック東京              | 104-0031 | 東京都中央区京橋1-12-5 京橋YSビル1階    | 03-6263-2143 | <a href="https://www.rcc-icr.com/">https://www.rcc-icr.com/</a>                                 |                    | ○                  | 呼吸器内科<br>内科<br>アレルギー科 | 木田厚瑞・茂木孝・平松久弥子・森井恵子 | 聖路加国際病院（東京都中央区明石町9-1）                        |
| 205 | 国立がん研究センター中央病院           | 104-0045 | 東京都中央区築地5-1-1              | 03-3542-2511 | <a href="https://www.ncc.go.jp/jp/ncch/index.html">https://www.ncc.go.jp/jp/ncch/index.html</a> |                    | ○                  | 概ね全診療科                | 特定していない             |                                              |
| 206 | 小坂こども元気クリニック             | 104-0052 | 東京都中央区月島3-30-3ベルウッドビル2~4階  | 03-5547-1191 | <a href="http://e-kosaka.jp/">http://e-kosaka.jp/</a>                                           | ○                  | ○                  | 小児科 アレルギー科<br>内科      | 小坂 和輝               | 聖路加国際病院（東京都中央区明石町9-1）                        |
| 207 | さいとう内科・循環器クリニック          | 103-0011 | 東京都中央区日本橋大伝馬町13-8-3F       | 03-3639-3110 | <a href="https://saito-heart.com/">https://saito-heart.com/</a>                                 | ○                  | ○                  | 内科<br>循環器内科<br>糖尿病内科  | 齋藤 幹                |                                              |

電話や情報通信機器を用いて診療を実施する医療機関の一覧（東京都）

|     | 基本情報                 |          |                                    |              |                                                                                       | 事務連絡に基づく対応について     |                    |                                                         |                 |                                                     |
|-----|----------------------|----------|------------------------------------|--------------|---------------------------------------------------------------------------------------|--------------------|--------------------|---------------------------------------------------------|-----------------|-----------------------------------------------------|
|     | 施設名                  | 郵便番号     | 住所（都道府県から記載）                       | 電話番号         | ウェブサイトURL                                                                             | 初診の電話等を用いた診療の実施の有無 | 再診の電話等を用いた診療の実施の有無 | 対応診療科                                                   | 担当医師名           | 対面診療が必要と判断した場合に連携する医療機関名（複数ある場合は複数、住所も併せて記載）        |
| 208 | 白倉内科診療所              | 104-0061 | 東京都中央区銀座 4-13-18 医療ビル1階            | 03-3543-4361 | <a href="https://www.hankeikai.com/">https://www.hankeikai.com/</a>                   |                    | ○                  | 内科                                                      | 吉田 範子           |                                                     |
| 209 | シロノクリニック銀座           | 104-0061 | 東京都中央区銀座2-2-2<br>ヒューリック西銀座ビル4F     | 0120-99-7474 | <a href="https://www.shirono-ginza.net/">https://www.shirono-ginza.net/</a>           | ○                  | ○                  | 美容皮膚科                                                   | 徳永 真理<br>笠井 美貴子 |                                                     |
| 210 | 豊海診療所                | 104-0055 | 東京都中央区豊海町2-2-113                   | 03-3533-6751 |                                                                                       | ○                  | ○                  | 内科                                                      | 矢野芳和            |                                                     |
| 211 | 水天宮いきいきクリニック内科・呼吸器内科 | 151-0053 | 東京都中央区日本橋蛸殻町1-29-6 水天宮前東急ビル2階      | 03-3665-1159 | <a href="http://iki-iki.jp">http://iki-iki.jp</a>                                     |                    | ○                  | 内科<br>呼吸器内科                                             | 宮本 優美           |                                                     |
| 212 | 鈴木整形外科               | 104-0042 | 東京中央区入船1-2-8-310                   | 03-3553-5967 | <a href="http://suzuki-seke.byoinnavi.jp/pc/">http://suzuki-seke.byoinnavi.jp/pc/</a> | ○                  | ○                  | 整形外科                                                    | 鈴木 秀和           |                                                     |
| 213 | 聖路加国際病院              | 104-8560 | 東京都中央区明石町9-1                       | 03-3541-5151 | <a href="http://hospital.luke.ac.jp/">http://hospital.luke.ac.jp/</a>                 |                    | ○                  | 呼吸器外科、呼吸器内科、感染症科、皮膚科、神経内科、脳神経外科、神経血管内治療科、整形外科、アレルギー・膠原病 | 各医師             |                                                     |
| 214 | 月島シーサイドクリニック         | 104-0051 | 東京都中央区佃2-20-5<br>月島医療ステーションB1F, 1F | 03-6228-2234 | <a href="https://tsukishima.clinic/">https://tsukishima.clinic/</a>                   | ○                  | ○                  | 内科                                                      | 保阪 政樹           | 聖路加国際病院（東京都中央区明石町9-1）<br>昭和大学江東豊洲病院（東京都江東区豊洲5-1-38） |
| 215 | たいようクリニック八重洲院        | 104-0028 | 東京都中央区八重洲2丁目6-21 三徳八重洲ビル4階         | 03-6265-1667 | <a href="https://home.sun-cl.jp/">https://home.sun-cl.jp/</a>                         | ○                  | ○                  | 泌尿器科                                                    | 野口 真康           |                                                     |
| 216 | 高橋医院                 | 104-0032 | 東京都中央区八丁堀3-26-8 高橋ビル1階             | 03-3551-5955 | <a href="https://hatchobori.jp/">https://hatchobori.jp/</a>                           |                    | ○                  | 内科                                                      | 高橋友乃<br>高橋宏樹    | 聖路加国際病院（東京都中央区明石町9-1）                               |



電話や情報通信機器を用いて診療を実施する医療機関の一覧（東京都）

|     | 基本情報                  |          |                                 |              |                                    | 事務連絡に基づく対応について     |                    |                                         |                              |                                                                                               |
|-----|-----------------------|----------|---------------------------------|--------------|------------------------------------|--------------------|--------------------|-----------------------------------------|------------------------------|-----------------------------------------------------------------------------------------------|
|     | 施設名                   | 郵便番号     | 住所（都道府県から記載）                    | 電話番号         | ウェブサイトURL                          | 初診の電話等を用いた診療の実施の有無 | 再診の電話等を用いた診療の実施の有無 | 対応診療科                                   | 担当医師名                        | 対面診療が必要と判断した場合に連携する医療機関名（複数ある場合は複数、住所も併せて記載）                                                  |
| 217 | 武田クリニック東銀座診療所         | 104-0045 | 東京都中央区築地1-12-22 コンワビル4階         | 03-3542-4881 | https://higagin.jp/                | ○                  | ○                  | 糖尿病内科                                   | 遠藤 温子<br>山本 貴子               |                                                                                               |
| 218 | 対馬ルリ子<br>女性ライフクリニック銀座 | 104-0061 | 東京都中央区銀座2-6-5 銀座トレスヤス7F         | 03-3538-0270 | http://w-wellness.com/ginza/       | ○                  | ○                  | 婦人科                                     | 対馬ルリ子                        |                                                                                               |
| 219 | 東京心臓血管・内科クリニック        | 103-0013 | 東京都中央区日本橋人形町1-7-7 笠原ビルディング3階    | 03-5641-1177 | https://shinzo-kekkan.clinic/      | ○                  | ○                  | 循環器内科<br>内科                             | 柴山 謙太郎<br>堀内 優               |                                                                                               |
| 220 | 東京ひざ関節症クリニック銀座院       | 104-0061 | 東京都中央区銀座5-3-12 壹番館ビル 7F         | 0120-013-712 | https://www.knee-joint.net/clinic/ | ○                  | ○                  | 整形外科                                    | 輿石 暁<br>八代 忍                 |                                                                                               |
| 221 | 内科総合クリニック人形町          | 103-0013 | 東京都中央区日本橋人形町1丁目6-10 ユニコム人形町ビル1階 | 03-5843-6714 | https://ningyocho-cl.com/          | ○                  | ○                  | 内科                                      | 藤田 英理                        | 三井記念病院（東京都千代田区神田和泉町1番地）<br>聖路加国際病院（東京都中央区明石町9-1）<br>東京大学医学部付属病院（東京都文京区本郷7-3-1）<br>メディカルスキヤニング |
| 222 | 中込眼科                  | 104-0033 | 東京都中央区新川2-2-2-6 SJ1ビル5階         | 03-5542-5267 | https://nakagomiganka.com          |                    | ○                  | 眼科                                      | 中込 豊                         |                                                                                               |
| 223 | 日本橋えがわクリニック           | 103-0028 | 東京都中央区八重洲1-1-3寿ビル2階             | 03-5204-0311 | https://nihonbashi-egawacl.com/    | ○                  | ○                  | 内科<br>整形外科                              | 穎川一忠<br>二見一美<br>二見一平<br>根岸道子 | 聖路加国際病院（東京都中央区明石町9-1）<br>慈恵会医科大学病院（東京都港区西新橋3-19-18）<br>順天堂医院（東京都文京区本郷3-1-3）                   |
| 224 | 日本橋カワマタ内科クリニック        | 103-0006 | 東京都中央区日本橋富沢町10-18-1階            | 03-3669-2626 | kawamata-cl.com/                   | ○                  | ○                  | 内科<br>循環器科<br>糖尿病                       | 川俣博文                         |                                                                                               |
| 225 | 日本橋・重田クリニック           | 103-0022 | 東京都中央区日本橋室町4-2-1 3-5F           | 03-3241-4045 |                                    |                    | ○                  | 内科<br>胃腸科<br>消化器科<br>皮膚科<br>泌尿器科<br>肛門科 | 重田 博                         |                                                                                               |

電話や情報通信機器を用いて診療を実施する医療機関の一覧（東京都）

|     | 基本情報                  |          |                                          |              |                                                                                       | 事務連絡に基づく対応について     |                    |                           |                 |                                                |
|-----|-----------------------|----------|------------------------------------------|--------------|---------------------------------------------------------------------------------------|--------------------|--------------------|---------------------------|-----------------|------------------------------------------------|
|     | 施設名                   | 郵便番号     | 住所（都道府県から記載）                             | 電話番号         | ウェブサイトURL                                                                             | 初診の電話等を用いた診療の実施の有無 | 再診の電話等を用いた診療の実施の有無 | 対応診療科                     | 担当医師名           | 対面診療が必要と判断した場合に連携する医療機関名（複数ある場合は複数、住所も併せて記載）   |
| 226 | 日本橋内科・アレルギー科クリニック     | 103-0022 | 東京都中央区日本橋室町2-4-3日本橋室町野村ビル7階              | 03-3274-4159 | <a href="http://www.nohonbashi-allergy.jp">http://www.nohonbashi-allergy.jp</a>       |                    | ○                  | 内科<br>アレルギー科<br>呼吸器内科     | 竹内聡美            | 聖路加国際病院（東京都中央区明石町9-1）<br>三井記念病院（東京都千代田区神田和泉町1） |
| 227 | 日本橋浜町耳鼻咽喉科            | 103-0007 | 東京都中央区日本橋浜町3-25-10 日本橋浜町ポストビル3F          | 03-6661-6088 | <a href="http://hamacho-ent.com">http://hamacho-ent.com</a>                           | ○                  | ○                  | 耳鼻咽喉科                     | 許 芳行            |                                                |
| 228 | 日本橋馬喰町クリニック           | 103-0002 | 東京都中央区日本橋馬喰町1-6-1<br>JU SKY TOWER 日本橋 3F | 03-5843-6275 | <a href="http://www.nb-clinic.jp/">http://www.nb-clinic.jp/</a>                       |                    | ○                  | 内科<br>糖尿病内科               | 中西 静佳           |                                                |
| 229 | 日本橋室町三井タワーミッドタウンクリニック | 103-0022 | 東京都中央区日本橋室町3-2-1日本橋室町三井タワー7階             | 03-3231-2071 | <a href="https://www.mtc-nihonbashi.jp">https://www.mtc-nihonbashi.jp</a>             | ○                  |                    | 内科                        | 畑 啓介            | 三井記念病院（東京都千代田区神田和泉町1）                          |
| 230 | 日本橋むらやまクリニック          | 103-0004 | 東京都中央区東日本橋1-1-4                          | 03-3851-2473 | <a href="https://www.junseikai-nmc.or.jp/">https://www.junseikai-nmc.or.jp/</a>       | ○                  | ○                  | 内科<br>整形外科<br>麻酔科         | 村山 清之<br>土居 真太郎 |                                                |
| 231 | 人形町子どもクリニック           | 103-0014 | 東京都中央区日本橋蛸殻町1-9-1 アポテックビル1階              | 03-3669-2828 | <a href="https://tsubasa-cello-trimboli.com/">https://tsubasa-cello-trimboli.com/</a> | ○                  | ○                  | 小児科                       | 田中 翼            | 当院に通院できる範囲での診療に限ります                            |
| 232 | 人形町メンタルクリニック          | 103-0013 | 東京都中央区日本橋人形町1-1-21人形町ビル3F                | 03-5614-7087 | <a href="http://www.cocoro-support.com/">http://www.cocoro-support.com/</a>           |                    | ○                  | 精神科<br>心療内科               | 勝 久寿            |                                                |
| 233 | 晴海3丁目クリニック            | 104-0053 | 東京都中央区晴海3-10-1 1F                        | 03-3536-8633 | <a href="https://www.harumi3-cl.jp/">https://www.harumi3-cl.jp/</a>                   | ○                  | ○                  | 内科 消化器内科<br>胃腸内科<br>内視鏡内科 | 平野 直樹           | 昭和大学江東豊洲病院 聖路加国際病院                             |
| 234 | 晴海トリトン 夢未来クリニック       | 104-0053 | 東京都中央区晴海1-8-16晴海トリトンスクエア3F               | 03-3536-1361 | <a href="https://yumemirai-clinic.net/">https://yumemirai-clinic.net/</a>             | ○                  | ○                  | 内科、アレルギー科                 | 望月 さやか          | 聖路加国際病院<br>昭和大学江東豊洲病院                          |

電話や情報通信機器を用いて診療を実施する医療機関の一覧（東京都）

|     | 基本情報                |          |                            |              |                                                                                 | 事務連絡に基づく対応について     |                    |            |                                 |                                                     |
|-----|---------------------|----------|----------------------------|--------------|---------------------------------------------------------------------------------|--------------------|--------------------|------------|---------------------------------|-----------------------------------------------------|
|     | 施設名                 | 郵便番号     | 住所（都道府県から記載）               | 電話番号         | ウェブサイトURL                                                                       | 初診の電話等を用いた診療の実施の有無 | 再診の電話等を用いた診療の実施の有無 | 対応診療科      | 担当医師名                           | 対面診療が必要と判断した場合に連携する医療機関名（複数ある場合は複数、住所も併せて記載）        |
| 235 | 久松町まつうらクリニック        | 103-0005 | 東京都中央区日本橋久松町10-8 2F        | 03-6661-0024 | <a href="https://www.matsuura-cl.net">https://www.matsuura-cl.net</a>           | ○                  | ○                  | 内科 外科      | 松浦 裕史                           |                                                     |
| 236 | プライベートケアクリニック東京 東京院 | 103-0027 | 東京都中央区日本橋2-2-2マルヒロ日本橋ビル4F  | 03-5255-6611 | <a href="https://pcct.jp/">https://pcct.jp/</a>                                 | ○                  | ○                  | 性感染症内科     | 吉田 直人<br>三須 恵太<br>山本 藍<br>小堀 善友 |                                                     |
| 237 | ヘルス・マネジメント・クリニック    | 104-0028 | 東京都中央区八重洲2-1-1-2 城辺橋ビル1階   | 03-6271-8971 | <a href="http://hmclinic-tokyo.org">http://hmclinic-tokyo.org</a>               | ○                  | ○                  | 内科<br>小児科  | 行松 伸成                           |                                                     |
| 238 | みらいクリニック            | 103-0001 | 東京都中央区日本橋小伝馬町9-6-3 松村ビル3階  | 03-3663-3366 | <a href="https://mirai-clinic.org">https://mirai-clinic.org</a>                 | ○                  | ○                  | 内科         | 酒井 文彦                           |                                                     |
| 239 | 人形町まつだ耳鼻咽喉科         | 103-0013 | 東京都中央区日本橋人形町2-2-3アライブ人形町2F | 03-6264-9762 | <a href="http://ningyocho-matsuda-ent.com">http://ningyocho-matsuda-ent.com</a> | ○                  | ○                  | 耳鼻咽喉科      | 松田雄大                            | 三井記念病院                                              |
| 240 | みんなの内科クリニック 人形町・水天宮 | 103-0013 | 東京都中央区日本橋人形町2-2-3アライブ人形町6階 | 03-3668-2200 | <a href="https://minnano-naika.com">https://minnano-naika.com</a>               | ○                  | ○                  | 内科<br>腎臓内科 | 谷津 圭介                           |                                                     |
| 241 | 八重洲大島眼科             | 104-0028 | 東京都中央区八重洲2-1八重洲地下街         | 03-6262-3996 | <a href="http://www.yaesuoshima.com/">http://www.yaesuoshima.com/</a>           |                    | ○                  | 眼科         | 岡島 修                            |                                                     |
| 242 | 八重洲形成外科・美容皮膚科       | 103-0027 | 東京都中央区日本橋3丁目4-14八重洲N3ビル4階  | 03-6265-1981 | <a href="http://yaesukeisei.com/">http://yaesukeisei.com/</a>                   | ○                  | ○                  | 形成外科・皮膚科   | 原かや                             |                                                     |
| 243 | 八重洲街診療所             | 103-0027 | 東京都中央区日本橋2-2-20 日本橋仲通りビル3階 | 03-3271-1828 | <a href="http://www.yaesugai.msn.gr.jp/">http://www.yaesugai.msn.gr.jp/</a>     |                    | ○                  | 内科<br>泌尿器科 | 藤沢 民                            | 昭和大学江東豊洲病院（東京都江東区豊洲5-1-38）<br>聖路加国際病院（東京都中央区明石町9-1） |

電話や情報通信機器を用いて診療を実施する医療機関の一覧（東京都）

|     | 基本情報               |          |                                   |              |                                                                           | 事務連絡に基づく対応について     |                    |                                 |                               |                                              |
|-----|--------------------|----------|-----------------------------------|--------------|---------------------------------------------------------------------------|--------------------|--------------------|---------------------------------|-------------------------------|----------------------------------------------|
|     | 施設名                | 郵便番号     | 住所（都道府県から記載）                      | 電話番号         | ウェブサイトURL                                                                 | 初診の電話等を用いた診療の実施の有無 | 再診の電話等を用いた診療の実施の有無 | 対応診療科                           | 担当医師名                         | 対面診療が必要と判断した場合に連携する医療機関名（複数ある場合は複数、住所も併せて記載） |
| 244 | 吉井医院               | 104-0041 | 東京都中央区新富1-5-14                    | 03-3551-2032 | <a href="https://www.yoshii-iin.or.jp">https://www.yoshii-iin.or.jp</a>   |                    | ○                  | 内科                              | 吉井 治<br>西田 友哉<br>福井 由希子       | 聖路加国際病院（東京都中央区明石町9-1）                        |
| 245 | リバーシティクリニック<br>東京  | 104-0051 | 東京都中央区佃1-11-8 ピアウエストスクエア2F        | 03-6219-7771 | <a href="https://rivercity-clinic.jp/">https://rivercity-clinic.jp/</a>   |                    | ○                  | 内科<br>消化器内科<br>婦人科              | 南川 里抄<br>栗田 昌裕                |                                              |
| 246 | リバーシティ子どもクリ<br>ニック | 104-0051 | 東京都中央区佃二丁目1番-6 リバーシティM<br>スクエア 1F | 03-5548-2323 | <a href="http://rc-kodomo.jp/">http://rc-kodomo.jp/</a>                   |                    | ○                  | 小児科                             | 設楽利二                          | 聖路加国際病院                                      |
| 247 | リバーシティすずき整形<br>外科  | 102-0051 | 東京都中央区佃1-11-8ピアウエストスクエア2階<br>264  | 03-3534-5678 | <a href="http://suzuki-seikei.tokyo">http://suzuki-seikei.tokyo</a>       |                    | ○                  | 整形外科<br>リハビリテー<br>ション科<br>リウマチ科 | 鈴木秀彦                          |                                              |
| 248 | 市川医院               | 104-0061 | 東京都中央区銀座2-11-19銀座市川ビル             | 03-3541-7202 |                                                                           |                    | ○                  | 内科<br>皮膚科<br>消化器科               | 市川 尚一                         |                                              |
| 249 | 銀座まいにちクリニック        | 104-0061 | 東京都中央区銀座4-13-11銀座M&Sビル4F          | 03-6260-6001 | <a href="https://mainichiclinic.jp/">https://mainichiclinic.jp/</a>       | ○                  | ○                  | 内科、泌尿器<br>科、皮膚科                 | 山本悠太                          |                                              |
| 250 | 東京アスポクリニック         | 104-0031 | 東京都中央区京橋2-2-1 京橋エドグラン24F          | 03-6665-0518 | <a href="https://www.asbo.or.jp/">https://www.asbo.or.jp/</a>             | ○                  | ○                  | 内科<br>整形外科<br>婦人科               | 板倉弘重<br>永江玄太<br>手取屋岳夫<br>神谷貴之 |                                              |
| 251 | 東京トータル美容クリニック      | 104-0061 | 東京都中央区銀座8-10-2 ルアンビル8F            | 03-3573-7878 | <a href="https://tokyo-tbc.jp/inquiry/">https://tokyo-tbc.jp/inquiry/</a> | ○                  |                    | 美容外科・皮膚<br>科・形成外科               | 久保田 全                         |                                              |
| 252 | 銀座セントラルクリニック       | 104-0061 | 東京都中央区銀座1-15-4 銀座1丁目ビル5階          | 03-5579-5995 | gcclinic.jp                                                               |                    | ○                  | 消化器内科<br>肛門内科<br>内科             | 鈴木 康夫<br>年森 明子                | 昭和大学江東豊洲病院(東京都江東区豊洲5-1-38)                   |

電話や情報通信機器を用いて診療を実施する医療機関の一覧（東京都）

|     | 基本情報                  |          |                             |              |                                                                                 | 事務連絡に基づく対応について     |                    |                     |                                 |                                              |
|-----|-----------------------|----------|-----------------------------|--------------|---------------------------------------------------------------------------------|--------------------|--------------------|---------------------|---------------------------------|----------------------------------------------|
|     | 施設名                   | 郵便番号     | 住所（都道府県から記載）                | 電話番号         | ウェブサイトURL                                                                       | 初診の電話等を用いた診療の実施の有無 | 再診の電話等を用いた診療の実施の有無 | 対応診療科               | 担当医師名                           | 対面診療が必要と判断した場合に連携する医療機関名（複数ある場合は複数、住所も併せて記載） |
| 253 | アイビークリニック虎ノ門          | 105-0001 | 東京都港区虎ノ門1-8-8               | 03-5501-1511 | <a href="http://www.ivy-clinic.biz/">http://www.ivy-clinic.biz/</a>             | ○                  | ○                  | 内科<br>外科<br>消化器科    | 畝村 さゆみ<br>畝村 泰樹                 |                                              |
| 254 | あおいクリニック              | 105-0003 | 東京都港区西新橋3-19-12 メディコ西新橋ビル4階 | 03-6453-0039 | <a href="https://aoiclinic.jp/">https://aoiclinic.jp/</a>                       | ○                  | ○                  | 糖尿病内科<br>内科         | 森武美帆                            |                                              |
| 255 | あおぞらクリニック新橋院          | 105-0004 | 東京都港区新橋2-16-1ニュー新橋ビル3階339   | 03-3506-8880 | <a href="https://www.aozoracl.com/">https://www.aozoracl.com/</a>               | ○                  | ○                  | 感染症内科               | 内田千秋                            |                                              |
| 256 | あおば皮膚科クリニック           | 106-0045 | 東京都港区麻布十番1-5-8ヴェスタビル2F      | 03-6447-1290 | <a href="https://aoba.clinic">https://aoba.clinic</a>                           | ○                  | ○                  | 皮膚科<br>内科           | 菊地さやか<br>川田裕人                   | 済生会中央病院<br>(東京都港区三田1-4-17)                   |
| 257 | 青山・表参道<br>睡眠ストレスクリニック | 107-0062 | 東京都港区南青山5-1-22 青山ライズスクエア3階  | 03-6427-6062 | <a href="https://omotesando-sleep.com">https://omotesando-sleep.com</a>         |                    | ○                  | 心療内科<br>精神科         | 中村 真樹                           |                                              |
| 258 | 青山メンタルクリニック           | 107-0062 | 東京都港区南青山3丁目18-21サンコーノビル4F   | 03-5772-9200 | <a href="https://www.aoyama-mc.com/">https://www.aoyama-mc.com/</a>             | ○                  | ○                  | 心療内科<br>精神科         | 中村 稔<br>安宅 勝弘<br>杉原 玄一          |                                              |
| 259 | 赤坂おだやかクリニック           | 107-6302 | 東京都港区赤坂5-3-1 赤坂BIZタワー2階     | 03-6234-511  | <a href="http://www.junreikai.com">http://www.junreikai.com</a>                 | ○                  | ○                  | 内科<br>循環器内科<br>呼吸器科 | 西澤 寛人<br>井上 宏一<br>林 光恵<br>伊藤 栄喜 |                                              |
| 260 | 赤坂ファミリークリニック          | 107-0052 | 東京都港区赤坂2-15-15 赤坂プラザビル3階    | 03-5562-8825 | <a href="http://www.afc.tokyo">http://www.afc.tokyo</a>                         | ○                  | ○                  | 小児科<br>内科           | 伊藤明子、<br>半下石美佐子、<br>安藤恵美子       |                                              |
| 261 | 赤坂見附前田病院              | 107-0051 | 東京都港区元赤坂1-1-5               | 03-3408-1136 | <a href="http://www.maeda-hospital.or.jp/">http://www.maeda-hospital.or.jp/</a> |                    | ○                  | 外科<br>内科<br>整形外科    | 前田 泉<br>岩郷 俊幸                   |                                              |

電話や情報通信機器を用いて診療を実施する医療機関の一覧（東京都）

|     | 基本情報                           |          |                             |              |                                            | 事務連絡に基づく対応について     |                    |                                |                                                                |                                              |
|-----|--------------------------------|----------|-----------------------------|--------------|--------------------------------------------|--------------------|--------------------|--------------------------------|----------------------------------------------------------------|----------------------------------------------|
|     | 施設名                            | 郵便番号     | 住所（都道府県から記載）                | 電話番号         | ウェブサイトURL                                  | 初診の電話等を用いた診療の実施の有無 | 再診の電話等を用いた診療の実施の有無 | 対応診療科                          | 担当医師名                                                          | 対面診療が必要と判断した場合に連携する医療機関名（複数ある場合は複数、住所も併せて記載） |
| 262 | あべ耳鼻咽喉科クリニック                   | 106-0032 | 東京都港区六本木6-1-20六本木電気ビル2F     | 03-3401-3387 | http://www.abe-ent.jp                      | ○                  | ○                  | 耳鼻咽喉科                          | 阿部悦子<br>倉田奈都子                                                  |                                              |
| 263 | アマラクリニック表参道                    | 107-0062 | 東京都港区南青山3-10-38-101         | 03-6438-9869 | http://www.amaraclinic.com/                | ○                  | ○                  | 精神科                            | 松園理英子                                                          |                                              |
| 264 | 有明こどもクリニック田町芝浦院                | 108-0023 | 東京都港区芝浦3-2-28-1階            | 03-6722-6300 | https://child-clinic.or.jp                 | ○                  | ○                  | 内科 耳鼻咽喉科<br>小児科                | 蛭名 彩<br>杉山 隆輔                                                  |                                              |
| 265 | 泉ウィメンズクリニック                    | 107-0062 | 東京都港区南青山5-4-3南青山泉ビル3階       | 03-3400-1213 | https://izumi-womens.jp/                   |                    | ○                  | 婦人科                            | 泉 康史                                                           |                                              |
| 266 | 医療法人財団玉川会エム・オー・エー高輪クリニック       | 108-0074 | 東京都港区高輪4-8-10 MOA会館1階       | 03-5421-0021 | https://itp.ne.jp/info/139940521116720110/ | ○                  | ○                  | 内科<br>心療内科                     | 鈴木清志、畠山和幸、蒲原聖可、加藤真三                                            |                                              |
| 267 | 医療法人社団IHL品川イーストワンメディカルクリニック    | 108-0075 | 東京都港区港南2-16-1 品川イーストワンタワー3F | 03-6718-2898 |                                            | ○                  | ○                  | 内科                             | 板倉 弘重<br>内山 明好<br>大西 真<br>白石 隆吉                                | NTT東日本関東病院（東京都品川区東五反田5-9-22）                 |
| 268 | 医療法人社団スリープクリニック<br>スリープクリニック青山 | 107-0062 | 東京都港区南青山4-2-4シャト-青山第3 101号室 | 03-5786-9700 | https://www.sleepmedicine-tokyo.com/       |                    | ○                  | 精神科<br>心療内科                    | 当日の担当医                                                         |                                              |
| 269 | 医療法人社団ケイセイ会パークサイドクリニック         | 105-0011 | 東京都港区芝公園2-6-8<br>日本女子会館ビル2F | 03-3434-7800 | http://parkside-clinic.jp/                 |                    | ○                  | 内科・外科<br>消化器科<br>糖尿病内科<br>循環器科 | 大原 成官<br>浅岡 弘                                                  |                                              |
| 270 | 医療法人財団順和会山王病院                  | 107-0052 | 東京都港区赤坂8-10-16              | 03-3402-3151 | https://www.sannoclc.or.jp/hospital/       | ○                  | ○                  | 内科                             | 小田原 雅人（糖尿病内科）<br>石川 卓也（糖尿病内科）<br>竹中 恒夫（腎臓内科）<br>清水 伸幸（消化器センター） | 山王病院の各診療科                                    |

電話や情報通信機器を用いて診療を実施する医療機関の一覧（東京都）

|     | 基本情報                              |          |                              |              |                                                                                                     | 事務連絡に基づく対応について     |                    |                         |           |                                                                                                                                                       |
|-----|-----------------------------------|----------|------------------------------|--------------|-----------------------------------------------------------------------------------------------------|--------------------|--------------------|-------------------------|-----------|-------------------------------------------------------------------------------------------------------------------------------------------------------|
|     | 施設名                               | 郵便番号     | 住所（都道府県から記載）                 | 電話番号         | ウェブサイトURL                                                                                           | 初診の電話等を用いた診療の実施の有無 | 再診の電話等を用いた診療の実施の有無 | 対応診療科                   | 担当医師名     | 対面診療が必要と判断した場合に連携する医療機関名（複数ある場合は複数、住所も併せて記載）                                                                                                          |
| 271 | 医療法人社団松柏会 藤田クリニック                 | 107-0062 | 東京都港区南青山2-22-19 三和青山ビル8階     | 03-5772-7381 | <a href="http://www.fujita-clinic.jp/index.html">http://www.fujita-clinic.jp/index.html</a>         |                    | ○                  | 内科<br>小児科               | 藤田耕一郎     |                                                                                                                                                       |
| 272 | 医療法人社団勝優会 たまちホームクリニック             | 108-0073 | 東京都港区三田3-1-4 Net. 1三田ビル1階    | 03-6435-2331 | <a href="http://www.shoyuukai.jp/tamachi/">http://www.shoyuukai.jp/tamachi/</a>                     | ○                  | ○                  | 内科・消化器科<br>泌尿器科         | 菰池 信彦     |                                                                                                                                                       |
| 273 | 医療法人社団 PrimePartners 新橋ファーストクリニック | 105-0004 | 東京都港区新橋3-14-5 S' TEC3ビル 3階   | 03-5777-5065 | <a href="https://first-clinic.jp/">https://first-clinic.jp/</a>                                     | ○                  | ○                  | 泌尿器科(自由診療)<br>皮膚科(自由診療) | 市村 明      |                                                                                                                                                       |
| 274 | 医療法人社団癒合会 高輪和合クリニック               | 108-0074 | 東京都港区高輪4-22-10 小川商事ビル2階      | 03-5447-8521 | <a href="https://www.takanawa-clinic.com/">https://www.takanawa-clinic.com/</a>                     | ○                  | ○                  | 内科                      | 陰山 康成     |                                                                                                                                                       |
| 275 | インターナショナルヘルスケアクリニック               | 105-0004 | 東京都港区新橋2-10-5末吉ビル3階          | 03-3501-1330 | <a href="https://www.ihc-clinic.jp/">https://www.ihc-clinic.jp/</a>                                 | ○                  | ○                  | 内科                      | 鷺尾美香      | NTT東日本関東 〒141-0022 東京都品川区東五反田5丁目9-22<br>虎の門病院 〒105-8470東京都港区虎ノ門2丁目2-2<br>都立広尾病院 〒150-0013 東京都渋谷区恵比寿2丁目34-10<br>けいゆう病院（〒220-8521 神奈川県横浜市西区みなとみらい3丁目7-3 |
| 276 | 大村ビル皮膚科                           | 105-0004 | 東京都港区新橋2-5-6大村ビル2階           | 03-3503-2278 | <a href="http://hifukaiin.at-ninja.jp/index.html">http://hifukaiin.at-ninja.jp/index.html</a>       |                    | ○                  | 皮膚科                     | 加曾利潤一郎    |                                                                                                                                                       |
| 277 | おかだスマイルクリニック                      | 105-0013 | 東京都港区浜松町2-3-1日本生命浜松町クレアタワー4F | 03-6809-1725 | <a href="https://okada-smile.com/">https://okada-smile.com/</a>                                     | ○                  | ○                  | 内科 外科<br>胃腸内科           | 岡田 慶吾     |                                                                                                                                                       |
| 278 | 岡野内科診療所                           | 105-0004 | 東京都港区新橋1-18-14三洋堂本館ビル8階      | 03-3502-8060 |                                                                                                     | ○                  | ○                  | 内科<br>胃腸科<br>肛門科        | 岡野喜久夫     |                                                                                                                                                       |
| 279 | お台場クリニック                          | 135-0092 | 東京都港区台場1-5-7-105             | 03-5531-0731 | <a href="http://www7b.biglobe.ne.jp/~odaiba-clinic/">http://www7b.biglobe.ne.jp/~odaiba-clinic/</a> |                    | ○                  | 内科、小児科<br>外科、皮膚科        | 櫻井貞夫、櫻井美佐 |                                                                                                                                                       |

電話や情報通信機器を用いて診療を実施する医療機関の一覧（東京都）

|     | 基本情報                    |          |                                      |              |                                        | 事務連絡に基づく対応について     |                    |                                                             |                                                      |                                              |
|-----|-------------------------|----------|--------------------------------------|--------------|----------------------------------------|--------------------|--------------------|-------------------------------------------------------------|------------------------------------------------------|----------------------------------------------|
|     | 施設名                     | 郵便番号     | 住所（都道府県から記載）                         | 電話番号         | ウェブサイトURL                              | 初診の電話等を用いた診療の実施の有無 | 再診の電話等を用いた診療の実施の有無 | 対応診療科                                                       | 担当医師名                                                | 対面診療が必要と判断した場合に連携する医療機関名（複数ある場合は複数、住所も併せて記載） |
| 280 | ガーデンクリニック広尾             | 107-0062 | 東京都港区南青山7-14-7-2F                    | 03-6427-9198 | www.gardenclinic-hiroo.com             | ○                  | ○                  | 皮膚科<br>アレルギー科                                               | キョンチンファイ                                             |                                              |
| 281 | 学校法人北里研究所 北里大学東洋医学総合研究所 | 108-8642 | 東京都港区白金5-9-1                         | 03-3444-6161 | https://www.kitasato-u.ac.jp/toui-ken/ | ○                  | ○                  | 漢方科                                                         | 小田口浩<br>鈴木邦彦<br>星野卓之<br>森裕紀子<br>川鍋伊晃<br>石毛達也<br>伊東秀憲 | 北里大学北里研究所病院（東京都港区白金5-9-1）                    |
| 282 | 眼科スターアイクリニック            | 107-0052 | 東京都港区赤坂2-11-15 第二堀内ビル4階              | 03-3505-9981 | http://www.starseye.com/               |                    | ○                  | 眼科                                                          | スターン美千代<br>堀越 淑子                                     |                                              |
| 283 | 銀座総合美容クリニック             | 105-0004 | 東京都港区新橋1-9-5 新橋M-SQUARE Bright 4F・5F | 0120-972-335 | https://www.gincli.jp/                 | ○                  | ○                  | 自由診療<br>(AGA)                                               | 正木 健太郎<br>須貝 歩                                       |                                              |
| 284 | クリニックフォア新橋              | 105-0004 | 東京都港区新橋1丁目4番5号 ヒューリックG10ビル 9F        | 03-4579-9029 | https://www.clinicfor.life/shimbashi/  | ○                  | ○                  | 内科<br>皮膚科<br>アレルギー科<br>美容皮膚<br>生活習慣病                        | 金子和真<br>圓山尚                                          |                                              |
| 285 | クリニックフォア田町              | 108-0023 | 東京都港区芝浦3丁目1-3 2 なぎさテラス 2F/4F         | 03-4579-8189 | https://www.clinicfor.life/tamachi/    | ○                  | ○                  | 内科<br>皮膚科<br>アレルギー科<br>生活習慣病<br>専門外来（甲状腺・いびき）               | 村丘寛和<br>金子和真                                         |                                              |
| 286 | 国際医療福祉大学三田病院            | 108-8329 | 東京都港区三田1-4-3                         | 03-3451-8121 | http://mita.iuhw.ac.jp/                |                    | ○                  | 内科、腎臓内科、糖尿病内科、内分泌内科、血液内科、呼吸器内科、呼吸器外科、消化器内科、消化器外科、循環器内科、脳神経科 | 各担当医                                                 |                                              |
| 287 | 国家公務員共済組合連合会 虎の門病院      | 105-8470 | 東京都港区虎ノ門2-2-2                        | 03-3588-1111 | https://www.toranomon.gr.jp/           |                    | ○                  | 全診療科                                                        |                                                      |                                              |
| 288 | サニーガーデンこどもクリニック         | 106-0045 | 東京都港区麻布十番2-18-8-6F                   | 03-6722-6623 | https://sunnygardencl.com/             | ○                  | ○                  | 小児科                                                         | 首里 京子                                                |                                              |



電話や情報通信機器を用いて診療を実施する医療機関の一覧（東京都）

|     | 基本情報            |          |                             |              |                                                | 事務連絡に基づく対応について     |                    |                              |                                          |                                                         |
|-----|-----------------|----------|-----------------------------|--------------|------------------------------------------------|--------------------|--------------------|------------------------------|------------------------------------------|---------------------------------------------------------|
|     | 施設名             | 郵便番号     | 住所（都道府県から記載）                | 電話番号         | ウェブサイトURL                                      | 初診の電話等を用いた診療の実施の有無 | 再診の電話等を用いた診療の実施の有無 | 対応診療科                        | 担当医師名                                    | 対面診療が必要と判断した場合に連携する医療機関名（複数ある場合は複数、住所も併せて記載）            |
| 289 | しおどめ眼科          | 105-0021 | 東京都港区東新橋1-8-2カレッタ汐留B1F      | 03-6228-5821 | www.shiodomeganka.jp                           |                    | ○                  | 眼科<br>内科                     | 岩間 真由美                                   | 東京慈恵会医科大学付属病院                                           |
| 290 | 芝浦クリニック         | 108-0023 | 東京都港区芝浦3-16-1 中野興産ビル1階      | 03-5765-5264 | http://shibaura-clinic.net                     |                    | ○                  | 内科皮膚科整形<br>外科                | 宇治原                                      |                                                         |
| 291 | 品川イーストクリニック     | 108-6102 | 東京都港区港南2-15-2 品川インターシティB棟2階 | 03-5783-5521 | e-clinic.gr.jp                                 | ○                  | ○                  | 内科<br>眼科                     | 本郷/二宮/中谷                                 |                                                         |
| 292 | 品川胃腸肛門内視鏡クリニック  | 108-0074 | 東京都港区高輪3-8-17 メディカルプライム高輪2階 | 03-3447-6337 | https://www.gutclinic.jp/                      | ○                  | ○                  | 消化器内科<br>内視鏡内科               | 望月 暁                                     | NTT東日本関東病院(東京都品川区東五反田5丁目9-22)<br>済生会中央病院(東京都港区三田1-4-17) |
| 293 | 湘南美容クリニック新橋銀座口院 | 105-0004 | 東京都港区新橋1-12-9 新橋プレイス9階      | 0120-546695  | https://www.s-b-c.net/clinic/branch/shinbashi/ | ○                  | ○                  | 美容皮膚科                        | 竹田啓介<br>中山昌大<br>内田 悠記<br>富田さくら<br>大貝 明日香 | 湘南美容クリニック各院                                             |
| 294 | 湘南内科クリニック六本木院   | 106-0032 | 東京都港区六本木6-1-24 ラピロス六本木8階    | 0120-228-622 | https://www.sbc-medicalcare-roppongi.com/      | ○                  | ○                  | 美容皮膚科・美容<br>内科・内科・<br>脂質代謝内科 | 御園生 佳奈子                                  | 湘南美容クリニック各院                                             |
| 295 | 湘南美容クリニック六本木院   | 106-0032 | 東京都港区六本木6-1-24 ラピロス六本木8階    | 0120-490089  | https://www.s-b-c.net/clinic/branch/roppongi/  | ○                  | ○                  | 美容皮膚科                        | 生水幹憲<br>小泉 彰郎<br>辻 大成                    | 湘南美容クリニック各院                                             |
| 296 | しろかねたかなわクリニック   | 108-0072 | 東京都港区白金1-13-11              | 03-6721-7561 | https://shirokanetakanawa.jp                   |                    | ○                  | 精神科<br>心療内科                  | 木村元紀<br>松島英介<br>市田典子                     |                                                         |
| 297 | 新田町ビル診療所        | 108-0014 | 東京都港区芝5-34-6-2F             | 03-3451-2619 |                                                |                    | ○                  | 内科 皮膚科                       | 坪田 淳 雅子                                  |                                                         |

電話や情報通信機器を用いて診療を実施する医療機関の一覧（東京都）

|     | 基本情報                |          |                                     |              |                                           | 事務連絡に基づく対応について     |                                           |                      |                 |                                                   |
|-----|---------------------|----------|-------------------------------------|--------------|-------------------------------------------|--------------------|-------------------------------------------|----------------------|-----------------|---------------------------------------------------|
|     | 施設名                 | 郵便番号     | 住所（都道府県から記載）                        | 電話番号         | ウェブサイトURL                                 | 初診の電話等を用いた診療の実施の有無 | 再診の電話等を用いた診療の実施の有無                        | 対応診療科                | 担当医師名           | 対面診療が必要と判断した場合に連携する医療機関名（複数ある場合は複数、住所も併せて記載）      |
| 298 | しんばし内科・脳神経クリニック     | 105-0004 | 東京都港区新橋1-17-2、<br>ダイワロイネットホテル新橋地下1階 | 03-3507-6066 | http://shimbashclinic.jp                  | ○                  | ○                                         | 内科・脳神経科              | 星 明彦            |                                                   |
| 299 | 心療内科・神経科<br>赤坂クリニック | 107-0052 | 東京都港区赤坂3-9-18 B.I.C赤坂ビル6F           | 03-5575-8198 | http://fuancclinic.com/akasaka/           |                    | ○                                         | 心療内科<br>精神科<br>小児神経科 | 貝谷久宣<br>以下16名   |                                                   |
| 300 | 菅原クリニック東京脳<br>ドック   | 107-6102 | 東京都港区赤坂5-2-20 赤坂パークビル2階             | 03-5573-8822 | https://tokyo-noudock.jp/                 | ○                  | ○                                         | 内科<br>脳神経外科          | 菅原 道仁<br>伊藤 たえ  |                                                   |
| 301 | 高輪台レディースクリ<br>ニック   | 108-0074 | 東京都港区高輪3-8-17 TK高輪ビル3階              | 03-3441-1377 | http://takanawadai-lc.com                 |                    | ○                                         | 産科・婦人科               | 瀧澤 慎<br>瀧澤 芳子   |                                                   |
| 302 | 田町メンタルクリニック         | 108-0014 | 東京都港区芝5-34-6新田町ビル2階                 | 03-6809-4132 | http://www.tamachi-mental.com/            |                    | ○                                         | 精神科<br>心療内科          | 網野 賀一郎<br>丸山 志織 |                                                   |
| 303 | 東京シティクリニック三<br>田    | 108-0014 | 東京都港区芝4-5-8 池藤ビル2F                  | 03-5439-5566 | https://www.tokyocityclinic-<br>mita.com/ | ○                  | ○                                         | 小児科<br>アレルギー科<br>内科  | 世間瀬 基樹          |                                                   |
| 304 | 東京慈恵会医科大学附属<br>病院   | 105-8471 | 東京都港区西新橋3-19-18                     | 03-3433-1111 | https://www.hosp.jikei.ac.jp/             |                    | ○<br>慢性疾患を有する再診<br>患者が対象で医師が必<br>要と判断した場合 | 全診療科                 | 各医師             |                                                   |
| 305 | 東京都済生会中央病院          | 108-0073 | 東京都港区三田1-4-17                       | 03-3451-8211 | http://www.saichu.jp                      |                    | ○                                         | 全診療科                 | 全担当医師           |                                                   |
| 306 | 東京ミッドタウンクリ<br>ニック   | 107-6206 | 東京都港区赤坂9-7-1 ミッドタウン・タワー6F           | 03-5413-0080 | https://www.tokyomidtown-<br>mc.jp/       | ○                  | ○                                         | 内科                   | 各担当医師           | 東京医大・国際医療福祉大学三田病院・日本医大・癌研<br>有明・日赤医療センター・NTT東日本病院 |

電話や情報通信機器を用いて診療を実施する医療機関の一覧（東京都）

|     | 基本情報                   |              |                                |               |                                                                                   | 事務連絡に基づく対応について     |                    |                   |                                                      |                                                    |
|-----|------------------------|--------------|--------------------------------|---------------|-----------------------------------------------------------------------------------|--------------------|--------------------|-------------------|------------------------------------------------------|----------------------------------------------------|
|     | 施設名                    | 郵便番号         | 住所（都道府県から記載）                   | 電話番号          | ウェブサイトURL                                                                         | 初診の電話等を用いた診療の実施の有無 | 再診の電話等を用いた診療の実施の有無 | 対応診療科             | 担当医師名                                                | 対面診療が必要と判断した場合に連携する医療機関名（複数ある場合は複数、住所も併せて記載）       |
| 307 | ながさき内科医院               | 03-3435-5707 | 東京都港区浜松町2-3-1 日本生命クレアタワー4階     | 03-3435-5707  | <a href="https://www.nagasakiinaiin.com/">https://www.nagasakiinaiin.com/</a>     | ○                  | ○                  | 内科                | 長崎綾子                                                 | 東京都済生会中央病院 東京慈恵会医科大学付属病院<br>東京都立広尾病院               |
| 308 | にしや耳鼻咽喉科クリニック          | 108-0075     | 東京都港区港南2-16-7 品川Vタワーメディカルゾーン2F | 03-5715-0248  | <a href="http://www.ent248.com/index.php">http://www.ent248.com/index.php</a>     | ○                  | ○                  | 耳鼻咽喉科             | 西谷 全弘                                                |                                                    |
| 309 | ピンクリボンプレストケアクリニック表参道   | 107-0061     | 東京都港区北青山3-6-19 バイナリー北青山2階      | 03-3407-7373  | <a href="http://pinkribbon-breastcare.com/">http://pinkribbon-breastcare.com/</a> | ○                  | ○                  | 乳腺外科<br>産婦人科      | 島田 菜穂子<br>宮城 由美<br>田村 宜子<br>石山 めぐみ<br>谷川 輝美<br>尾身 牧子 |                                                    |
| 310 | 古川橋病院                  | 106-8581     | 東京都港区南麻布2-10-21                | 03-3453-5011  | <a href="http://www.zai-kouseikai.or.jp">http://www.zai-kouseikai.or.jp</a>       |                    | ○                  | 内科<br>整形外科        |                                                      |                                                    |
| 311 | ホロン鳥居坂クリニック耳鼻咽喉科アレルギー科 | 106-0045     | 東京都港区麻布十番1-5-8ヴェスタビル4F         | 03-5770-8733  | <a href="https://holon-cl.com">https://holon-cl.com</a>                           | ○                  | ○                  | 耳鼻咽喉科<br>アレルギー科   | 仲田 拓人                                                | ホロン鳥居坂クリニック耳鼻咽喉科アレルギー科<br>（東京都港区麻布十番1-5-8ヴェスタビル4F） |
| 312 | みなと芝クリニック              | 105-0014     | 東京都港区芝2-12-1 2F                | 070-1313-0555 | <a href="http://www.minatoshiba-cl.com/">http://www.minatoshiba-cl.com/</a>       | ○                  | ○                  | 内科                | 川本 徹                                                 |                                                    |
| 313 | 南青山TOKUNAKAクリニック       | 107-0062     | 東京都港区南青山3-16-1南青山巴ビル3階4階       | 03-6812-9480  | <a href="https://tokunaka-clinic.com">https://tokunaka-clinic.com</a>             | ○                  | ○                  | 皮膚科形成外科           | 徳中亮平                                                 |                                                    |
| 314 | 南青山みみのクリニック            | 107-0062     | 東京都港区南青山3-3-16 ハレアカラ南青山1F      | 03-5772-6450  | <a href="http://www.yamakawa-clinic.com">http://www.yamakawa-clinic.com</a>       | ○                  | ○                  | 耳鼻咽喉科             | 山川 卓也                                                | 順天堂大学病院（東京都文京区本郷3-1-1）                             |
| 315 | 森野クリニック                | 105-0004     | 東京都港区新橋1-18-19キムラヤ大塚ビル7F       | 03-3591-2200  | <a href="https://morino-clinic.com">https://morino-clinic.com</a>                 | ○                  | ○                  | 脳神経外科<br>内科<br>外科 | 森野 道晴                                                |                                                    |

電話や情報通信機器を用いて診療を実施する医療機関の一覧（東京都）

|     | 基本情報                  |          |                                   |              |                                                                                     | 事務連絡に基づく対応について     |                    |                                                  |                         |                                              |
|-----|-----------------------|----------|-----------------------------------|--------------|-------------------------------------------------------------------------------------|--------------------|--------------------|--------------------------------------------------|-------------------------|----------------------------------------------|
|     | 施設名                   | 郵便番号     | 住所（都道府県から記載）                      | 電話番号         | ウェブサイトURL                                                                           | 初診の電話等を用いた診療の実施の有無 | 再診の電話等を用いた診療の実施の有無 | 対応診療科                                            | 担当医師名                   | 対面診療が必要と判断した場合に連携する医療機関名（複数ある場合は複数、住所も併せて記載） |
| 316 | やべ耳鼻咽喉科表参道            | 107-0062 | 東京都港区南青山5-10-19-5F                | 03-3409-3387 | <a href="http://www.yabe-3387.com">http://www.yabe-3387.com</a>                     | ○                  | ○                  | 耳鼻咽喉科<br>アレルギー科                                  | 矢部多加夫                   |                                              |
| 317 | 六本木レディースクリニック         | 106-0032 | 東京都港区六本木7-15-17 ユニ六本木ビル3階         | 0120-853-999 | <a href="https://www.sbc-ladies.com/">https://www.sbc-ladies.com/</a>               | ○                  | ○                  | 婦人科                                              | 山本 篤                    | 湘南美容クリニック各院                                  |
| 318 | 浅田レディース品川クリニック        | 108-0075 | 東京都港区港南2-3-13 品川フロントビル3F          | 03-3472-2203 | <a href="https://ivf-asada.jp/">https://ivf-asada.jp/</a>                           |                    | ○                  | 婦人科                                              | 吉岡 陽子                   |                                              |
| 319 | 医療法人社団ハクナマタタぼれぼれクリニック | 108-0074 | 東京都港区高輪1-5-21-4階                  | 03-5422-7626 | <a href="https://polepole-clinic.com">https://polepole-clinic.com</a>               | ○                  | ○                  | 小児科・内科                                           | 三浦 麻子                   | 愛育病院（東京都港区芝浦1-16-10）                         |
| 320 | みちとせクリニック             | 107-0062 | 東京都港区南青山三丁目8-13 1F-S              | 03-6434-9320 | <a href="https://michitoseclinic.jp/">https://michitoseclinic.jp/</a>               | ○                  | ○                  | 漢方内科<br>漢方小児科                                    | 堀田 広満                   |                                              |
| 321 | 内科 外科・優里医院            | 106-0047 | 東京都港区南麻布4-11-30 南麻布渋谷ビル7階         | 03-6450-3500 |                                                                                     |                    | ○                  | 内科<br>循環器内科<br>外科                                | 高橋 路子<br>大作 昌義<br>山田 好則 | 北里大学北里研究所病院（東京都港区白金5-9-1）                    |
| 322 | アイランド耳鼻咽喉科            | 163-1301 | 東京都新宿区西新宿6-5-1、<br>新宿アイランドタワー東館1階 | 03-5323-0252 | <a href="http://aisyukai.com">http://aisyukai.com</a>                               | ○                  | ○                  | 耳鼻咽喉科                                            | 高野 愛弓                   |                                              |
| 323 | あおぞらクリニック新宿院          | 160-0022 | 東京都新宿区新宿3-18-1しんじゅく一色ビル6階         | 03-3353-8800 | <a href="https://www.aozoracl.com/shinjyuku">https://www.aozoracl.com/shinjyuku</a> | ○                  | ○                  | 性感染症内科                                           | 福地裕三                    | あおぞらクリニック新橋院（東京都港区新橋2-16-1<br>ニュー新橋ビル3階339）  |
| 324 | あけぼの診療所               | 160-0001 | 東京都新宿区 片町2-3 菱和ビル                 | 03-6457-7237 | <a href="https://www.akebonoclinic.net/">https://www.akebonoclinic.net/</a>         | ○                  | ○                  | 内科<br>循環器内科<br>腎臓内科<br>皮膚科<br>形成外科<br>リハビリテーション科 | 下山祐人                    |                                              |

電話や情報通信機器を用いて診療を実施する医療機関の一覧（東京都）

|     | 基本情報                   |          |                              |              |                             | 事務連絡に基づく対応について     |                    |             |              |                                              |
|-----|------------------------|----------|------------------------------|--------------|-----------------------------|--------------------|--------------------|-------------|--------------|----------------------------------------------|
|     | 施設名                    | 郵便番号     | 住所（都道府県から記載）                 | 電話番号         | ウェブサイトURL                   | 初診の電話等を用いた診療の実施の有無 | 再診の電話等を用いた診療の実施の有無 | 対応診療科       | 担当医師名        | 対面診療が必要と判断した場合に連携する医療機関名（複数ある場合は複数、住所も併せて記載） |
| 325 | 曙ホームクリニック              | 162-0054 | 東京都新宿区河田町3-8 THE DENS曙橋204   | 03-5357-7656 | http://akebono-home.jp      | ○                  | ○                  | 脳神経内科<br>内科 | 余郷 麻希子       |                                              |
| 326 | 阿蘇医院                   | 160-0008 | 東京都新宿区四谷三栄町1-5               | 03-3351-3224 | www.aso.iin.com/            |                    | ○                  | 内科          | 阿蘇 大輔        |                                              |
| 327 | あべメディカルクリニック           | 162-0811 | 東京都新宿区水道町4-29宝ビル1階           | 03-6228-1783 | https://abemc.jp/           |                    | ○                  | 内科皮膚科       | 阿部航<br>阿部郁子  |                                              |
| 328 | アルバ・メンタルクリニック          | 160-0022 | 東京都新宿区新宿3-32-5日原ビル7階         | 03-5360-7119 | http://www.alba-mental.jp   |                    | ○                  | 精神科<br>心療内科 | 海老澤佐知江       |                                              |
| 329 | 飯田橋中村クリニック             | 162-0822 | 東京都新宿区下宮比町3-2 日本精鋳ビル2F       | 03-5225-7119 |                             |                    | ○                  | 内科<br>泌尿器科  | 中村剛<br>蔵本美与子 |                                              |
| 330 | いしい内科・外科クリニック          | 160-0023 | 東京都新宿区西新宿7-1-10 守矢ビル5F       | 03-5937-3361 | https://ishii-cl.net/       | ○                  | ○                  | 内科<br>外科    | 石井 雄二        |                                              |
| 331 | 磯貝クリニック                | 169-0051 | 東京都新宿区西早稲田2-4-8              | 03-3232-1776 |                             | ○                  | ○                  | 内科          | 磯貝祐貴子        | 区内医療機関                                       |
| 332 | 一般社団法人 日本家族計画協会市谷クリニック | 162-0843 | 東京都新宿区市谷町1-10保健会館新館2階        | 03-3235-2694 | http://www.jfpa-clinic.org/ |                    | ○                  | 婦人科         | 北村 邦夫        |                                              |
| 333 | いなげ眼科                  | 169-0075 | 東京都新宿区高田馬場1-21-10豊電ビル3階いなげ眼科 | 03-6380-2668 | http://inage-ganka.com/     |                    | ○                  | 眼科<br>小児眼科  | 稲毛佐知子        |                                              |

電話や情報通信機器を用いて診療を実施する医療機関の一覧（東京都）

|     | 基本情報                             |          |                                          |              |                                                                                                                                 | 事務連絡に基づく対応について     |                    |                                              |                                                                                 |                                                                                         |
|-----|----------------------------------|----------|------------------------------------------|--------------|---------------------------------------------------------------------------------------------------------------------------------|--------------------|--------------------|----------------------------------------------|---------------------------------------------------------------------------------|-----------------------------------------------------------------------------------------|
|     | 施設名                              | 郵便番号     | 住所（都道府県から記載）                             | 電話番号         | ウェブサイトURL                                                                                                                       | 初診の電話等を用いた診療の実施の有無 | 再診の電話等を用いた診療の実施の有無 | 対応診療科                                        | 担当医師名                                                                           | 対面診療が必要と判断した場合に連携する医療機関名（複数ある場合は複数、住所も併せて記載）                                            |
| 334 | いやま眼科                            | 162-0811 | 東京都新宿区水道町4-13 三晃ビル3F クリニック<br>ステーション江戸川橋 | 03-5946-8188 | <a href="https://www.iyama-eyeclinic.com/">https://www.iyama-eyeclinic.com/</a>                                                 | ○                  | ○                  | 眼科                                           | 井山 千草                                                                           |                                                                                         |
| 335 | 医療法人財団東京勤労者<br>医療会 おおくぼ戸山診<br>療所 | 162-0072 | 東京都新宿区大久保2-8-2                           | 03-5272-2585 | <a href="http://www.tokyo-kinikai.com/02jigyosyo/jigyosyo_02.html">http://www.tokyo-kinikai.com/02jigyosyo/jigyosyo_02.html</a> |                    | ○                  | 内科                                           | 梅津 仁                                                                            |                                                                                         |
| 336 | 医療法人社団あけぼの会<br>山本医院              | 161-0033 | 東京都新宿区下落合4-23-21                         | 161-0033     | <a href="http://www.yamamotoiin.org/">http://www.yamamotoiin.org/</a>                                                           |                    | ○                  | 皮膚科<br>泌尿器科                                  | 山本史郎                                                                            | 聖母病院（東京都新宿区中落合2-5-1）<br>JCHO東京山手メディカルセンター（東京都新宿区百人町<br>3-22-1）                          |
| 337 | 医療法人社団石川記念会<br>新宿石川クリニック         | 160-0023 | 東京都新宿区西新宿1-7-1<br>松岡セントラルビル6・7階          | 03-3340-1751 | <a href="https://ishikawa-hp.com/shinjuku/">https://ishikawa-hp.com/shinjuku/</a>                                               |                    | ○                  | 糖尿内科<br>泌尿器科<br>移植外来<br>内分泌科<br>腎臓内科<br>循環器科 | 三浦順子<br>哲翁たまき<br>佐中真由実<br>丸山聡子<br>尾形真紀子<br>勝盛弘三<br>三木誠<br>小山一郎                  |                                                                                         |
| 338 | 医療法人社団医進会小田<br>クリニック             | 169-0072 | 東京都新宿区大久保1-11-3大東ビル2階                    | 03-5273-0770 | <a href="https://www.ishinkai-mc.net">https://www.ishinkai-mc.net</a>                                                           |                    | ○                  | 内科                                           | 高崎医師                                                                            | 国立国際医療研究センター病院<br>国立国際医療研究センター病院                                                        |
| 339 | 医療法人社団慶洋会 ケ<br>アイクリニック           | 160-0004 | 東京都新宿区四谷1-20-23ケアイメディカルビ<br>ル            | 03-5269-2111 | <a href="http://kiclinic.jp/kic/kenshin.html">http://kiclinic.jp/kic/kenshin.html</a>                                           | ○                  | ○                  | 内科/整形外科/<br>婦人科/泌尿器<br>科                     | 黒瀬 巖・石原<br>雅巳・齋藤 英<br>胤・篠澤 妙<br>子・吉田 えり<br>/河合 桃太<br>郎・佐々木<br>正・岸田 俊<br>一・高橋 慶行 | 慶應義塾大学病院（東京都新宿区信濃町35）<br>国際医療福祉大学三田病院（東京都港区三田1-4-3）<br>国立国際医療研究センター（東京都新宿区戸山1-21-<br>1） |
| 340 | 医療法人社団慶潤会K D<br>D I ビルクリニック      | 163-8003 | 東京都新宿区西新宿 2-3-2 KDDIビル1階                 | 03-6386-0123 | <a href="http://www.keijunkai-kddi.jp">http://www.keijunkai-kddi.jp</a>                                                         |                    | ○                  | 内科                                           | 林 潤一<br>岩橋尚子<br>中村美波子<br>五十嵐悠一<br>五十嵐慶子<br>加藤真由子                                |                                                                                         |
| 341 | 医療法人社団慶潤会<br>新都心十二社クリニック         | 160-0023 | 東京都新宿区西新宿5-5-1-203<br>ザ・パークハウス西新宿タワー60   | 03-3377-3033 | <a href="http://www.keijunkai.or.jp">http://www.keijunkai.or.jp</a>                                                             |                    | ○                  | 内科                                           | 久米雅彦                                                                            |                                                                                         |
| 342 | 医療法人社団広恵会<br>春山記念病院              | 169-0073 | 東京都新宿区百人町1-24-5                          | 03-3363-1661 | <a href="https://www.haruyama-hosp.com">https://www.haruyama-hosp.com</a>                                                       |                    | ○                  | 内科<br>外科                                     | 清川 隆<br>山田 省一                                                                   |                                                                                         |

電話や情報通信機器を用いて診療を実施する医療機関の一覧（東京都）

|     | 基本情報                          |          |                                 |               |                                                                           | 事務連絡に基づく対応について     |                    |                            |                            |                                                                                           |
|-----|-------------------------------|----------|---------------------------------|---------------|---------------------------------------------------------------------------|--------------------|--------------------|----------------------------|----------------------------|-------------------------------------------------------------------------------------------|
|     | 施設名                           | 郵便番号     | 住所（都道府県から記載）                    | 電話番号          | ウェブサイトURL                                                                 | 初診の電話等を用いた診療の実施の有無 | 再診の電話等を用いた診療の実施の有無 | 対応診療科                      | 担当医師名                      | 対面診療が必要と判断した場合に連携する医療機関名（複数ある場合は複数、住所も併せて記載）                                              |
| 343 | 医療法人社団恒正会<br>そねクリニック新宿        | 160-0022 | 東京都新宿区新宿三丁目32番8号 新宿中央口ビル<br>3階  | 03-3356-3888  | <a href="https://www.soneclinic.com/">https://www.soneclinic.com/</a>     |                    | ○                  | 内科                         | 曾根 正好                      |                                                                                           |
| 344 | 医療法人社団玄英会<br>新宿ウエストクリニック      | 160-0023 | 東京都新宿区西新宿7-9-7<br>丸山ビル5F        | 03-5330-4079  | <a href="https://www.westcl.com/">https://www.westcl.com/</a>             | ○                  | ○                  | 形成外科、美容<br>外科、泌尿器<br>科、皮膚科 | 入江武志                       |                                                                                           |
| 345 | 医療法人社団順正会<br>ヒロオカクリニック        | 160-0022 | 東京都新宿区新宿2丁目5番12号 3F             | 03-3225-1666  | <a href="http://www.h-cl.org/">http://www.h-cl.org/</a>                   | ○                  | ○                  | 内科                         | 田原 稔<br>弘岡 泰正<br>弘岡 順子     |                                                                                           |
| 346 | 医療法人社団尚高会 西<br>新宿きさらぎクリニック    | 160-0023 | 東京都新宿区西新宿6-6-2 新宿国際ビルディン<br>グ1階 | 03-3344-0529  | <a href="http://kisa-cl.com/">http://kisa-cl.com/</a>                     |                    | ○                  | 消化器内科 内<br>視鏡内科 内科         | 石川 尚之<br>福澤 麻理             |                                                                                           |
| 347 | 医療法人社団新友会 プ<br>ラザ30階クリニック     | 160-0023 | 東京都新宿区西新宿2-2-1京王プラザホテル本館<br>30階 | 03-5323-4330  |                                                                           |                    | ○                  | 内科<br>婦人科<br>眼科<br>皮膚科     | 高橋 義徳                      |                                                                                           |
| 348 | 医療法人社団清慈会<br>牛込パーククリニック       | 162-0053 | 東京都新宿区原町1-18                    | 03-6380-3387  | <a href="https://ushigomepark-cl.com/">https://ushigomepark-cl.com/</a>   | ○                  | ○                  | 内科<br>・皮膚科<br>・歯科          | 猪瀬 悠理<br>/宮坂 厚弘<br>他各担当医師  | 国立国際医療研究センター（東京都新宿区戸山1-21-1）<br>東京慈恵医科大学付属病院（東京都港区西新橋3-19-18）<br>東京女子医科大学病院（東京都新宿区河田町8-1） |
| 349 | 医療法人先進会<br>先進会眼科 東京           | 163-1335 | 東京都新宿区西新宿6-5-1<br>新宿アイランドタワー35F | 03-5990-5212  | <a href="https://senshinkai-clinic.jp/">https://senshinkai-clinic.jp/</a> | ○                  | ○                  | 眼科                         | カムラン 典子<br>比嘉 利沙子<br>石山 善三 |                                                                                           |
| 350 | 医療法人社団菱秀会<br>金内メディカルクリニッ<br>ク | 160-0023 | 東京都新宿区西新宿7-5-25-2階              | 080-4166-9341 | <a href="http://www.kmc.or.jp">http://www.kmc.or.jp</a>                   | ○                  | ○                  | 内科                         | 永積 惇<br>木内麻里<br>金柿久里子      | 大久保病院（東京都新宿区歌舞伎町2-44-1）                                                                   |
| 351 | 医療法人社団竹誠会 宗<br>像クリニック         | 161-0033 | 東京都新宿区下落合1-6-1                  | 03-3227-2510  |                                                                           |                    | ○                  | 内科                         | 宗像 昭夫                      |                                                                                           |

電話や情報通信機器を用いて診療を実施する医療機関の一覧（東京都）

|     | 基本情報                |          |                               |              |                                                                                               | 事務連絡に基づく対応について     |                    |                |       |                                              |
|-----|---------------------|----------|-------------------------------|--------------|-----------------------------------------------------------------------------------------------|--------------------|--------------------|----------------|-------|----------------------------------------------|
|     | 施設名                 | 郵便番号     | 住所（都道府県から記載）                  | 電話番号         | ウェブサイトURL                                                                                     | 初診の電話等を用いた診療の実施の有無 | 再診の電話等を用いた診療の実施の有無 | 対応診療科          | 担当医師名 | 対面診療が必要と判断した場合に連携する医療機関名（複数ある場合は複数、住所も併せて記載） |
| 352 | 医療法人双葉会 新大久保文化通り診療所 | 169-0073 | 東京都新宿区百人町2丁目5-8 科研ビル1F        | 03-5937-0610 | <a href="http://www.shinookubo-bunkadori.clinic/">http://www.shinookubo-bunkadori.clinic/</a> |                    | ○                  | 内科             | 畑田 康政 | JCHO東京山手メディカルセンター                            |
| 353 | えどがわ橋内科・内視鏡クリニック    | 162-0811 | 東京都新宿区水道町4-13三晃ビル3階           | 03-5228-0750 | <a href="https://edogawabashi-naishikyo.com/">https://edogawabashi-naishikyo.com/</a>         | ○                  | ○                  | 内科<br>消化器内科    | 上條信也  |                                              |
| 354 | 大内クリニックおおくぼ         | 169-0073 | 東京都新宿区百人町2-11-24 染矢グロービル3階    | 03-6279-2277 | <a href="http://www.oouchihp.net/ookubo/">http://www.oouchihp.net/ookubo/</a>                 |                    | ○                  | 精神科            | 舟木 栄一 |                                              |
| 355 | 太田医院                | 160-0008 | 東京都新宿区四谷三栄町9-6                | 03-5366-3213 |                                                                                               | ○                  | ○                  | 内科             | 太田 正敏 |                                              |
| 356 | 落合パークサイドクリニック       | 161-0034 | 東京都新宿区上落合1-1-4鈴木ビル4F          | 03-5338-4976 | <a href="http://parkside-clinic.com">http://parkside-clinic.com</a>                           | ○                  | ○                  | 内科             | 外尾正俊  | 新宿区内の医療機関                                    |
| 357 | オペラシティクリニック         | 163-1047 | 東京都新宿区西新宿3-20-2 東京オペラシティタワー7階 | 03-5353-7100 | <a href="https://operacity-clinic.com/">https://operacity-clinic.com/</a>                     |                    | ○                  | 内科             | 室賀一宏  |                                              |
| 358 | かおり内科クリニック          | 163-1090 | 東京都新宿区西新宿3-7-1 新宿パークタワーB1F    | 03-5321-6677 | <a href="https://www.kaoriclinic.jp/">https://www.kaoriclinic.jp/</a>                         | ○                  | ○                  | 内科<br>リウマチ科    | 阿部 香織 |                                              |
| 359 | 神楽坂医院               | 162-0825 | 東京都新宿区神楽坂3-6 近藤ビル1階           | 03-3269-7267 | <a href="http://www.kagurazaka-iin.com">http://www.kagurazaka-iin.com</a>                     | ○                  | ○                  | 内科 整形外科<br>麻酔科 | 安部 通  |                                              |
| 360 | 神楽坂こころのクリニック        | 162-0825 | 東京都新宿区神楽坂6-48 TOMOSビル5階       | 03-6280-8407 | <a href="http://www.kagurazaka-mc-com">http://www.kagurazaka-mc-com</a>                       |                    | ○                  | 心療内科<br>精神科    | 鈴木 英朗 |                                              |



電話や情報通信機器を用いて診療を実施する医療機関の一覧（東京都）

|     | 基本情報                |          |                          |              |                                                                                                                         | 事務連絡に基づく対応について     |                    |                                                                                                                                                             |                                                                                         |                                                   |
|-----|---------------------|----------|--------------------------|--------------|-------------------------------------------------------------------------------------------------------------------------|--------------------|--------------------|-------------------------------------------------------------------------------------------------------------------------------------------------------------|-----------------------------------------------------------------------------------------|---------------------------------------------------|
|     | 施設名                 | 郵便番号     | 住所（都道府県から記載）             | 電話番号         | ウェブサイトURL                                                                                                               | 初診の電話等を用いた診療の実施の有無 | 再診の電話等を用いた診療の実施の有無 | 対応診療科                                                                                                                                                       | 担当医師名                                                                                   | 対面診療が必要と判断した場合に連携する医療機関名（複数ある場合は複数、住所も併せて記載）      |
| 361 | 神楽坂内科<br>脳神経内科クリニック | 162-0825 | 東京都新宿区神楽坂6-42神楽坂喜多川ビル1階  | 03-6280-7582 | <a href="https://kagurazakanaika.wixsite.com/kagurazakaclinic">https://kagurazakanaika.wixsite.com/kagurazakaclinic</a> | ○                  | ○                  | 内科<br>脳神経内科                                                                                                                                                 | 院長 坂本 智子                                                                                | JCHO東京新宿メディカルセンター（東京都新宿区）<br>国立国際医療研究センター（東京都新宿区） |
| 362 | 神楽坂みなみの眼科           | 162-0825 | 東京都新宿区神楽坂5-21-1長谷川ビル2階   | 03-6280-7690 | <a href="http://www.minamino-ganka.com">http://www.minamino-ganka.com</a>                                               |                    | ○                  | 眼科                                                                                                                                                          | 南野 麻美                                                                                   |                                                   |
| 363 | 久木田医院               | 161-0031 | 東京都新宿区西落合1-9-8           | 03-3952-5550 | <a href="http://kukita-clinic.com/">http://kukita-clinic.com/</a>                                                       | ○<br>受診歴のある方のみ     | ○                  | 耳鼻咽喉科                                                                                                                                                       | 久木田 尚仁                                                                                  |                                                   |
| 364 | 栗原隆ウェルネスクリニック       | 1620044  | 東京都新宿区喜久井町4-1新宿印刷会館4階    | 03-6457-6572 | <a href="https://www.dr-taka.jp/">https://www.dr-taka.jp/</a>                                                           | ○                  | ○                  | 内科                                                                                                                                                          | 栗原隆                                                                                     |                                                   |
| 365 | 慶應義塾大学病院            | 160-8582 | 東京都新宿区信濃町35              | 03-3353-1211 | <a href="http://www.hosp.keio.ac.jp/">http://www.hosp.keio.ac.jp/</a>                                                   |                    | ○                  | 外来診療を行う診療科                                                                                                                                                  | 各診療科担当医                                                                                 |                                                   |
| 366 | 国立国際医療研究センター病院      | 162-8655 | 東京都新宿区戸山1-21-1           | 03-3202-7181 | <a href="http://www.hosp.ncgm.go.jp/index.html">http://www.hosp.ncgm.go.jp/index.html</a>                               |                    | ○                  | 呼吸器内科、消化器内科（消化管）、消化器内科（肝臓）、循環器内科、腎臓内科、神経内科、小児科、精神科、心療内科、糖尿病内分泌代謝科、膠原病科、血液内科、産科、小児科、皮膚科、泌尿器科、整形外科、放射線科、歯科、眼科、耳鼻咽喉科、皮膚科、泌尿器科、産科、小児科、皮膚科、泌尿器科、放射線科、歯科、眼科、耳鼻咽喉科 | 坂本雅博、秋山純一、柳瀬幹雄、廣井透雄、日ノ下文彦、新井憲俊、七野浩之、加藤温、菊地裕絵、梶尾裕、金子礼志、半下石明、山田和彦、清松知充、竹村信行、北川大、清水千佳子、長坂知 |                                                   |
| 367 | コンフォガーデンクリニック       | 162-0054 | 東京都新宿区河田町3-2             | 03-3357-0086 | <a href="http://www.shokoukai.com/">http://www.shokoukai.com/</a>                                                       | ○                  | ○                  | 内科<br>小児科                                                                                                                                                   | 関口 聡子<br>及川 信哉                                                                          | 国立国際医療研究センター（東京都新宿区戸山1丁目21-1）                     |
| 368 | 紫藤クリニック             | 169-0075 | 東京都新宿区高田馬場1-29-21みかどビル2階 | 03-3232-1622 | <a href="https://www.shido-clinic.com/">https://www.shido-clinic.com/</a>                                               |                    | ○                  | 精神科                                                                                                                                                         | 紫藤 昌彦                                                                                   |                                                   |
| 369 | 耳鼻咽喉科ヒロ医院           | 169-0075 | 東京都新宿区高田馬場3-2-5A Nビル7階   | 03-3369-3033 | <a href="http://jibika-hiroiin.com">http://jibika-hiroiin.com</a>                                                       |                    | ○                  | 耳鼻咽喉科                                                                                                                                                       | 宮坂宏恵                                                                                    |                                                   |

電話や情報通信機器を用いて診療を実施する医療機関の一覧（東京都）

|     | 基本情報               |          |                                |              |                                                                                                                                       | 事務連絡に基づく対応について     |                    |                                     |                                                                       |                                                                                                                                       |
|-----|--------------------|----------|--------------------------------|--------------|---------------------------------------------------------------------------------------------------------------------------------------|--------------------|--------------------|-------------------------------------|-----------------------------------------------------------------------|---------------------------------------------------------------------------------------------------------------------------------------|
|     | 施設名                | 郵便番号     | 住所（都道府県から記載）                   | 電話番号         | ウェブサイトURL                                                                                                                             | 初診の電話等を用いた診療の実施の有無 | 再診の電話等を用いた診療の実施の有無 | 対応診療科                               | 担当医師名                                                                 | 対面診療が必要と判断した場合に連携する医療機関名（複数ある場合は複数、住所も併せて記載）                                                                                          |
| 370 | 耳鼻いんこう科<br>山西クリニック | 162-0041 | 東京都新宿区早稲田鶴巻町518第一石川ビル2F        | 03-5155-0822 | http://www.yamanishiclinic.jp/                                                                                                        | ○                  | ○                  | 耳鼻咽喉科                               | 山西敏朗                                                                  | 国立国際医療研究センター（東京都新宿区戸山1-21-1）                                                                                                          |
| 371 | 湘南AGAクリニック西新宿院     | 160-0023 | 東京都新宿区西新宿7-21-3 西新宿大京ビル7階      | 0120-541-488 | https://www.sbc-aga.jp/clinic/branch/agaoguard/?fd_bridge_id=emsrY11td1VJL3AyNEpSRmR2TXNYQT09LS1GallVeDYzeU9ndmd6d0p3R115TUJ3PT0%3D-- |                    | ○                  | AGA<br>（自由診療）                       | 曾我 俊介<br>阿部 吉伸<br>光川 泰弘<br>谷 治 春香                                     | 湘南美容クリニック各院                                                                                                                           |
| 372 | 湘南美容クリニック新宿本院      | 163-1324 | 東京都新宿区西新宿6-5-1 アイランドタワー24階     | 0120-548-940 | https://www.s-b-c.net/clinic/branch/shinjuku/                                                                                         | ○                  | ○                  | 美容皮膚科                               | 西川 礼華<br>宮里 翔子<br>山本 彩<br>林 篤志<br>山本 しおり<br>完山 依里子<br>藤瀬 恵里香<br>太田 真子 |                                                                                                                                       |
| 373 | 新宿NSビルクリニック        | 163-0804 | 東京都新宿区西新宿2-4-1<br>新宿NSビル4階     | 03-3343-3511 | http://www.sakakibarakouseikai.com/ns/                                                                                                |                    | ○                  | 内科                                  | 磯野 椋棒<br>小口 小船井<br>柴田 菊池 東<br>大武 橋本<br>市川 小原<br>田中 高木                 | 東京女子医科大学病院（東京都新宿区河和田町8-1）<br>大久保病院（東京都新宿区歌舞伎町2-44-1）<br>東海大学医学部付属東京病院（東京都渋谷区代々木1-2-5）<br>東京医大病院（東京都新宿区西新宿6-7-1）                       |
| 374 | 新宿OP廣瀬クリニック        | 162-0054 | 東京都新宿区河田町7-6 新宿OPビル            | 03-6380-1280 | hirose-clinic.net                                                                                                                     | ○                  | ○                  | 精神科/心療内科                            | 廣瀬久益/廣瀬圭太/廣瀬能華                                                        | 廣瀬クリニック（茨城県水戸市見川町2352-3）                                                                                                              |
| 375 | 新宿オークタワークリニック      | 163-6002 | 東京都新宿区西新宿6-8-1 住友不動産新宿オークタワー2階 | 03-5381-0551 | http://oaktowerclinic.com                                                                                                             | ○                  | ○                  | 内科<br>循環器内科<br>呼吸器内科<br>消化器内科<br>外科 | 田中 鶴人                                                                 | 東京大学医学部附属病院（東京都文京区本郷6-8-1）<br>東京通信病院（東京都千代田区富士見2-14-23）<br>東京医科大学病院（東京都新宿区西新宿6-7-1）<br>JR東京総合病院（東京都渋谷区代々木）<br>大久保病院（東京都新宿区歌舞伎町2-44-1） |
| 376 | 新小川町クリニック          | 162-0814 | 東京都新宿区新小川町6-40 入交ビル3階          | 03-3235-5265 | https://www.hospita.jp/detail/934/                                                                                                    |                    | ○                  | 内科                                  | 早川和志                                                                  |                                                                                                                                       |
| 377 | 新宿 睡眠・呼吸器内科クリニック   | 163-1312 | 東京都新宿区西新宿6-5-1 新宿アイランドタワー12階   | 03-5909-5588 | http://www.shinjuku-sleep.jp                                                                                                          |                    | ○                  | 内科<br>呼吸器内科                         | 遠藤大介                                                                  |                                                                                                                                       |
| 378 | 新宿センタービル遠藤眼科       | 163-0055 | 東京都新宿区西新宿1-25-1新宿センタービル5F      | 03-3344-4146 |                                                                                                                                       | ○                  | ○                  | 眼科                                  | 遠藤耀子<br>山本美香（金曜）                                                      | 新宿区内の総合病院                                                                                                                             |

電話や情報通信機器を用いて診療を実施する医療機関の一覧（東京都）

|     | 基本情報           |          |                              |              |                                             | 事務連絡に基づく対応について     |                    |                   |                                  |                                                                                                                                                                           |
|-----|----------------|----------|------------------------------|--------------|---------------------------------------------|--------------------|--------------------|-------------------|----------------------------------|---------------------------------------------------------------------------------------------------------------------------------------------------------------------------|
|     | 施設名            | 郵便番号     | 住所（都道府県から記載）                 | 電話番号         | ウェブサイトURL                                   | 初診の電話等を用いた診療の実施の有無 | 再診の電話等を用いた診療の実施の有無 | 対応診療科             | 担当医師名                            | 対面診療が必要と判断した場合に連携する医療機関名（複数ある場合は複数、住所も併せて記載）                                                                                                                              |
| 379 | 新宿センタービルクリニック  | 163-0605 | 東京都新宿区西新宿1-25-1 新宿センタービル5階   | 03-3346-1151 | http://www.center-clinic.jp/                |                    | ○                  | 内科                | 平塚 伸                             |                                                                                                                                                                           |
| 380 | 新宿トミヒサクロスクリニック | 162-0067 | 東京都新宿区富久町17-2 富久クロス1F        | 03-3353-2111 | https://www.tomihisa-clinic.jp/             | ○                  | ○                  | 内科<br>小児科         | 三浦 崇希                            | 東京医科大学病院（東京都新宿区西新宿6-7-1）国立国際医療研究センター（東京都新宿区戸山1-21-1）大久保病院（東京都新宿区歌舞伎町2-44-1）                                                                                               |
| 381 | 新宿東口眼科医院       | 160-0022 | 東京都新宿区新宿3-25-1 ヒューリック新宿ビル9階  | 03-5363-0507 | http://www.shec.jp/                         |                    | ○                  | 眼科                | 新川 恭浩<br>長谷川 三代                  | 東京医科大学病院（東京都新宿区西新宿6-7-1）国立国際医療研究センター（東京都新宿区戸山1-21-1）                                                                                                                      |
| 382 | 新宿東口クリニック      | 160-0022 | 東京都新宿区新宿3-24-1 新宿M-SQUARE10F | 03-5366-3389 | http://www.shinjukuc.com/                   |                    | ○                  | 内科<br>皮膚科         | 山中 晃                             |                                                                                                                                                                           |
| 383 | 新宿ホームクリニック     | 160-0014 | 東京都新宿区内藤町1                   | 03-6273-2109 | https://shinjuku-home-clinic.com/           | ○                  | ○                  | 内科<br>整形外科        | 名倉 義人<br>菊池 亮                    | さくらクリニック（東京都世田谷区桜新町1-14-22-101）<br>レッツメディカルガーデンクリニック（東京都葛飾区細田5-15-6 アポロサンスビル1階）<br>九段下駅前まめクリニック（東京都千代田区九段北1丁目3-2 大橋ビル3階）<br>池袋東口まめクリニック（東京都豊島区東池袋1丁目4-2-12 ステーションサイドビル3F） |
| 384 | 新宿三井ビルクリニック    | 163-0404 | 東京都新宿区西新宿2-1-1 新宿三井ビル4階      | 03-3344-3311 | https://www.sakakibarakouseikai.com/mitsui/ |                    | ○                  | 内科<br>呼吸器科        | 足立 管原<br>斉藤 高倉<br>塩塚 丸山<br>柴田 菊池 | 東京女子医科大学病院（東京都新宿区河和田町8-1）<br>榊原記念病院（東京都府中市朝日町3-16-1）<br>国立国際研究医療センター（東京都新宿区戸山町1-21-1）                                                                                     |
| 385 | 新宿南口皮膚科        | 160-0023 | 東京都新宿区西新宿1-18-7-3F           | 03-3343-4103 | https://www.hifuka.com/                     |                    | ○                  | 皮膚科               | 乃木田 辰俊                           |                                                                                                                                                                           |
| 386 | 助川クリニック        | 169-0075 | 東京都新宿区高田馬場1-5-10             | 03-3209-3333 | https://sukegawa-clinic.com/                | ○                  | ○                  | 整形外科<br>内科<br>皮膚科 | 助川卓行<br>助川卓也<br>助川敦子<br>早稲田のぞみ   |                                                                                                                                                                           |
| 387 | 住友内科クリニック      | 160-0007 | 東京都新宿区荒木町4-4森初ビル2階           | 03-5362-3288 | http://sumitomo-clinic.jp/                  |                    | ○                  | 内科                | 住友 高                             | 国立国際医療研究センター病院（新宿区戸山1-21-1）                                                                                                                                               |

電話や情報通信機器を用いて診療を実施する医療機関の一覧（東京都）

|     | 基本情報                  |          |                           |              |                                      | 事務連絡に基づく対応について     |                    |                          |                       |                                                                                         |
|-----|-----------------------|----------|---------------------------|--------------|--------------------------------------|--------------------|--------------------|--------------------------|-----------------------|-----------------------------------------------------------------------------------------|
|     | 施設名                   | 郵便番号     | 住所（都道府県から記載）              | 電話番号         | ウェブサイトURL                            | 初診の電話等を用いた診療の実施の有無 | 再診の電話等を用いた診療の実施の有無 | 対応診療科                    | 担当医師名                 | 対面診療が必要と判断した場合に連携する医療機関名（複数ある場合は複数、住所も併せて記載）                                            |
| 388 | 聖母病院                  | 161-8521 | 東京都新宿区中落合2-5-1            | 03-3951-1111 | http://www.seibokai.or.jp            |                    | ○                  | 内科/皮膚科/耳鼻咽喉科/外科/乳腺外科     | 担当医師                  |                                                                                         |
| 389 | 高田馬場アイクリニック           | 169-0075 | 東京都新宿区高田馬場2-18-11 稲門ビル 2F | 03-6457-6661 | http://www.baba-eyeclinic.com/       | ○                  | ○                  | 眼科                       | 荒木 寿子                 | 東京医科大学病院<br>(〒160-0023 東京都新宿区西新宿6丁目7-1)<br>日本大学医学部附属板橋病院<br>(〒173-8610 東京都板橋区大谷口上町30-1) |
| 390 | 高橋医院                  | 169-0074 | 東京都新宿区北新宿3-21-8           | 03-3371-8064 |                                      | ○                  | ○                  | 内科                       | 高橋秀和                  | 国立国際医療研究センター病院（東京都新宿区戸山1-21-1）                                                          |
| 391 | 田中内科医院                | 160-0008 | 東京都新宿区四谷三栄町4-11 YSビル1階    | 03-3351-1815 |                                      | ○                  | ○                  | 内科<br>小児科                | 鹿井干城<br>櫻田光夫<br>田中由利子 |                                                                                         |
| 392 | たまきクリニック              | 160-0023 | 東京都新宿区西新宿1-12-12 河西ビル2階   | 03-3348-5888 |                                      |                    | ○                  | 心療内科<br>精神科              | 玉置 元                  |                                                                                         |
| 393 | 寺尾クリニカ                | 169-0073 | 東京都新宿区百人町3-25-5グランドヒルズA   | 03-5338-9955 | terao.clinica@brown.plala.or.jp      | ○                  | ○                  | 内科<br>心療内科アレルギー科<br>呼吸器科 | 寺尾 一郎                 |                                                                                         |
| 394 | 東京女子医科大学東洋医学研究所クリニック  | 162-8666 | 東京都新宿区河田町8番1号             | 03-6709-9021 | http://www.twmu.ac.jp/IOM/index.html |                    | ○                  | 漢方内科                     | 各医師                   |                                                                                         |
| 395 | 東京都保健医療公社<br>大久保病院    | 160-8488 | 東京都新宿区歌舞伎町2-44-1          | 03-5273-7711 | http://www.ohkubohospital.jp         |                    | ○                  | 概ね全診療科                   | 各医師                   |                                                                                         |
| 396 | 東京保健生活協同組合<br>江戸川橋診療所 | 162-0802 | 東京都新宿区改代町33番              | 03-3269-7855 | http://www//thoken.or.jp/edoshin//   |                    | ○                  | 内科                       | 柴原 昭典                 |                                                                                         |

電話や情報通信機器を用いて診療を実施する医療機関の一覧（東京都）

|     | 基本情報                |          |                                     |              |                                  | 事務連絡に基づく対応について     |                    |                                  |                   |                                                           |
|-----|---------------------|----------|-------------------------------------|--------------|----------------------------------|--------------------|--------------------|----------------------------------|-------------------|-----------------------------------------------------------|
|     | 施設名                 | 郵便番号     | 住所（都道府県から記載）                        | 電話番号         | ウェブサイトURL                        | 初診の電話等を用いた診療の実施の有無 | 再診の電話等を用いた診療の実施の有無 | 対応診療科                            | 担当医師名             | 対面診療が必要と判断した場合に連携する医療機関名（複数ある場合は複数、住所も併せて記載）              |
| 397 | 富久クロス眼科             | 162-0067 | 東京都新宿区富久町17-2富久クロス1F                | 03-3351-1131 | https://tomihisa-eye.jp/         |                    | ○                  | 眼科                               | 早水 扶公子            |                                                           |
| 398 | 富久こどもハート・アレルギークリニック | 162-0067 | 東京都新宿区富久町17-2                       | 03-5362-1810 | https://kodomo-heart.com/tomi/   | ○                  | ○                  | 小児科<br>アレルギー科<br>小児循環器内科         | 五十嵐 岳宏            | 国立国際医療研究センター（東京都新宿区戸山1-21-1）                              |
| 399 | なでしこ女性診療所           | 169-0075 | 東京都新宿区高田馬場1-1-1 メトロシティ西早稲田2F        | 03-6233-8228 | https://nadeshiko-women.com/     |                    | ○                  | 婦人科<br>皮膚科                       | 宮田 智子             | 国立国際医療研究センター<br>東京山手メディカルセンター<br>東京女子医大病院<br>東大病院         |
| 400 | 西新宿コンシェルリアクリニック     | 160-0023 | 東京都新宿区西新宿6-20-7コンシェルリア西新宿タワーズウエスト2階 | 03-5323-8112 | http://www.conciera-clinic.com   |                    | ○                  | 精神科                              | 金子 宏明             | 東京医大病院（東京都新宿区西新宿6-7-1）                                    |
| 401 | 西新宿さいとう眼科           | 160-0023 | 東京都新宿区西新宿1-5-11新宿三葉ビル7階             | 03-3343-8282 | http://www.hospita.jp            |                    | ○                  | 眼科                               | 齊藤 伸行 齊藤 康子 柴垣 三季 |                                                           |
| 402 | 西早稲田眼科              | 169-0075 | 東京都新宿区高田馬場1-1-1メトロシティ西早稲田2F         | 03-6380-2466 | https://wwec.jp                  |                    | ○                  | 眼科                               | 寺井 和都             |                                                           |
| 403 | 丹羽クリニック             | 169-0074 | 東京都新宿区北新宿1-8-17ヒジカタビル2F             | 03-3368-7587 |                                  | ○                  | ○                  | 内科<br>アレルギー科<br>消化器内科            | 丹羽 正幸             | 東京山手メディカルセンター（東京都新宿区百人町3-22-1）<br>大久保病院（東京都新宿区歌舞伎町2-44-1） |
| 404 | 抜弁天クリニック            | 162-0055 | 東京都新宿区余丁町8-7抜弁天ビル1階                 | 03-5919-1522 | http://www.nukebenten-clinic.com | ○                  | ○                  | 内科<br>小児科                        | 菊池 智津             | 国立国際医療研究センター（東京都新宿区戸山1-21-1）                              |
| 405 | ふたばクリニック            | 160-0017 | 東京都新宿区左門町20 四谷メディカルビル2階             | 03-3351-4133 | http://www.futaba-ent.jp/        | ○                  | ○                  | 耳鼻咽喉科<br>小児科（再診のみ）<br>泌尿器科（再診のみ） | 橋口一弘 綾美 咲 入江 啓    | 慶応病院（東京都新宿区）<br>北里研究所病院（東京都港区）                            |

電話や情報通信機器を用いて診療を実施する医療機関の一覧（東京都）

|     | 基本情報                |          |                            |              |                                                                                                   | 事務連絡に基づく対応について     |                    |                             |                                                       |                                                              |
|-----|---------------------|----------|----------------------------|--------------|---------------------------------------------------------------------------------------------------|--------------------|--------------------|-----------------------------|-------------------------------------------------------|--------------------------------------------------------------|
|     | 施設名                 | 郵便番号     | 住所（都道府県から記載）               | 電話番号         | ウェブサイトURL                                                                                         | 初診の電話等を用いた診療の実施の有無 | 再診の電話等を用いた診療の実施の有無 | 対応診療科                       | 担当医師名                                                 | 対面診療が必要と判断した場合に連携する医療機関名（複数ある場合は複数、住所も併せて記載）                 |
| 406 | 光眼科医院               | 169-0073 | 東京都新宿区百人町2-5-8 科研ビル203     | 03-3360-2240 |                                                                                                   | ○                  | ○                  | 眼科                          | 坊内 薫                                                  |                                                              |
| 407 | プライベートケアクリニック東京 新宿院 | 160-0032 | 東京都新宿区西新宿7-10-7加賀谷ビル3F     | 03-5337-6611 | <a href="https://pcct.jp/">https://pcct.jp/</a>                                                   | ○                  | ○                  | 性感染症内科                      | 鈴木 哲也<br>宮里 悠佑<br>中本 貴人<br>三須 恵太                      |                                                              |
| 408 | プライベートクリニック 高田馬場    | 169-0075 | 東京都新宿区高田馬場1-28-4-4F        | 03-6908-8515 | <a href="http://private-clinic.jp">private-clinic.jp</a>                                          | ○                  | ○                  | 内科・性感染症<br>内科・美容皮膚科         | 鏡原裕一・梯勇<br>希                                          |                                                              |
| 409 | ほそかわ内科クリニック         | 161-0035 | 東京都新宿区中井2-20-7             | 03-3952-4181 | <a href="http://hosokawa-naika-clinic.blogspot.jp/">http://hosokawa-naika-clinic.blogspot.jp/</a> | ○                  | ○                  | 内科                          | 細川芳文                                                  | 大久保病院（東京都新宿区歌舞伎町2-44-1）<br>聖母病院（東京都新宿区中落合2-5-1）              |
| 410 | まさご眼科               | 164-0004 | 東京都新宿区四谷1-3 高増屋ビル4F        | 03-3350-3681 | <a href="https://yotsuya.ganka.jp">https://yotsuya.ganka.jp</a>                                   |                    | ○                  | 眼科                          | 真砂 めぐみ                                                |                                                              |
| 411 | 丸尾眼科                | 165-0025 | 東京都新宿区高田馬場3-3-1 ユニオン駅前ビル3階 | 03-3361-0015 | <a href="http://www.maruoganka.com">http://www.maruoganka.com</a>                                 | ○                  | ○                  | 眼科                          | 丸尾敏之                                                  |                                                              |
| 412 | 三越診療所               | 160-0023 | 東京都新宿区西新宿1-24-1エステック情報ビル   | 03-3348-5791 | <a href="http://www.mhwh.or.jp/clinic/">http://www.mhwh.or.jp/clinic/</a>                         | ○                  | ○                  | 内科                          | 水野 杏一<br>山下 毅                                         | 国立国際医療研究センター病院（東京都新宿区戸山1-21-1）<br>日本医科大学付属病院（東京都文京区千駄木1-1-5） |
| 413 | ミラザ新宿つるかめクリニック      | 160-0022 | 東京都新宿区新宿3-36-10ミラザ新宿7階     | 03-6300-0063 | <a href="https://mirrazatsurukamekai.jp/index.html">https://mirrazatsurukamekai.jp/index.html</a> |                    | ○                  | 内科<br>消化器内科<br>糖尿病内科<br>婦人科 | 福島啓太<br>早瀬行治<br>杉原一明<br>加藤順子<br>福田達也<br>田嶋わか奈<br>佐野靖子 |                                                              |
| 414 | 目白ブライクリニック          | 161-0033 | 東京都新宿区下落合3-21-3Mコート目白1F    | 03-3565-5788 | <a href="http://mejiro-br.com">mejiro-br.com</a>                                                  | ○                  | ○                  | 内科<br>外科<br>肛門科<br>消化器科     | 正岡 直子                                                 |                                                              |

電話や情報通信機器を用いて診療を実施する医療機関の一覧（東京都）

|     | 基本情報       |          |                           |              |                                                                                                         | 事務連絡に基づく対応について     |                    |            |                          |                                                                    |
|-----|------------|----------|---------------------------|--------------|---------------------------------------------------------------------------------------------------------|--------------------|--------------------|------------|--------------------------|--------------------------------------------------------------------|
|     | 施設名        | 郵便番号     | 住所（都道府県から記載）              | 電話番号         | ウェブサイトURL                                                                                               | 初診の電話等を用いた診療の実施の有無 | 再診の電話等を用いた診療の実施の有無 | 対応診療科      | 担当医師名                    | 対面診療が必要と判断した場合に連携する医療機関名（複数ある場合は複数、住所も併せて記載）                       |
| 415 | 目白よしみクリニック | 161-0033 | 東京都新宿区下落合3-12-23 豊ビル1F    | 03-5988-7667 | <a href="http://yoshimi-clinic.com/">http://yoshimi-clinic.com/</a>                                     |                    | ○                  | 内科         | 金井 淑美                    |                                                                    |
| 416 | もりた眼科小児科   | 160-0004 | 東京都新宿区四谷1-6-1-205B コモレ四谷  | 03-6380-5363 | <a href="https://www.morita-eye.com/">https://www.morita-eye.com/</a>                                   | ○                  | ○                  | 小児科        | 森田 玲子                    |                                                                    |
| 417 | もりのぶ小児科    | 162-0812 | 東京都新宿区西五軒町8-10            | 03-6280-7158 | <a href="https://www.nobu-kids.jp/">https://www.nobu-kids.jp/</a>                                       | ○                  | ○                  | 小児科        | 森 伸生<br>栗田 富美子<br>五十川 真歩 | 国立国際医療センター病院（東京都新宿区戸山1-21-1）                                       |
| 418 | 薬王寺アイクリニック | 162-0063 | 東京都新宿区市谷薬王寺町70アルス市ヶ谷薬王寺1F | 03-5227-7230 | <a href="http://www.yakuoji-ic.jp/">http://www.yakuoji-ic.jp/</a>                                       |                    | ○                  | 眼科         | 高橋 真理子                   | 国立国際医療研究センター病院（東京都新宿区戸山1-21-1）<br>JCHO東京新宿メディカルセンター（東京都新宿区津久戸町5-1） |
| 419 | 四谷クリニック    | 160-0004 | 東京都新宿区四谷1-2-30第二中村ビル3F    | 03-3226-9028 |                                                                                                         | ○                  | ○                  | 内科         | 福岡 稔晃                    | 東京新宿メディカルセンター                                                      |
| 420 | 四谷・血管クリニック | 160-0004 | 東京都新宿区四谷1-8-14 四谷1丁目ビル2階  | 03-6380-6252 | <a href="https://www.yotsuya-kekkanclinic.com/">https://www.yotsuya-kekkanclinic.com/</a>               | ○                  | ○                  | 内科<br>血管外科 | 保坂 純郎                    |                                                                    |
| 421 | 若松河田クリニック  | 162-0054 | 東京都新宿区河田町10-7-201         | 03-6457-8351 | <a href="http://wakamatsukawadac.sakura.ne.jp/clinic/">http://wakamatsukawadac.sakura.ne.jp/clinic/</a> |                    | ○                  | 内科<br>小児科  | 松岡 瑠美子                   | 東京女子医科大学病院（東京都新宿区河田町8-1）<br>国立国際医療研究センター（東京都新宿区戸山1-21-1）           |
| 422 | 若松町整形外科    | 162-0056 | 東京都新宿区若松町10-1 日生ビル5F・6F   | 03-3207-5566 |                                                                                                         |                    | ○                  | 整形外科       | 清水 恒偉                    |                                                                    |
| 423 | 早稲田クリニック   | 162-0045 | 東京都新宿区馬場下町10早稲田レストハウス2F   | 03-3208-2007 | <a href="http://www.waseda-clinic.com">http://www.waseda-clinic.com</a>                                 | ○                  | ○                  | 内科         | 小西 洋之                    |                                                                    |

電話や情報通信機器を用いて診療を実施する医療機関の一覧（東京都）

|     | 基本情報                             |          |                                |              |                                                                                     | 事務連絡に基づく対応について     |                             |                 |                       |                                              |
|-----|----------------------------------|----------|--------------------------------|--------------|-------------------------------------------------------------------------------------|--------------------|-----------------------------|-----------------|-----------------------|----------------------------------------------|
|     | 施設名                              | 郵便番号     | 住所（都道府県から記載）                   | 電話番号         | ウェブサイトURL                                                                           | 初診の電話等を用いた診療の実施の有無 | 再診の電話等を用いた診療の実施の有無          | 対応診療科           | 担当医師名                 | 対面診療が必要と判断した場合に連携する医療機関名（複数ある場合は複数、住所も併せて記載） |
| 424 | 早稲田大学保健センター                      | 162-0041 | 東京都新宿区早稲田鶴巻町538-21             | 03-3202-0580 |                                                                                     |                    | ○<br>(本学教職員または学生のうち定期受診者のみ) | 内科<br>精神科       | 堀 正士<br>ほか20名         |                                              |
| 425 | 早稲田メンタルクリニック                     | 162-0042 | 東京都新宿区早稲田町69-4ウエステールワセダ5階      | 03-6233-9538 | <a href="https://wasedamental.com/">https://wasedamental.com/</a>                   | ○                  | ○                           | 精神科             | 益田 裕介                 |                                              |
| 426 | はらまちクリニック                        | 162-0053 | 東京都新宿区原町二丁目43番地                | 03-3341-8536 |                                                                                     |                    | ○                           | 小児科             | 山川 陽子                 |                                              |
| 427 | 加藤レディスクリニック                      | 160-0023 | 東京都新宿区西新宿7-20-3<br>ウエストゲート新宿ビル | 03-3366-3777 | <a href="https://www.towako-kato.com/">https://www.towako-kato.com/</a>             |                    | ○                           | 産婦人科            | 藤田 裕<br>佐藤 團<br>伊藤 正典 |                                              |
| 428 | マルファン・大動脈・ハートクリニック<br>青見循環器外科・内科 | 162-0052 | 東京都新宿区河田町7-1                   | 03-3208-9340 | <a href="https://www.marfan-aomi.jp">https://www.marfan-aomi.jp</a>                 | ○                  | ○                           | 循環器外科<br>循環器内科  | 青見茂之                  | 各県の大学病院や心臓外科のある病院                            |
| 429 | 余丁町皮フ科                           | 162-0055 | 東京都新宿区余丁町8-16<br>ネオメディアピア3階    | 03-5312-1211 | <a href="https://www.yochomachi-hifuka.com/">https://www.yochomachi-hifuka.com/</a> | ○                  | ○                           | 皮膚科             | 岩下 賢一                 |                                              |
| 430 | あいそめクリニック                        | 113-0022 | 東京都文京区千駄木3-40-17 CASA VERDE 2F | 03-6314-5944 | <a href="https://yanesen-kampo.jp">https://yanesen-kampo.jp</a>                     | ○                  |                             | 漢方内科            | 中西 幸子                 |                                              |
| 431 | 赤池耳鼻咽喉科                          | 112-0011 | 東京都文京区千石4-40-2                 | 03-5976-3355 | <a href="https://www.akaike-jibika.com">https://www.akaike-jibika.com</a><br>...    | ○                  | ○                           | 耳鼻咽喉科           | 赤池 洋                  |                                              |
| 432 | いいの耳鼻咽喉科                         | 113-0022 | 東京都文京区千駄木3-48-6                | 03-3828-3387 | <a href="https://www.iino-jibika.com/">https://www.iino-jibika.com/</a>             | ○                  | ○                           | 耳鼻咽喉科<br>アレルギー科 | 飯野 孝                  |                                              |



電話や情報通信機器を用いて診療を実施する医療機関の一覧（東京都）

|     | 基本情報                        |          |                                 |               |                                                                                     | 事務連絡に基づく対応について     |                    |                                |                                                    |                                              |
|-----|-----------------------------|----------|---------------------------------|---------------|-------------------------------------------------------------------------------------|--------------------|--------------------|--------------------------------|----------------------------------------------------|----------------------------------------------|
|     | 施設名                         | 郵便番号     | 住所（都道府県から記載）                    | 電話番号          | ウェブサイトURL                                                                           | 初診の電話等を用いた診療の実施の有無 | 再診の電話等を用いた診療の実施の有無 | 対応診療科                          | 担当医師名                                              | 対面診療が必要と判断した場合に連携する医療機関名（複数ある場合は複数、住所も併せて記載） |
| 433 | いいもりこころの診療所                 | 113-0024 | 東京都文京区西片1-3-18                  | 050-3734-5396 | <a href="https://www.psycocoro.org/">https://www.psycocoro.org/</a>                 |                    | ○                  | 精神科                            | 飯森真喜雄                                              |                                              |
| 434 | 猪狩医院                        | 113-0031 | 東京都文京区根津1-16-8-201              | 03-3822-4735  |                                                                                     | ○                  | ○                  | 内科                             | 山道博                                                |                                              |
| 435 | 石原医院                        | 112-0006 | 東京都文京区小日向1-6-6                  | 03-3941-8526  |                                                                                     | ○                  | ○                  | 内科・小児科                         | 藤原 陽子<br>藤原 圭                                      | JCHO東京新宿メディカルセンター<br>都立大塚病院<br>順天堂大学附属順天堂病院  |
| 436 | 一般財団法人近藤記念医学財団近藤記念医学財団富坂診療所 | 113-0033 | 東京都文京区本郷1丁目33-9                 | 03-3814-2662  | <a href="http://www.tomisaka.or.jp/">http://www.tomisaka.or.jp/</a>                 |                    | ○                  | 一般内科                           | 岡本 保 若林<br>香 小山 雄広<br>若井 布由子<br>柏木 佑介              |                                              |
| 437 | 一般財団法人慈愛会慈愛病院               | 113-0033 | 東京都文京区本郷6-12-5                  | 03-3812-7360  | <a href="http://www.jiaibyoin.or.jp/">http://www.jiaibyoin.or.jp/</a>               |                    | ○                  | 内科<br>皮膚科                      | 吉田 勝俊<br>小林 中<br>山道 紀子<br>松本 美緒                    | 日本医科大学付属病院（東京都文京区千駄木1-1-5）                   |
| 438 | 医療法人社団同友会春日クリニック            | 112-0002 | 東京都文京区小石川1-12-16TGビル            | 03-3813-0080  | <a href="http://www.do-yukai.com">http://www.do-yukai.com</a>                       |                    | ○                  | 内科                             | 当日の担当医                                             |                                              |
| 439 | 医療法人社団心緑会小石川メンタルクリニック       | 112-0012 | 東京都文京区大塚3-6-5 白井ビル1~4F          | 03-3943-5858  | <a href="http://www.koishikawa-mentalcl.com">http://www.koishikawa-mentalcl.com</a> |                    | ○                  | 精神科<br>心療内科                    | 白井 麻理                                              |                                              |
| 440 | 医療法人社団 静晴会山田胃腸科外科医院         | 113-0031 | 東京都文京区根津1-16-10                 | 03-3821-3381  | <a href="http://www.ymc.or.jp">http://www.ymc.or.jp</a>                             |                    | ○                  | 内科                             | 中村秀紀 渡邊<br>綾 佐々木隆 林<br>高則 井原涼子<br>吉田俊太郎<br>梅本朋幸 ほか |                                              |
| 441 | 医療法人社団静美会駒込かせだクリニック         | 113-0022 | 東京都文京区本駒込4-19-16<br>タウンハイム本駒込1F | 03-5832-5665  | <a href="http://www.kaseda-clinic.com/">http://www.kaseda-clinic.com/</a>           |                    | ○                  | 内科<br>脳神経内科<br>呼吸器内科<br>アレルギー科 | 加勢田 美恵子<br>加勢田 静<br>加勢田 幸子<br>岸田 修二                |                                              |

電話や情報通信機器を用いて診療を実施する医療機関の一覧（東京都）

|     | 基本情報                     |          |                            |              |                                             | 事務連絡に基づく対応について     |                    |                            |               |                                              |
|-----|--------------------------|----------|----------------------------|--------------|---------------------------------------------|--------------------|--------------------|----------------------------|---------------|----------------------------------------------|
|     | 施設名                      | 郵便番号     | 住所（都道府県から記載）               | 電話番号         | ウェブサイトURL                                   | 初診の電話等を用いた診療の実施の有無 | 再診の電話等を用いた診療の実施の有無 | 対応診療科                      | 担当医師名         | 対面診療が必要と判断した場合に連携する医療機関名（複数ある場合は複数、住所も併せて記載） |
| 442 | (医)千秋双葉会 茗荷谷耳鼻咽喉科・アレルギー科 | 112-0002 | 東京都文京区小石川5-5-2パンビビル2階      | 03-3944-8711 | http://myogadani-ent.com/                   | ○                  | ○                  | 耳鼻咽喉科                      | 長谷川 かおり       |                                              |
| 443 | 医療法人社団 藤翔会 加藤内科胃腸科クリニック  | 113-0021 | 東京都文京区本駒込6-1-21コロナ社第三ビル一階  | 03-5319-1470 | http://www.katoh-clinic.jp                  |                    | ○                  | 内科<br>小児科<br>胃腸内科<br>消化器内科 | 加藤 裕昭         | 寺田医院（文京区西方）                                  |
| 444 | 医療法人社団 中野小児科内科           | 113-0023 | 東京都文京区白山1-33-23ベルメゾン文京白山1F | 03-5805-8551 | https://www.nakano-shounikanaika.com/       |                    | ○                  | 内科<br>小児科                  | 中野圭介 中野起久恵    |                                              |
| 445 | 医療法人社団森谷会森谷医院            | 113-0022 | 東京都文京区千駄木5-43-11           | 03-3821-0128 | http://www.moritani-mc.com                  | ○                  | ○                  | 内科<br>小児科                  | 森谷茂樹          |                                              |
| 446 | 医療法人緑寿会 小林クリニック          | 112-0002 | 東京都文京区小石川3-16-19           | 03-5689-2025 | https://www.kobayashiclinic-koishikawa.com/ |                    | ○                  | 皮膚科<br>内科                  | 小林寿美子<br>畑佳納子 |                                              |
| 447 | 医療法人社団和幸会 上田医院           | 112-0013 | 東京都文京区音羽1丁目20-15           | 03-3943-0268 | https://ueta-medical-clinic.jimdofree.com/  |                    | ○                  | 内科循環器科                     | 上田 浩          | 東京新宿メディカルセンター（東京都新宿区津久戸町5-1）                 |
| 448 | うすだクリニック                 | 113-0033 | 東京都文京区本郷4-36-5             | 03-5840-8250 | http://www001.upp.sonet.ne.jp/usuda-c/      |                    | ○                  | 内科<br>小児科                  | 薄田康広          |                                              |
| 449 | 江戸川橋胃腸肛門クリニック            | 112-0014 | 東京都文京区関口1-19-6弥助ビル5F       | 03-3269-2020 | https://www.edb-ichou.com/                  |                    | ○                  | 胃腸科肛門科                     | 森 康治          |                                              |
| 450 | 江戸川橋さくらクリニック             | 112-0014 | 東京都文京区関口1-1-6              | 03-5227-3433 | http://edogawabashi-sakura-clinic.com/      | ○                  | ○                  | 内科<br>消化器内科                | 千葉 悦子         | 国立国際医療研究センター<br>東京新宿メディカルセンター                |

電話や情報通信機器を用いて診療を実施する医療機関の一覧（東京都）

|     | 基本情報             |          |                                |              |                                                                                         | 事務連絡に基づく対応について     |                    |                     |                                   |                                              |
|-----|------------------|----------|--------------------------------|--------------|-----------------------------------------------------------------------------------------|--------------------|--------------------|---------------------|-----------------------------------|----------------------------------------------|
|     | 施設名              | 郵便番号     | 住所（都道府県から記載）                   | 電話番号         | ウェブサイトURL                                                                               | 初診の電話等を用いた診療の実施の有無 | 再診の電話等を用いた診療の実施の有無 | 対応診療科               | 担当医師名                             | 対面診療が必要と判断した場合に連携する医療機関名（複数ある場合は複数、住所も併せて記載） |
| 451 | えなのさとクリニック       | 112-0012 | 東京都文京区大塚3-1-10-206             | 03-5976-3065 | <a href="https://www.enanosato.com/">https://www.enanosato.com/</a>                     | ○                  | ○                  | 内科、小児科、心療内科、皮膚科     | 福島幸江、山本享子                         |                                              |
| 452 | 大塚診療所            | 113-0034 | 東京都文京区湯島3-31-6                 | 03-3831-2294 | <a href="http://www.ohtsukaclinic.com/">http://www.ohtsukaclinic.com/</a>               | ○                  | ○                  | 内科<br>小児科<br>アレルギー科 | 大塚 宜一                             |                                              |
| 453 | 御茶ノ水聖橋クリニック      | 113-0034 | 東京都文京区湯島1-9-15                 | 03-5689-6811 | <a href="https://www.i-seitoukai.or.jp/">https://www.i-seitoukai.or.jp/</a>             | ○                  | ○                  | 内科・皮膚科・循環器科         | 林さなえ・橋本知加・林同文・今井靖・門前幸志郎・高木通乃・迫田智子 |                                              |
| 454 | 春日駅前あべファミリークリニック | 112-0002 | 東京都文京区小石川2-1-12<br>小石川トーセイビル6F | 03-3830-0395 | <a href="https://www.bunkyo-naika.com/">https://www.bunkyo-naika.com/</a>               | ○                  | ○                  | 内科<br>脳神経外科<br>整形外科 | 阿部 琢巳                             |                                              |
| 455 | 春日眼科             | 112-0002 | 東京都文京区小石川1-13-12               | 03-3815-0177 | <a href="http://www.kasugaeye.com">http://www.kasugaeye.com</a>                         | ○                  | ○                  | 眼科                  | 松井洋法                              |                                              |
| 456 | きたなかこども成長クリニック   | 113-0033 | 東京都文京区本郷2-37-6 稲毛屋ビル4階         | 03-3817-0976 | <a href="https://www.kitanaka-kidsgrowth.com/">https://www.kitanaka-kidsgrowth.com/</a> | ○                  | ○                  | 小児科                 | 北中幸子                              |                                              |
| 457 | 下司婦人科クリニック       | 113-0031 | 東京都文京区根津2-14-11 ツインズビル4階       | 03-5832-4122 | <a href="https://www.geshi-clinic.com/">https://www.geshi-clinic.com/</a>               |                    | ○                  | 産婦人科<br>内科          | 下司有美                              |                                              |
| 458 | 小石川循環器内科         | 112-0002 | 東京都文京区小石川2-24-14               | 03-6801-8450 | <a href="http://www.koishikawa-clinic.com">http://www.koishikawa-clinic.com</a>         | ○                  | ○                  | 内科                  | 鈴木 宏昌                             | 順天堂医院（東京都文京区本郷2-1-1）                         |
| 459 | 小石川柳町クリニック       | 112-0002 | 東京都文京区小石川1-13-9-103 クリオ文京小石川   | 03-5805-3749 | <a href="https://www.koishikawa-cl.com">https://www.koishikawa-cl.com</a>               | ○                  | ○                  | 小児科 内科              | 近藤 千里<br>近藤 光子                    | 都立大塚病院（〒170-8476 東京都豊島区南大塚2丁目8-1）            |

電話や情報通信機器を用いて診療を実施する医療機関の一覧（東京都）

|     | 基本情報            |          |                           |              |                                                 | 事務連絡に基づく対応について     |                    |                           |              |                                                                                                                    |
|-----|-----------------|----------|---------------------------|--------------|-------------------------------------------------|--------------------|--------------------|---------------------------|--------------|--------------------------------------------------------------------------------------------------------------------|
|     | 施設名             | 郵便番号     | 住所（都道府県から記載）              | 電話番号         | ウェブサイトURL                                       | 初診の電話等を用いた診療の実施の有無 | 再診の電話等を用いた診療の実施の有無 | 対応診療科                     | 担当医師名        | 対面診療が必要と判断した場合に連携する医療機関名（複数ある場合は複数、住所も併せて記載）                                                                       |
| 460 | 後楽園ウィメンズクリニック   | 113-0033 | 東京都文京区本郷1-33-8ハウス本郷ビル4階   | 03-5689-5500 | https://korakuen-womens.jp                      |                    | ○                  | 産婦人科                      | 佐々木 明香       |                                                                                                                    |
| 461 | こひなた眼科          | 112-0006 | 東京都文京区小日向2-10-3           | 03-3944-5566 | http://www.kohinata-eyeclinic.com               |                    | ○                  | 眼科<br>小児眼科                | 藤巻 拓郎        | 順天堂医院（東京都文京区本郷3-1-3）                                                                                               |
| 462 | こまごめ緑陰診療所       | 113-0021 | 東京都文京区本駒込5-19-2 小林ビルデンス2F | 03-3943-5525 | http://www.ryokuin.jp/                          |                    | ○                  | 心療内科<br>精神科               | 福田博文<br>福田陽明 |                                                                                                                    |
| 463 | 坂巻クリニック         | 112-0005 | 東京都文京区水道2-14-7            | 03-3941-6074 |                                                 | ○                  | ○                  | 内科                        | 坂巻 壽         | JCHO東京新宿メディカルセンター                                                                                                  |
| 464 | しおざわクリニック       | 112-0006 | 東京都文京区小日向4-4-3-103        | 03-3945-3711 | http://www//shiozwa-clinic.com                  | ○                  | ○                  | 内科<br>泌尿器科<br>皮膚科<br>形成外科 | 塩澤 真司        | 順天堂医院(東京都文京区本郷3丁目1-3)<br>都立大塚病院(東京都豊島区南大塚2丁目8-1)<br>JCHO東京新宿メディカルセンター(東京都新宿区津久戸町5-1)<br>東京通信病院（東京都千代田区富士見2丁目14-23） |
| 465 | 順天堂大学医学部附属順天堂医院 | 113-8431 | 東京都文京区本郷3-1-3             | 03-3813-3111 | https://www.juntendo.ac.jp/hospital/            | ○                  | ○                  | 初診：一部診療科<br>再診：全診療科       | 各医師          |                                                                                                                    |
| 466 | 心陽クリニック         | 113-0033 | 東京都文京区本郷2-29-3 UK'sビル3F   | 03-6801-6160 | http://www.shinyo.pro/contents/services/clinic/ | ○                  | ○                  | 内科                        | 石田陽子         |                                                                                                                    |
| 467 | 水道橋ひふ科クリニック     | 113-0033 | 東京都文京区本郷1-14-4 AU南陽堂ビル1階  | 03-5684-4112 | https://suido-hihu.com/                         | ○                  | ○                  | 皮膚科                       | 神島輪          |                                                                                                                    |
| 468 | すずき医院           | 112-0015 | 東京都文京区目白台1-23-7-101       | 03-3941-1590 | http://www1.odn.ne.jp/suzuki-iiin               | ○                  | ○                  | 内科<br>小児科                 | 和智 行夫        |                                                                                                                    |

電話や情報通信機器を用いて診療を実施する医療機関の一覧（東京都）

|     | 基本情報         |          |                               |              |                                                                                 | 事務連絡に基づく対応について     |                    |                    |                               |                                                              |
|-----|--------------|----------|-------------------------------|--------------|---------------------------------------------------------------------------------|--------------------|--------------------|--------------------|-------------------------------|--------------------------------------------------------------|
|     | 施設名          | 郵便番号     | 住所（都道府県から記載）                  | 電話番号         | ウェブサイトURL                                                                       | 初診の電話等を用いた診療の実施の有無 | 再診の電話等を用いた診療の実施の有無 | 対応診療科              | 担当医師名                         | 対面診療が必要と判断した場合に連携する医療機関名（複数ある場合は複数、住所も併せて記載）                 |
| 469 | 鈴木医院         | 113-0021 | 東京都文京区本駒込2-28-35              | 03-3941-6615 |                                                                                 |                    | ○                  | 内科                 | 鈴木弘之                          |                                                              |
| 470 | 須田整形外科クリニック  | 112-0004 | 東京都文京区後楽2-23-15               | 03-3811-0881 |                                                                                 | ○                  | ○                  | 整形外科<br>内科         | 須田 均                          | JCHO東京新宿メディカルセンター（新宿区津久戸町5-1）<br>順天堂大学医学部附属順天堂医院（文京区本郷3-1-3） |
| 471 | 千駄木みしま眼科     | 113-0031 | 東京都文京区根津2-37-4 グランドメゾン根津1階    | 03-5834-7559 | <a href="https://mishimaganka.com/">https://mishimaganka.com/</a>               | ○                  | ○                  | 眼科                 | 三嶋明香                          |                                                              |
| 472 | タツノ内科・循環器科   | 113-0033 | 東京都文京区本郷5-1-16 B1F            | 03-5800-0203 | <a href="http://www.tatsuno-clinic.com">http://www.tatsuno-clinic.com</a>       |                    | ○                  | 内科<br>循環器科         | 龍野 勝彦                         |                                                              |
| 473 | 団子坂くつろぎクリニック | 113-0022 | 東京都文京区千駄木5-21-12カサデコリーナ1階     | 03-5834-7702 | <a href="http://www.kojikai.com">http://www.kojikai.com</a>                     | ○                  | ○                  | 内科<br>アレルギー科       | 高野夏希<br>岡本友喜<br>野呂林太郎<br>加藤泰裕 |                                                              |
| 474 | 千晶こどもクリニック   | 112-0002 | 東京都文京区小石川1-24-3               | 03-3868-0703 | <a href="http://chiaki-childrenclinic.com">http://chiaki-childrenclinic.com</a> | ○                  | ○                  | 小児科                | 中井 千晶                         |                                                              |
| 475 | 寺田医院         | 113-0024 | 東京都文京区西片1-2-3                 | 03-3812-1821 |                                                                                 | ○                  | ○                  | 内科 循環器科<br>皮膚科     | 弓 幸史                          | 加藤内科胃腸科（千石）八千代診療所（白山）他基幹病院                                   |
| 476 | 寺本内科歯科クリニック  | 113-0033 | 東京都文京区本郷5-25-13               | 03-5684-0818 | <a href="http://termoto-mdc.com">termoto-mdc.com</a>                            |                    | ○                  | 内科                 | 寺本民生<br>脇裕則<br>若栗稔子           | 帝京大学病院（東京都板橋区）<br>東大病院（東京都文京区）                               |
| 477 | 伝通院クリニック     | 112-0006 | 東京都文京区小日向4丁目6番18号ステラメゾン茗荷谷201 | 03-6912-1565 | <a href="https://dentsuin.jp/">https://dentsuin.jp/</a>                         | ○                  | ○                  | 内科<br>小児科<br>耳鼻咽喉科 | 善積秀幸                          |                                                              |

電話や情報通信機器を用いて診療を実施する医療機関の一覧（東京都）

|     | 基本情報                  |          |                          |              |                                                                                                                             | 事務連絡に基づく対応について     |                    |                                                                                                               |                                                                                            |                                                                                                                                                                                               |
|-----|-----------------------|----------|--------------------------|--------------|-----------------------------------------------------------------------------------------------------------------------------|--------------------|--------------------|---------------------------------------------------------------------------------------------------------------|--------------------------------------------------------------------------------------------|-----------------------------------------------------------------------------------------------------------------------------------------------------------------------------------------------|
|     | 施設名                   | 郵便番号     | 住所（都道府県から記載）             | 電話番号         | ウェブサイトURL                                                                                                                   | 初診の電話等を用いた診療の実施の有無 | 再診の電話等を用いた診療の実施の有無 | 対応診療科                                                                                                         | 担当医師名                                                                                      | 対面診療が必要と判断した場合に連携する医療機関名（複数ある場合は複数、住所も併せて記載）                                                                                                                                                  |
| 478 | 東京医科歯科大学医学部附属病院       | 113-8519 | 東京都文京区湯島1-5-45           | 03-3813-6111 | <a href="http://www.tmd.ac.jp/medhospital/topics/tel/index.html">http://www.tmd.ac.jp/medhospital/topics/tel/index.html</a> |                    | ○                  | 血液内科、膠原病・リウマチ内科、糖尿病・内分泌・代謝内科、腎臓内科、総合診療科、消化器内科、循環器内科、呼吸器内科、緩和ケア科、食道外科、胃外科、大腸・肛門外科、消化器化学療法外科、乳腺外科、小児外科、皮膚科、泌尿器科 | 各科において対応                                                                                   | 東京北医療センター（東京都北区赤羽4-17-56）小児科<br>練馬光が丘病院（東京都練馬区光が丘2-11-1）小児科<br>武蔵野赤十字病院（東京都武蔵野市境南町1-26-1）小児科<br>土浦協同病院（茨城県土浦市おおつ野4-4-1）小児科<br>JAとりで総合医療センター（茨城県取手市本郷2-1-1）小児科<br>川口市立医療センター（埼玉県川口市西新井宿180）小児科 |
| 479 | 東京健生病院                | 112-0012 | 東京都文京区大塚4-3-8            | 03-3944-6111 | <a href="http://www.thoken.or.jp/kensei/">http://www.thoken.or.jp/kensei/</a>                                               |                    | ○                  | 内科<br>外科<br>整形外科<br>皮膚科<br>腎臓病<br>消化器<br>糖尿病<br>循環器                                                           | 根岸京田、山崎広樹、加藤冠、岩下直樹、佐藤研路、小金丸千景、加藤貴、高岡和彦、松本剛、泉智子、谷口直知子、吉井                                    | 大泉生協病院                                                                                                                                                                                        |
| 480 | 東京大学医学部附属病院           | 113-8655 | 東京都文京区本郷7-3-1            | 03-3815-5411 | <a href="https://www.h.u-tokyo.ac.jp/">https://www.h.u-tokyo.ac.jp/</a>                                                     |                    | ○                  | かかりつけ診療科のみ                                                                                                    | 主治医                                                                                        |                                                                                                                                                                                               |
| 481 | 東京都立駒込病院              | 113-8677 | 東京都文京区本駒込三丁目18番22号       | 03-3823-2101 | <a href="http://www.cick.jp/">http://www.cick.jp/</a>                                                                       |                    | ○                  | 全科                                                                                                            | 各担当医                                                                                       |                                                                                                                                                                                               |
| 482 | 東京保健生活協同組合セツルメント菊坂診療所 | 112-0002 | 東京都文京区小石川1-24-3          | 03-3812-0016 | <a href="http://www.thoken.or.jp/kikusaka">http://www.thoken.or.jp/kikusaka</a>                                             |                    | ○                  | 内科                                                                                                            | 伊藤恵子<br>福間由美子                                                                              |                                                                                                                                                                                               |
| 483 | 東都文京病院                | 113-0034 | 東京都文京区湯島三丁目5番7号          | 03-3831-2181 | <a href="https://www.tohtobunkyo-hp.com/">https://www.tohtobunkyo-hp.com/</a>                                               |                    | ○                  | 内科・心療内科・泌尿器科・外科・整形外科・眼科・産婦人科・小児科・皮膚科・耳鼻咽喉科                                                                    | 藤博紀、十妻大介、藤田恵、齊藤美奈子、野中英彰、新井政代、平尾龍彦、井上玲子、矢崎由紀、建石綾子、石井聡、三浦雅臣、山口聡子、常吉秀男、河野史歩、小原啓子、山川仁子、山下和子、日下 |                                                                                                                                                                                               |
| 484 | 内藤クリニック               | 113-0022 | 東京都文京区千駄木4-14-10-2F      | 03-5685-2455 |                                                                                                                             |                    | ○                  | 精神科                                                                                                           | 内藤 志朗                                                                                      |                                                                                                                                                                                               |
| 485 | 中村クリニック               | 112-0002 | 東京都文京区小石川3-27-6コスモ小石川103 | 03-3818-7677 | <a href="mailto:clinic@nakamura.or.jp">clinic@nakamura.or.jp</a>                                                            |                    | ○                  | 消化器外科<br>内科                                                                                                   | 中村宏                                                                                        |                                                                                                                                                                                               |
| 486 | 似鳥クリニック               | 113-0031 | 東京都文京区根津1-19-11          | 03-3827-1181 | <a href="https://www.nitadori.com/">https://www.nitadori.com/</a>                                                           |                    | ○                  | 呼吸器内科<br>循環器内科<br>小児科<br>脳神経外科                                                                                | 似鳥純一<br>服部和紀                                                                               | 東京大学医学部附属病院（東京都文京区本郷7-3-1）<br>三井記念病院（東京都千代田区神田和泉町1）                                                                                                                                           |

電話や情報通信機器を用いて診療を実施する医療機関の一覧（東京都）

|     | 基本情報                       |          |                            |              |                                                                                             | 事務連絡に基づく対応について     |                    |                                     |                    |                                              |
|-----|----------------------------|----------|----------------------------|--------------|---------------------------------------------------------------------------------------------|--------------------|--------------------|-------------------------------------|--------------------|----------------------------------------------|
|     | 施設名                        | 郵便番号     | 住所（都道府県から記載）               | 電話番号         | ウェブサイトURL                                                                                   | 初診の電話等を用いた診療の実施の有無 | 再診の電話等を用いた診療の実施の有無 | 対応診療科                               | 担当医師名              | 対面診療が必要と判断した場合に連携する医療機関名（複数ある場合は複数、住所も併せて記載） |
| 487 | にわ医院                       | 113-0022 | 東京都文京区千駄木4-8-12            | 03-3824-0482 |                                                                                             | ○                  | ○                  | 内科<br>小児科                           | 丹羽 明               |                                              |
| 488 | 白山レディースクリニック               | 112-0001 | 東京都文京区白山5-36-9 白山麻の実ビル9F   | 03-5689-3070 | <a href="https://hakusanladies.com/">https://hakusanladies.com/</a>                         | ○                  | ○                  | 婦人科                                 | 中村 久基              |                                              |
| 489 | はりまざかクリニック<br>耳鼻咽喉科・アレルギー科 | 112-0012 | 東京都文京区大塚1-5-18<br>大伴ビル9階A号 | 03-6304-1510 | <a href="https://harimazaka.clinic">https://harimazaka.clinic</a>                           | ○                  | ○                  | 耳鼻咽喉科<br>小児耳鼻咽喉科<br>アレルギー科          | 三輪 正人              |                                              |
| 490 | 日原内科クリニック                  | 113-0022 | 東京都文京区千駄木2-13-1-2F         | 03-3822-6262 | <a href="http://hihara-naika.byoinnavi.jp/pc/">http://hihara-naika.byoinnavi.jp/pc/</a>     |                    | ○                  | 内科<br>小児科                           | 日原義文               |                                              |
| 491 | ふくだ皮ふ科                     | 112-0002 | 東京都文京区小石川3-35-11           | 03-3868-2229 | <a href="https://fukuda-hifu.jp">https://fukuda-hifu.jp</a>                                 | ○                  | ○                  | 皮膚科                                 | 福田理永               |                                              |
| 492 | 藤原クリニック                    | 113-0022 | 東京都文京区千駄木3-2-7リエス千駄木1階地下1階 | 03-3821-3767 | <a href="https://fujiwara-cl.jp/">https://fujiwara-cl.jp/</a>                               | ○                  | ○                  | 内科<br>呼吸器内科<br>循環器内科<br>心療内科<br>精神科 | 藤原直之               | 藤原クリニック                                      |
| 493 | 文京動坂診療所                    | 113-0022 | 東京都文京区千駄木4-15-3            | 03-3822-9680 | <a href="http://www.bunkyo-dozaaka.dr-clinic.jp">http://www.bunkyo-dozaaka.dr-clinic.jp</a> |                    | ○                  | 内科                                  | 五藤忠、岩澤邦明、明城正博、砂金秀章 |                                              |
| 494 | 文京内科・循環器クリニック              | 113-0021 | 東京都文京区本駒込2-10-3-4F         | 03-6304-1567 | <a href="https://www.bunkyo-cl.jp/">https://www.bunkyo-cl.jp/</a>                           | ○                  | ○                  | 内科<br>循環器内科<br>糖尿病内科                | 藤原聡                | 日本医科大学附属病院(東京都文京区千駄木1-1-5)                   |
| 495 | 保坂子どもクリニック                 | 112-0001 | 東京都文京区白山5-27-12            | 03-3946-0641 | <a href="http://hosaka-kodomo.com">http://hosaka-kodomo.com</a>                             | ○                  | ○                  | 小児科                                 | 保坂 篤人              |                                              |

電話や情報通信機器を用いて診療を実施する医療機関の一覧（東京都）

|     | 基本情報         |          |                           |              |                                           | 事務連絡に基づく対応について     |                    |                            |                        |                                                                                 |
|-----|--------------|----------|---------------------------|--------------|-------------------------------------------|--------------------|--------------------|----------------------------|------------------------|---------------------------------------------------------------------------------|
|     | 施設名          | 郵便番号     | 住所（都道府県から記載）              | 電話番号         | ウェブサイトURL                                 | 初診の電話等を用いた診療の実施の有無 | 再診の電話等を用いた診療の実施の有無 | 対応診療科                      | 担当医師名                  | 対面診療が必要と判断した場合に連携する医療機関名（複数ある場合は複数、住所も併せて記載）                                    |
| 496 | 細部医院         | 113-0031 | 東京都文京区根津1-1-19-2階         | 03-3822-6858 | www.hosobeclinic.jp                       |                    | ○                  | 泌尿器科                       | 細部 高英                  | 日本医科大学付属病院(文京区千駄木1-1-5)                                                         |
| 497 | 細部小児科クリニック   | 113-0031 | 東京都文京区根津2-14-11 ツインビル2階   | 03-6303-3162 | http://www.hosobe-kodomo.com/             | ○                  | ○                  | 小児科                        | 細部千晴                   | 東大病院（文京区本郷7-3-1）<br>日医大（文京区千駄木1-1-5）<br>順天堂病院（文京区本郷3-1-3）<br>医科歯病院（文京区湯島1-5-45） |
| 498 | 本郷耳鼻咽喉科クリニック | 113-0033 | 東京都文京区本郷4-2-8フローラビルディング2階 | 03-5689-4133 | http://www.hongoent.com/                  | ○                  | ○                  | 耳鼻咽喉科、アレルギー科               | 木村美和子                  |                                                                                 |
| 499 | 本郷台皮膚科       | 113-0033 | 東京都文京区本郷5-1-15 安野ビル3F     | 03-3812-4112 | http://www.toda.jp/hongoudai/             |                    | ○                  | 皮膚科                        | 上田 純嗣                  |                                                                                 |
| 500 | 本駒込耳鼻咽喉科     | 113-0021 | 東京都文京区本駒込3-17-2 木村ビル2階    | 03-3827-1187 | https://www.honkomagome-jibi.com/         | ○                  | ○                  | 耳鼻咽喉科<br>小児耳鼻咽喉科           | 吉越 彬                   |                                                                                 |
| 501 | 松本医院         | 113-0021 | 東京都文京区本駒込5-4-1-11 青木ビル1階  | 03-5832-9518 | matsumoto-iinn.com                        |                    | ○<br>電話またはFAXのみ対応  | 内科<br>小児科<br>皮膚科<br>アレルギー科 | 松本 正隆                  |                                                                                 |
| 502 | 三浦内科クリニック    | 112-0015 | 東京都文京区目白台2-12-5           | 03-5319-3321 | http://www.miuranaikabunkyo.sakura.ne.jp/ |                    | ○                  | 内科                         | 三浦 誠司                  |                                                                                 |
| 503 | 光永クリニック      | 112-0011 | 東京都文京区千石4-4-1             | 03-3943-0270 | http://www.mitsunagaclinic.com/           |                    | ○                  | 内科<br>小児科                  | 光永 文<br>光永 真人<br>光永 真之 |                                                                                 |
| 504 | 茗荷谷キッズクリニック  | 112-0012 | 東京都文京区大塚3-1-6ラ・トゥール小石川B1F | 03-5976-3077 | http://myogadani-kids.com/                | ○                  | ○                  | 小児科<br>アレルギー科              | 有馬慶太郎                  | 都立大塚病院（東京都豊島区南大塚2丁目8番1号）                                                        |



電話や情報通信機器を用いて診療を実施する医療機関の一覧（東京都）

|     | 基本情報             |          |                             |              |                                   | 事務連絡に基づく対応について     |                    |                |       |                                              |
|-----|------------------|----------|-----------------------------|--------------|-----------------------------------|--------------------|--------------------|----------------|-------|----------------------------------------------|
|     | 施設名              | 郵便番号     | 住所（都道府県から記載）                | 電話番号         | ウェブサイトURL                         | 初診の電話等を用いた診療の実施の有無 | 再診の電話等を用いた診療の実施の有無 | 対応診療科          | 担当医師名 | 対面診療が必要と判断した場合に連携する医療機関名（複数ある場合は複数、住所も併せて記載） |
| 505 | 茗荷谷なかむらクリニック     | 112-0006 | 東京都文京区小日向4-5-16 ツインヒルズ茗荷谷1階 | 03-3945-6161 | http://myogadani-cl.jp/           | ○                  | ○                  | 内科             | 中村 陽一 |                                              |
| 506 | 茗荷谷乳腺クリニック       | 112-0012 | 東京都文京区大塚1-5-18大伴ビル4階        | 03-5981-8288 | https://breast-cl.com             | ○                  | ○                  | 乳腺外科           | 氷室 貴規 |                                              |
| 507 | 茗荷谷レディースクリニック    | 112-0002 | 東京都文京区小石川5-3-4-3階           | 03-3830-0495 | https://myogadani-ladies.com/     |                    | ○                  | 産婦人科           | 河合有希  |                                              |
| 508 | みらいメディカルクリニック茗荷谷 | 112-0012 | 東京都文京区大塚1-4-15-202          | 03-3943-0123 | http://www.mirai-mc.com           | ○                  | ○                  | 内科<br>小児科      | 濱口 玲央 |                                              |
| 509 | 三輪医院             | 112-0011 | 東京都文京区千石4-26-8              | 03-5976-9933 | https://miwaclinic.jimdofree.com/ | ○                  | ○                  | 内科             | 三輪一彦  |                                              |
| 510 | むらい内科・循環器クリニック   | 113-0022 | 東京都文京区千駄木3-4-3-3ATK千駄木ビル1階  | 03-3822-8010 | http://murai-clinic.com/          | ○                  | ○                  | 内科<br>循環内科     | 村井 綱児 |                                              |
| 511 | めぐみクリニック         | 112-0012 | 東京都文京区大塚3-1-6-3A            | 03-5981-8990 | http://megumi-cl.com              |                    | ○                  | 精神科            | 皆川 恵子 |                                              |
| 512 | 森こどもクリニック        | 112-0002 | 東京都文京区5-40-21               | 03-5803-7887 |                                   | ○                  | ○                  | 小児科<br>アレルギー科  | 森 蘭子  |                                              |
| 513 | 八千代診療所           | 113-0001 | 東京都文京区白山1-5-8               | 03-3811-4519 |                                   | ○                  | ○                  | 内科・精神科・<br>小児科 | 井上博和  |                                              |

電話や情報通信機器を用いて診療を実施する医療機関の一覧（東京都）

|     | 基本情報               |          |                                |                               |                                  | 事務連絡に基づく対応について     |                    |                      |             |                                                                                                                                                                                              |
|-----|--------------------|----------|--------------------------------|-------------------------------|----------------------------------|--------------------|--------------------|----------------------|-------------|----------------------------------------------------------------------------------------------------------------------------------------------------------------------------------------------|
|     | 施設名                | 郵便番号     | 住所（都道府県から記載）                   | 電話番号                          | ウェブサイトURL                        | 初診の電話等を用いた診療の実施の有無 | 再診の電話等を用いた診療の実施の有無 | 対応診療科                | 担当医師名       | 対面診療が必要と判断した場合に連携する医療機関名（複数ある場合は複数、住所も併せて記載）                                                                                                                                                 |
| 514 | ゆき医院               | 106-0031 | 東京都文京区本郷5-26-2 東大赤門前ビル3階       | 03-5840-8660                  | http://www.yuki-mcl.jp/          | ○                  | ○                  | 内科                   | 大田由己子       | 東京大学附属病院（東京都文京区本郷7-3-1）<br>駒込病院（東京都文京区本駒込3-18-22）<br>日本医科大学（東京都文京区千駄木1-1-5）                                                                                                                  |
| 515 | ようようインターナショナルクリニック | 112-0003 | 東京都文京区春日2-11-8-304             | 03-3946-5886<br>090-8375-2601 | https://yyic.jp/index.html       | ○                  | ○                  | 内科                   | 楊 陽<br>陳 莉薇 | 1. 聖路加国際病院（東京都中央区明石町9-1）<br>2. 医療法人医新会 医新クリニック（東京都板橋区大山町23-1）<br>3. 医療法人菅沼会 腎内科クリニック世田谷（東京都世田谷区南烏山4-21-14）<br>4. 医療法人環会 東京ネクスト内科・透析クリニック（東京都荒川区西日暮里2丁目22-1）<br>5. 横浜市立大学附属 市民総合医療センター（横浜市中区） |
| 516 | 良田眼科               | 211-0002 | 東京都文京区小石川4-21-2 ハイッ小石川2F       | 03-3816-1300                  | yoshida-ganka-bunkyo.com         | ○                  | ○                  | 眼科                   | 良田 夕里子      |                                                                                                                                                                                              |
| 517 | りくぎえん皮膚科           | 113-0021 | 東京都文京区本駒込6-2-1 栄泉堂ビル301        | 03-6912-0812                  | http://rikugien-hifuka.com/      |                    | ○                  | 皮膚科                  | 二神 綾子       | 日本医科大学付属病院                                                                                                                                                                                   |
| 518 | わたなべ皮膚科            | 130-0001 | 東京都文京区日山1-33-16 パークコートプレイスビル4F | 03-3830-8080                  | watanabe-skin.jp                 | ○                  | ○                  | 皮膚科                  | 渡邊 荘子       |                                                                                                                                                                                              |
| 519 | 谷口医院               | 113-0021 | 東京都文京区本駒込2-8-11                | 03-5395-7760                  | http://www.taniguchi-iin.com/    | ○                  | ○                  | 内科                   | 谷口 善郎       |                                                                                                                                                                                              |
| 520 | 浅草胃腸肛門クリニック        | 111-0033 | 東京都台東区花川戸1-2-4 7F              | 03-3845-7800                  | https://asakusaiichoukoumon.com/ |                    | ○                  | 大腸・肛門外科、胃腸内科         | 佐藤兼俊、原聖佳 他  |                                                                                                                                                                                              |
| 521 | あさくさ橋心臓と血管のクリニック   | 111-0053 | 東京都台東区浅草橋1-18-9 山上ビル2階         | 03-6240-9286                  | https://acvc.jp/                 | ○                  | ○                  | 心臓内科<br>血管内科<br>血管外科 | 高橋保裕        |                                                                                                                                                                                              |
| 522 | いりやキッズクリニック        | 110-0004 | 東京都台東区下谷3-11-12                | 03-5808-0415                  | http://iriyakids.com/            |                    | ○                  | 小児科<br>アレルギー科        | 浅野 由美子      |                                                                                                                                                                                              |

電話や情報通信機器を用いて診療を実施する医療機関の一覧（東京都）

|     | 基本情報                   |          |                       |              |                                                                                     | 事務連絡に基づく対応について     |                    |                          |                                    |                                                                                |
|-----|------------------------|----------|-----------------------|--------------|-------------------------------------------------------------------------------------|--------------------|--------------------|--------------------------|------------------------------------|--------------------------------------------------------------------------------|
|     | 施設名                    | 郵便番号     | 住所（都道府県から記載）          | 電話番号         | ウェブサイトURL                                                                           | 初診の電話等を用いた診療の実施の有無 | 再診の電話等を用いた診療の実施の有無 | 対応診療科                    | 担当医師名                              | 対面診療が必要と判断した場合に連携する医療機関名（複数ある場合は複数、住所も併せて記載）                                   |
| 523 | 医療法人社団一順会田村胃腸科外科       | 110-0012 | 東京都台東区竜泉3-42-11       | 03-3874-9981 |                                                                                     | ○                  | ○                  | 内科                       | 田村順二                               |                                                                                |
| 524 | 医療法人社団永明会一宮メンタルクリニック   | 110-0005 | 東京都台東区上野6-1-1小西本店ビル4F | 03-5817-4824 | <a href="https://i-mc.jp">https://i-mc.jp</a>                                       | ○                  | ○                  | 精神科<br>心療内科              | 各主治医                               |                                                                                |
| 525 | 医療法人社団尾泉会つちやファミリークリニック | 110-0013 | 東京都台東区入谷2-25-2-1F     | 03-3873-1375 | <a href="http://tsuchiya-family-clinic.com/">http://tsuchiya-family-clinic.com/</a> | ○                  | ○                  | 内科<br>小児科<br>皮膚科         | 土屋 晶義<br>土屋 佳奈                     | 永寿総合病院（東京都台東区東上野2-23-16）<br>台東区立台東病院（東京都台東区千束3-20-5）<br>浅草寺病院（東京都台東区浅草2-30-17） |
| 526 | 医療法人社団菊和会谷中クリニック       | 110-0001 | 東京都台東区谷中3-13-10       | 03-3823-1261 |                                                                                     | ○                  | ○                  | 内科<br>小児科<br>外科・肛門科      | 竹入 正彦                              |                                                                                |
| 527 | 医療法人社団輝生会たいとう診療所       | 111-0041 | 東京都台東区元浅草1-16-17      | 03-5828-8051 | <a href="http://www.motoasakusa-reha.com">http://www.motoasakusa-reha.com</a>       | ○                  | ○                  | 内科<br>神経内科<br>リハビリテーション科 | 斉木 三鈴<br>吉村 菜穂子<br>菊地 サエ子<br>中島 勇二 | 左院                                                                             |
| 528 | 医療法人社団道草会浜田クリニック       | 110-0015 | 東京都台東区東上野3-36-1       | 03-3832-5426 |                                                                                     |                    | ○                  | 精神科                      | 梶原 徹                               |                                                                                |
| 529 | 医療法人社団ルーチェ会佐々木医院       | 111-0032 | 東京都台東区浅草5-33-12       | 03-3872-6776 | <a href="http://www.sasakiin-luce.jjp">http://www.sasakiin-luce.jjp</a>             | ○                  | ○                  | 婦人科<br>内科                | 佐々木 貴子                             | 東京慈恵医科大学柏病院（柏市柏下163-1）                                                         |
| 530 | 上野睡眠クリニック              | 110-0005 | 東京都台東区上野7-6-5-9F      | 03-5830-5951 | <a href="http://ueno5951.com">http://ueno5951.com</a>                               |                    | ○                  | 内科（睡眠時無呼吸症候群）            | 古賀 達夫                              |                                                                                |
| 531 | 浦尾医院                   | 110-0003 | 東京都台東区根岸5-17-6        | 03-3875-0242 | <a href="https://www.uraoiin-ioukai.com/">https://www.uraoiin-ioukai.com/</a>       | ○                  | ○                  | 耳鼻咽喉科                    | 浦尾弥須子<br>浦尾正彦<br>若林健一郎             |                                                                                |

電話や情報通信機器を用いて診療を実施する医療機関の一覧（東京都）

|     | 基本情報              |          |                            |              |                              | 事務連絡に基づく対応について     |                    |                                                |                                                                   |                                              |
|-----|-------------------|----------|----------------------------|--------------|------------------------------|--------------------|--------------------|------------------------------------------------|-------------------------------------------------------------------|----------------------------------------------|
|     | 施設名               | 郵便番号     | 住所（都道府県から記載）               | 電話番号         | ウェブサイトURL                    | 初診の電話等を用いた診療の実施の有無 | 再診の電話等を用いた診療の実施の有無 | 対応診療科                                          | 担当医師名                                                             | 対面診療が必要と判断した場合に連携する医療機関名（複数ある場合は複数、住所も併せて記載） |
| 532 | 永寿総合病院 柳橋分院       | 111-0052 | 東京都台東区柳橋2-20-4             | 03-3851-9375 | http://www.yanagibashihp.com | ○                  | ○                  | 内科は初再診<br>整形外科は再診のみ                            | 内科初診は米丸、初再診は米丸、和田、藤井/整形外科は全医師                                     |                                              |
| 533 | 小川眼科診療所           | 110-0005 | 東京都台東区上野2-11-6             | 03-3831-0588 | www.ogawa-ganka.jp           | ○                  | ○                  | 眼科<br>精神科<br>皮膚科                               | 加藤美名子<br>板村論子                                                     |                                              |
| 534 | 北島クリニック           | 110-0005 | 東京都台東区上野1-16-16 第2三倉ビル3F   | 03-5807-6160 | http://www.kitajima-cl.com   |                    | ○                  | 精神科<br>心療内科                                    | 北島潤一郎                                                             |                                              |
| 535 | 社会福祉法人 浅草寺病院      | 111-0032 | 東京都台東区浅草2丁目30番17号          | 03-3841-3330 | https://www.sensoji-h.or.jp/ |                    | ○                  | 内科<br>外科<br>整形外科<br>小児科<br>眼科<br>耳鼻咽喉科<br>泌尿器科 | 黒田 忠英<br>宮木 陽子<br>増田 陽子<br>田村 英一郎<br>眼科担当医<br>耳鼻咽喉科担当医<br>泌尿器科担当医 |                                              |
| 536 | ストレスケア東京上野駅前クリニック | 110-0005 | 東京都台東区上野7-7-7 早稲田ビルディング6階  | 03-3842-7730 | https://tokyoueno.com/       |                    | ○                  | 心療内科<br>精神科                                    | 細川 大雅<br>緒方 優                                                     | 東京大学医学部附属病院（東京都文京区本郷7-3-1）                   |
| 537 | ぞうさん内科クリニック       | 110-0015 | 東京都台東区東上野2丁目22-5旭ビル1階101号室 | 03-3837-7775 | https://www.zousannaika.com  | ○                  | ○                  | 内科                                             | 森山 賢一                                                             |                                              |
| 538 | たまおか眼科            | 110-0005 | 東京都台東区上野2-7-13-3F          | 03-5812-3270 | tamaoka-eyeclinic.com        |                    | ○                  | 眼科                                             | 玉岡 容子                                                             |                                              |
| 539 | 東京トータルライフクリニック    | 111-0034 | 東京都台東区雷門2-6-3ユニカ雷門ビル2階     | 03-5806-9871 | http://tlc.or.jp/            | ○                  | ○                  | 内科                                             | 穴水聡一郎 長屋直樹 藤純一郎 千葉宙門                                              |                                              |
| 540 | 同善会クリニック          | 110-0011 | 東京都台東区三ノ輪2-12-12           | 03-3801-6180 | http://www.dozen-hp.com      |                    | ○                  | 総合診療科                                          | 増田 浩三                                                             |                                              |

電話や情報通信機器を用いて診療を実施する医療機関の一覧（東京都）

|     | 基本情報                         |          |                                  |              |                                      | 事務連絡に基づく対応について     |                    |                         |                 |                                                                            |
|-----|------------------------------|----------|----------------------------------|--------------|--------------------------------------|--------------------|--------------------|-------------------------|-----------------|----------------------------------------------------------------------------|
|     | 施設名                          | 郵便番号     | 住所（都道府県から記載）                     | 電話番号         | ウェブサイトURL                            | 初診の電話等を用いた診療の実施の有無 | 再診の電話等を用いた診療の実施の有無 | 対応診療科                   | 担当医師名           | 対面診療が必要と判断した場合に連携する医療機関名（複数ある場合は複数、住所も併せて記載）                               |
| 541 | みうら眼科・皮フ科クリニック               | 110-0012 | 東京都台東区竜泉2-19-18 クリニックステーション三ノ輪1F | 03-6458-1050 | http://miuraclinic-taitoku.jp        | ○                  | ○                  | 眼科                      | 三浦 克洋           |                                                                            |
| 542 | 三倉クリニック                      | 110-0005 | 東京都台東区上野1-16-16第2三倉ビル1F          | 03-5807-8171 | http://www.mikura-clinic.net/        | ○                  | ○                  | 呼吸器内科<br>循環器内科<br>消化器内科 | 倉持晋久            | 三井記念病院（東京都千代田区神田和泉1番地）                                                     |
| 543 | 吉岡整形外科クリニック                  | 111-0053 | 東京都台東区浅草橋1-10-6 1階               | 03-5822-5563 | http://www.yoshioka-seikeigeka.com   |                    | ○                  | 整形外科クリニック               | 吉岡 利孝           |                                                                            |
| 544 | 吉野眼科クリニック                    | 110-0005 | 東京都台東区上野1-20-10 風月堂本社ビル6階        | 03-3839-5092 | https://www.yoshino-eye-clinic.com/  | ○                  | ○                  | 眼科                      | 吉野 健一<br>中島 希和子 | 日本医科大学付属病院（文京区）<br>東京大学医学部附属病院（文京区）<br>慶応義塾大学病院（新宿区）<br>日本大学医学部附属板橋病院（板橋区） |
| 545 | 医療法人社団ナイズキャップクリニック錦糸町        | 130-0022 | 東京都墨田区江東橋4-27-14 錦糸町パルコ7F        | 03-4579-2973 | https://www.caps-clinic.jp/kinshicho | ○                  | ○                  | 小児科                     | 菅本 健司           |                                                                            |
| 546 | 吾嬬医院                         | 131-0043 | 東京都墨田区立花5-26-8                   | 03-3612-3475 | azuma-iin.webmedipr.jp               |                    | ○                  | 内科                      | 揚 志成            |                                                                            |
| 547 | 医療法人社団草思会クボタクリニック            | 130-0003 | 東京都墨田区横川3-2-4                    | 03-3623-2011 | https://www.kubocli.jp/yokokawa/     |                    | ○                  | 精神科<br>心療内科             | 安達洋一<br>その他主治医  |                                                                            |
| 548 | 医療法人社団草思会錦糸町クボタクリニック         | 130-0013 | 東京都墨田区錦糸3-5-1                    | 03-3623-3031 | https://www.kubocli.jp/kinshichou/   |                    | ○                  | 精神科<br>心療内科             | 窪田彰<br>その他主治医   |                                                                            |
| 549 | 医療法人社団中央白報会総合クリニックドクターランド錦糸町 | 130-0012 | 東京都墨田区太平4-1-2 オリナス・モール4F         | 03-5809-7389 | http://dr-land-kinshicho.com/        |                    | ○                  | 内科                      | 二見 良平           |                                                                            |

電話や情報通信機器を用いて診療を実施する医療機関の一覧（東京都）

|     | 基本情報            |          |                          |               |                                                                                                                   | 事務連絡に基づく対応について     |                    |                                    |                                                                       |                                                       |
|-----|-----------------|----------|--------------------------|---------------|-------------------------------------------------------------------------------------------------------------------|--------------------|--------------------|------------------------------------|-----------------------------------------------------------------------|-------------------------------------------------------|
|     | 施設名             | 郵便番号     | 住所（都道府県から記載）             | 電話番号          | ウェブサイトURL                                                                                                         | 初診の電話等を用いた診療の実施の有無 | 再診の電話等を用いた診療の実施の有無 | 対応診療科                              | 担当医師名                                                                 | 対面診療が必要と判断した場合に連携する医療機関名（複数ある場合は複数、住所も併せて記載）          |
| 550 | 医療法人社団 立圭会平野医院  | 131-0043 | 東京都墨田区立花6-1-14           | 090-3084-3441 | <a href="https://rickay.com">https://rickay.com</a>                                                               |                    | ○                  | 内科小児科                              | 平野 圭                                                                  |                                                       |
| 551 | 押上駅前 松浦内科クリニック  | 131-0045 | 東京都墨田区押上1-11-5 菅野ビル1・2階  | 03-5637-9388  | <a href="http://www.matsuura-medical-clinic.org/">http://www.matsuura-medical-clinic.org/</a>                     | ○                  | ○                  | 内科、呼吸器内科、内分泌代謝内科、循環器内科、消化器内科、耳鼻咽喉科 | 松浦 崇行<br>鈴木 慎太郎<br>三國 肇子<br>渡部 ちづる<br>近藤 誠太<br>後藤 唯子<br>森 智明<br>藤居 直和 | 昭和大学江東豊洲病院（東京都江東区）<br>東京曳舟病院（東京都墨田区）<br>あそか病院（東京都江東区） |
| 552 | おしあげ耳鼻咽喉科       | 130-0003 | 東京都墨田区横川3-11-14 マツマルビル2F | 03-3622-2633  | <a href="http://oshiage.sho-jin.com/">http://oshiage.sho-jin.com/</a>                                             | ○                  | ○                  | 耳鼻科                                | 山田 哲也                                                                 |                                                       |
| 553 | 梶原病院            | 131-0031 | 東京都墨田区墨田3-31-12          | 03-3614-2255  | <a href="http://www.kajiwara-hospital.com">http://www.kajiwara-hospital.com</a>                                   |                    | ○                  | 内科<br>整形                           | 梶原 宗介                                                                 | 東京慈恵会医科大学葛飾医療センター（東京都葛飾区青戸6-41-2）                     |
| 554 | 唐澤医院            | 130-0023 | 東京都墨田区立川1-12-13          | 03-3631-2336  | <a href="http://www.ne.jp/asahi/karasawa/clinic/index.html">http://www.ne.jp/asahi/karasawa/clinic/index.html</a> | ○                  | ○                  | 小児科・内科                             | 唐澤 賢祐                                                                 |                                                       |
| 555 | 木村医院            | 131-0031 | 東京都墨田区墨田5-35-6           | 03-3618-5501  | <a href="https://medical-clinic-6705.business.site/">https://medical-clinic-6705.business.site/</a>               | ○                  | ○                  | 内科<br>小児科                          | 木村 揚                                                                  |                                                       |
| 556 | 錦糸町子どもクリニック     | 130-0013 | 東京都墨田区錦糸3-14-9-1階        | 03-3625-7727  | <a href="https://kinshicho-kodomo.com">https://kinshicho-kodomo.com</a>                                           |                    | ○                  | 小児科                                | 西口 康介                                                                 |                                                       |
| 557 | 京成曳舟耳鼻科皮膚科クリニック | 131-0041 | 東京都墨田区八広1-15-2           | 03-6661-8140  | <a href="https://keiseiclinic.jp/">https://keiseiclinic.jp/</a>                                                   | ○                  | ○                  | 耳鼻科<br>皮膚科                         | 久保 伸夫<br>渡邊 恒輔                                                        |                                                       |
| 558 | 湘南メディカル記念病院     | 130-0026 | 東京都墨田区両国二丁目21番1号         | 0120-979-097  | <a href="https://www.sbc-hospital.jp/">https://www.sbc-hospital.jp/</a>                                           | ○                  | ○                  | 内科                                 | 加藤 貴志<br>春山 晋                                                         |                                                       |

電話や情報通信機器を用いて診療を実施する医療機関の一覧（東京都）

|     | 基本情報            |          |                             |              |                                                                                         | 事務連絡に基づく対応について     |                    |                            |                |                                                                          |
|-----|-----------------|----------|-----------------------------|--------------|-----------------------------------------------------------------------------------------|--------------------|--------------------|----------------------------|----------------|--------------------------------------------------------------------------|
|     | 施設名             | 郵便番号     | 住所（都道府県から記載）                | 電話番号         | ウェブサイトURL                                                                               | 初診の電話等を用いた診療の実施の有無 | 再診の電話等を用いた診療の実施の有無 | 対応診療科                      | 担当医師名          | 対面診療が必要と判断した場合に連携する医療機関名（複数ある場合は複数、住所も併せて記載）                             |
| 559 | 隅田川診療所          | 131-0033 | 東京都墨田区向島1-24-6              | 03-3626-5100 |                                                                                         | ○                  | ○                  | 内科 小児科<br>皮膚科              | 山室 学           |                                                                          |
| 560 | 積善会医院           | 131-0032 | 東京都墨田区東向島6-6-13             | 03-3614-3629 |                                                                                         | ○                  | ○                  | 内科、整形外科                    | 吉村 宏<br>木場 ともえ |                                                                          |
| 561 | 立花クリニック         | 131-0043 | 東京都墨田区立花1-23-3-101          | 03-3616-8216 | <a href="https://www.tachibana-cl.or.jp">https://www.tachibana-cl.or.jp</a>             |                    | ○                  | 内科                         | 島田 憲明          |                                                                          |
| 562 | 東京シティクリニック両国    | 130-0021 | 東京都墨田区緑1-14-4両国TYビル9階       | 03-5638-3377 | <a href="https://tokyocityclinic-ryogoku.com/">https://tokyocityclinic-ryogoku.com/</a> | ○                  | ○                  | 内科、乳腺外科                    | 吉井             | 東京都立墨東病院（〒130-8575 東京都墨田区江東橋4-23-15）<br>杏雲堂病院（〒101-0062 東京都千代田区神田駿河台1-8） |
| 563 | とうきょうスカイツリー駅前内科 | 131-0033 | 東京都墨田区向島3-33-13 リョービビル401号室 | 03-5809-7660 | <a href="https://skytrees-clinic.jp/">https://skytrees-clinic.jp/</a>                   | ○                  | ○                  | 内科                         | 金子俊之<br>河野晋也   | 順天堂大学医学部付属順天堂医院（東京都文京区本郷3-1-3）                                           |
| 564 | 東京都リハビリテーション病院  | 131-0034 | 東京都墨田区堤通2-14-1              | 03-3616-8600 | <a href="http://www.tokyo-reha.jp/">http://www.tokyo-reha.jp/</a>                       |                    | ○                  | リハビリテーション科<br>整形外科<br>泌尿器科 | 各医師            |                                                                          |
| 565 | 東京曳舟病院          | 131-0032 | 東京都墨田区東向島2-27-1             | 03-5655-1120 | <a href="https://tokyo-hikifune-hp.jp/">https://tokyo-hikifune-hp.jp/</a>               |                    | ○                  | 総合診療科                      | 山本保博           |                                                                          |
| 566 | 同愛記念病院          | 130-8587 | 東京都墨田区横網2-1-11              | 03-3625-6381 | <a href="http://www.doai.jp/">http://www.doai.jp/</a>                                   |                    | ○                  | 全科                         |                |                                                                          |
| 567 | 西大島あたらし眼科       | 136-0072 | 東京都江東区大島3-14-17江口ビル2F       | 03-5858-8861 | <a href="https://www.atarashi-ganka.com/">https://www.atarashi-ganka.com/</a>           |                    | ○                  | 眼科                         | 新 卓也           | 江東病院（東京都江東区大島6丁目8-5）<br>墨東病院（東京都墨田区江東橋4丁目23-15）                          |

電話や情報通信機器を用いて診療を実施する医療機関の一覧（東京都）

|     | 基本情報           |          |                                 |               |                                                                                     | 事務連絡に基づく対応について     |                    |             |                        |                                              |
|-----|----------------|----------|---------------------------------|---------------|-------------------------------------------------------------------------------------|--------------------|--------------------|-------------|------------------------|----------------------------------------------|
|     | 施設名            | 郵便番号     | 住所（都道府県から記載）                    | 電話番号          | ウェブサイトURL                                                                           | 初診の電話等を用いた診療の実施の有無 | 再診の電話等を用いた診療の実施の有無 | 対応診療科       | 担当医師名                  | 対面診療が必要と判断した場合に連携する医療機関名（複数ある場合は複数、住所も併せて記載） |
| 568 | 日伸駅前クリニック      | 130-0022 | 東京都墨田区江東橋3-10-8錦糸町スクエアビル5階      | 03-3634-9033  | <a href="https://hikifune-kids.com">https://hikifune-kids.com</a>                   |                    | ○                  | 内科<br>人工透析  | 森山 君子                  | 森山記念病院（東京都江戸川区北葛西4-3-1）                      |
| 569 | ひきふねこどもクリニック   | 131-0046 | 東京都墨田区京島1-39-1 曳舟西ビューハイツ1F店舗122 | 03-3618-1111  | <a href="https://hikifune-kids.com">https://hikifune-kids.com</a>                   |                    | ○                  | 小児科         | 高田 昌亮                  |                                              |
| 570 | 増田耳鼻咽喉科        | 131-0032 | 東京都墨田区東向島6-6-2                  | 03-3611-8733  | <a href="http://www.masuda-jibika.jp/">http://www.masuda-jibika.jp/</a>             |                    | ○                  | 耳鼻咽喉科       | 増田 正純<br>阿部 実恵子        |                                              |
| 571 | 宮田内科クリニック      | 130-0011 | 東京都墨田区石原3-19-1 早川ビル1階           | 03-6666-5266  | <a href="http://www.miyata-naika.jp/">http://www.miyata-naika.jp/</a>               |                    | ○                  | 内科<br>消化器内科 | 宮田達也                   |                                              |
| 572 | 八広同仁会クリニック     | 131-0041 | 東京都墨田区八広6-29-14                 | 03-3619-4471  | <a href="http://yahirodouzinkai-clinic.com/">http://yahirodouzinkai-clinic.com/</a> | ○                  | ○                  | 内科小児科泌尿器科   | 佐々木 美和                 | 同愛記念病院（東京都墨田区横綱2-1-11）                       |
| 573 | 両国医院           | 130-0014 | 東京都墨田区亀沢2-11-14                 | 03-3624-3366  |                                                                                     |                    | ○                  | 内科<br>小児科   | 伊能高明・<br>伊能容子          |                                              |
| 574 | 両国駅前内科・透析クリニック | 130-0026 | 東京都墨田区両国2-21-8両国駅前ビル4階          | 050-5865-5610 | <a href="https://www.ryogoku-dialysis.jp/">https://www.ryogoku-dialysis.jp/</a>     | ○                  | ○                  | 内科          | 木村庄吾                   |                                              |
| 575 | 両国東口クリニック      |          | 東京都墨田区両国3-21-1                  | 130-0026      | <a href="http://www.higasiguti.jp/">http://www.higasiguti.jp/</a>                   |                    | ○                  | リウマチ科<br>内科 | 大山 博司<br>諸見里 仁<br>藤森 新 |                                              |
| 576 | ガーデンプラザ石井クリニック | 131-0034 | 東京都墨田区堤通1-19-11                 | 03-3616-1413  |                                                                                     |                    | ○                  | 内科          | 石井 達男                  |                                              |



電話や情報通信機器を用いて診療を実施する医療機関の一覧（東京都）

|     | 基本情報                     |          |                                   |              |                                                                                                         | 事務連絡に基づく対応について     |                    |             |       |                                              |
|-----|--------------------------|----------|-----------------------------------|--------------|---------------------------------------------------------------------------------------------------------|--------------------|--------------------|-------------|-------|----------------------------------------------|
|     | 施設名                      | 郵便番号     | 住所（都道府県から記載）                      | 電話番号         | ウェブサイトURL                                                                                               | 初診の電話等を用いた診療の実施の有無 | 再診の電話等を用いた診療の実施の有無 | 対応診療科       | 担当医師名 | 対面診療が必要と判断した場合に連携する医療機関名（複数ある場合は複数、住所も併せて記載） |
| 577 | 赤羽根医院                    | 136-0074 | 東京都江東区東砂2-1-15                    | 03-3648-3622 | <a href="https://www.akahaneclinic.com/">https://www.akahaneclinic.com/</a>                             | ○                  | ○                  | 内科<br>小児科   | 赤羽根 巖 | 江東病院（東京都江東区大島6-8-5）                          |
| 578 | 有明こどもクリニック有明院            | 135-0063 | 東京都江東区有明1-4-11-1階                 | 03-3599-0415 | <a href="https://child-clinic.or.jp">https://child-clinic.or.jp</a>                                     | ○                  | ○                  | 小児科 内科      | 小暮 裕之 |                                              |
| 579 | 有明こどもクリニック豊洲院            | 135-0061 | 東京都江東区豊洲5-5-25-1F                 | 03-6204-2733 | <a href="https://clinicclinic.or.jp">https://clinicclinic.or.jp</a>                                     | ○                  | ○                  | 内科小児科アレルギー科 | 村上典子  | 昭和大学江東豊洲病院 聖路加国際病院                           |
| 580 | いよりこどもクリニック              | 135-0062 | 東京都江東区東雲 1-9-10 イオン東雲ショッピングセンター2階 | 03-6221-3448 | <a href="http://www.shujii.com/0362213448/">http://www.shujii.com/0362213448/</a>                       |                    | ○                  | 小児科         | 伊従秀章  |                                              |
| 581 | 医療法人社団大島小児科医院            | 136-0072 | 東京都江東区大島8-5-2N&Hビル1, 2階           | 03-5609-7631 | <a href="http://www.oojimahospital.com/">http://www.oojimahospital.com/</a>                             | ○                  | ○                  | 小児科、アレルギー科  | 成高信一  | 江東病院（東京都江東区大島6-8-5）都立墨東病院                    |
| 582 | 医療法人社団 共咲会 サワイメディカルクリニック | 136-0073 | 東京都江東区北砂6-27-17                   | 03-3615-0606 | <a href="http://sawaimedicalclinic.net">http://sawaimedicalclinic.net</a>                               |                    | ○                  | 内科          | 金田 竜真 |                                              |
| 583 | 医療法人社団弘大会 五の橋こどもクリニック    | 136-0071 | 東京都江東区亀戸6-14-3 1F                 | 03-5858-8011 | <a href="http://www.gonohashi-kodomo.com">http://www.gonohashi-kodomo.com</a>                           | ○                  | ○                  | 小児科<br>内科   | 大塚 正弘 | 東京都立墨東病院（東京都墨田区江東橋4-23-15）                   |
| 584 | 医療法人社団祥宏会鈴木医院            | 136-0076 | 東京都江東区南砂1-9-9                     | 03-3644-0749 | <a href="http://www004.upp.sonet.ne.jp/suzuki-clinic/">http://www004.upp.sonet.ne.jp/suzuki-clinic/</a> | ○                  | ○                  | 内科<br>小児科   | 鈴木良一  |                                              |
| 585 | 医療法人社団高裕会 深川立川病院         | 135-0011 | 東京都江東区扇橋2-2-3                     | 03-3645-2101 | <a href="http://www.tachikawa-hospital.jp">http://www.tachikawa-hospital.jp</a>                         | ○                  | ○                  | 内科          | 立川 裕理 |                                              |

電話や情報通信機器を用いて診療を実施する医療機関の一覧（東京都）

|     | 基本情報                         |          |                                  |              |                                                                                             | 事務連絡に基づく対応について     |                    |                                   |                |                                              |
|-----|------------------------------|----------|----------------------------------|--------------|---------------------------------------------------------------------------------------------|--------------------|--------------------|-----------------------------------|----------------|----------------------------------------------|
|     | 施設名                          | 郵便番号     | 住所（都道府県から記載）                     | 電話番号         | ウェブサイトURL                                                                                   | 初診の電話等を用いた診療の実施の有無 | 再診の電話等を用いた診療の実施の有無 | 対応診療科                             | 担当医師名          | 対面診療が必要と判断した場合に連携する医療機関名（複数ある場合は複数、住所も併せて記載） |
| 586 | 医療法人社団浩成会<br>なむら整形外科         | 135-0005 | 東京都江東区高橋14-3盛市ビル4階               | 03-3631-8833 | <a href="https://www.nakamura-seikeigeka.or.jp/">https://www.nakamura-seikeigeka.or.jp/</a> | ○                  | ○                  | 整形外科                              | 中村 浩           |                                              |
| 587 | 医療法人社団TIK<br>大手町さくらクリニックin豊洲 | 135-0061 | 東京都江東区豊洲3-2-20 豊洲フロント2F          | 03-6219-5688 | <a href="http://oscl.jp/">http://oscl.jp/</a>                                               | ○                  | ○                  | 内科                                | 西山 寿子          |                                              |
| 588 | 医療法人社団桃医会小野<br>内科診療所         | 136-0072 | 東京都江東区大島1-33-15 小野ビル1階           | 03-3636-5505 | <a href="https://www.ononaika-cardiogp.com/">https://www.ononaika-cardiogp.com/</a>         | ○                  | ○                  | 内科、循環器内科                          | 小野 卓哉          |                                              |
| 589 | 医療法人社団<br>ひらの亀戸ひまわり診療所       | 136-0071 | 東京都江東区亀戸7-10-1<br>Zビル2F          | 03-5609-1823 | <a href="https://www.himawari-clinic.jp/">https://www.himawari-clinic.jp/</a>               | ○                  | ○                  | 内科<br>小児科                         | 毛利 一平          |                                              |
| 590 | 医療法人社団藤崎病院                   | 136-0076 | 東京都江東区南砂1-25-11                  | 03-3648-2111 | <a href="http://www.fujisaki-hp.com">http://www.fujisaki-hp.com</a>                         |                    | ○                  | 外科<br>内科<br>脳神経外科<br>整形外科<br>泌尿器科 | 全ての医師          |                                              |
| 591 | 医療法人社団 平生会<br>神原医院           | 136-0073 | 東京都江東区北砂7-3-17                   | 03-3645-7351 |                                                                                             |                    | ○                  | 内科<br>小児科                         | 神原 礼文<br>成瀬 勝俊 | 医療法人社団寿康会<br>寿康会病院                           |
| 592 | 永代クリニック                      | 135-0034 | 東京都江東区永代2-37-22永代クリニックビル1F       | 03-3641-3055 | <a href="http://eitai-clinic.com">http://eitai-clinic.com</a>                               | ○                  | ○                  | 内科                                | 金 民日           |                                              |
| 593 | 大島駅前クリニック                    | 136-0072 | 東京都江東区大島5-10-10-セントラルプラザ大島<br>1階 | 03-5626-3777 | <a href="mailto:clinic@ojima-ekimae.jp">clinic@ojima-ekimae.jp</a>                          | ○                  | ○                  | 内科<br>胃腸内科                        | 近藤 健司          |                                              |
| 594 | 大島耳鼻咽喉科・アレルギー科               | 136-0072 | 東京都江東区大島5-10-10 セントラルプラザ大島<br>4F | 03-5626-1133 | <a href="http://www.ojima-ent.com">http://www.ojima-ent.com</a>                             |                    | ○                  | 耳鼻咽喉科・アレルギー科                      | 寺田修久 植草<br>康浩  | 昭和大学江東豊洲病院                                   |

電話や情報通信機器を用いて診療を実施する医療機関の一覧（東京都）

|     | 基本情報             |          |                                   |              |                                                                                                     | 事務連絡に基づく対応について     |                    |                  |               |                                               |
|-----|------------------|----------|-----------------------------------|--------------|-----------------------------------------------------------------------------------------------------|--------------------|--------------------|------------------|---------------|-----------------------------------------------|
|     | 施設名              | 郵便番号     | 住所（都道府県から記載）                      | 電話番号         | ウェブサイトURL                                                                                           | 初診の電話等を用いた診療の実施の有無 | 再診の電話等を用いた診療の実施の有無 | 対応診療科            | 担当医師名         | 対面診療が必要と判断した場合に連携する医療機関名（複数ある場合は複数、住所も併せて記載）  |
| 595 | 医療法人社団<br>おかの小児科 | 135-0045 | 東京都江東区古石場2-14-1ウェルタワー深川・<br>医療モール | 03-5621-2336 | <a href="http://home.catv.ne.jp/pp/oknc/nc/top.html">http://home.catv.ne.jp/pp/oknc/nc/top.html</a> | ○                  | ○                  | 小児科              | 岡野 周子         |                                               |
| 596 | オビ内科クリニック        | 135-0052 | 東京都江東区潮見2-1-10                    | 03-5665-6770 | <a href="http://obi-clinic.com">http://obi-clinic.com</a>                                           |                    | ○                  | 内科<br>小児科        | 小尾 直美         |                                               |
| 597 | 笠井小児クリニック        | 136-0072 | 東京都江東区大島9-5-1-103                 | 03-3636-2577 |                                                                                                     | ○                  | ○                  | 内科<br>小児科        | 笠井 秀明         | 江東病院（東京都江東区大島6-8-5）                           |
| 598 | かしわぎクリニック        | 135-0047 | 東京都江東区東雲1-9-21-102                | 03-3532-6600 | <a href="https://www.kashiwagi-clinic.jp">https://www.kashiwagi-clinic.jp</a>                       |                    | ○                  | 内科 皮膚科           | 柏木 明          |                                               |
| 599 | 亀戸キッズクリニック       | 136-0071 | 東京都江東区亀戸2-42-5 2F                 | 03-5875-3387 | <a href="http://www.kameido-kids.com/">http://www.kameido-kids.com/</a>                             | ○                  | ○                  | 小児科              | 杉本 佳乃         |                                               |
| 600 | 亀戸水神森クリニック       | 136-0071 | 東京都江東区亀戸6-57-20 亀戸東口駅前ビル2<br>階    | 03-5658-6767 | <a href="http://www.suijinmori.com">http://www.suijinmori.com</a>                                   | ○                  | ○                  | 内科               | 金光 裕幸         |                                               |
| 601 | 亀戸中央通りクリニック      | 136-0071 | 東京都江東区亀戸5-20-23ホフハガワー階            | 03-5628-6531 |                                                                                                     | ○                  | ○                  | 内科               | 王 国定<br>神戸 正樹 |                                               |
| 602 | 亀戸内科クリニック        | 136-0071 | 東京都江東区亀戸2-26-8-風月堂ビル1F            | 03-5626-5600 | <a href="http://kameido-naika.com/">http://kameido-naika.com/</a>                                   | ○                  | ○                  | 内科               | 荒木 正          |                                               |
| 603 | 北原診療所            | 136-0073 | 東京都江東区北砂5-16-1                    | 03-5632-1991 | <a href="http://www.ne.jp/asahi/kitahara/clinic/">http://www.ne.jp/asahi/kitahara/clinic/</a>       | ○                  | ○                  | 内科<br>小児科<br>皮膚科 | 松元明子          | 江東病院（東京都江東区大島6-8-5）<br>墨東病院（東京都墨田区江東橋4-23-15） |

電話や情報通信機器を用いて診療を実施する医療機関の一覧（東京都）

|     | 基本情報                 |          |                       |              |                                                                                                   | 事務連絡に基づく対応について     |                    |                                                              |                  |                                              |
|-----|----------------------|----------|-----------------------|--------------|---------------------------------------------------------------------------------------------------|--------------------|--------------------|--------------------------------------------------------------|------------------|----------------------------------------------|
|     | 施設名                  | 郵便番号     | 住所（都道府県から記載）          | 電話番号         | ウェブサイトURL                                                                                         | 初診の電話等を用いた診療の実施の有無 | 再診の電話等を用いた診療の実施の有無 | 対応診療科                                                        | 担当医師名            | 対面診療が必要と判断した場合に連携する医療機関名（複数ある場合は複数、住所も併せて記載） |
| 604 | 清澄白河子どもクリニック         | 135-0022 | 東京都江東区三好3-1-3         | 03-5602-9119 | <a href="http://www.shujii.com/56029119/i/">http://www.shujii.com/56029119/i/</a>                 | ○                  | ○                  | 小児科                                                          | 名越 廉<br>名越 涼子    |                                              |
| 605 | 医療法人社団駿圭美会水谷皮膚科クリニック | 163-0072 | 東京都江東区大島1-1-5 VIP大島2階 | 03-5628-2770 | <a href="https://mizutani-hifuka.com/">https://mizutani-hifuka.com/</a>                           | ○                  | ○                  | 皮膚科                                                          | 水谷 治子            |                                              |
| 606 | 協和メディカルクリニック         | 136-0073 | 東京都江東区北砂2-15-40       | 03-3648-4131 | <a href="https://www.aiiku-med.or.jp/kyowa.html">https://www.aiiku-med.or.jp/kyowa.html</a>       |                    | ○                  | 内科                                                           | 細野 紫麻子           |                                              |
| 607 | 公益財団法人がん研究会有明病院      | 135-8550 | 東京都江東区有明3-8-31        | 03-3520-0111 | <a href="https://www.jfcr.or.jp/hospital/">https://www.jfcr.or.jp/hospital/</a>                   |                    | ○                  | 呼吸器内科<br>消化器内科<br>乳腺内科<br>血液内科<br>腫瘍内科<br>漢方内科<br>精神科<br>皮膚科 | 各診療科担当医師         |                                              |
| 608 | 小林クリニック              | 136-0072 | 東京都江東区大島4-1-6-105     | 03-3684-0481 |                                                                                                   |                    | ○                  | 内科                                                           | 小林功<br>小林昭夫      |                                              |
| 609 | 小林内科クリニック            | 135-0011 | 東京都江東区扇橋2-17-5        | 03-3699-5884 |                                                                                                   |                    | ○                  | 内科<br>呼吸器科<br>循環器科<br>アレルギー科                                 | 小林 健嗣            |                                              |
| 610 | 澤井クリニック              | 135-0061 | 東京都江東区豊洲5-2-10沢真ビル3F  | 03-5548-2629 | <a href="http://www.sawai-cl.com">http://www.sawai-cl.com</a>                                     | ○                  | ○                  | 内科<br>皮膚科                                                    | 澤井 まゆみ<br>澤井 真次郎 |                                              |
| 611 | 社会医療法人社団順江会江東病院      | 136-0072 | 東京都江東区大島              | 03-3685-2166 | <a href="http://www.koto-hospital.or.jp/index.html">http://www.koto-hospital.or.jp/index.html</a> |                    | ○                  | 全科                                                           | 各担当医             |                                              |
| 612 | 社会福祉法人あそか会あそか病院      | 135-0002 | 東京都江東区住吉1-18-1        | 03-3632-0290 | <a href="https://hp.asokakai.or.jp/">https://hp.asokakai.or.jp/</a>                               |                    | ○                  | 内科<br>耳鼻科                                                    | 田崎 俊之<br>古川 傑    |                                              |

電話や情報通信機器を用いて診療を実施する医療機関の一覧（東京都）

|     | 基本情報             |          |                                                     |              |                                                                                                                                                                         | 事務連絡に基づく対応について     |                    |                                  |                                                      |                                              |
|-----|------------------|----------|-----------------------------------------------------|--------------|-------------------------------------------------------------------------------------------------------------------------------------------------------------------------|--------------------|--------------------|----------------------------------|------------------------------------------------------|----------------------------------------------|
|     | 施設名              | 郵便番号     | 住所（都道府県から記載）                                        | 電話番号         | ウェブサイトURL                                                                                                                                                               | 初診の電話等を用いた診療の実施の有無 | 再診の電話等を用いた診療の実施の有無 | 対応診療科                            | 担当医師名                                                | 対面診療が必要と判断した場合に連携する医療機関名（複数ある場合は複数、住所も併せて記載） |
| 613 | 寿康会病院            | 136-0073 | 東京都江東区北砂2-1-22                                      | 03-3645-9151 | <a href="https://www.jukokai.or.jp/">https://www.jukokai.or.jp/</a>                                                                                                     |                    | ○                  | リハビリ・整形外科<br>小児科<br>消化器外科<br>その他 | 猪口 雄二<br>井野 威<br>宮本 新次郎<br>山崎 弘貴<br>石津 和洋<br>外来診療担当医 |                                              |
| 614 | しらかわ耳鼻咽喉科クリニック   | 135-0021 | 東京都江東区白河3-4-3-202                                   | 03-5245-3387 | <a href="https://www.shirakawa-ent.com/">https://www.shirakawa-ent.com/</a>                                                                                             |                    | ○                  | 耳鼻咽喉科                            | 姫野千恵美                                                | 順天堂大学附属順天堂医院（文京区本郷3-1-3）                     |
| 615 | 砂町銀座はた耳鼻咽喉科      | 136-0072 | 東京都江東区北砂5-7-2                                       | 03-5634-3387 | <a href="http://sunamachiginza-ent.com">http://sunamachiginza-ent.com</a>                                                                                               | ○                  | ○                  | 耳鼻咽喉科                            | 畠将晃                                                  |                                              |
| 616 | 清湘会記念病院          | 136-0071 | 東京都江東区亀戸2-17-24                                     | 03-3636-2301 | <a href="https://www.seishokai.or.jp/">https://www.seishokai.or.jp/</a>                                                                                                 |                    | ○                  | 内科                               | 氏家 一知                                                |                                              |
| 617 | たかすな内科・胃腸内科クリニック | 135-0062 | 東京都江東区東雲1-9-22                                      | 03-3536-3004 | <a href="http://www.takasuna-naika.com/?utm_source=hospita.jp&amp;utm_medium=referral">http://www.takasuna-naika.com/?utm_source=hospita.jp&amp;utm_medium=referral</a> |                    | ○                  | 内科<br>胃腸内科                       | 高砂 憲一                                                |                                              |
| 618 | たけうちこどもクリニック     | 135-0061 | 東京都江東区豊洲4-9-13-132                                  | 03-3533-2415 | <a href="http://www.takeuchi-kc.com">http://www.takeuchi-kc.com</a>                                                                                                     |                    | ○                  | 小児科                              | 竹内敏雄                                                 |                                              |
| 619 | タムスファミリークリニック豊洲  | 135-0061 | 東京都江東区豊洲2-2-1 アーバンドック ららぽーと豊洲3 4階（豊洲ベイサイドクロスタワーC棟内） | 03-3520-8813 | <a href="https://familyclinic-toyosu.tums.jp/">https://familyclinic-toyosu.tums.jp/</a>                                                                                 |                    | ○                  | 内科 小児科                           | 佐々木 隼人                                               |                                              |
| 620 | 東京有明医療大学附属クリニック  | 135-0063 | 東京都江東区有明2-9-1                                       | 03-6703-7003 |                                                                                                                                                                         |                    | ○                  | 内科<br>整形外科<br>外科                 | 林 洋<br>田中 滋城<br>川嶋 朗<br>鈴木 秀一<br>福林 徹<br>高橋 雅足       |                                              |
| 621 | 東京都立東部療育センター     | 136-0075 | 東京都江東区新砂3-3-25                                      | 03-5632-8070 | <a href="https://www.tobu-ryoiku.jp/">https://www.tobu-ryoiku.jp/</a>                                                                                                   |                    | ○                  | 小児科<br>神経小児科<br>神経内科             | 岩崎 裕治<br>外 常勤医師                                      |                                              |

電話や情報通信機器を用いて診療を実施する医療機関の一覧（東京都）

|     | 基本情報                       |          |                                    |              |                                                                                         | 事務連絡に基づく対応について     |                    |                     |        |                                                                                                                  |
|-----|----------------------------|----------|------------------------------------|--------------|-----------------------------------------------------------------------------------------|--------------------|--------------------|---------------------|--------|------------------------------------------------------------------------------------------------------------------|
|     | 施設名                        | 郵便番号     | 住所（都道府県から記載）                       | 電話番号         | ウェブサイトURL                                                                               | 初診の電話等を用いた診療の実施の有無 | 再診の電話等を用いた診療の実施の有無 | 対応診療科               | 担当医師名  | 対面診療が必要と判断した場合に連携する医療機関名（複数ある場合は複数、住所も併せて記載）                                                                     |
| 622 | 東陽町駅前クリニック                 | 135-0016 | 東京都江東区東陽3-27-17 長谷川ビル3階            | 03-5665-2381 | <a href="https://toyochow.towakai.com/">https://toyochow.towakai.com/</a>               |                    | ○                  | 内科                  | 中田 健一  |                                                                                                                  |
| 623 | 東陽町すばるクリニック                | 135-0016 | 東京都江東区東陽3-27-21 信栄実業本社ビル2階         | 03-5653-1587 | <a href="https://toyochow-subaru.towakai.com/">https://toyochow-subaru.towakai.com/</a> |                    | ○                  | 耳鼻咽喉科               | 三橋 正継  |                                                                                                                  |
| 624 | 豊洲小児科医院                    | 135-0061 | 東京都江東区豊洲5-6-29 1F                  | 03-3533-7733 | <a href="http://www.toyosu-shounika.com">http://www.toyosu-shounika.com</a>             | ○                  | ○                  | 小児科                 | 染谷 大槻  | 昭和大学江東豊洲病院（東京都江東区豊洲5-1-38）<br>順天堂大学医学部附属順天堂医院（東京都文京区本郷3-1-3）<br>東京臨海病院（東京都江戸川区臨海町1-4-2）<br>聖路加国際病院（東京都中央区明石町9-1） |
| 625 | とよす内科クリニック                 | 135-0061 | 東京都江東区豊洲4-2-2豊南堂ビル2階               | 03-5144-5155 | <a href="http://toyonai.jp/">http://toyonai.jp/</a>                                     | ○                  | ○                  | 内科・消化器内科・内視鏡内科・肝臓内科 | 金澤 信彦  |                                                                                                                  |
| 626 | 豊洲ペイシティブティッククリニック<br>耳鼻咽喉科 | 135-0061 | 東京都江東区豊洲2-2-1<br>豊洲ペイサイドクロスタワーC棟4階 | 03-3534-3387 | <a href="http://toyosu.sho-jin.com/">http://toyosu.sho-jin.com/</a>                     | ○                  | ○                  | 耳鼻科                 | 高野 真吾  |                                                                                                                  |
| 627 | 豊村医院耳鼻咽喉科                  | 136-0071 | 東京都江東区亀戸2-28-16                    | 03-5627-8555 | <a href="https://www.toyomurajibika.com/">https://www.toyomurajibika.com/</a>           |                    | ○                  | 耳鼻咽喉科               | 豊村 文将  |                                                                                                                  |
| 628 | 豊村医院耳鼻咽喉科音声・聴覚メディカルケア      | 136-0071 | 東京都江東区亀戸5-15-1 いなきやビル3階            | 03-5858-8604 | <a href="https://www.toyomurajibika.com/">https://www.toyomurajibika.com/</a>           |                    | ○                  | 耳鼻咽喉科               | 高瀬 聡一郎 |                                                                                                                  |
| 629 | なおやこどもクリニック                | 136-0074 | 東京都江東区東砂7-19-13ベルコモン南砂201          | 03-5653-0708 | <a href="https://www.naokodo.com/">https://www.naokodo.com/</a>                         | ○                  | ○                  | 小児科<br>アレルギー科       | 坂口直哉   |                                                                                                                  |
| 630 | 中澤医院                       | 136-0076 | 東京都江東区南砂7-4-4                      | 03-3644-7670 |                                                                                         |                    | ○                  | 内科<br>小児科<br>循環器内科  | 新保 悟朗  |                                                                                                                  |

電話や情報通信機器を用いて診療を実施する医療機関の一覧（東京都）

|     | 基本情報               |          |                               |              |                                                                                                 | 事務連絡に基づく対応について     |                    |                          |                                   |                                              |
|-----|--------------------|----------|-------------------------------|--------------|-------------------------------------------------------------------------------------------------|--------------------|--------------------|--------------------------|-----------------------------------|----------------------------------------------|
|     | 施設名                | 郵便番号     | 住所（都道府県から記載）                  | 電話番号         | ウェブサイトURL                                                                                       | 初診の電話等を用いた診療の実施の有無 | 再診の電話等を用いた診療の実施の有無 | 対応診療科                    | 担当医師名                             | 対面診療が必要と判断した場合に連携する医療機関名（複数ある場合は複数、住所も併せて記載） |
| 631 | びやじま内科医院           | 136-0072 | 東京都江東区大島5-36-7-2F             | 03-5628-0571 | <a href="http://www.clinic-ojima.com">http://www.clinic-ojima.com</a>                           | ○                  | ○                  | 内科<br>小児科<br>皮膚科<br>泌尿器科 | 鎌形 博展                             |                                              |
| 632 | 平和記念医院             | 135-0023 | 東京都江東区平野2-11-5 パシフィック第二門前仲町2F | 03-3820-8880 | <a href="https://heiwa-med.com">https://heiwa-med.com</a>                                       | ○                  | ○                  | 内科<br>皮膚科<br>漢方内科        | 劉 瑞芹                              | 江東病院（東京都江東区大島6-8-5）<br>あそか病院（東京都江東区住吉1-18-1） |
| 633 | 藤川内科・呼吸器内科クリニック    | 136-0072 | 東京都江東区大島4-6-21-西大島ビューハイツ101号室 | 03-5627-7700 | <a href="https://www.fujikawa-naika.com">https://www.fujikawa-naika.com</a>                     |                    | ○                  | 内科                       | 藤川 貴浩                             |                                              |
| 634 | MIZENクリニック豊洲       | 135-0061 | 東京都江東区豊洲3-2-20 豊洲フロント1階       | 03-6225-0230 | <a href="https://www.mizenclinic.jp/">https://www.mizenclinic.jp/</a>                           | ○                  | ○                  | 内科<br>心療内科<br>精神科        | 田澤 雄基<br>野原 弘義<br>竹林 駿太<br>久志本 公平 | 昭和大学高等豊洲病院（東京都江東区豊洲5丁目1-38）                  |
| 635 | 正井診療所              | 135-0012 | 東京都江東区海辺12-11                 | 03-3644-0943 | <a href="http://www.masai-s.com/">http://www.masai-s.com/</a>                                   | ○                  | ○                  | 内科                       | 正井 博文                             |                                              |
| 636 | みつはたペインクリニック       | 135-0016 | 東京都江東区東陽2-4-26 飯田ビル3F         | 03-5683-1199 | <a href="https://mituhata-pain.com/">https://mituhata-pain.com/</a>                             |                    | ○                  | ペインクリニック                 | 光畑 裕正                             | 順天堂大学医学部付属順天堂東京江東高齢者医療センター（東京都江東区新砂3-3-20）   |
| 637 | 南砂町駅前<br>おおさわクリニック | 136-0075 | 東京都江東区新砂3-3-53<br>アルカナル南砂2階E  | 03-6458-7498 | <a href="https://www.osawaclinic.net/">https://www.osawaclinic.net/</a>                         |                    | ○                  | 内科<br>胃腸肛門内科<br>外科       | 大澤 俊也                             |                                              |
| 638 | 南砂町おだやかクリニック       | 136-0075 | 東京都江東区新砂3-4-31 スナモ4F          | 03-5633-8751 | <a href="http://www.junreikai.com">http://www.junreikai.com</a>                                 | ○                  | ○                  | 内科<br>循環器内科<br>呼吸器科      | 西澤 寛人<br>井上 宏一<br>林 光恵            |                                              |
| 639 | メンタルオフィス亀戸         | 136-0071 | 東京都江東区亀戸6-58-11 亀戸ESビル3F      | 03-3636-2377 | <a href="http://www.kameido-mental.com/index.html">http://www.kameido-mental.com/index.html</a> |                    | ○                  | 精神科                      | 佐藤 光雅                             |                                              |

電話や情報通信機器を用いて診療を実施する医療機関の一覧（東京都）

|     | 基本情報              |           |                          |              |                                                                                 | 事務連絡に基づく対応について     |                    |                                              |                  |                                              |
|-----|-------------------|-----------|--------------------------|--------------|---------------------------------------------------------------------------------|--------------------|--------------------|----------------------------------------------|------------------|----------------------------------------------|
|     | 施設名               | 郵便番号      | 住所（都道府県から記載）             | 電話番号         | ウェブサイトURL                                                                       | 初診の電話等を用いた診療の実施の有無 | 再診の電話等を用いた診療の実施の有無 | 対応診療科                                        | 担当医師名            | 対面診療が必要と判断した場合に連携する医療機関名（複数ある場合は複数、住所も併せて記載） |
| 640 | 望月内科クリニック         | 135-0005  | 東京都江東区高橋13-2 ヴィラロイヤル森下1F | 03-5669-1531 | <a href="http://www.mochizukinaika.com">http://www.mochizukinaika.com</a>       | ○                  | ○                  | 内科<br>呼吸器科<br>循環器科<br>アレルギー科                 | 望月 俊男            |                                              |
| 641 | 森井整形外科            | 135-0013  | 東京都江東区千田13-13            | 03-3649-7000 | <a href="https://morii-orth.jp/">https://morii-orth.jp/</a>                     |                    | ○                  | 整形外科                                         | 森井 太郎            |                                              |
| 642 | 森崎医院              | 135-0016  | 東京都江東区東陽4-10-2-1F        | 03-3645-1493 | <a href="https://morisaki-iin.com/">https://morisaki-iin.com/</a>               |                    | ○                  | 内科                                           | 佐々木 佑            |                                              |
| 643 | 森下駅前クリニック         | 135-00004 | 東京都江東区森下1-16-7 太田ビル1階    | 03-6666-9335 | <a href="https://www.morishitaekimae.com/">https://www.morishitaekimae.com/</a> |                    | ○                  | 内科<br>呼吸器内科<br>小児科                           | 篠塚 成順<br>神坂 京子   |                                              |
| 644 | もんなか整形外科          | 135-0044  | 東京都江東区越中島2-14-10         | 03-3630-3001 | <a href="https://monnaka.jp/">https://monnaka.jp/</a>                           | ○                  | ○                  | 整形外科                                         | 佐藤 芳貞            |                                              |
| 645 | 柳沢ファミリークリニック      | 136-0073  | 東京都江東区北砂5-14-3-101       | 03-6458-7818 | <a href="https://www.yanagisawafc.com">https://www.yanagisawafc.com</a>         | ○                  | ○                  | 内科<br>小児科<br>皮膚科                             | 柳澤 明子            |                                              |
| 646 | 六地藏クリニック          | 136-0076  | 東京都江東区南砂2-28-7           | 03-5690-7651 | <a href="http://www.rokujizou-clinic.jp">http://www.rokujizou-clinic.jp</a>     |                    | ○                  | 脳神経外科<br>整形外科<br>神経内科<br>循環器内科<br>リハビリテーション科 | 小倉 弘章            |                                              |
| 647 | 医療法人社団同友会 深川クリニック | 135-0022  | 東京都江東区三好2-15-10          | 03-3630-0003 | <a href="http://www.do-yukai.com">http://www.do-yukai.com</a>                   |                    | ○                  | 内科                                           | 高谷 純司<br>他当日の担当医 |                                              |
| 648 | YSこころのクリニック       | 135-0033  | 東京都江東区深川1-5-5 佐藤康行真我ビル6階 | 03-6458-8804 | <a href="https://shingaclinic.com/">https://shingaclinic.com/</a>               | ○                  | ○                  | 精神科                                          | 宮島 賢也            |                                              |



電話や情報通信機器を用いて診療を実施する医療機関の一覧（東京都）

|     | 基本情報               |          |                                |              |                                                                                             | 事務連絡に基づく対応について     |                    |                  |                                                                      |                                              |
|-----|--------------------|----------|--------------------------------|--------------|---------------------------------------------------------------------------------------------|--------------------|--------------------|------------------|----------------------------------------------------------------------|----------------------------------------------|
|     | 施設名                | 郵便番号     | 住所（都道府県から記載）                   | 電話番号         | ウェブサイトURL                                                                                   | 初診の電話等を用いた診療の実施の有無 | 再診の電話等を用いた診療の実施の有無 | 対応診療科            | 担当医師名                                                                | 対面診療が必要と判断した場合に連携する医療機関名（複数ある場合は複数、住所も併せて記載） |
| 649 | 豊洲パークシティ皮膚科        | 135-0061 | 東京都江東区豊洲2-5-3-102E             | 03-5547-1221 | <a href="https://www.toyosu-hifuka.com/">https://www.toyosu-hifuka.com/</a>                 |                    | ○                  | 皮膚科              | 萩原 正則                                                                | 豊洲パークシティ皮膚科                                  |
| 650 | あおよこ皮膚科クリニック       | 140-0004 | 東京都品川区南品川2-17-24フルカワビル2階       | 03-5479-6051 | <a href="http://www.aoyoko-sc.jp/">http://www.aoyoko-sc.jp/</a>                             |                    | ○                  | 皮膚科              | 田嶋 徹                                                                 |                                              |
| 651 | 阿部病院               | 141-0022 | 東京都品川区東五反田1-6-8                | 03-3447-4777 |                                                                                             | ○                  | ○                  | 内科<br>小児科        | 木島澄子                                                                 |                                              |
| 652 | いすゞ病院              | 140-0013 | 東京都品川区南大井6-21-10               | 03-3762-9127 | <a href="http://isuzu-hospital.jp/">http://isuzu-hospital.jp/</a>                           |                    | ○                  | 内科<br>整形外科<br>眼科 | 芦原毅<br>木村一博<br>保坂美生<br>堀静<br>藤井英<br>姫野良<br>森山沙帆                      |                                              |
| 653 | 稲波脊椎・関節病院          | 140-0002 | 東京都品川区東品川3-17-5                | 03-3450-1773 | <a href="https://www.iwai.com/inanami-sekitsui/">https://www.iwai.com/inanami-sekitsui/</a> | ○                  | ○                  | 整形外科             | 稲波 弘彦<br>高野 裕一<br>内山 英司<br>湯澤 洋平<br>金子 剛士<br>瀬川 知秀<br>柳澤 和芳<br>小口 史彦 |                                              |
| 654 | 医療法人社団小川医院         | 142-0053 | 東京都品川区中延6-9-18                 | 337817806    | <a href="https://www.nakanobu-ogawaiinn.com/">https://www.nakanobu-ogawaiinn.com/</a>       | ○                  | ○                  | 内科小児科リウマチ科       | 小川仁史                                                                 |                                              |
| 655 | 医療法人社団かなめ会田口クリニック  | 141-0031 | 東京都品川区西五反田1-25-5               | 03-6417-4155 | <a href="https://taguchi-clinic.jp/">https://taguchi-clinic.jp/</a>                         |                    | ○                  | 内科               | 田口 和三                                                                |                                              |
| 656 | 医療法人社団恵芳会松脇クリニック品川 | 141-0001 | 東京都品川区北品川6-7-29ガーデンシティー品川御殿山1階 | 03-6721-6870 | <a href="https://matsuwaki.com">https://matsuwaki.com</a>                                   |                    | ○                  | 耳鼻咽喉科<br>呼吸器内科   | 松脇由典<br>中島庸也<br>柳清<br>満山知恵子<br>足立哲也<br>中込一之<br>皆川俊介<br>渡邊直昭          |                                              |
| 657 | 医療法人社団孝徳会孝仁クリニック   | 140-0011 | 東京都品川区東大井5-14-11-1F            | 03-3474-5566 | <a href="https://koujin.or.jp">https://koujin.or.jp</a>                                     |                    | ○                  | 内科（予約による訪問診療）    | 高久 仁利                                                                |                                              |

電話や情報通信機器を用いて診療を実施する医療機関の一覧（東京都）

|     | 基本情報                              |          |                                         |              |                                                                                                         | 事務連絡に基づく対応について     |                    |                            |                |                                                                                             |
|-----|-----------------------------------|----------|-----------------------------------------|--------------|---------------------------------------------------------------------------------------------------------|--------------------|--------------------|----------------------------|----------------|---------------------------------------------------------------------------------------------|
|     | 施設名                               | 郵便番号     | 住所（都道府県から記載）                            | 電話番号         | ウェブサイトURL                                                                                               | 初診の電話等を用いた診療の実施の有無 | 再診の電話等を用いた診療の実施の有無 | 対応診療科                      | 担当医師名          | 対面診療が必要と判断した場合に連携する医療機関名（複数ある場合は複数、住所も併せて記載）                                                |
| 658 | 医療法人社団CVIC<br>大井町心臓クリニック          | 140-0011 | 東京都品川区東大井5-2-3<br>かんべ土地K-15ビル（おおい元気館）3階 | 03-6712-9085 | <a href="https://oimachiclinic.com/">https://oimachiclinic.com/</a>                                     |                    | ○                  | 循環器内科<br>内科                | 寺島 正浩<br>伊藤 順子 |                                                                                             |
| 659 | 医療法人社団浄真会<br>仲田クリニック              | 142-0052 | 東京都品川区東中延2-9-7                          | 03-5749-5117 | <a href="http://www.nakada-cl.jp">http://www.nakada-cl.jp</a>                                           |                    | ○                  | 内科<br>泌尿器科<br>皮膚科          | 仲田浄治郎 仲<br>田佳子 | 東京品川病院（東京都品川区）                                                                              |
| 660 | 医療法人社団千秋双葉会<br>東京アーバンクリニック<br>五反田 | 141-0022 | 東京都品川区東五反田5-27-3 第二野村ビル5F               | 03-3441-6755 | <a href="http://www.tokyourbanclinic-gotanda.com/">http://www.tokyourbanclinic-gotanda.com/</a>         | ○                  | ○                  | 小児科<br>アレルギー科<br>内科<br>皮膚科 | 野村 さや香         | 都立広尾病院（東京都渋谷区）<br>NTT関東病院（東京都品川区）<br>昭和大学病院（東京都品川区）<br>愛育病院（東京都港区）<br>日本赤十字医療センター（東京都渋谷区）など |
| 661 | 医療法人社団ナイズ<br>キャプスクリニック東<br>品川     | 140-0002 | 東京都品川区東品川4丁目5番22号 オアーズ<br>品川レジデンス1階     | 03-4579-9249 | <a href="https://www.caps-clinic.jp/higashi-shinagawa">https://www.caps-clinic.jp/higashi-shinagawa</a> | ○                  | ○                  | 小児科                        | 藤井 泰志          | 東京品川病院（東京都品川区東大井6丁目3-22）<br>東京都立広尾病院（東京都渋谷区恵比寿2-34-10）<br>昭和大学病院（東京都品川区旗の台1丁目5-8）           |
| 662 | 医療法人社団 はしだ眼科<br>クリニック             | 141-0021 | 東京都品川区上大崎2-16-9アトレ目黒1-4階                | 03-5791-5430 | <a href="https://www.hashidaeyeclinic.com/">https://www.hashidaeyeclinic.com/</a>                       | ○                  | ○                  | 眼科                         | 橋田 節子          | NTT東日本関東病院（東京都品川区）<br>井上眼科病院（東京都千代田区）                                                       |
| 663 | 医療法人社団柘会島津山<br>眼科                 | 141-0022 | 東京都品川区東五反田1-5-3                         | 03-5798-2740 | <a href="http://www.shimazuyama-eye.jp/">http://www.shimazuyama-eye.jp/</a>                             |                    | ○                  | 眼科                         | 酒井達朗           |                                                                                             |
| 664 | 医療法人社団朋英会 館<br>医院                 | 142-0062 | 東京都品川区小山2-12-10                         | 03-3782-8088 | <a href="https://www.tachi-iin.com/556.html">https://www.tachi-iin.com/556.html</a>                     |                    | ○                  | 内科泌尿器科                     | 館 英実           |                                                                                             |
| 665 | 医療法人社団 まつばら<br>クリニック              | 142-0051 | 東京都品川区平塚3-3-13                          | 03-5751-8501 | <a href="http://まつばらクリニック.com/">http://まつばらクリニック.com/</a>                                               |                    | ○                  | 内科小児科                      | 松原豊子           |                                                                                             |
| 666 | 医療法人社団明方会 松<br>本クリニック             | 142-0053 | 東京都品川区中延4-5-10オーク中延1F                   | 03-3784-9100 | <a href="https://www.matsumotoclinic-nakanobu.com/">https://www.matsumotoclinic-nakanobu.com/</a>       | ○                  | ○                  | 内科                         | 松本明石、松本<br>真弓、 |                                                                                             |

電話や情報通信機器を用いて診療を実施する医療機関の一覧（東京都）

|     | 基本情報                  |          |                                   |              |                                                                                   | 事務連絡に基づく対応について     |                    |                        |                                                   |                                              |
|-----|-----------------------|----------|-----------------------------------|--------------|-----------------------------------------------------------------------------------|--------------------|--------------------|------------------------|---------------------------------------------------|----------------------------------------------|
|     | 施設名                   | 郵便番号     | 住所（都道府県から記載）                      | 電話番号         | ウェブサイトURL                                                                         | 初診の電話等を用いた診療の実施の有無 | 再診の電話等を用いた診療の実施の有無 | 対応診療科                  | 担当医師名                                             | 対面診療が必要と判断した場合に連携する医療機関名（複数ある場合は複数、住所も併せて記載） |
| 667 | 医療法人社団めぐみ会めぐみクリニック目黒  | 141-0021 | 東京都品川区上大崎2-12-2 ミズホビル2階           | 03-5422-9877 | <a href="https://www.megumicl.com/">https://www.megumicl.com/</a>                 | ○                  | ○                  | 内科                     | 小野 直美<br>加藤 正典<br>菊池 俊介<br>須藤 英訓<br>税所 俊光<br>田村 豊 |                                              |
| 668 | 医療法人社団豊佳会青柳医院         | 142-0042 | 東京都品川区豊町1-4-15第一青柳ビル              | 03-3788-0801 |                                                                                   |                    | ○                  | 内科<br>外科               | 青柳 豊                                              |                                              |
| 669 | 医療法人社団格会大崎眼科クリニック     | 141-0032 | 東京都品川区大崎1-6-4新大崎勸業ビル2階            | 03-5436-4155 | <a href="http://www.ohsaki-eye.jp/">http://www.ohsaki-eye.jp/</a>                 |                    | ○                  | 眼科                     | 清水 えりか<br>武田 義玄                                   |                                              |
| 670 | 医療法人社団癒合会 医道五十三次クリニック | 140-0001 | 東京都品川区北品川1-22-17 ニックハイム北品川109     | 03-6433-3170 | <a href="https://www.takanawa-clinic.com/">https://www.takanawa-clinic.com/</a>   | ○                  | ○                  | 内科                     | 陰山 康成<br>長岡 美妃                                    |                                              |
| 671 | NTT東日本関東病院            | 141-8625 | 東京都品川区東五反田5-9-22                  | 03-3448-6111 | <a href="https://www.nmct.ntt-east.co.jp/">https://www.nmct.ntt-east.co.jp/</a>   |                    | ○                  | 小児科<br>産婦人科以外の<br>全診療科 | 外来予定表に<br>準じる                                     |                                              |
| 672 | えばらサンクリニック            | 142-0053 | 東京都品川区中延2-9-22-1F                 | 03-3786-0012 | <a href="http://ebara-sun-cl.net/">http://ebara-sun-cl.net/</a>                   |                    | ○                  | 内科<br>小児科<br>皮膚科       | 北川 浩史                                             | 昭和大学病院、NTT東日本関東病院、東京品川病院、荏原病院、など             |
| 673 | 大井町耳鼻咽喉科              | 140-0011 | 東京都品川区東大井6-1-5桐木ハイツ202            | 03-6423-1433 | <a href="http://oimachi-jibika.com/">http://oimachi-jibika.com/</a>               | ○                  | ○                  | 耳鼻咽喉科                  | 牧野 奈緒                                             |                                              |
| 674 | 大井町とうまクリニック           | 140-0014 | 東京都品川大井1-16-2プリリア大井町ラヴィアンタワー2     | 03-5718-4080 | <a href="http://www.oimachi-toma-clin.com">http://www.oimachi-toma-clin.com</a>   | ○                  | ○                  | 内科<br>循環器科<br>呼吸器科     | 當間 弘子                                             |                                              |
| 675 | 大井町なかじま眼科・内科          | 140-0014 | 東京都品川区大井2-1-1<br>大井2丁目メディカルセンター1階 | 03-3785-1255 | <a href="https://nakajima-ganka-naika.com/">https://nakajima-ganka-naika.com/</a> | ○                  | ○                  | 眼科<br>内科               | 中島 剛<br>中島 資子                                     |                                              |

電話や情報通信機器を用いて診療を実施する医療機関の一覧（東京都）

|     | 基本情報                |          |                                   |              |                                                                                                                                                                  | 事務連絡に基づく対応について     |                    |                                   |                                 |                                                            |
|-----|---------------------|----------|-----------------------------------|--------------|------------------------------------------------------------------------------------------------------------------------------------------------------------------|--------------------|--------------------|-----------------------------------|---------------------------------|------------------------------------------------------------|
|     | 施設名                 | 郵便番号     | 住所（都道府県から記載）                      | 電話番号         | ウェブサイトURL                                                                                                                                                        | 初診の電話等を用いた診療の実施の有無 | 再診の電話等を用いた診療の実施の有無 | 対応診療科                             | 担当医師名                           | 対面診療が必要と判断した場合に連携する医療機関名（複数ある場合は複数、住所も併せて記載）               |
| 676 | 大崎こどもハート・アレルギークリニック | 141-0001 | 東京都品川区北品川5-8-15北品川ホーム 1F          | 03-3440-8211 | <a href="https://kodomo-heart.com/osaki/">https://kodomo-heart.com/osaki/</a>                                                                                    | ○                  | ○                  | 小児科<br>アレルギー科                     | 加藤 はるか                          | 昭和大学病院（東京都品川区旗の台1-5-8）                                     |
| 677 | 大崎耳鼻咽喉科             | 141-6003 | 東京都品川区大崎2-1-1 Think Park Tower 3F | 03-5745-0733 | <a href="https://www.osaki-jibika.net">https://www.osaki-jibika.net</a>                                                                                          |                    | ○                  | 耳鼻咽喉科                             | 八島隆敏<br>加藤智史<br>本田圭司<br>倉田奈都子   |                                                            |
| 678 | 大森耳鼻咽喉科             | 140-0013 | 東京都品川区南大井6-28-12ヒューリック大森ビル5F      | 03-6410-8633 | <a href="http://www.omori-jibika.net">http://www.omori-jibika.net</a>                                                                                            |                    | ○                  | 耳鼻咽喉科<br>アレルギー科                   | 八島隆敏<br>高橋正時                    |                                                            |
| 679 | 小澤医院                | 140-0011 | 東京都品川区東大井3-1-18                   | 03-3298-0088 | <a href="https://oimachi-ozawaclinic.com">https://oimachi-ozawaclinic.com</a>                                                                                    | ○                  | ○                  | 小児科<br>内科                         | 小澤 安文                           | 東京品川病院（東京都品川区東大井6-3-22）<br>東邦大学医療センター大森病院（東京都大田区大森西6-11-1） |
| 680 | 小野内科                | 142-0063 | 東京都品川区荏原5-16-19                   | 03-3781-9580 | <a href="http://www.ononaika.net">http://www.ononaika.net</a>                                                                                                    | ○                  | ○                  | 内科<br>小児科                         | 小野竜                             |                                                            |
| 681 | 柿島医院                | 140-0014 | 東京都品川区大井3-21-10                   | 03-3775-5171 | <a href="http://www.taikou.or.jp">http://www.taikou.or.jp</a>                                                                                                    |                    | ○                  | 内科<br>循環器内科<br>ペインクリニック<br>内科     | 堀之内八千代<br>堀之内仁美<br>増田尚己<br>中野将孝 |                                                            |
| 682 | かきのき眼科              | 142-0062 | 東京都品川区小山6-3-9ウエストヴィレッジビルディング4F    | 03-6426-4639 | <a href="http://kakinokiganka.jp/">http://kakinokiganka.jp/</a>                                                                                                  | ○                  | ○                  | 眼科                                | 柿木一邦<br>伊藤由紀子                   |                                                            |
| 683 | KARADA(からだ)内科クリニック  | 141-0031 | 東京都品川区西五反田1-2-8 FUNDES五反田10F      | 03-3495-0192 | ①内科ホームページ<br><a href="https://karada-naika.com/">https://karada-naika.com/</a><br>②性感染症（性病）ホームページ<br><a href="https://sti-check.com/">https://sti-check.com/</a> | ○                  | ○                  | 総合内科<br>感染症内科<br>性感染症（性病）<br>渡航外来 | 佐藤 昭裕                           | NTT東関東病院（東京都品川区東五反田5-9-22）<br>東京医科大学病院（東京都新宿区西新宿6-7-1）     |
| 684 | 眼科西大井クリニック          | 140-0015 | 東京都品川区西大井1-9-6                    | 03-5746-0746 | <a href="https://nishiooi.com/01clnc.htm">https://nishiooi.com/01clnc.htm</a>                                                                                    | ○                  | ○                  | 眼科                                | 徳永 美佳                           |                                                            |

電話や情報通信機器を用いて診療を実施する医療機関の一覧（東京都）

|     | 基本情報              |          |                               |              |                                                                             | 事務連絡に基づく対応について     |                    |                     |       |                                              |
|-----|-------------------|----------|-------------------------------|--------------|-----------------------------------------------------------------------------|--------------------|--------------------|---------------------|-------|----------------------------------------------|
|     | 施設名               | 郵便番号     | 住所（都道府県から記載）                  | 電話番号         | ウェブサイトURL                                                                   | 初診の電話等を用いた診療の実施の有無 | 再診の電話等を用いた診療の実施の有無 | 対応診療科               | 担当医師名 | 対面診療が必要と判断した場合に連携する医療機関名（複数ある場合は複数、住所も併せて記載） |
| 685 | きくち眼科             | 142-0053 | 東京都品川区中延4-4-8                 | 03-3781-4306 | <a href="http://www.kikuchinakanobu.com">http://www.kikuchinakanobu.com</a> |                    | ○                  | 眼科                  | 渡部 通史 |                                              |
| 686 | 銀座よしえクリニック品川院     | 141-0031 | 東京都品川区西五反田4-31-17 MYビル2F      | 0120-398-885 | <a href="https://www.ginzabiyou.com/">https://www.ginzabiyou.com/</a>       | ○                  | ○                  | 皮膚科<br>美容皮膚科        | 担当医   |                                              |
| 687 | けいひんファミリークリニック    | 140-0011 | 東京都品川区東大井2-12-19 MKビル3階       | 03-5767-7755 | <a href="https://www.med-kfc.com/">https://www.med-kfc.com/</a>             | ○                  | ○                  | 小児科<br>内科<br>アレルギー科 | 松本 道祐 |                                              |
| 688 | 五反田なると耳鼻咽喉科       | 1410022  | 東京都品川区東五反田5-28-10第2花谷ビル7階     | 364325644    | <a href="https://naruto-orl.com">https://naruto-orl.com</a>                 |                    | ○                  | 耳鼻咽喉科               | 鳴戸理佐  |                                              |
| 689 | 五反田泌尿器科内科 すぐクリニック | 141-0022 | 東京都品川区東五反田4-11-6クレスト五反田ビル2階B号 | 03-6432-5785 | <a href="http://www.gotanda-minna.com/">http://www.gotanda-minna.com/</a>   |                    | ○                  | 泌尿器科<br>内科          | 首藤直樹  | NTT東日本関東病院（東京都品川区東五反田5-9-22）                 |
| 690 | 御殿山整形外科リハビリクリニック  | 141-0001 | 東京都品川区北品川5-4-1 大崎ブライトプラザ2F    | 03-3446-5108 | <a href="http://www.gotenyama-seikei.jp">http://www.gotenyama-seikei.jp</a> |                    | ○                  | 整形外科<br>リハビリテーション科  | 森末 光  |                                              |
| 691 | こどもの森クリニック        | 141-0021 | 東京都品川区上大崎3-3-1 自転車総合ビル1階      | 03-5798-4141 | <a href="http://kodomonomori-clinic.com">http://kodomonomori-clinic.com</a> |                    | ○                  | 小児科                 | 早崎理香  |                                              |
| 692 | こみね循環器科・内科クリニック   | 142-0053 | 東京都品川区中延5-13-16 1階            | 03-5750-6355 | <a href="http://komine-cl.com">http://komine-cl.com</a>                     |                    | ○                  | 内科                  | 小峰 武明 |                                              |
| 693 | 小山中央診療所           | 142-0062 | 東京都品川区小山3-1-10                | 03-3712-3415 | <a href="http://www.koyachuo-cl.com">http://www.koyachuo-cl.com</a>         | ○                  | ○                  | 内科<br>消化器内科         | 笹川 綾子 |                                              |

電話や情報通信機器を用いて診療を実施する医療機関の一覧（東京都）

|     | 基本情報                |          |                           |              |                                     | 事務連絡に基づく対応について     |                           |                                                             |                                                             |                                                                                                                                                                                                                                  |
|-----|---------------------|----------|---------------------------|--------------|-------------------------------------|--------------------|---------------------------|-------------------------------------------------------------|-------------------------------------------------------------|----------------------------------------------------------------------------------------------------------------------------------------------------------------------------------------------------------------------------------|
|     | 施設名                 | 郵便番号     | 住所（都道府県から記載）              | 電話番号         | ウェブサイトURL                           | 初診の電話等を用いた診療の実施の有無 | 再診の電話等を用いた診療の実施の有無        | 対応診療科                                                       | 担当医師名                                                       | 対面診療が必要と判断した場合に連携する医療機関名（複数ある場合は複数、住所も併せて記載）                                                                                                                                                                                     |
| 694 | さえきクリニック            | 142-0041 | 東京都品川区戸越6-4-3             | 03-5749-5821 | http://saekiclinic.byoinnavi.jp/pc/ | ○                  | ○                         | 内科<br>小児科                                                   | 佐伯明子                                                        |                                                                                                                                                                                                                                  |
| 695 | サンタハウスこどもクリニック      | 142-0062 | 東京都品川区小山3-1-2 1階          | 03-3719-5533 | http://www.santahousecodomo.jp/     | ○                  | ○                         | 小児科<br>アレルギー科<br>内科                                         | 山田勝敏                                                        | 昭和大学病院（東京都品川区旗の台1-5-8）<br>荏原病院（東京都大田区東雪谷4-5-10）<br>都立広尾病院（東京都渋谷区恵比寿2-34-10）<br>日本赤十字社医療センター（東京都渋谷区広尾4-1-22）<br>NTT東日本関東病院（東京都品川区東五反田5-9-22）<br>東京品川病院（東京都品川区東大井6-3-22）<br>東邦大学大森病院（東京都大田区大森西6-11-1）<br>東邦大学大橋病院（東京都目黒区大橋2-22-36） |
| 696 | しばざき泌尿器クリニック        | 142-0062 | 東京都品川区小山6-4-14            | 03-5749-1233 | http://www.shibazaki-clinic.jp/     |                    | ○                         | 泌尿器科<br>腎臓内科                                                | 柴崎 裕                                                        |                                                                                                                                                                                                                                  |
| 697 | Jメンタル五反田駅前クリニック     | 141-0031 | 東京都品川区西五反田2-5-2五反田東幸ビル7F  | 03-3491-7776 | http://www.j-mental.com/            | ○                  | ○                         | 精神科<br>心療内科<br>漢方内科                                         | 小林城治<br>その他                                                 | 荏原病院（東京都大田区東雪谷四丁目5-10）<br>晴和病院（東京都新宿区弁天町91）<br>東京都立松沢病院（東京都世田谷区上北沢2-1-1）                                                                                                                                                         |
| 698 | 城南こどもハート・アレルギークリニック | 140-0004 | 東京都品川区南品川2-17-27三井南品川ビル1階 | 03-3474-8010 | https://kodomo-heart.com/jonan/     | ○                  | ○                         | 小児科<br>アレルギー科                                               | 田村 恵子                                                       | 昭和大学病院（東京都品川区旗の台1-5-8）                                                                                                                                                                                                           |
| 699 | 昭和大学病院附属東病院         | 142-0054 | 東京都品川区西中延2-14-19          | 03-3784-8000 | http://www.showa-u.ac.jp/SUHE/      |                    | ○<br>外来予約済の患者さん<br>のみ対応可能 | 糖尿病代謝内分<br>泌内科<br>脳神経内科<br>精神神経科<br>麻酔科<br>ペインクリニック<br>整形外科 | 山岸 昌一<br>小野 賢二郎<br>岩波 明<br>大江 克憲<br>稲垣 克記<br>恩田 秀寿<br>安達 太郎 |                                                                                                                                                                                                                                  |
| 700 | 瀬底皮膚科クリニック          | 140-0011 | 東京都品川区旗の台5-7-6-108        | 03-3787-0115 | https://www.sesoko-hifuka.com       |                    | ○                         | 皮膚科                                                         | 三嶋 絵美                                                       |                                                                                                                                                                                                                                  |
| 701 | 竹内胃腸内科医院            | 141-0022 | 東京都品川区東五反田5-27-3第2野村ビル3階  | 03-5421-7149 | https://takeuchi-giclinic.com       | ○                  | ○                         | 内科<br>消化器内科<br>胃腸内科                                         | 竹内義明                                                        | NTT東日本関東病院（東京都品川区）<br>昭和大学病院（東京都品川区）<br>東京都品川病院（東京都品川区）                                                                                                                                                                          |
| 702 | たごファミリークリニック        | 142-0051 | 東京都品川区平塚2-15-15 丸ニビル 3階   | 03-3785-5250 | http://tago-clinic.in.coocan.jp/    |                    | ○                         | 内科<br>小児科                                                   | 田胡秀和                                                        |                                                                                                                                                                                                                                  |

電話や情報通信機器を用いて診療を実施する医療機関の一覧（東京都）

|     | 基本情報          |          |                                     |              |                                                                                             | 事務連絡に基づく対応について     |                    |                     |        |                                                                                                           |
|-----|---------------|----------|-------------------------------------|--------------|---------------------------------------------------------------------------------------------|--------------------|--------------------|---------------------|--------|-----------------------------------------------------------------------------------------------------------|
|     | 施設名           | 郵便番号     | 住所（都道府県から記載）                        | 電話番号         | ウェブサイトURL                                                                                   | 初診の電話等を用いた診療の実施の有無 | 再診の電話等を用いた診療の実施の有無 | 対応診療科               | 担当医師名  | 対面診療が必要と判断した場合に連携する医療機関名（複数ある場合は複数、住所も併せて記載）                                                              |
| 703 | とごし公園内科クリニック  | 142-0041 | 東京都品川区戸越5-11-8新川屋ビル1F               | 03-3784-2112 | <a href="https://togoshipark-cl.com/">https://togoshipark-cl.com/</a>                       | ○                  | ○                  | 内科全般                | 富田 英利  |                                                                                                           |
| 704 | 戸越泌尿器科内科クリニック | 142-0042 | 東京都品川区豊町1-3-17山崎ビル1階                | 03-5788-6120 | <a href="http://togoshi-clinic.com/">http://togoshi-clinic.com/</a>                         | ○                  | ○                  | 泌尿器科<br>内科          | 丸山 修   |                                                                                                           |
| 705 | 中村医院          | 142-0053 | 東京都品川区中延6-4-17                      | 03-3764-0128 | <a href="http://www.n-cl.jp">http://www.n-cl.jp</a>                                         | ○                  | ○                  | 内科 整形 皮膚科           | 中村 秀紀  | 東邦大学医療センター大森病院（東京都大田区大森西6-11-1）                                                                           |
| 706 | なるき内科クリニック    | 142-0043 | 東京都品川区二葉3-26-6-101                  | 03-5702-2255 | <a href="https://naruki-naika.com/">https://naruki-naika.com/</a>                           | ○                  | ○                  | 内科                  | 成木 良瑛子 |                                                                                                           |
| 707 | 西川医院          | 142-0064 | 東京都品川区旗の台4-1-5                      | 03-3781-7825 | <a href="http://hwm8.spaaqs.ne.jp/nishikawaiin/">http://hwm8.spaaqs.ne.jp/nishikawaiin/</a> |                    | ○                  | 内科<br>消化器内科<br>小児科  | 西川順一   |                                                                                                           |
| 708 | 野本内科クリニック     | 142-0062 | 東京都品川区小山6-3-9-3階                    | 03-5749-3300 | <a href="http://www.nomotonaika.jp">http://www.nomotonaika.jp</a>                           |                    | ○                  | 内科                  | 野本日出男  | 荏原病院（東京都大田区東雪谷4-5-10）<br>NTT東日本関東病院（東京都品川区東五反田5-9-22）<br>昭和大学病院（東京都品川区旗の台1-5-8）<br>東京共済病院（東京都目黒区中目黒2-3-8） |
| 709 | 旗の台駅東口 いわた眼科  | 142-0054 | 東京都品川区西中延2-15-21<br>T&Y YASUDAビル 1F | 03-6426-6155 | <a href="https://www.iwata.com/">https://www.iwata.com/</a>                                 | ○                  | ○                  | 眼科                  | 岩田 文乃  |                                                                                                           |
| 710 | ハピコワクリニック五反田  | 141-0022 | 東京都品川区東五反田1-22-6五反田さくらビル5F          | 03-3444-8158 | <a href="https://hopicowa-clinic.jp/">https://hopicowa-clinic.jp/</a>                       | ○                  | ○                  | 呼吸器内科・アレルギー科・内科・小児科 | 岸本 久美子 | 自院もしくは東京品川病院（東京都品川区東大井6-3-22）                                                                             |
| 711 | はるクリニック西小山    | 142-0062 | 東京都品川区小山6-1-1                       | 03-5794-8630 | <a href="http://haru-clinic.jp">haru-clinic.jp</a>                                          | ○                  | ○                  | 内科                  | 飛川浩治   | 東京品川病院・NTT東日本関東病・院昭和大学病院                                                                                  |

電話や情報通信機器を用いて診療を実施する医療機関の一覧（東京都）

|     | 基本情報           |          |                                   |              |                                                                                         | 事務連絡に基づく対応について     |                    |                    |       |                                                                           |
|-----|----------------|----------|-----------------------------------|--------------|-----------------------------------------------------------------------------------------|--------------------|--------------------|--------------------|-------|---------------------------------------------------------------------------|
|     | 施設名            | 郵便番号     | 住所（都道府県から記載）                      | 電話番号         | ウェブサイトURL                                                                               | 初診の電話等を用いた診療の実施の有無 | 再診の電話等を用いた診療の実施の有無 | 対応診療科              | 担当医師名 | 対面診療が必要と判断した場合に連携する医療機関名（複数ある場合は複数、住所も併せて記載）                              |
| 712 | 東品川クリニック       | 142-0002 | 東京都品川区東品川3-18-3 神興ビル3階            | 03-3472-6684 | <a href="https://www.hs.-clinic.com">https://www.hs.-clinic.com</a>                     | ○                  | ○                  | 内科<br>小児科<br>総合診療科 | 平塚祐介  |                                                                           |
| 713 | 二葉医院           | 142-0043 | 東京都品川区二葉1-7-9                     | 03-3782-2748 |                                                                                         |                    | ○                  | 内科<br>麻酔科          | 羽尻裕美  |                                                                           |
| 714 | 穂坂クリニック        | 142-0062 | 東京都品川区小山3-24-6                    | 03-3781-1351 | <a href="https://hosaka-clinic.com">https://hosaka-clinic.com</a>                       | ○                  | ○                  | 内科リウマチ科<br>アレルギー科  | 穂坂 茂  |                                                                           |
| 715 | 三浦医院           | 146-0031 | 東京都品川区西五反田5-10-6-104              | 03-3492-5225 | <a href="https://miurain.jp/">https://miurain.jp/</a>                                   | ○                  | ○                  | 内科<br>外科           | 三浦 和裕 |                                                                           |
| 716 | みしま内科          | 142-0064 | 東京都品川区旗の台5-8-5                    | 03-6426-7728 | <a href="http://mishima-naika.com">http://mishima-naika.com</a>                         |                    | ○                  | 内科                 | 三嶋晃   |                                                                           |
| 717 | 武蔵小山胃腸内視鏡クリニック | 142-0062 | 東京都品川区小山4-13-13                   | 0120-949-922 | <a href="http://www.msk-cl.com">http://www.msk-cl.com</a>                               | ○                  | ○                  | 内科                 | 土井 健一 |                                                                           |
| 718 | むさしこやま眼科       | 142-0062 | 東京都品川区小山3-15-1パークシティ武蔵小山ザモール2階2-H | 03-3788-4639 | <a href="https://www.musashikoyamaganka.jp/">https://www.musashikoyamaganka.jp/</a>     | ○                  | ○                  | 眼科                 | 熊谷泰雅  | かきのき眼科（東京都品川区小山6-3-9ウエストヴィレジビルディング4F）                                     |
| 719 | 武蔵小山腎泌尿器クリニック  | 142-0062 | 東京都品川区小山4-3-12 TK武蔵小山ビル2F         | 03-6426-2832 | <a href="http://musako-uro.com/">http://musako-uro.com/</a>                             |                    | ○                  | 泌尿器科<br>内科<br>腎臓内科 | 還田 稔  | 昭和大学病院（東京都品川区旗の台1-5-8）NTT東日本関東病院（東京都品川区東五反田5-9-22）都立荏原病院（東京都大田区東雪谷4-5-10） |
| 720 | むらさき乳腺クリニック五反田 | 141-0031 | 東京都品川区西五反田2-19-2荒久ビル6F            | 03-3495-0881 | <a href="http://www.murasakibreastclinic.com/">http://www.murasakibreastclinic.com/</a> | ○                  | ○                  | 乳腺外科               | 池田 紫  |                                                                           |



電話や情報通信機器を用いて診療を実施する医療機関の一覧（東京都）

|     | 基本情報                  |          |                              |              |                                                                                                     | 事務連絡に基づく対応について     |                    |                      |                        |                                              |
|-----|-----------------------|----------|------------------------------|--------------|-----------------------------------------------------------------------------------------------------|--------------------|--------------------|----------------------|------------------------|----------------------------------------------|
|     | 施設名                   | 郵便番号     | 住所（都道府県から記載）                 | 電話番号         | ウェブサイトURL                                                                                           | 初診の電話等を用いた診療の実施の有無 | 再診の電話等を用いた診療の実施の有無 | 対応診療科                | 担当医師名                  | 対面診療が必要と判断した場合に連携する医療機関名（複数ある場合は複数、住所も併せて記載） |
| 721 | 医療法人社団めぐみ会めぐみクリニック目黒2 | 141-0021 | 東京都品川区上大崎2-12-2 ミズビル3F       | 03-5422-8391 | <a href="https://www.megumicl.com/2/">https://www.megumicl.com/2/</a>                               | ○                  | ○                  | 内科                   | 菊地 俊介<br>税所 俊光<br>田村 豊 |                                              |
| 722 | めぐろ駅東口メンタルクリニック       | 141-0021 | 東京都品川区上大崎3-3-1 オバタビル5F       | 03-6277-2188 | <a href="https://www.mh-mental.jp/">https://www.mh-mental.jp/</a>                                   |                    | ○                  | 心療内科<br>精神科          | 堺 英彰                   |                                              |
| 723 | 目黒みらい内科クリニック          | 141-0021 | 東京都品川区上大崎2-13-26 メイプルトップビル3F | 03-6721-6672 | <a href="https://www.meguro-clinic.net/">https://www.meguro-clinic.net/</a>                         | ○                  | ○                  | 内科<br>呼吸器内科<br>糖尿病内科 | 太田 啓介                  |                                              |
| 724 | もちづき内科クリニック           | 142-0041 | 東京都品川区戸越4-9-12               | 03-6426-2711 | <a href="https://www.mochizuki-medical.com/">https://www.mochizuki-medical.com/</a>                 | ○                  | ○                  | 内科<br>アレルギー科         | 望月香織                   | 東京品川病院<br>昭和大学付属病院<br>NTT東日本関東病院             |
| 725 | 山内クリニック               | 142-0062 | 東京都品川区小山5-17-4、1階            | 03-3781-2890 | <a href="http://www.yamauchicl.com">www.yamauchicl.com</a>                                          |                    | ○                  | 内科                   | 山内健義                   |                                              |
| 726 | 山崎眼科                  | 142-0051 | 東京都品川区平塚2-15-15 1F           | 03-3782-6666 | <a href="http://www.pluto.dti.ne.jp/yamazaki-ganka/">http://www.pluto.dti.ne.jp/yamazaki-ganka/</a> |                    | ○                  | 眼科                   | 山崎 斉                   |                                              |
| 727 | ゆきこどもクリニック            | 142-0053 | 東京都品川区中延5-3-8-1F             | 03-3784-2555 | <a href="http://yuki-kodomo.com">http://yuki-kodomo.com</a>                                         | ○                  | ○                  | 小児科・内科・アレルギー科        | 竹下 由紀子                 | 昭和大学病院（東京都品川区旗の台1-5-8）荏原病院（東京都大田区東雪谷4-5-10）  |
| 728 | ゆたか診療所                | 142-0042 | 東京都品川区豊町4-18-21              | 03-3781-4723 | <a href="http://www.yutakashin.jp">http://www.yutakashin.jp</a>                                     |                    | ○                  | 内科<br>整形外科<br>皮膚科    | 権守 光夫<br>吉岡 雅之         |                                              |
| 729 | 依田医院                  | 142-0041 | 東京都品川区戸越6-7-26-201           | 03-3781-2865 |                                                                                                     |                    | ○                  | 内科                   | 依田欣之                   |                                              |

電話や情報通信機器を用いて診療を実施する医療機関の一覧（東京都）

|     | 基本情報                  |          |                               |              |                                                                                                                                                 | 事務連絡に基づく対応について     |                    |                       |         |                                                  |
|-----|-----------------------|----------|-------------------------------|--------------|-------------------------------------------------------------------------------------------------------------------------------------------------|--------------------|--------------------|-----------------------|---------|--------------------------------------------------|
|     | 施設名                   | 郵便番号     | 住所（都道府県から記載）                  | 電話番号         | ウェブサイトURL                                                                                                                                       | 初診の電話等を用いた診療の実施の有無 | 再診の電話等を用いた診療の実施の有無 | 対応診療科                 | 担当医師名   | 対面診療が必要と判断した場合に連携する医療機関名（複数ある場合は複数、住所も併せて記載）     |
| 730 | わかばやし眼科               | 142-0053 | 東京都品川区中延3-2-18-101            | 03-6421-5900 | <a href="https://www.wakabayashi-ganka.jp/">https://www.wakabayashi-ganka.jp/</a>                                                               |                    | ○                  | 眼科                    | 若林俊子    |                                                  |
| 731 | 和田外科醫院                | 142-0051 | 東京都品川区平塚1-8-18                | 03-3781-4936 |                                                                                                                                                 |                    | ○                  | 整形外科<br>内科            | 和田信裕 明珠 |                                                  |
| 732 | 和田整形外科                | 142-0041 | 東京都品川区戸越6-8-20                | 03-5498-2555 | <a href="https://www.i-jin.jp/tokyo/09_sinagawa/03_wada_seikei/index.html">https://www.i-jin.jp/tokyo/09_sinagawa/03_wada_seikei/index.html</a> | ○                  | ○                  | 整形外科                  | 和田次郎    | 昭和大学病院（品川区旗の台1-5-8）<br>NTT東日本関東病院（品川区東五反田5-9-22） |
| 733 | 東京シティクリニック品川          | 140-0003 | 東京都品川区八潮5-10-27<br>パトリア品川別館2F | 03-3790-2551 | <a href="http://tokyocityclinic-shinagawa.com/">http://tokyocityclinic-shinagawa.com/</a>                                                       |                    | ○                  | 内科<br>小児科             | 近藤 敬子   | 東京品川病院（東京都品川区東大井6-3-22）<br>愛育病院（東京都港区芝浦1-16-10）  |
| 734 | 奥秋整形外科                | 140-0013 | 東京都品川区南大井6-2-4-9<br>興産大森ビル4階  | 03-5753-8282 | <a href="https://www.okuaki-seikei.com">https://www.okuaki-seikei.com</a>                                                                       |                    | ○                  | 整形外科                  | 奥秋 保    |                                                  |
| 735 | KARADA内科クリニック<br>五反田院 | 1410031  | 東京都品川区西五反田1-2-8 10F           | 03-3495-0192 | <a href="https://karada-naika.com/">https://karada-naika.com/</a>                                                                               | ○                  | ○                  | 内科                    | 佐藤昭裕    |                                                  |
| 736 | たつのこどもクリニック           | 140-0014 | 東京都品川区大井2-2-11 1F             | 03-3775-8600 |                                                                                                                                                 | ○                  | ○                  | 小児科                   | 田角恭子    |                                                  |
| 737 | たつのシティタワー<br>クリニック    | 140-0014 | 東京都品川区大井1-31-1 102            | 03-6303-8737 | <a href="https://tatsuno-cityclinic.com/">https://tatsuno-cityclinic.com/</a>                                                                   | ○                  |                    | 小児科<br>小児神経科<br>小児精神科 | 田角 勝    | 昭和大学病院（東京都品川区旗の台1-5-8）<br>東邦大学病院（東京都大田区大森6-11-1） |
| 738 | みんなのクリニック<br>大井町      | 140-0004 | 東京都品川区南品川6-15-5               | 03-6433-0280 | <a href="https://oimachi.minnano.clinic/">https://oimachi.minnano.clinic/</a>                                                                   | ○                  | ○                  | 内科 小児科<br>皮膚科<br>泌尿器科 | 年森慎一    | 東京品川病院<br>（東京都品川区東大井6丁目3-22）                     |

電話や情報通信機器を用いて診療を実施する医療機関の一覧（東京都）

|     | 基本情報                           |          |                                |              |                                                                             | 事務連絡に基づく対応について     |                    |                               |                               |                                              |
|-----|--------------------------------|----------|--------------------------------|--------------|-----------------------------------------------------------------------------|--------------------|--------------------|-------------------------------|-------------------------------|----------------------------------------------|
|     | 施設名                            | 郵便番号     | 住所（都道府県から記載）                   | 電話番号         | ウェブサイトURL                                                                   | 初診の電話等を用いた診療の実施の有無 | 再診の電話等を用いた診療の実施の有無 | 対応診療科                         | 担当医師名                         | 対面診療が必要と判断した場合に連携する医療機関名（複数ある場合は複数、住所も併せて記載） |
| 739 | 大崎消化器内科クリニック                   | 141-0001 | 東京都品川区北品川5-4-1<br>大崎プライトプラザ2階  | 03-5791-3388 | <a href="https://www.osaki-clinic.com/">https://www.osaki-clinic.com/</a>   |                    | ○                  | 内科                            | 倉岡 賢輔<br>大岩 弘子                | NTT東日本関東病院<br>(東京都品川区東五反田5-9-22)             |
| 740 | みやざきRCクリニック                    | 140-0001 | 東京都品川区北品川2-23-2-3F             | 03-5460-1159 | <a href="https://kita-shinagawa.clinic">https://kita-shinagawa.clinic</a>   |                    | ○                  | 内科<br>呼吸器内科                   | 宮崎 雅樹                         |                                              |
| 741 | 戸越銀座駅近内科クリニック                  | 142-0063 | 東京都品川区平塚1-7-16-1F              | 03-5749-1054 | <a href="http://togoshinaika.com/">http://togoshinaika.com/</a>             | ○                  | ○                  | 内科                            | 市川 晋也                         |                                              |
| 742 | 磯村クリニック                        | 152-0023 | 東京都目黒区八雲1-10-17                | 03-3723-8841 | <a href="http://www.is-clinic.com">http://www.is-clinic.com</a>             |                    | ○                  | 皮膚科・婦人科<br>漢方内科               | 磯村知子                          |                                              |
| 743 | 伊藤小児科・アレルギー科                   | 152-0034 | 東京都目黒区緑が丘3-8-8                 | 03-3729-1312 |                                                                             | ○                  | ○                  | 小児科<br>アレルギー科                 | 伊藤 幸生                         |                                              |
| 744 | 医療法人社団一星会<br>目黒通り消化器外科・内科クリニック | 153-0064 | 東京都目黒区下目黒6-1-27, 1F            | 03-3713-1117 | <a href="https://meguro-ikamera.com/">https://meguro-ikamera.com/</a>       | ○                  | ○                  | 内科                            | 川口 大輔                         |                                              |
| 745 | 医療法人社団恵俊会<br>こども医院             | 152-0002 | 東京都目黒区目黒本町5-27-17-101          | 03-5768-7317 |                                                                             | ○                  | ○                  | 内科                            | 近藤俊彦                          | 昭和大学病院（東京都品川区旗の台1-5-8）                       |
| 746 | 医療法人社団航洋会<br>目黒通りハートクリニック      | 152-0004 | 東京都目黒区鷹番1-10-2-1F              | 03-6303-3328 | <a href="http://meguro-heartclinic.com/">http://meguro-heartclinic.com/</a> | ○                  | ○                  | 内科<br>小児科                     | 安田 洋                          |                                              |
| 747 | 医療法人社団法山会<br>山下診療所自由が丘         | 152-0035 | 東京都目黒区自由が丘1-30-3<br>自由が丘東急ビル7F | 03-3724-3811 | <a href="http://hozankai.com/">http://hozankai.com/</a>                     | ○                  | ○                  | 内科・循環器<br>呼吸器・血液<br>消化器・アレルギー | 山下・森川<br>軽部・長門<br>三神・中村<br>都築 |                                              |

電話や情報通信機器を用いて診療を実施する医療機関の一覧（東京都）

|     | 基本情報                     |          |                                       |              |                                                                             | 事務連絡に基づく対応について     |                    |              |                                                             |                                              |
|-----|--------------------------|----------|---------------------------------------|--------------|-----------------------------------------------------------------------------|--------------------|--------------------|--------------|-------------------------------------------------------------|----------------------------------------------|
|     | 施設名                      | 郵便番号     | 住所（都道府県から記載）                          | 電話番号         | ウェブサイトURL                                                                   | 初診の電話等を用いた診療の実施の有無 | 再診の電話等を用いた診療の実施の有無 | 対応診療科        | 担当医師名                                                       | 対面診療が必要と判断した場合に連携する医療機関名（複数ある場合は複数、住所も併せて記載） |
| 748 | 医療法人社団めぐみ会 自由が丘メディカルプラザ  | 152-0035 | 東京都目黒区自由が丘2-11-16<br>自由が丘日能研ビル2F      | 03-6421-1080 | <a href="https://www.jiyugaokamp.com/">https://www.jiyugaokamp.com/</a>     | ○                  | ○                  | 小児科<br>内科    | 高嶋能文<br>坂本真保<br>齋藤義弘<br>田村豊<br>山岸征嗣<br>早田輝子<br>小船雅義<br>須藤幸訓 |                                              |
| 749 | 医療法人社団めぐみ会 自由が丘メディカルプラザ2 | 152-0035 | 東京都目黒区自由が丘2-11-16ニューパルビュー<br>3F       | 03-5731-3565 | <a href="https://www.jiyugaokamp.com/s/">https://www.jiyugaokamp.com/s/</a> |                    | ○                  | 小児科          | 高嶋 能文<br>大野 貴美子<br>坂本 真保<br>齋藤 義弘<br>森川 日出男                 |                                              |
| 750 | 医療法人社団 順信会 目黒整形外科内科      | 152-0002 | 東京都目黒区目黒本町6-1-2 友愛ビル1階                | 03-5725-3677 | <a href="http://www.meguro-seikei.com">http://www.meguro-seikei.com</a>     |                    | ○                  | 整形外科<br>内科   | 鈴木和也（整形）<br>鈴木 仁（内科）                                        |                                              |
| 751 | ウェルビーイングクリニック駒沢公園        | 152-0021 | 東京都目黒区東が丘2-15-1-102                   | 03-6804-0644 | <a href="https://clinic.zenplace.co.jp/">https://clinic.zenplace.co.jp/</a> | ○                  | ○                  | 循環器内科/内科     | 布施 淳                                                        | 国立病院機構東京医療センター（東京都目黒区東が丘2-5-1）               |
| 752 | ウォブクリニック中目黒              | 153-0061 | 東京都目黒区中目黒1-10-23シティホームズ中目黒<br>アネックス2F | 0120-411-281 | <a href="https://wove.jp/">https://wove.jp/</a>                             | ○                  | ○                  | 美容皮膚科<br>皮膚科 | 高瀬 聡子<br>太田 洋美                                              |                                              |
| 753 | おのおの内科外科クリニック            | 153-0063 | 東京都目黒区目黒4-26-5 上田ビル1階                 | 03-6303-3822 | <a href="https://ono-naikageka.jp/">https://ono-naikageka.jp/</a>           | ○                  | ○                  | 内科<br>外科     | 大野 雅央                                                       | 東京共済病院（東京都目黒区中目黒2-3-8）                       |
| 754 | おおはしさくらクリニック             | 153-0044 | 東京都目黒区大橋2-23-1西渋谷ハイウエービル5<br>F        | 03-6277-1017 |                                                                             |                    | ○                  | 内科、糖尿病科      | 大井 一輝<br>小森 広美                                              |                                              |
| 755 | 学芸大西口クリニック               | 152-0004 | 東京都目黒区鷹番3-7-6NEWWEST3階                | 03-5773-0615 | <a href="http://www.gakugeidai.jp">www.gakugeidai.jp</a>                    | ○                  | ○                  | 内科皮膚科        | 佐藤克二郎                                                       |                                              |
| 756 | 加藤内科クリニック                | 153-0051 | 東京都目黒区上目黒3-1-14                       | 03-3792-8710 | <a href="http://www.katoh-med.jp/">http://www.katoh-med.jp/</a>             | ○                  | ○                  | 内科           | 加藤 陽一 柴田 祥子<br>加藤 裕佳子                                       | 東京共済病院（東京都目黒区中目黒2-3-8）                       |

電話や情報通信機器を用いて診療を実施する医療機関の一覧（東京都）

|     | 基本情報           |          |                             |              |                                                                                           | 事務連絡に基づく対応について     |                    |                    |                             |                                                    |
|-----|----------------|----------|-----------------------------|--------------|-------------------------------------------------------------------------------------------|--------------------|--------------------|--------------------|-----------------------------|----------------------------------------------------|
|     | 施設名            | 郵便番号     | 住所（都道府県から記載）                | 電話番号         | ウェブサイトURL                                                                                 | 初診の電話等を用いた診療の実施の有無 | 再診の電話等を用いた診療の実施の有無 | 対応診療科              | 担当医師名                       | 対面診療が必要と判断した場合に連携する医療機関名（複数ある場合は複数、住所も併せて記載）       |
| 757 | 北神経内科平山記念クリニック | 153-0064 | 東京都目黒区下目黒5-16-16            | 03-5768-1235 | <a href="https://www.kitashinkei.com/">https://www.kitashinkei.com/</a>                   | ○                  | ○                  | 神経内科<br>内科         | 北 耕平                        | 東京共済病院（目黒区）<br>日本赤十字社医療センター（渋谷区）                   |
| 758 | 銀座よしえクリニック都立大院 | 152-0032 | 東京都目黒区平町 1-23-14            | 0120-398-885 | <a href="https://www.ginzabiyou.com/">https://www.ginzabiyou.com/</a>                     | ○                  | ○                  | 内科<br>皮膚科<br>美容皮膚科 | 青木 晃<br>廣瀬 嘉恵               |                                                    |
| 759 | 五本木クリニック       | 152-0001 | 東京都目黒区中央町2-18-14ネオアージュ祐天寺1F | 03-5721-7000 | <a href="http://gohongi-clinic.com">gohongi-clinic.com</a>                                | ○                  | ○                  | 内科/泌尿器科            | 桑満 おさむ                      | 東京医療センター（東京都目黒区東が丘2-5-1）<br>東京共済病院（東京都目黒区中目黒2-3-8） |
| 760 | すげがわクリニック      | 153-0064 | 東京都目黒区下目黒3-13-8             | 03-3760-8642 |                                                                                           | ○                  | ○                  | 内科 小児科<br>循環器科     | 祐川隆平                        |                                                    |
| 761 | 洗足駅前クリニック      | 152-0012 | 東京都目黒区洗足2-25-19 アソルティ洗足1階   | 03-3786-1009 | <a href="https://senzoku-clinic.com">https://senzoku-clinic.com</a>                       | ○                  | ○                  | 内科・消化器内科<br>皮膚科    | 齋藤 佑介<br>齋藤 美穂              |                                                    |
| 762 | 友成クリニック        | 153-0063 | 東京都目黒区目黒4-10-10             | 03-3715-1181 |                                                                                           |                    | ○                  | 内科                 | 友成 治夫                       |                                                    |
| 763 | 都立大整形外科クリニック   | 152-0032 | 東京都目黒区平町1-26-3 スミール都立大202   | 03-6404-8550 | <a href="https://ar-ex.jp/toritsudai">https://ar-ex.jp/toritsudai</a>                     |                    | ○                  | 整形外科               | 山田祐子<br>林英俊<br>平田正純<br>清水勇樹 |                                                    |
| 764 | なんば耳鼻咽喉科       | 152-0012 | 東京都目黒区洗足 2-7-1 5-2 0 1      | 03-5842-1155 | <a href="http://namba-clinic.com">http://namba-clinic.com</a>                             |                    | ○                  | 耳鼻咽喉科              | 難波 真由美                      |                                                    |
| 765 | ふくしま内科こどもクリニック | 152-0023 | 東京都目黒区八雲1-4-17              | 03-5731-2201 | <a href="https://fukushima-naika-kodomo-cl.jp/">https://fukushima-naika-kodomo-cl.jp/</a> | ○                  | ○                  | 内科<br>小児科          | 福島 優                        |                                                    |

電話や情報通信機器を用いて診療を実施する医療機関の一覧（東京都）

|     | 基本情報             |          |                           |              |                                                                                   | 事務連絡に基づく対応について     |                    |                       |              |                                                                             |
|-----|------------------|----------|---------------------------|--------------|-----------------------------------------------------------------------------------|--------------------|--------------------|-----------------------|--------------|-----------------------------------------------------------------------------|
|     | 施設名              | 郵便番号     | 住所（都道府県から記載）              | 電話番号         | ウェブサイトURL                                                                         | 初診の電話等を用いた診療の実施の有無 | 再診の電話等を用いた診療の実施の有無 | 対応診療科                 | 担当医師名        | 対面診療が必要と判断した場合に連携する医療機関名（複数ある場合は複数、住所も併せて記載）                                |
| 766 | 福田医院             | 153-0061 | 東京都目黒区中目黒3-22-11          | 03-3712-2868 |                                                                                   |                    | ○                  | 内科 小児科                | 福田 達弥        |                                                                             |
| 767 | ふるかわメディカルクリニック   | 152-0023 | 東京都目黒区八雲5-15-5            | 03-6459-5539 | <a href="http://www.furukawa-mc.com">http://www.furukawa-mc.com</a>               |                    | ○                  | 内科<br>皮膚科             | 古川祐介<br>古川直子 |                                                                             |
| 768 | ポポロ小児科自由が丘       | 152-0035 | 東京都目黒区自由が丘1-24-14         | 03-5731-8806 | <a href="http://popolo.tokyo/">http://popolo.tokyo/</a>                           | ○                  | ○                  | 小児科                   | 竹内 邦子        |                                                                             |
| 769 | 目黒ケイホームクリニック     | 153-0061 | 東京都目黒区中目黒4-5-1-エースビル2階    | 03-5722-5500 | <a href="http://www.megurokhome@gmail.com">www.megurokhome@gmail.com</a>          | ○                  | ○                  | 内科、呼吸器内科、アレルギー科、循環器内科 | 安藤克利         |                                                                             |
| 770 | もも耳鼻咽喉科          | 152-0032 | 東京都目黒区平町1-27-8 FPC 平町ビル3階 | 03-3718-3387 |                                                                                   |                    | ○                  | 耳鼻咽喉科                 | 山崎 ももこ       |                                                                             |
| 771 | 祐天寺たけまさクリニック     | 153-0052 | 東京都目黒区祐天寺2-15-6-101       | 03-5768-1336 | <a href="http://www.takemasa-clinic.com">http://www.takemasa-clinic.com</a>       | ○                  | ○                  | 内科                    | 長 剛正         |                                                                             |
| 772 | 祐天寺ウィメンズヘルスクリニック | 153-0052 | 東京都目黒区祐天寺2-7-23 2F        | 03-5708-5081 | <a href="http://www.satoh-womenshealth.com">http://www.satoh-womenshealth.com</a> | ○                  | ○                  | 産婦人科                  | 佐藤 真之介       |                                                                             |
| 773 | よう子 みんなのクリニック    | 153-0051 | 東京都目黒区上目黒2-42-11グレイス中目黒1階 | 03-6412-8188 | <a href="https://yoko-minnano.clinic/">https://yoko-minnano.clinic/</a>           | ○                  | ○                  | 内科<br>小児科             | 眞壁 陽子        |                                                                             |
| 774 | 吉田医院             | 152-0003 | 東京都目黒区碑文谷1-28-11          | 03-3712-3396 | <a href="http://yosida-iin.com">http://yosida-iin.com</a>                         | ○                  | ○                  | 内科神経内科                | 吉田 裕         | 厚生中央病院（東京都目黒区三田1-11-7）<br>東京医療センター（東京都目黒区東が丘2-5-1）<br>荏原病院（東京都大田区東雪谷4-5-10） |

電話や情報通信機器を用いて診療を実施する医療機関の一覧（東京都）

|     | 基本情報           |          |                                   |              |                                                                             | 事務連絡に基づく対応について     |                    |                                                     |                |                                                                                                                                       |
|-----|----------------|----------|-----------------------------------|--------------|-----------------------------------------------------------------------------|--------------------|--------------------|-----------------------------------------------------|----------------|---------------------------------------------------------------------------------------------------------------------------------------|
|     | 施設名            | 郵便番号     | 住所（都道府県から記載）                      | 電話番号         | ウェブサイトURL                                                                   | 初診の電話等を用いた診療の実施の有無 | 再診の電話等を用いた診療の実施の有無 | 対応診療科                                               | 担当医師名          | 対面診療が必要と判断した場合に連携する医療機関名（複数ある場合は複数、住所も併せて記載）                                                                                          |
| 775 | ロココクリニック中目黒    | 153-0043 | 東京都目黒区東山1-6-5シティハウス中目黒ステーションコート1階 | 03-5722-6565 | <a href="https://loco-clinic.com/">https://loco-clinic.com/</a>             | ○                  | ○                  | 内科、小児科                                              | 嘉村 洋志<br>瀬田 宏哉 | 東京医療センター（東京都目黒区東が丘2-5-1）                                                                                                              |
| 776 | にっとのクリニック      | 152-0011 | 東京都目黒区原町2-1-24                    | 03-5704-4092 | <a href="https://nittono-clinic.com">https://nittono-clinic.com</a>         | ○                  | ○                  | 小児科                                                 | 荻原(谷川)仁美       |                                                                                                                                       |
| 777 | 自由が丘内科クリニック    | 152-0035 | 東京都目黒区自由が丘2-8-17グランデ自由が丘1F        | 03-3723-7888 | <a href="https://jivugaoka-naika.clinic">https://jivugaoka-naika.clinic</a> | ○                  | ○                  | 消化器内科、内科、循環器内科、呼吸器内科、内分泌代謝内科、アレルギー科、肛門内科、泌尿器科、皮膚科など | 松原 健朗          | 三宿病院(東京都目黒区上目黒5丁目33-12)<br>東京医療センター(東京都目黒区東が丘2丁目5-1)昭和大学病院(東京都品川区旗の台1丁目5-8)など                                                         |
| 778 | あさもとクリニック      | 144-0052 | 東京都大田区蒲田3-18-12-102               | 03-5480-9633 | <a href="http://asamoto-clinic.com/">http://asamoto-clinic.com/</a>         |                    | ○                  | 脳神経外科<br>一般内科<br>アレルギー科                             | 朝元 美利          |                                                                                                                                       |
| 779 | 池上さいとう内科クリニック  | 146-0082 | 東京都大田区池上8-23-15                   | 03-3757-3110 | <a href="https://www.ikegami-saito.com">https://www.ikegami-saito.com</a>   |                    | ○                  | 内科<br>脳神経内科                                         | 齋藤 悠           | 昭和大学病院(東京都品川区旗の台1-5-8)<br>東邦大学医療センター大森病院(東京都大田区大森西6-11-1)<br>池上総合病院(東京都大田区池上6-1-19)<br>松井病院(東京都大田区池上2-7-10)<br>荏原病院(東京都大田区東雪谷四丁目5-10) |
| 780 | いけがみ耳鼻咽喉科クリニック | 146-0082 | 東京都大田区池上3-30-17                   | 03-5700-6733 | <a href="https://ikegami-jibika.com/">https://ikegami-jibika.com/</a>       |                    | ○                  | 耳鼻咽喉科                                               | 工藤 睦男          |                                                                                                                                       |
| 781 | 池田耳鼻咽喉科医院      | 143-0015 | 東京都大田区大森西3-21-13 2階               | 03-3761-0792 |                                                                             |                    | ○                  | 耳鼻咽喉科<br>小児科<br>内科                                  | 池田 文           | 東邦大学医療センター大森病院（東京都大田区大森西6-11-1）                                                                                                       |
| 782 | いしがき耳鼻咽喉科クリニック | 146-0093 | 東京都大田区矢口1-19-5エスポワール矢口1F          | 03-3757-3387 | <a href="https://ishigaki-ent.com/">https://ishigaki-ent.com/</a>           | ○                  | ○                  | 耳鼻咽喉科                                               | 石垣 高志          |                                                                                                                                       |
| 783 | 伊丹内科医院         | 145-0065 | 東京都大田区東雪谷2-17-1、グランディ雪谷1階         | 03-3748-0028 | <a href="https://www.itaminaika.com">https://www.itaminaika.com</a>         | ○                  | ○                  | 内科                                                  | 伊丹 滋人          |                                                                                                                                       |

電話や情報通信機器を用いて診療を実施する医療機関の一覧（東京都）

|     | 基本情報                         |          |                                |              |                                         | 事務連絡に基づく対応について     |                    |                                                              |                                                                                     |                                              |
|-----|------------------------------|----------|--------------------------------|--------------|-----------------------------------------|--------------------|--------------------|--------------------------------------------------------------|-------------------------------------------------------------------------------------|----------------------------------------------|
|     | 施設名                          | 郵便番号     | 住所（都道府県から記載）                   | 電話番号         | ウェブサイトURL                               | 初診の電話等を用いた診療の実施の有無 | 再診の電話等を用いた診療の実施の有無 | 対応診療科                                                        | 担当医師名                                                                               | 対面診療が必要と判断した場合に連携する医療機関名（複数ある場合は複数、住所も併せて記載） |
| 784 | いまい耳鼻咽喉科                     | 145-0063 | 東京都大田区南千束3-18-12               | 03-3726-3387 | http://home.a01.itscom.net/ima<br>ijibi |                    | ○                  | 耳鼻咽喉科                                                        | 今井容子                                                                                |                                              |
| 785 | 医療法人財団 安田病院                  | 143-0016 | 東京都大田区大森北1-11-18               | 03-3761-1023 | https://www.yasuda-hsp.jp/              | ○                  | ○                  | 整形外科<br>整形外科<br>整形外科<br>外科<br>外科<br>内科<br>内科                 | 明妻 裕孝<br>楠瀬 浩一<br>松尾 亮平<br>浅沼 雄太<br>河野 修三<br>安田 雄一郎<br>小池 牧子<br>袋 瑛子                |                                              |
| 786 | 医療法人社団オーシーエフシー会大川こども&内科クリニック | 146-0095 | 東京都大田区多摩川1-6-16                | 03-3758-0920 | https://ocfc.jp                         |                    | ○                  | 小児科 内科                                                       | 大川 洋二                                                                               |                                              |
| 787 | 医療法人社団くどうちあき脳神経外科クリニック       | 143-0016 | 東京都大田区大森北1-23-10               | 03-5767-0226 | https://kudohchiaki.jp/                 | ○                  | ○                  | 脳神経外科<br>心療内科                                                | 工藤 千秋                                                                               |                                              |
| 788 | 医療法人社団清泉会 山王リハビリ・クリニック       | 145-0065 | 東京都大田区東雪谷3-4-2                 | 03-5754-2672 | https://www.sanno-rc.com/               | ○                  | ○                  | リハビリテー<br>ション科・整形<br>外科・内科                                   | 森 英二/前島<br>早代/安部 佑/<br>森 武男                                                         |                                              |
| 789 | 医療法人社団誠知会 ひだまりクリニック          | 144-0056 | 東京都大田区西六郷1-18-11               | 03-6715-9388 | http://www.seichikai.or.jp              | ○                  | ○                  | 内科                                                           | 松本 昌和                                                                               |                                              |
| 790 | 医療法人社団奏那 ぞうしきこどもクリニック        | 144-0055 | 東京都大田区仲六郷二丁目45番地16号            | 03-3733-2288 | https://zoshiki.jp/                     | ○                  | ○                  | 小児科、アレルギー科                                                   | 植松浩司                                                                                | 東邦大学大森病院（東京都大田区大森西6丁目1-1）                    |
| 791 | 医療法人社団 羽田バス通りクリニック           | 144-0043 | 東京都大田区羽田3-3-13 鈴久ビルマン<br>ション1階 | 03-5735-0808 | http://haneda-bus-road-<br>clinic.com/  |                    | ○                  | 内科、消化器内<br>科、外科、皮膚<br>科                                      | 田代 健一                                                                               |                                              |
| 792 | 医療法人社団 松井病院                  | 146-0082 | 東京都大田区池上2-7-10                 | 03-3752-1111 | http://www.matsuihsp.or.jp/             |                    | ○                  | 循環器内科<br>消化器内科<br>呼吸器内科<br>腎臓内科<br>糖尿病内科<br>外科<br>整形外科<br>眼科 | 橘秀昭、西尾和<br>晃、松井秀夫、<br>宮田一、吉田俊<br>太郎、多田浩<br>子、荒瀬勉、椛<br>澤由博、定方博<br>史、岡良臣、林<br>まりあ、下平和 |                                              |



電話や情報通信機器を用いて診療を実施する医療機関の一覧（東京都）

|     | 基本情報                     |          |                            |              |                                                                                                           | 事務連絡に基づく対応について     |                    |                               |                      |                                                                                     |
|-----|--------------------------|----------|----------------------------|--------------|-----------------------------------------------------------------------------------------------------------|--------------------|--------------------|-------------------------------|----------------------|-------------------------------------------------------------------------------------|
|     | 施設名                      | 郵便番号     | 住所（都道府県から記載）               | 電話番号         | ウェブサイトURL                                                                                                 | 初診の電話等を用いた診療の実施の有無 | 再診の電話等を用いた診療の実施の有無 | 対応診療科                         | 担当医師名                | 対面診療が必要と判断した場合に連携する医療機関名（複数ある場合は複数、住所も併せて記載）                                        |
| 793 | 医療法人社団癒合会 AI和合クリニック      | 144-0033 | 東京都大田区東糀谷2-11-18 1階        | 03-6423-2902 | <a href="https://www.takanawa-clinic.com/aiwagoclinic/">https://www.takanawa-clinic.com/aiwagoclinic/</a> | ○                  | ○                  | 内科                            | 長岡 美妃                |                                                                                     |
| 794 | 医療法人社団 祐真会 マチノマ大森内科クリニック | 143-0015 | 東京都大田区大森西3-1-38マチノマ大森3階    | 03-5471-5556 | <a href="https://machinoma-naika.com/">https://machinoma-naika.com/</a>                                   | ○                  | ○                  | 内科<br>消化器内科<br>呼吸器内科<br>循環器内科 | 河合 剛                 | 東邦大学医療センター大森病院（東京都大田区大森西6-11-1）<br>牧田総合病院（東京都大森北1-34-6）                             |
| 795 | 医療法人社団緑清会 しのはらクリニック      | 144-0051 | 東京都大田区西蒲田7-44-6-2F         | 03-3737-4114 | <a href="http://shinoharacclinic.com/">http://shinoharacclinic.com/</a>                                   |                    | ○                  | 内科<br>消化器内科                   | 篠原玄夫<br>篠原正夫<br>篠原美絵 |                                                                                     |
| 796 | 岩崎内科クリニック                | 146-0095 | 東京都大田区多摩川1-23-8            | 03-3759-3771 | <a href="https://iwasakicl.com">https://iwasakicl.com</a>                                                 |                    | ○                  | 内科                            | 武藤 浩<br>武藤 ます江       |                                                                                     |
| 797 | うつのみや内科クリニック             | 145-0062 | 東京都大田区北千束1-44-1リバープラザ大岡山1階 | 03-5726-9807 | <a href="http://www.utsunomiya-cl.jp/">http://www.utsunomiya-cl.jp/</a>                                   | ○                  | ○                  | 内科                            | 宇都宮 幹子               |                                                                                     |
| 798 | 梅屋敷内科クリニック               | 144-0052 | 東京都大田区蒲田2-2-13ヴィラはなぞの一階    | 03-3732-2831 | <a href="https://umeyashiki-naika.com/">https://umeyashiki-naika.com/</a>                                 | ○                  | ○                  | 内科・呼吸器内科<br>消化器内科             | 辻川 雄                 |                                                                                     |
| 799 | 大田病院附属大森中診療所             | 143-0014 | 東京都大田区大森中1-22-2            | 03-6404-2301 | <a href="http://www.oomorinakashin.jp/">http://www.oomorinakashin.jp/</a>                                 |                    | ○                  | 内科                            | 山本 博                 |                                                                                     |
| 800 | 大森赤十字病院                  | 143-8527 | 東京都大田区中央4-30-1             | 03-3775-3111 | <a href="http://omori.jrc.or.jp/">http://omori.jrc.or.jp/</a>                                             |                    | ○                  | 呼吸器内科他全24科                    | 各診療科医師               |                                                                                     |
| 801 | 大森町駅前内科小児科クリニック          | 143-0015 | 東京都大田区大森西3-20-9 1F         | 03-6423-0428 | <a href="https://omorimachi.com">https://omorimachi.com</a>                                               | ○                  | ○                  | 内科、小児科、アレルギー科                 | 柳澤 亮<br>田口 真寿美       | 東邦大学大森病院（東京都大田区大森西6丁目11-1）<br>東京労災病院（東京都大田区大森南4丁目13-21）<br>大森赤十字病院（東京都大田区中央4丁目30-1） |

電話や情報通信機器を用いて診療を実施する医療機関の一覧（東京都）

|     | 基本情報           |          |                            |              |                                                   | 事務連絡に基づく対応について     |                    |              |               |                                                                                |
|-----|----------------|----------|----------------------------|--------------|---------------------------------------------------|--------------------|--------------------|--------------|---------------|--------------------------------------------------------------------------------|
|     | 施設名            | 郵便番号     | 住所（都道府県から記載）               | 電話番号         | ウェブサイトURL                                         | 初診の電話等を用いた診療の実施の有無 | 再診の電話等を用いた診療の実施の有無 | 対応診療科        | 担当医師名         | 対面診療が必要と判断した場合に連携する医療機関名（複数ある場合は複数、住所も併せて記載）                                   |
| 802 | おばら消化器肛門クリニック  | 146-0093 | 東京都大田区矢口2-11-23            | 03-3750-8218 | obara-clinic.com                                  | ○                  | ○                  | 内科<br>肛門科    | 小原 邦彦         | 池上総合病院（東京都大田区池上6-1-19）<br>大森赤十字病院（東京都大田区中央4-30-1）<br>東邦大学大森病院（東京都大田区大森西6-11-1） |
| 803 | 小原りぼんクリニック     | 146-0085 | 東京都大田区久が原2-17-18           | 03-6410-6110 | https://obara-rbn.com/                            |                    | ○                  | 内科           | 小原 太郎         |                                                                                |
| 804 | 鎌田医院           | 144-0033 | 東京都大田区東糀谷2-7-16            | 03-3741-0662 | https://www.hospita.jp/detail/212/announce/16397/ |                    | ○                  | 内科           | 濱部 晃<br>松下麻衣子 |                                                                                |
| 805 | 蒲田いだ耳鼻咽喉科      | 144-0052 | 東京都大田区蒲田5-28-7             | 03-3735-3387 | https://kamata-ida-ent.com                        | ○                  | ○                  | 耳鼻咽喉科        | 井田 裕太郎        |                                                                                |
| 806 | 蒲田医師会立西六郷診療所   | 144-0056 | 東京都大田区西六郷3-1-7             | 03-6428-6855 | https://nishiroku-cl.com/                         | ○                  | ○                  | 内科<br>小児科    | 大藏美奈子<br>他    |                                                                                |
| 807 | 蒲田内科クリニック      | 144-0052 | 東京都大田区蒲田5-28-18 2階         | 03-6715-7337 | http://kamata-cl.jp                               |                    | ○                  | 内科<br>循環器内科  | 浅見 光一         | 東京蒲田医療センター（大田区南蒲田2-19-2）                                                       |
| 808 | 銀座よしえクリニック大岡山院 | 145-0062 | 東京都大田区北千束1-45-11           | 0120-398-885 | https://www.ginzabiyou.com/                       | ○                  | ○                  | 皮膚科<br>美容皮膚科 | 担当医           |                                                                                |
| 809 | 久が原こどもクリニック    | 146-0085 | 東京都大田区久が原5-14-14ライオンズプラザ1F | 03-5747-2802 |                                                   | ○                  | ○                  | 小児科、内科       | 森川和洋<br>森川日出男 | 荏原病院（東京都大田区東雪谷4-5-10）                                                          |
| 810 | くわはら耳鼻咽喉科クリニック | 145-0064 | 東京都大田区上池台5-32-4            | 03-5754-8733 | http://www.kuwahara-jibika.jp/                    | ○                  | ○                  | 耳鼻咽喉科        | 桑原 大輔         |                                                                                |

電話や情報通信機器を用いて診療を実施する医療機関の一覧（東京都）

|     | 基本情報                      |          |                                               |              |                                                                                         | 事務連絡に基づく対応について     |                    |                       |                                          |                                              |
|-----|---------------------------|----------|-----------------------------------------------|--------------|-----------------------------------------------------------------------------------------|--------------------|--------------------|-----------------------|------------------------------------------|----------------------------------------------|
|     | 施設名                       | 郵便番号     | 住所（都道府県から記載）                                  | 電話番号         | ウェブサイトURL                                                                               | 初診の電話等を用いた診療の実施の有無 | 再診の電話等を用いた診療の実施の有無 | 対応診療科                 | 担当医師名                                    | 対面診療が必要と判断した場合に連携する医療機関名（複数ある場合は複数、住所も併せて記載） |
| 811 | 京浜診療所                     | 144-0046 | 東京都大田区東六郷1-27-4                               | 03-3734-7288 | <a href="http://www.keihin-shin.jp/">http://www.keihin-shin.jp/</a>                     |                    | ○                  | 内科                    | 今井 保                                     |                                              |
| 812 | 糞谷こどもクリニック                | 144-0034 | 東京都大田区西糞谷4-29-16<br>ステーションツインタワーズ糞谷フロントウエスト1階 | 03-3745-668  | <a href="http://www.koujiya-kodomo.com">http://www.koujiya-kodomo.com</a>               | ○                  | ○                  | 小児科                   | 高木 優樹                                    | 東邦大学医療センター大森病院（東京都大田区大森西6丁目11-1）             |
| 813 | 眞田クリニック                   | 146-0082 | 東京都大田区池上4-30-3                                | 03-3755-1661 | <a href="http://www.shinkeikai.com/">http://www.shinkeikai.com/</a>                     |                    | ○                  | 脳神経外科<br>循環器科<br>形成外科 | 眞田 祥一<br>池内 聡<br>荒川 秀樹<br>安部 開人<br>栗原 邦広 |                                              |
| 814 | 山王耳鼻咽喉科                   | 143-0023 | 東京都大田区山王2-1-7 神輿大森ビル2階                        | 03-5743-3300 | <a href="https://sanno-ent-clinic.qwc.jp/">https://sanno-ent-clinic.qwc.jp/</a>         | ○                  | ○                  | 耳鼻咽喉科                 | 緒方 哲郎                                    |                                              |
| 815 | 社会医療法人財団仁医会<br>牧田総合病院蒲田分院 | 144-0051 | 東京都大田区西蒲田4丁目2番1号                              | 03-5748-5020 | <a href="http://www.makita-hosp.or.jp/kamata/">http://www.makita-hosp.or.jp/kamata/</a> |                    | ○                  | 内科                    | 越村 勲<br>秋山 敏夫                            | 社会医療法人財団仁医会牧田総合病院（東京都大田区大森北1丁目34番6号）         |
| 816 | すずきこどもクリニック               | 145-0073 | 東京都大田区北嶺町12-5-1F                              | 03-5754-5800 | <a href="http://suzuki-kids.jp/index.html">http://suzuki-kids.jp/index.html</a>         |                    | ○                  | 小児科                   | 鈴木 竜洋                                    |                                              |
| 817 | 鈴木クリニック                   | 143-0015 | 東京都大田区大森西5-25-11                              | 03-3765-9400 |                                                                                         |                    | ○                  | 内科<br>小児科             | 鈴木 和郎                                    | 東邦大学医療センター大森病院（東京都大田区大森西6-11-1）              |
| 818 | 鈴木内科医院                    | 143-0023 | 東京都大田区山王3-29-1                                | 03-3772-1853 | <a href="http://www.otaku-suzuki-naika.com/">www.otaku-suzuki-naika.com/</a>            | ○                  | ○                  | 内科 老年内科<br>消化器内科      | 鈴木 央                                     |                                              |
| 819 | せせらぎクリニック多摩川              | 145-0071 | 東京都大田区田園調布1-33-3 田園ホームズ1階                     | 03-5755-5207 | <a href="https://familymed.seseragic.com">https://familymed.seseragic.com</a>           |                    | ○                  | 内科<br>小児科<br>皮膚科      | 富塚 太郎                                    |                                              |

電話や情報通信機器を用いて診療を実施する医療機関の一覧（東京都）

|     | 基本情報         |          |                          |              |                               | 事務連絡に基づく対応について         |                                         |                                                                                          |                                                                                                                                        |                                              |
|-----|--------------|----------|--------------------------|--------------|-------------------------------|------------------------|-----------------------------------------|------------------------------------------------------------------------------------------|----------------------------------------------------------------------------------------------------------------------------------------|----------------------------------------------|
|     | 施設名          | 郵便番号     | 住所（都道府県から記載）             | 電話番号         | ウェブサイトURL                     | 初診の電話等を用いた診療の実施の有無     | 再診の電話等を用いた診療の実施の有無                      | 対応診療科                                                                                    | 担当医師名                                                                                                                                  | 対面診療が必要と判断した場合に連携する医療機関名（複数ある場合は複数、住所も併せて記載） |
| 820 | 染川医院         | 146-0085 | 東京都大田区久が原5-11-10         | 03-3751-7254 | http://www.somekawa-iin.com/  |                        | ○                                       | 内科<br>心療内科 老年<br>精神科                                                                     | 染川実香                                                                                                                                   |                                              |
| 821 | 高野病院         | 144-0033 | 東京都大田区東糀谷3-3-24          | 03-3741-0011 | http://www.takanohosp.jp      | ○<br>当院に受診歴のある患者に対してのみ | ○                                       | 内科 外科<br>整形外科<br>皮膚科 眼科                                                                  | 高野 研一郎<br>高野 恭子<br>高野 明枝                                                                                                               |                                              |
| 822 | たけうち皮膚科クリニック | 144-0094 | 東京都大田区蒲田4-10-14 あすとウィズ3階 | 03-3734-1655 | http://www.takeuchiderm.jp/   |                        | ○<br>診察したことのない症状や疾病は、視診と触診のできない電話再診の対象外 | 皮膚科                                                                                      | 竹内常道                                                                                                                                   |                                              |
| 823 | 竹内内科小児科医院    | 145-0072 | 東京都大田区田園調布本町40-12-201    | 03-3721-5222 | https://www.takeuchi-iin.jp/  | ○                      | ○                                       | 内科 小児科 糖<br>尿病内科 アレ<br>ルギー科 皮膚<br>科                                                      | 五藤 良将                                                                                                                                  |                                              |
| 824 | 立石医院         | 145-0073 | 東京都大田区北嶺町3-2-7           | 03-3720-3404 | http://www.tateishi-iin.jp    |                        | ○                                       | 内科                                                                                       | 立石 淳一                                                                                                                                  |                                              |
| 825 | つぼた内科眼科クリニック | 144-0055 | 東京都大田区仲六郷2-44-15         | 03-3731-7772 | https://tsubota.clinic/       | ○                      | ○                                       | 内科<br>眼科                                                                                 | 坪田 貴也<br>坪田 恵美                                                                                                                         | 東京蒲田医療センター（東京都大田区南蒲田2-19-2）                  |
| 826 | 田園調布長田整形外科   | 145-0071 | 東京都大田区田園調布2-41-2NTTビル1階  | 03-5483-7070 | http://www.osada-seikei.com/  |                        | ○                                       | 整形外科内科リ<br>ハビリテーショ<br>ン科                                                                 | 長田夏哉                                                                                                                                   | 東京医療センター、昭和大学病院、ほか                           |
| 827 | 田園調布中央病院     | 145-0071 | 東京都大田区田園調布2-43-1         | 03-3721-7121 | https://denenchofu-hp.jp/     |                        | ○                                       | 全科                                                                                       | 全医師                                                                                                                                    |                                              |
| 828 | 東急株式会社 東急病院  | 145-0062 | 東京都大田区北千束3-27-2          | 03-3718-3331 | http://www.tokyu-hospital.jp/ |                        | ○                                       | 内科、消化器・<br>肝臓内科、腎<br>臓・透析内科、<br>糖尿病内科、循<br>環器内科、呼吸<br>器内科、神経内<br>科、心療内科、<br>外科、消化器外<br>科 | 吉田一明、吉田沙佑<br>美、内山威人、小濑正<br>和、田尻進、上田仁<br>美、松平浩、山中修一<br>郎、田中明彦、小川和<br>彦、友安雅子、宇都宮<br>正範、齋藤恵介、加藤<br>大介、筋野甫、高田道<br>哉、梶原幹生、相良博<br>典、木村さくら、伊藤 |                                              |

電話や情報通信機器を用いて診療を実施する医療機関の一覧（東京都）

|     | 基本情報           |          |                             |                               |                                                                                         | 事務連絡に基づく対応について     |                          |                                                          |          |                                                  |
|-----|----------------|----------|-----------------------------|-------------------------------|-----------------------------------------------------------------------------------------|--------------------|--------------------------|----------------------------------------------------------|----------|--------------------------------------------------|
|     | 施設名            | 郵便番号     | 住所（都道府県から記載）                | 電話番号                          | ウェブサイトURL                                                                               | 初診の電話等を用いた診療の実施の有無 | 再診の電話等を用いた診療の実施の有無       | 対応診療科                                                    | 担当医師名    | 対面診療が必要と判断した場合に連携する医療機関名（複数ある場合は複数、住所も併せて記載）     |
| 829 | 東京蒲田病院         | 144-0051 | 東京都大田区西蒲田7-10-1             | 03-3733-0525                  | <a href="https://www.t-kamata-hosp.or.jp/">https://www.t-kamata-hosp.or.jp/</a>         |                    | ○                        | 標榜科全て                                                    |          |                                                  |
| 830 | 東京メモリークリニック蒲田  | 144-0053 | 東京都大田区蒲田本町2-4-2アクシード蒲田本町1階  | 03-6715-7873                  | <a href="https://memory-clinic.jp/">https://memory-clinic.jp/</a>                       |                    | ○                        | 内科<br>神経内科                                               | 園田 康博    |                                                  |
| 831 | 東邦大学医療センター大橋病院 | 153-8515 | 東京都目黒区大橋2-22-36             | 03-3468-1251                  | <a href="https://www.ohashi.med.toho-u.ac.jp/">https://www.ohashi.med.toho-u.ac.jp/</a> |                    | ○<br>処方箋FAX対応<br>(診療未実施) | 全科                                                       | 各診療科担当医師 |                                                  |
| 832 | 東邦大学医療センター大森病院 | 143-8541 | 東京都大田区大森西6-11-1             | 03-3762-4151                  | <a href="https://www.omori.med.toho-u.ac.jp/">https://www.omori.med.toho-u.ac.jp/</a>   |                    | ○<br>処方箋FAX対応<br>(診療未実施) | 泌尿器科、産婦人科、小児科、乳腺外科、皮膚科、呼吸器科、東洋医学科、膠原病科、血液腫瘍科、眼科、整形外科、消化器 | 各診療科担当医師 |                                                  |
| 833 | とちぎクリニック       | 143-0023 | 東京都大田区山王2-19-8              | 03-3777-7712<br>070-7489-2324 | <a href="http://www.tochigiclinic.com">http://www.tochigiclinic.com</a>                 | ○                  | ○                        | 産婦人科                                                     | 栃木 明人    |                                                  |
| 834 | 中馬込おがわ内科       | 143-0027 | 東京都大田区中馬込2-7-10             | 03-6410-7196                  | <a href="https://www.ogawa-naika.net/">https://www.ogawa-naika.net/</a>                 | ○                  | ○                        | 内科<br>小児科                                                | 小川玄洋     |                                                  |
| 835 | 西蒲田整形外科        | 146-0094 | 東京都大田区東矢口3-2-1-108          | 03-3735-2117                  | <a href="https://www.nishikamata.jp">https://www.nishikamata.jp</a>                     |                    | ○                        | 整形外科                                                     | 網野 浩     |                                                  |
| 836 | 西馬込あくつ耳鼻咽喉科    | 143-0025 | 東京都大田区南馬込5-40-1西馬込メディカルビル3階 | 03-6417-1855                  | <a href="https://www.magojibi.jp/">https://www.magojibi.jp/</a>                         | ○                  | ○                        | 耳鼻咽喉科<br>アレルギー科<br>小児科                                   | 阿久津 征利   | 大森赤十字病院（東京都大田区中央4-30-1）<br>荏原病院（東京都大田区東雪谷4-5-10） |
| 837 | 脳外科西馬込クリニック    | 143-0026 | 東京都大田区西馬込2-2-5              | 03-6303-7070                  | <a href="https://nishi-magome.com/">https://nishi-magome.com/</a>                       | ○                  | ○                        | 脳神経外科                                                    | 徳永 仁     |                                                  |

電話や情報通信機器を用いて診療を実施する医療機関の一覧（東京都）

|     | 基本情報         |          |                          |              |                                      | 事務連絡に基づく対応について     |                    |                           |               |                                                                                                               |
|-----|--------------|----------|--------------------------|--------------|--------------------------------------|--------------------|--------------------|---------------------------|---------------|---------------------------------------------------------------------------------------------------------------|
|     | 施設名          | 郵便番号     | 住所（都道府県から記載）             | 電話番号         | ウェブサイトURL                            | 初診の電話等を用いた診療の実施の有無 | 再診の電話等を用いた診療の実施の有無 | 対応診療科                     | 担当医師名         | 対面診療が必要と判断した場合に連携する医療機関名（複数ある場合は複数、住所も併せて記載）                                                                  |
| 838 | 萩中ハートフルクリニック | 1440047  | 東京都大田区萩中1-9-16           | 03-3745-0810 | http://www.haginaka-heart.com        | ○                  | ○                  | 内科                        | 村井 治          |                                                                                                               |
| 839 | 原口小児科クリニック   | 144-0032 | 東京都大田区北糀谷1-11-8 アルトT1F   | 03-3742-1517 | https://www.haraguchi-clinic.com/    |                    | ○                  | 小児科<br>アレルギー科             | 原口 道夫         |                                                                                                               |
| 840 | 東馬込しば整形外科    | 143-0022 | 東京都大田区東馬込東馬込1-19-3       | 03-5718-8811 | http://shiba-seikei.jp/              |                    | ○                  | 整形外科                      | 柴 伸昌          |                                                                                                               |
| 841 | ファミリック診療所    | 146-0092 | 東京都大田区下丸子2-13-4          | 03-5741-3717 | http://www.familic.com               | ○                  | ○                  | 内科・小児科・<br>呼吸器内科          | 山口 久美子        | 東邦大学大森病院                                                                                                      |
| 842 | 藤川クリニック      | 146-0083 | 東京都大田区千鳥3-7-2            | 03-5732-3200 | https://www.fujikawa-cl.jp/          |                    | ○                  | 内科<br>消化器内科<br>肛門外科<br>外科 | 藤川 亨          | 池上総合病院（東京都大田区池上6-1-19）<br>荏原病院（東京都大田区東雪谷4-5-10）<br>大森赤十字病院（東京都大田区中央4-30-1）<br>東邦大学医療センター大森病院（東京都大田区大森西6-11-1） |
| 843 | ふじみクリニック     | 143-0015 | 東京都大田区大森西3-1-38 マチノマ大森3階 | 03-5493-5252 | https://fujimi-ped.jp/               | ○                  | ○                  | 小児科<br>アレルギー科<br>腫瘍内科     | 河本 博<br>村上 直子 |                                                                                                               |
| 844 | 平和島医院        | 143-0016 | 東京都大田区大森北6-14-10         | 03-5753-5050 |                                      | ○                  | ○                  | 内科<br>小児科                 | 森本 幸治         |                                                                                                               |
| 845 | ほりクリニック      | 144-0051 | 東京都大田区西蒲田7-12-6 1階       | 03-3731-3108 | https://www.horiclinic.org/          | ○                  | ○                  | 耳鼻咽喉科                     | 堀 雅明          | 東邦大学医療センター大森病院（〒143-8541 東京都大田区大森西6-11-1）                                                                     |
| 846 | 本田英比古クリニック   | 143-0023 | 東京都大田区山王3-17-11          | 03-5718-0077 | http://www.honda-hidehiko-clinic.com |                    | ○                  | 内科<br>神経内科                | 本田 英比古        |                                                                                                               |

電話や情報通信機器を用いて診療を実施する医療機関の一覧（東京都）

|     | 基本情報          |          |                             |              |                                         | 事務連絡に基づく対応について     |                    |                        |                |                                                                               |
|-----|---------------|----------|-----------------------------|--------------|-----------------------------------------|--------------------|--------------------|------------------------|----------------|-------------------------------------------------------------------------------|
|     | 施設名           | 郵便番号     | 住所（都道府県から記載）                | 電話番号         | ウェブサイトURL                               | 初診の電話等を用いた診療の実施の有無 | 再診の電話等を用いた診療の実施の有無 | 対応診療科                  | 担当医師名          | 対面診療が必要と判断した場合に連携する医療機関名（複数ある場合は複数、住所も併せて記載）                                  |
| 847 | 増田外科          | 144-0053 | 東京都大田区蒲田本町1-4-8             | 03-3732-0877 | http://masuda-geka.jp/                  | ○                  | ○                  | 内科<br>外科<br>皮膚科        | 武田 明芳<br>武田 朋子 | 池上総合病院（大田区池上6-1-19）<br>大森赤十字病院（大田区中央4-30-1）<br>東邦大学大森病院（大田区大森西6-11-1）         |
| 848 | 南馬込おかばやし耳鼻咽喉科 | 143-0025 | 東京都大田区南馬込6-4-23 ファミネス梅田 1F  | 03-6417-1368 | https://www.okabayashi-jibika.com/      | ○                  | ○                  | 耳鼻咽喉科                  | 岡林 大           | 昭和大学病院（東京都品川区旗の台1-5-8）<br>東邦大学医療センター大森病院（東京都大田区大森西6-11-1）                     |
| 849 | みやはら内科外科クリニック | 144-0055 | 東京都大田区仲六郷3-5-2              | 03-6424-9838 |                                         | ○                  | ○                  | 内科<br>外科               | 宮原 正樹          |                                                                               |
| 850 | 夫婦坂クリニック      | 145-0064 | 東京都大田区上池台4丁目21-7 ウエルシア2階    | 03-6421-8755 | https://meotozaka-clinic.com/           | ○                  | ○                  | 内科/アレルギー科/皮膚科/<br>泌尿器科 |                | 昭和大学病院（東京都品川区旗の台1-5-8）<br>荏原病院（東京都大田区東雪谷四丁目5-10）<br>大森赤十字病院（東京都大田区中央4丁目30番1号） |
| 851 | 目蒲病院          | 146-0092 | 東京都大田区下丸子3-23-3             | 03-3759-8888 | http://www.myclinic.ne.jp/mekama/pc/... |                    | ○                  | 内科・整形外科                | 平原・妻鳥          | 対面診療の対応が不可能な場合があります                                                           |
| 852 | 安田整形外科        | 144-0052 | 東京都大田区蒲田4-18-10             | 03-3734-2761 |                                         | ○                  | ○                  | 整形外科                   | 安田 東<br>金井 ゆりか |                                                                               |
| 853 | やすだ内科クリニック    | 145-0065 | 東京都大田区東雪谷2-25-12フローディア雪谷101 | 03-3726-0660 | https://www.yasuda-cl.jp                |                    | ○                  | 内科                     | 安田 大二郎         |                                                                               |
| 854 | 横川医院          | 144-0034 | 東京都大田区西糀谷4-9-24             | 03-3741-5567 |                                         |                    | ○                  | 内科<br>小児科              | 横川 敏男          |                                                                               |
| 855 | ヨコヤマクリニック     | 144-0055 | 東京都大田区仲六郷1-56-10            | 03-3733-4771 | http://www.clinic-yokoyama.jp           |                    | ○                  | 内科<br>眼科               | 横山 真也<br>吉川 典子 |                                                                               |

電話や情報通信機器を用いて診療を実施する医療機関の一覧（東京都）

|     | 基本情報          |          |                                |              |                                                                     | 事務連絡に基づく対応について     |                    |             |                |                                                   |
|-----|---------------|----------|--------------------------------|--------------|---------------------------------------------------------------------|--------------------|--------------------|-------------|----------------|---------------------------------------------------|
|     | 施設名           | 郵便番号     | 住所（都道府県から記載）                   | 電話番号         | ウェブサイトURL                                                           | 初診の電話等を用いた診療の実施の有無 | 再診の電話等を用いた診療の実施の有無 | 対応診療科       | 担当医師名          | 対面診療が必要と判断した場合に連携する医療機関名（複数ある場合は複数、住所も併せて記載）      |
| 856 | 吉田ハートクリニック    | 144-0051 | 東京都大田区西蒲田7-9-3-101             | 03-3731-2302 |                                                                     |                    | ○                  | 循環器内科<br>内科 | 吉田 哲           |                                                   |
| 857 | 若草クリニック       | 146-0095 | 東京都大田区多摩川1-26-21               | 03-3759-6325 |                                                                     | ○                  | ○                  | 内科          | 太田 斉<br>太田 朝子  | 池上総合病院（東京都大田区池上6-1-19）<br>牧田総合病院（東京都大田区大森北1-34-6） |
| 858 | 池上仲通りクリニック    | 146-0082 | 東京都大田区池上3-32-17-1F             | 03-5747-6161 | <a href="http://www.daizem.jp/">http://www.daizem.jp/</a>           | ○                  | ○                  | 内科          | 奈良 大           |                                                   |
| 859 | 蒲田小児科医院       | 144-0052 | 東京都大田区蒲田3-15-18                | 03-3738-7084 |                                                                     | ○                  | ○                  | 小児科         | 高橋 礼子          |                                                   |
| 860 | 山縣医院          | 144-0043 | 東京都大田区羽田1-6-14                 | 03-3741-1981 |                                                                     | ○                  |                    | 内科<br>小児科   | 山縣 法子          |                                                   |
| 861 | 東邦大学羽田空港クリニック | 144-0041 | 東京都大田区羽田空港3-4-2第二ターミナル1階       | 03-6428-8121 |                                                                     |                    | ○                  | 内科          | 靱山 浩一<br>大道 泰子 | 左記施設                                              |
| 862 | 難波メディカルクリニック  | 146-0092 | 東京都大田区下丸子二丁目13番4号 東京サーハウス共同棟1階 | 03-5741-3717 | <a href="https://nanba-medical.com/">https://nanba-medical.com/</a> |                    | ○                  | 内科<br>小児科   | 難波雄亮           | 都立荏原病院                                            |
| 863 | アイリス眼科        | 157-0066 | 東京都世田谷区成城6-16-9 リズリ成城一階        | 03-3483-7373 | <a href="https://www.iris-ganka.jp/">https://www.iris-ganka.jp/</a> |                    | ○                  | 眼科          | 地場 奈実          |                                                   |
| 864 | あきら内科         | 158-0097 | 東京都世田谷区用賀4-3-9                 | 03-3708-6777 |                                                                     |                    | ○                  | 内科          | 佐田 昌           | 関東中央病院（東京都世田谷区上用賀6-25-1）                          |



電話や情報通信機器を用いて診療を実施する医療機関の一覧（東京都）

|     | 基本情報             |          |                             |              |                                    | 事務連絡に基づく対応について     |                    |                                  |                                                                    |                                                                                                                   |
|-----|------------------|----------|-----------------------------|--------------|------------------------------------|--------------------|--------------------|----------------------------------|--------------------------------------------------------------------|-------------------------------------------------------------------------------------------------------------------|
|     | 施設名              | 郵便番号     | 住所（都道府県から記載）                | 電話番号         | ウェブサイトURL                          | 初診の電話等を用いた診療の実施の有無 | 再診の電話等を用いた診療の実施の有無 | 対応診療科                            | 担当医師名                                                              | 対面診療が必要と判断した場合に連携する医療機関名（複数ある場合は複数、住所も併せて記載）                                                                      |
| 865 | 浅香耳鼻咽喉科クリニック     | 158-0093 | 東京都世田谷区上野毛1丁目19-1 メゾン上野毛1F  | 03-3703-8733 | http://asaka-ent.com               | ○                  | ○                  | 耳鼻咽喉科                            | 浅香 大也<br>齋藤 優二<br>横井 佑一郎                                           | 東邦大学医療センター大橋病院（東京都目黒区大橋2-22-36）<br>東京共済病院（東京都目黒区中目黒2-3-8）                                                         |
| 866 | 雨宮内科             | 158-0081 | 東京都世田谷区深沢6-30-13            | 03-3701-5920 |                                    |                    | ○                  | 内科                               | 雨宮                                                                 | 東京医療センター                                                                                                          |
| 867 | アレックス脊椎クリニック     | 158-0082 | 東京都世田谷区等々力4-13-1            | 03-5758-1321 | https://ar-ex.jp/spine             |                    | ○                  | 整形外科                             | 吉原 潔<br>石塚 怜王<br>江口 直                                              |                                                                                                                   |
| 868 | 淡島こどもクリニック       | 155-0032 | 東京都世田谷区代沢5-18-1 代沢カラバッシュ2F  | 03-3422-9751 | http://www.awashima-cl.jp          | ○                  | ○                  | 小児科<br>アレルギー科                    | 武隈 孝治<br>野呂 恵子<br>藤谷 しのぶ                                           |                                                                                                                   |
| 869 | 医療法人社団こしだ内科クリニック | 156-0054 | 東京都世田谷区桜丘2-27-11ワイノKMビル1階   | 03-3425-1771 | mail@koshida-naika.tokyo           | ○                  | ○                  | 内科                               | 越田容子                                                               |                                                                                                                   |
| 870 | 医) 修勇会田崎胃腸科内科    | 158-0081 | 東京都世田谷区深沢6-2-17-1, 2F       | 03-3703-4133 | https://www.tazakiichokanaika.com/ |                    | ○                  | 内科, 胃腸内科,<br>消化器内科, 循環器内科, 呼吸器内科 | 田崎修平                                                               | 玉川病院（東京都世田谷区）<br>関東中央病院（東京都世田谷区）<br>自衛隊中央病院（東京都世田谷区）<br>東京医療センター（東京都目黒区）                                          |
| 871 | AR-Ex尾山台整形外科     | 158-0082 | 東京都世田谷区等々力4-13-1            | 03-5758-3007 | https://ar-ex.jp/oyamadai/         |                    | ○                  | 整形外科                             | 綿貫 誠<br>平田 正純<br>久保 貴敬<br>清水 勇樹<br>大野 達朗<br>森 祐佑<br>内田 宗志<br>平沼 憲治 | 国立病院機構東京医療センター（東京都目黒区東が丘2-5-1）<br>日本医科大学武蔵小杉病院（神奈川県川崎市中原区小杉町1-396）                                                |
| 872 | いなみ内科クリニック       | 154-0024 | 東京都世田谷区三軒茶屋1-13-7 三茶JOYビル2F | 03-3413-1730 | http://inami-naika-clinic.com/     |                    | ○                  | 内科<br>消化器内科<br>肝臓内科              | 稲見 真木子<br>川島 志布子                                                   | 東京医療センター（東京都目黒区東が丘2-5-1）<br>東邦大学医療センター大橋病院（東京都目黒区大橋2-22-36）<br>三宿病院（東京都目黒区上目黒5-33-12）<br>自衛隊中央病院（東京都世田谷区池尻1-2-24） |
| 873 | 五十子クリニック         | 156-0052 | 東京都世田谷区経堂5-3-29             | 03-3426-0220 | https://www.irakoclinic.com        | ○                  | ○                  | 内科                               | 五十子 大雅                                                             |                                                                                                                   |

電話や情報通信機器を用いて診療を実施する医療機関の一覧（東京都）

|     | 基本情報                         |          |                                    |              |                                                                           | 事務連絡に基づく対応について     |                    |                  |                                                              |                                              |
|-----|------------------------------|----------|------------------------------------|--------------|---------------------------------------------------------------------------|--------------------|--------------------|------------------|--------------------------------------------------------------|----------------------------------------------|
|     | 施設名                          | 郵便番号     | 住所（都道府県から記載）                       | 電話番号         | ウェブサイトURL                                                                 | 初診の電話等を用いた診療の実施の有無 | 再診の電話等を用いた診療の実施の有無 | 対応診療科            | 担当医師名                                                        | 対面診療が必要と判断した場合に連携する医療機関名（複数ある場合は複数、住所も併せて記載） |
| 874 | (医) 慈桜会 渡辺クリニック              | 156-0054 | 東京都世田谷区桜丘2-5-23                    | 03-5426-8624 | <a href="https://www.watanabeclin.com">https://www.watanabeclin.com</a>   |                    | ○                  | 内科<br>小児科        | 渡邊 浩                                                         |                                              |
| 875 | 医療法人社団<br>いしかわキッズクリニック       | 154-0017 | 東京都世田谷区世田谷2-6-11                   | 03-5451-3014 | <a href="http://www.ishikawa-kids.com/">http://www.ishikawa-kids.com/</a> | ○                  | ○                  | 小児科              | 石川 央朗                                                        |                                              |
| 876 | 医療法人社団英寿会<br>深沢クリニック         | 154-0016 | 東京都世田谷区弦巻2-39-3                    | 03-3426-8253 | <a href="https://fukazawa-clinic.or.jp">https://fukazawa-clinic.or.jp</a> | ○                  | ○                  | 内科               | 深沢祐之                                                         |                                              |
| 877 | 医療法人社団家族の木<br>給田ファミリークリニック   | 157-0064 | 東京都世田谷区給田3-26-6                    | 03-5315-5511 | <a href="https://kyuden-clinic.com/">https://kyuden-clinic.com/</a>       | ○                  | ○                  | 内科<br>小児科        | 池亀康夫<br>櫻尾明彦                                                 |                                              |
| 878 | 医療法人社団九折会成城<br>木下病院          | 157-0066 | 東京都世田谷区成城6-13-20                   | 03-3482-1799 | <a href="http://www.kinohosp.com/">http://www.kinohosp.com/</a>           | ○                  | ○                  | 婦人科<br>内科<br>小児科 | 木下勝之<br>木下二宣<br>木下智恵<br>鳥巢弘道<br>齋木美恵<br>山ノ井睦<br>山田由季<br>竹本由美 |                                              |
| 879 | 医療法人社団クレッシェン<br>ト つだ小児科クリニック | 154-0017 | 東京都世田谷区世田谷4-5-8<br>アルス世田谷ネクスステージ1F | 03-5477-7736 | <a href="https://www.tsudashonika.com">https://www.tsudashonika.com</a>   | ○                  | ○                  | 小児科              | 津田正彦                                                         |                                              |
| 880 | 医療法人社団慶永会<br>きたみ胃・大腸クリニック    | 156-0067 | 東京都世田谷区喜多見8-18-10 小泉ビル3F           | 03-5494-8411 | <a href="https://kitami-clinic.com">https://kitami-clinic.com</a>         |                    | ○                  | 消化器内科            | 西堀英樹, 高田厚, 渡邊一宏                                              |                                              |
| 881 | 医療法人社団健央会<br>内科クリニック         | 158-0082 | 東京都世田谷区等々力4-9-1                    | 03-6809-8171 | <a href="http://www.ken-cli.jp">http://www.ken-cli.jp</a>                 |                    | ○                  | 内科               | 深井 健一                                                        |                                              |
| 882 | 医療法人社団慈正会<br>副島クリニック         | 155-0032 | 東京都世田谷区代沢5-3-8                     | 03-3421-1793 |                                                                           | ○                  | ○                  | 内科<br>小児科        | 副島 道正                                                        |                                              |

電話や情報通信機器を用いて診療を実施する医療機関の一覧（東京都）

|     | 基本情報                          |              |                                  |              |                                                                                           | 事務連絡に基づく対応について     |                    |                    |                                          |                                                                      |
|-----|-------------------------------|--------------|----------------------------------|--------------|-------------------------------------------------------------------------------------------|--------------------|--------------------|--------------------|------------------------------------------|----------------------------------------------------------------------|
|     | 施設名                           | 郵便番号         | 住所（都道府県から記載）                     | 電話番号         | ウェブサイトURL                                                                                 | 初診の電話等を用いた診療の実施の有無 | 再診の電話等を用いた診療の実施の有無 | 対応診療科              | 担当医師名                                    | 対面診療が必要と判断した場合に連携する医療機関名（複数ある場合は複数、住所も併せて記載）                         |
| 883 | 医療法人社団周駒会<br>井上外科・内科          | 154-0024     | 東京都世田谷区三軒茶屋2-24-17               | 03-3424-3360 | <a href="https://www.inoue-geka.net">https://www.inoue-geka.net</a>                       | ○                  | ○                  | 内科<br>小児科          | 井上敬一郎                                    | 当院に来院                                                                |
| 884 | 医療法人社団 潤愛会<br>板谷クリニック         | 158-0083     | 東京都世田谷区奥沢2-10-12                 | 03-3723-0655 | <a href="https://www.itaya-cl.jp">https://www.itaya-cl.jp</a>                             |                    | ○                  | 内科                 | 板谷光慶                                     |                                                                      |
| 885 | 医療法人社団翔未会<br>桜新町クリニック         | 154-0016     | 東京都世田谷区桜新町1-7-6                  | 03-5706-4321 | <a href="http://www.shomikai.or.jp/saku/">http://www.shomikai.or.jp/saku/</a>             | ○                  | ○                  | 内科<br>腎臓内科<br>呼吸器科 | 堀切 つぐみ<br>外丸 良                           |                                                                      |
| 886 | 医療法人社団頌和会<br>村田医院             | 154-0021     | 東京都世田谷区豪徳寺2-16-25                | 03-3425-2612 | <a href="http://murata-clinic.net">murata-clinic.net</a>                                  | ○                  | ○                  | 内科<br>小児科          | 村田昌隆                                     |                                                                      |
| 887 | 医療法人社団 白木会<br>木下皮膚科           | 03-3718-9907 | 東京都世田谷区奥沢5-20-1                  | 03-3718-9907 | <a href="http://www.kinoshita-clinic.com">http://www.kinoshita-clinic.com</a>             |                    | ○                  | 皮膚科<br>アレルギー科      | 木下 三和子                                   |                                                                      |
| 888 | 医療法人社団仁利会こう<br>らクリニック         | 154-0021     | 東京都世田谷区豪徳寺1-23-22                | 03-3425-2333 | <a href="https://www.koura-clinic.com">https://www.koura-clinic.com</a>                   | ○                  | ○                  | 内科                 | 児浦利哉                                     |                                                                      |
| 889 | 医療法人社団誠清会<br>駒沢皮膚科クリニック       | 154-0011     | 東京都世田谷区上馬3-18-11 エルフレア3F         | 03-3413-6600 | <a href="https://komazawahifuka.com/">https://komazawahifuka.com/</a>                     |                    | ○                  | 皮膚科                | 清水 顕                                     |                                                                      |
| 890 | 医療法人社団<br>瀬田診療所               | 158-0093     | 東京都世田谷区上野毛4-24-15                | 03-3700-4369 | <a href="http://seta-med.com/access/index.html">http://seta-med.com/access/index.html</a> | ○                  | ○                  | 内科<br>小児科          | 大橋 美奈子<br>大橋 十也                          | 国立病院機構東京医療センター（東京都目黒区東が丘2-5-1）<br>日産厚生会玉川病院（世田谷区瀬田4-8-1）<br>慈恵医大第三病院 |
| 891 | 医療法人社団創福会<br>ふくろうクリニック等々<br>カ | 153-0082     | 東京都世田谷区等々力3-5-2<br>ヒューリック等々力ビル3階 | 03-5758-3270 | <a href="http://www.296296.jp">http://www.296296.jp</a>                                   | ○                  | ○                  | 内科                 | 山口 潔<br>秋好 沢諭<br>片本 行信<br>橋本 昌也<br>吉田 哲彦 |                                                                      |

電話や情報通信機器を用いて診療を実施する医療機関の一覧（東京都）

|     | 基本情報                            |          |                                 |              |                                 | 事務連絡に基づく対応について     |                    |                                |                                                                   |                                                                                            |
|-----|---------------------------------|----------|---------------------------------|--------------|---------------------------------|--------------------|--------------------|--------------------------------|-------------------------------------------------------------------|--------------------------------------------------------------------------------------------|
|     | 施設名                             | 郵便番号     | 住所（都道府県から記載）                    | 電話番号         | ウェブサイトURL                       | 初診の電話等を用いた診療の実施の有無 | 再診の電話等を用いた診療の実施の有無 | 対応診療科                          | 担当医師名                                                             | 対面診療が必要と判断した場合に連携する医療機関名（複数ある場合は複数、住所も併せて記載）                                               |
| 892 | 医療法人社団宝池会<br>吉川内科医院             | 156-0043 | 東京都世田谷区松原3-28-8                 | 03-3323-0661 | https://yoshikawa.or.jp         |                    | ○                  | 内科                             | 吉川昌男<br>吉川尚男<br>久次米真吾<br>岩崎昌樹                                     |                                                                                            |
| 893 | 医療法人社団治成会<br>シグマクリニック           | 154-0002 | 東京都世田谷区下馬5-41-21                | 0120-978-922 | https://sigma.or.jp/            | ○                  | ○                  | 内科<br>婦人科<br>甲状腺科<br>乳腺科       | 田中 弦<br>伊藤 路奈<br>福成 信博<br>上野 貴史                                   |                                                                                            |
| 894 | 医療法人社団徹友会<br>岸田こどもクリニック         | 154-0001 | 東京都世田谷区池尻3-2-1-2-2F             | 03-6450-9655 | http://www.kishidakodomo.com/   | ○                  | ○                  | 小児科                            | 岸田勝                                                               | 東邦大学医療センター大橋病院<br>(東京都目黒区大橋2-22-36)                                                        |
| 895 | 医療法人社団土筆会<br>桜丘クリニック            | 156-0054 | 東京都世田谷区桜丘5-17-4 直井ビル1F          | 03-5426-2292 | https://sakuragaoka-clinic.com/ | ○                  | ○                  | 内科<br>消化器内科                    | 比嘉 晃二<br>難波 雄亮                                                    | 関東中央病院（東京都世田谷区上用賀6丁目25-1）                                                                  |
| 896 | 医療法人社団なみいろの<br>樹<br>なおこ皮膚科クリニック | 158-0097 | 東京都世田谷区用賀4-9-27 第3福ビル2階         | 03-6805-7484 | http://www.naoko-hifuka.com/    | ○                  | ○                  | 皮膚科<br>内科<br>小児科               | 服部 尚子<br>木村 久美子                                                   |                                                                                            |
| 897 | 医療法人社団のびた<br>みくりキッズクリニック        | 158-0093 | 東京都世田谷区上野毛2-22-14-B棟            | 03-3701-1010 | https://micri.jp/               | ○                  | ○                  | 小児科<br>小児神経科<br>リハビリテー<br>ション科 | 本田<br>岡田<br>大塚                                                    |                                                                                            |
| 898 | 医療法人社団プラタナス<br>桜新町アーバンクリニック     | 154-0014 | 東京都世田谷区新町3-21-1<br>さくらウェルガーデン2F | 03-3429-1192 | http://www.sakura-urban.jp      | ○                  | ○                  | 内科<br>婦人科<br>心療内科              | 田中 啓広<br>勝又 聡彦<br>圓井 佐江子<br>野澤 詠子                                 | 関東中央病院（東京都世田谷区上用賀6-25-1）<br>玉川病院（東京都世田谷区瀬田4丁目8-1）<br>用賀アーバンクリニック（東京都世田谷区用賀2-41-17<br>1F2F） |
| 899 | 医療法人社団プラタナス<br>松原アーバンクリニック      | 156-0043 | 東京都世田谷区松原5-3-4-6                | 03-5355-3388 | https://matsubara-urban.jp/     | ○                  | ○                  | 内科<br>消化器内科                    | 梅田耕名<br>小澤 政成<br>山崎 励至<br>橋高 恵<br>佐伯 知行<br>白濱 淳<br>舟楯 晋吾<br>石川 祐輔 | 用賀アーバンクリニック<br>桜新町アーバンクリニック                                                                |
| 900 | 医療法人社団プラタナス<br>用賀アーバンクリニック      | 158-0097 | 東京都世田谷区用賀2-41-17 1F2F           | 03-5717-6331 | https://yoga-urban.jp/          | ○                  | ○                  | 内科<br>小児科                      | 野間口 聡<br>田中 勝巳<br>大石 大輔                                           | 関東中央病院（東京都世田谷区上用賀6-25-1）<br>玉川病院（東京都世田谷区瀬田4丁目8-1）<br>桜新町アーバンクリニック（東京都世田谷区新町3-21-1<br>2F）   |

電話や情報通信機器を用いて診療を実施する医療機関の一覧（東京都）

|     | 基本情報                                |          |                            |              |                                     | 事務連絡に基づく対応について     |                    |                   |                |                                                                           |
|-----|-------------------------------------|----------|----------------------------|--------------|-------------------------------------|--------------------|--------------------|-------------------|----------------|---------------------------------------------------------------------------|
|     | 施設名                                 | 郵便番号     | 住所（都道府県から記載）               | 電話番号         | ウェブサイトURL                           | 初診の電話等を用いた診療の実施の有無 | 再診の電話等を用いた診療の実施の有無 | 対応診療科             | 担当医師名          | 対面診療が必要と判断した場合に連携する医療機関名（複数ある場合は複数、住所も併せて記載）                              |
| 901 | 医療法人社団恵会<br>二宮こどもクリニック              | 158-0097 | 東京都世田谷区用賀4-12-15ビバーチェAB号   | 03-3709-1300 | ninomiya-clinic.jp/                 |                    | ○                  | 内科<br>小児科         | 二宮 淳一<br>二宮 恵子 |                                                                           |
| 902 | 医療法人社団ラルゴ さ<br>とう内科・脳神経クリ<br>ニック    | 158-0083 | 東京都世田谷区奥沢2-4-10            | 03-5726-9995 | satoh-nc.jp                         | ○                  | ○                  | 内科<br>小児科<br>神経内科 | 佐藤 博紀<br>佐藤佳渚子 | 奥沢病院（東京都世田谷区奥沢2-11-11）<br>昭和大学病院（東京都品川区旗の台1-5-8）<br>荏原病院（東京都大田区東雪谷4-5-10） |
| 903 | 医療法人社団琉音会<br>用賀耳鼻咽喉科                | 158-0097 | 東京都世田谷区用賀2-36-8-105        | 03-5491-5253 | http://ssc.doctorqube.com/ryuonkai/ | ○                  | ○                  | 耳鼻咽喉科             | 高橋 幸太郎         |                                                                           |
| 904 | 医療法人社団リバイブ吉<br>野クリニック               | 157-0062 | 東京都世田谷区南烏山5-1-15ヒエトビル102   | 03-5315-7170 |                                     | ○                  | ○                  | 内科                | 吉野 博子          |                                                                           |
| 905 | 医療法人社団 le bois<br>あんどファミリークリ<br>ニック | 157-0073 | 東京都世田谷区砧8-21-8 シェーンハイト1F2F | 03-5727-5500 | http://www.andyman.jp               | ○                  | ○                  | 内科<br>小児科         | 安藤 秀彦          |                                                                           |
| 906 | 上杉医院                                | 158-0091 | 東京都世田谷区中町1-19-19           | 03-5706-0777 | www.u-clinic.min.gr.jp              |                    | ○                  | 内科<br>小児科         | 上杉 秀永          |                                                                           |
| 907 | うたクリニック<br>内科消化器内科                  | 158-0093 | 東京都世田谷区上野毛1-30-22          | 03-6382-8111 | http://uta-clinic.com/              | ○                  | ○                  | 内科<br>消化器内科       | 宇多 慶記          | 玉川病院（東京都世田谷区瀬田4-8-1）<br>東京医療センター（東京都目黒区東が丘2-5-1）                          |
| 908 | オークラ小児科                             | 158-0082 | 東京都世田谷区等々力2-33-11          | 03-3701-5360 |                                     | ○                  | ○                  | 小児科               | 大倉節子           | 東京医療センター（東京都目黒区東が丘2-5-1）<br>国立成育医療センター（東京都世田谷区大蔵2丁目10-1）                  |
| 909 | 岡崎内科クリニック                           | 158-0081 | 東京都世田谷区深沢5-36-18           | 03-5758-3680 |                                     | ○                  | ○                  | 内科                | 岡崎 怜子          | 東京医療センター（東京都目黒区東が丘2-5-1）                                                  |

電話や情報通信機器を用いて診療を実施する医療機関の一覧（東京都）

|     | 基本情報          |          |                            |              |                                    | 事務連絡に基づく対応について     |                    |                       |                |                                                    |
|-----|---------------|----------|----------------------------|--------------|------------------------------------|--------------------|--------------------|-----------------------|----------------|----------------------------------------------------|
|     | 施設名           | 郵便番号     | 住所（都道府県から記載）               | 電話番号         | ウェブサイトURL                          | 初診の電話等を用いた診療の実施の有無 | 再診の電話等を用いた診療の実施の有無 | 対応診療科                 | 担当医師名          | 対面診療が必要と判断した場合に連携する医療機関名（複数ある場合は複数、住所も併せて記載）       |
| 910 | おくさわキッズクリニック  | 158-0083 | 東京都世田谷区奥沢3-3-0-17-1F       | 03-6425-4970 | http://hwm6.gyao.ne.jp/okc330171f/ | ○                  | ○                  | 小児科<br>アレルギー科         | 藤井芳実           |                                                    |
| 911 | 尾山台かばやま小児科    | 158-0082 | 東京都世田谷区等々力4-1-15-2F        | 03-5758-1147 |                                    | ○                  | ○                  | 小児科                   | 榊山 浩彦          | 国立成育医療センター（東京都世田谷区大蔵2丁目10-1）                       |
| 912 | 尾山台ゆあさ内科クリニック | 158-0082 | 東京都世田谷区等々力5-5-12-2階        | 03-3704-1024 | http://yuasa-clinic.jp             |                    | ○                  | 内科                    | 湯浅 幸子<br>湯浅 慎介 |                                                    |
| 913 | かどた内科クリニック    | 155-0032 | 東京都世田谷区代沢5-18-1-2F         | 03-6413-8333 | https://kad-cl.com/                |                    | ○                  | 内科<br>呼吸器内科<br>アレルギー科 | 門田 篤           |                                                    |
| 914 | 上野毛眼科         | 158-0093 | 東京都世田谷区上野毛3-4-17           | 03-5752-4111 |                                    |                    | ○                  | 眼科                    | 鎌田絵里子<br>鎌田裕子  |                                                    |
| 915 | うすだ内科クリニック    | 156-0043 | 東京都世田谷松原2-29-1 ブランテラス松原201 | 03-3323-7707 | https://usuda-naika.com            | ○                  | ○                  | 内科<br>脳神経内科           | 臼田 和弘          |                                                    |
| 916 | 上祖師谷かたらいクリニック | 157-0065 | 東京都世田谷区上祖師谷6-7-28 かたらいビル1階 | 03-3300-6006 | http://www.katarai-clinic.jp       | ○                  | ○                  | 内科                    | 鈴木 淳           |                                                    |
| 917 | 唐沢内科医院        | 158-0081 | 東京都世田谷区深沢1-18-9 1F         | 03-3701-7552 | http://www.karasawanaika.jp        | ○                  | ○                  | 内科<br>小児科             | 唐澤 達信          | 国立病院機構東京医療センター（東京都目黒区東が丘2-5-1）                     |
| 918 | かるがもクリニック     | 156-0054 | 東京都世田谷区桜丘2-25-4            | 03-5426-2220 | https://www.karugamo-cl.jp/        | ○                  | ○                  | 小児科・内科                | 宮原 篤           | 関東中央病院（東京都世田谷区上用賀6-25-1）・成育医療センター（東京都世田谷区大蔵2-10-1） |

電話や情報通信機器を用いて診療を実施する医療機関の一覧（東京都）

|     | 基本情報         |          |                           |              |                                                                                                                                                   | 事務連絡に基づく対応について     |                    |       |         |                                                                                                                                                                                           |
|-----|--------------|----------|---------------------------|--------------|---------------------------------------------------------------------------------------------------------------------------------------------------|--------------------|--------------------|-------|---------|-------------------------------------------------------------------------------------------------------------------------------------------------------------------------------------------|
|     | 施設名          | 郵便番号     | 住所（都道府県から記載）              | 電話番号         | ウェブサイトURL                                                                                                                                         | 初診の電話等を用いた診療の実施の有無 | 再診の電話等を用いた診療の実施の有無 | 対応診療科 | 担当医師名   | 対面診療が必要と判断した場合に連携する医療機関名（複数ある場合は複数、住所も併せて記載）                                                                                                                                              |
| 919 | 河崎内科クリニック    | 158-0081 | 東京都世田谷区深沢2-13-21          | 03-5707-9520 | <a href="http://www.newton-doctor.com/doctor/tokyo14/fukasawakawasaki/s01/">http://www.newton-doctor.com/doctor/tokyo14/fukasawakawasaki/s01/</a> | ○                  | ○                  | 内科    | 河崎恒久    | 東京医療センター（東京都目黒区東が丘2-5-1）<br>関東中央病院（東京都世田谷区上用賀6-25-1）<br>奥沢病院（東京都世田谷区奥沢2-11-11）<br>駒沢病院（東京都世田谷区駒沢2-2-15）<br>田園調布中央病院（東京都大田区田園調布2-43-1）<br>日赤医療センター（東京都渋谷区広尾4-1-22）<br>玉川病院（東京都世田谷区瀬田4-8-1） |
| 920 | かわまたこどもクリニック | 156-0042 | 東京都世田谷区羽根木2-40-23-1F      | 03-3321-3077 | <a href="http://www.kawamata-kodomo.com">http://www.kawamata-kodomo.com</a>                                                                       | ○                  | ○                  | 小児科   | 川真田 光   |                                                                                                                                                                                           |
| 921 | 喜多見こどもクリニック  | 157-0067 | 東京都世田谷区喜多見8-19-15 森田ビル2階  | 03-5727-1033 | <a href="http://www.57271033.com/i/">http://www.57271033.com/i/</a>                                                                               |                    | ○                  | 小児科   | 上田 哲    |                                                                                                                                                                                           |
| 922 | 喜多見やの耳鼻科     | 157-0067 | 東京都世田谷区喜多見8丁目18-12        | 03-6411-0322 | <a href="http://kitamiyanojibika.com/">http://kitamiyanojibika.com/</a>                                                                           | ○                  | ○                  | 耳鼻咽喉科 | 矢野 裕之   | 多摩病院<br>慈恵医大第三病院                                                                                                                                                                          |
| 923 | 樹のはなクリニック    | 154-0004 | 東京都世田谷区太子堂2-26-2 サルス太子橋1階 | 03-5433-3388 | <a href="http://kinohana-clinic.com">kinohana-clinic.com</a>                                                                                      | ○                  | ○                  | 内科    | 奈良岡 美恵子 | 東邦大学医療センター大橋病院・関東中央病院                                                                                                                                                                     |
| 924 | 経堂こうづき眼科     | 156-0063 | 東京都世田谷区経堂2丁目1-33 経堂コルティ2F | 03-5799-7276 | <a href="https://www.kozuki-eyeclinic.com/">https://www.kozuki-eyeclinic.com/</a>                                                                 | ○                  | ○                  | 眼科    | 上月 直之   |                                                                                                                                                                                           |
| 925 | 経堂3丁目クリニック   | 156-0052 | 東京都世田谷区経堂3-20-22          | 03-5799-7027 | <a href="http://houmonshinryou.com/">http://houmonshinryou.com/</a>                                                                               |                    | ○                  | 内科    | 日吉 晴久   |                                                                                                                                                                                           |
| 926 | 榊クリニック       | 154-0016 | 東京都世田谷区弦巻4-2-18 1F        | 03-5451-7211 |                                                                                                                                                   |                    | ○                  | 内科    | 榊 恵     |                                                                                                                                                                                           |
| 927 | くろさか皮膚科クリニック | 158-0083 | 東京都世田谷区等々力6-2-1           | 03-5758-6789 | <a href="http://www.kurosaka-clinic.com/">http://www.kurosaka-clinic.com/</a>                                                                     |                    | ○                  | 皮膚科   | 黒坂 良枝   |                                                                                                                                                                                           |

電話や情報通信機器を用いて診療を実施する医療機関の一覧（東京都）

|     | 基本情報        |          |                             |              |                                                                                       | 事務連絡に基づく対応について     |                    |                     |                                  |                                                             |
|-----|-------------|----------|-----------------------------|--------------|---------------------------------------------------------------------------------------|--------------------|--------------------|---------------------|----------------------------------|-------------------------------------------------------------|
|     | 施設名         | 郵便番号     | 住所（都道府県から記載）                | 電話番号         | ウェブサイトURL                                                                             | 初診の電話等を用いた診療の実施の有無 | 再診の電話等を用いた診療の実施の有無 | 対応診療科               | 担当医師名                            | 対面診療が必要と判断した場合に連携する医療機関名（複数ある場合は複数、住所も併せて記載）                |
| 928 | こころの診療所三軒茶屋 | 154-0024 | 東京都世田谷区三軒茶屋1-38-8 3階        | 03-6805-5510 | <a href="https://kokoro-sancha.com/">https://kokoro-sancha.com/</a>                   | ○                  | ○                  | 心療内科<br>精神科         | 北條 彩                             |                                                             |
| 929 | こじま内科呼吸器科   | 158-0083 | 東京都世田谷区奥沢2丁目38番9 自由が丘月瀬ビル3階 | 03-3725-1159 | <a href="http://kojimanaika.tokyo/index.html">http://kojimanaika.tokyo/index.html</a> |                    | ○                  | 内科<br>呼吸器内科         | 小島 薫                             |                                                             |
| 930 | こだいら泌尿器科    | 154-0003 | 東京都世田谷区野沢3-2-8-101          | 03-3410-2373 | <a href="http://www.kodairourology.jp">www.kodairourology.jp</a>                      | ○                  | ○                  | 泌尿器科                | 古平 喜一郎                           | 東京医療センター（東京都目黒区東が丘2-5-1）                                    |
| 931 | 駒沢風の診療所     | 154-0011 | 東京都世田谷区上馬4-4-10             | 03-5712-0012 |                                                                                       | ○                  | ○                  | 内科<br>消化器科<br>リウマチ科 | 斉藤 栄造<br>菊池 真大<br>中里 真宏<br>菊池 美穂 |                                                             |
| 932 | 駒沢公園内科クリニック | 154-0012 | 東京都世田谷区駒沢4-1-1ノア駒沢1階        | 03-5779-6603 | <a href="https://kp-clinic.com/">https://kp-clinic.com/</a>                           |                    | ○                  | 内科<br>神経内科<br>消化器内科 | 坂本 剛<br>坂本 夏子                    |                                                             |
| 933 | 小松内科クリニック   | 158-0083 | 東京都世田谷区奥沢5-25-11            | 03-3717-7772 | <a href="http://www.komatsu-naika.com">http://www.komatsu-naika.com</a>               | ○                  | ○                  | 内科<br>小児科           | 小松 英嗣                            |                                                             |
| 934 | さいとうクリニック   | 154-0014 | 東京都世田谷区新町2-35-20            | 03-3425-1200 |                                                                                       |                    | ○                  | 内科                  | 斉藤                               | 玉川病院 世田谷区瀬田4-8-1<br>関東中央病院 世田谷区上用賀6-25-1                    |
| 935 | 斎藤小児科内科医院   | 156-0044 | 東京都世田谷区赤堤1-39-15            | 03-3325-1177 |                                                                                       | ○                  | ○                  | 小児科<br>内科           | 斎藤正敏                             | 関東中央病院（東京都世田谷区）<br>東邦大学医療センター大橋病院（目黒区大橋）<br>柴本内科医院（東京都世田谷区） |
| 936 | 坂谷クリニック     |          | 世田谷区用賀4-10-3 ヒルズII 1F       | 03-5717-2255 |                                                                                       | ○                  | ○                  | 消化器内科<br>内科         | 坂谷 新<br>坂谷 敬子                    |                                                             |



電話や情報通信機器を用いて診療を実施する医療機関の一覧（東京都）

|     | 基本情報            |          |                                   |              |                                                                                                     | 事務連絡に基づく対応について     |                    |                     |               |                                                                    |
|-----|-----------------|----------|-----------------------------------|--------------|-----------------------------------------------------------------------------------------------------|--------------------|--------------------|---------------------|---------------|--------------------------------------------------------------------|
|     | 施設名             | 郵便番号     | 住所（都道府県から記載）                      | 電話番号         | ウェブサイトURL                                                                                           | 初診の電話等を用いた診療の実施の有無 | 再診の電話等を用いた診療の実施の有無 | 対応診療科               | 担当医師名         | 対面診療が必要と判断した場合に連携する医療機関名（複数ある場合は複数、住所も併せて記載）                       |
| 937 | 桜新町こどもクリニック     | 154-0014 | 東京都世田谷区新町3-2-1                    | 03-5450-1515 | <a href="http://www.sakura-kids-clinic.jp/">http://www.sakura-kids-clinic.jp/</a>                   | ○                  | ○                  | 内科、小児科、皮膚科、アレルギー科   | 似鳥 嘉一         | 東邦大学大橋病院（目黒区大橋2-17-6）東京医療センター（目黒区東が丘2-5-1）成育医療研究センター（世田谷区大蔵2-10-1） |
| 938 | さくらキッズくりにつく     | 154-0015 | 東京都世田谷区桜新町2-10-4 ミケア 2F           | 03-5451-0016 | <a href="http://www.sakurakids-clinic.com">http://www.sakurakids-clinic.com</a>                     | ○                  | ○                  | 小児科                 | 藤井 明子         | 国立成育医療研究センター（東京都世田谷区大蔵2丁目10-1）                                     |
| 939 | さくら小児科・内科クリニック  | 156-0053 | 東京都世田谷区桜1-67-8 AKビル1F             | 03-6413-2211 | sakura-kids.com                                                                                     | ○                  | ○                  | 小児科内科               | 立山悟志<br>中島夏樹  | 国立成育医療研究センター 関東中央病院                                                |
| 940 | 佐藤診療所           | 158-0077 | 東京都世田谷区用賀2-35-4                   | 03-5491-7745 | <a href="http://www.sato-shinryojo.com">www.sato-shinryojo.com</a>                                  | ○                  | ○                  | 内科<br>小児科           | 佐藤 周三         | 東京医療センター（東京都目黒区東が丘2-5-1）                                           |
| 941 | 三軒茶屋駅前おなかクリニック  | 154-0024 | 東京都世田谷区三軒茶屋1-37-2 三茶ビル4階          | 03-3421-7149 | <a href="https://sancha-cl.com">https://sancha-cl.com</a>                                           | ○                  | ○                  | 内科 消化器内科<br>内視鏡内科   | 三谷 年史         |                                                                    |
| 942 | 三軒茶屋駅前メンタルクリニック | 154-0024 | 東京都世田谷区三軒茶屋1-37-8 ワコーレ三軒茶屋64ビル5階A | 03-6804-0126 | <a href="http://www.sancha-mental.com">http://www.sancha-mental.com</a>                             | ○                  | ○                  | 精神科<br>心療内科         | 服部 栄治         |                                                                    |
| 943 | SANCHAこころのクリニック | 154-0004 | 東京都世田谷区太子堂2-14-3シャルムイシクラ4F        | 03-5431-0258 | <a href="https://sanchakokoro.com/">https://sanchakokoro.com/</a>                                   | ○                  | ○                  | 精神科<br>心療内科         | 西脇 一郎         |                                                                    |
| 944 | 自衛隊中央病院         | 154-8532 | 東京都世田谷区池尻1-2-24                   | 03-3411-0151 | <a href="http://www.mod.go.jp/gsd/chos/p/index.html">http://www.mod.go.jp/gsd/chos/p/index.html</a> |                    | ○                  | 精神科、病理診断科、救急科を除く診療科 | 左記診療科を除く全ての医師 |                                                                    |
| 945 | 志賀医院            | 155-0031 | 東京都世田谷区北沢2-29-16                  | 03-3460-3552 |                                                                                                     | ○                  | ○                  | 内科<br>小児科           | 志賀 幸雄         | 東邦大学医療センター大橋病院（東京都目黒区大橋2-17-6）                                     |

電話や情報通信機器を用いて診療を実施する医療機関の一覧（東京都）

|     | 基本情報           |          |                                |              |                                                                                       | 事務連絡に基づく対応について     |                    |                  |                                         |                                                                             |
|-----|----------------|----------|--------------------------------|--------------|---------------------------------------------------------------------------------------|--------------------|--------------------|------------------|-----------------------------------------|-----------------------------------------------------------------------------|
|     | 施設名            | 郵便番号     | 住所（都道府県から記載）                   | 電話番号         | ウェブサイトURL                                                                             | 初診の電話等を用いた診療の実施の有無 | 再診の電話等を用いた診療の実施の有無 | 対応診療科            | 担当医師名                                   | 対面診療が必要と判断した場合に連携する医療機関名（複数ある場合は複数、住所も併せて記載）                                |
| 946 | 耳鼻咽喉科弘重クリニック   | 157-0067 | 東京都世田谷区喜多見8-19-14 喜多見フォーラム2-4階 | 03-5494-6565 |                                                                                       | ○                  | ○                  | 耳鼻科              | 弘重 光一<br>弘重 哉子                          | 東京慈恵会医大第三病院（東京都狛江市和泉本町4-11-1） 関東中央病院（東京都世田谷区上用賀6-25-1）                      |
| 947 | 自由が丘南口クリニック    | 158-0083 | 東京都世田谷区奥沢6-21-11               | 03-3718-7429 |                                                                                       |                    | ○                  | 内科<br>皮膚科        | 稲本元<br>稲本伸子                             | 慶應義塾大学病院<br>独立行政法人国立病院機構東京医療センター<br>北里大学北里研究所病院                             |
| 948 | 清水小児科医院        | 154-0011 | 東京都世田谷区上馬4-27-7                | 03-3421-5696 |                                                                                       | ○                  | ○                  | 内科<br>小児科        | 清水 寛子<br>清水 千鶴<br>清水 浩信                 | 独立行政法人国立病院機構東京医療センター（東京都目黒区東が丘2-5-1）<br>独立行政法人国立成育医療研究センター（東京都世田谷区大蔵2-10-1） |
| 949 | シモキタクリニック      | 155-0031 | 東京都世田谷区北沢2-17-2                | 03-3414-5252 | <a href="http://shimokita-clinic.com/">http://shimokita-clinic.com/</a>               |                    | ○                  | 内科               | 渡邊 友美                                   |                                                                             |
| 950 | 下田クリニック        | 158-0082 | 東京都世田谷区等々力3-10-3-201           | 03-6411-6937 |                                                                                       | ○                  | ○                  | 内科               | 下田泰彦                                    | 玉川病院（世田谷区瀬田4-8-1）                                                           |
| 951 | 自由が丘ファミリー皮ふ科   | 158-0083 | 東京都世田谷区奥沢5-23-18メディス自由が丘4階     | 03-6421-3412 | <a href="http://jiyugaoka-family-hifuka.com/">http://jiyugaoka-family-hifuka.com/</a> | ○                  | ○                  | 皮膚科              | 玉城有紀                                    | 近隣のクリニック                                                                    |
| 952 | せきぐちクリニック      | 156-0055 | 東京都世田谷区船橋1-16-1                | 03-3429-4181 | <a href="https://www.sekiguchi-clinic.net">https://www.sekiguchi-clinic.net</a>       | ○                  | ○                  | 内科<br>小児科<br>婦人科 | 関口 茂                                    |                                                                             |
| 953 | せたがや上町脳神経クリニック | 154-0012 | 東京都世田谷区世田谷2-4-2-4F             | 03-5477-2020 | <a href="https://setagayakamimachineuro.com/">https://setagayakamimachineuro.com/</a> |                    | ○                  | 脳神経外科            | 高見 昌明                                   |                                                                             |
| 954 | 世田谷記念病院        | 158-0092 | 東京都世田谷区野毛2丁目30-10              | 03-3703-5100 | <a href="http://www.setagayahp.jp/">http://www.setagayahp.jp/</a>                     | ○                  | ○                  | 脳神経外科<br>内科      | 脳外：村上 秀喜<br>内科：木村 加奈子、志村 陽子、前田 朝美、横室 浩樹 |                                                                             |

電話や情報通信機器を用いて診療を実施する医療機関の一覧（東京都）

|     | 基本情報            |          |                               |              |                                                                                                               | 事務連絡に基づく対応について     |                    |                                                                         |                             |                                              |
|-----|-----------------|----------|-------------------------------|--------------|---------------------------------------------------------------------------------------------------------------|--------------------|--------------------|-------------------------------------------------------------------------|-----------------------------|----------------------------------------------|
|     | 施設名             | 郵便番号     | 住所（都道府県から記載）                  | 電話番号         | ウェブサイトURL                                                                                                     | 初診の電話等を用いた診療の実施の有無 | 再診の電話等を用いた診療の実施の有無 | 対応診療科                                                                   | 担当医師名                       | 対面診療が必要と判断した場合に連携する医療機関名（複数ある場合は複数、住所も併せて記載） |
| 955 | 世田谷子どもクリニック     | 154-0017 | 東京都世田谷区世田谷3-6-14-101          | 03-5799-1582 | <a href="https://www.setagayakodomo-clinic.com">https://www.setagayakodomo-clinic.com</a>                     | ○                  | ○                  | 小児科                                                                     | 副田敦裕                        |                                              |
| 956 | 世田谷下田総合病院       | 157-0062 | 東京都世田谷区南烏山4-9-23              | 03-3308-5221 | <a href="http://www.shimodabyouin.jp/">http://www.shimodabyouin.jp/</a>                                       | ○                  | ○                  | 内科<br>整形外科                                                              | 下田重人<br>平田剛士<br>中川雅之<br>原田遼 |                                              |
| 957 | 世田谷中央病院         | 154-0017 | 東京都世田谷区世田谷1-32-18             | 03-3420-7111 | <a href="http://www.setagaya-hp.or.jp">http://www.setagaya-hp.or.jp</a>                                       |                    | ○                  | 内科<br>整形外科<br>外科                                                        | 米満 祐一<br>小林 俊行<br>吉野 正晃     |                                              |
| 958 | せたがや内科・消化器クリニック | 154-0015 | 東京都世田谷区桜新町1-40-8桜新町クリニックモール3階 | 03-3428-1107 | <a href="https://tokyo-onaka.com">https://tokyo-onaka.com</a>                                                 | ○                  | ○                  | 内科                                                                      | 富沢賢治                        | 虎の門病院（東京都） 虎の門病院分院（神奈川県）                     |
| 959 | せたがや泌尿器腎クリニック   | 154-0015 | 東京都世田谷区桜新町1-40-8桜新町クリニックモール2F | 03-3425-1124 | <a href="http://setagaya-uro.jp">setagaya-uro.jp</a>                                                          |                    | ○                  | 泌尿器科<br>内科                                                              | 中村圭輔                        | 関東中央病院（東京都世田谷区上用賀6-25-1）                     |
| 960 | 世田谷リウマチ膠原病クリニック | 156-0052 | 東京都世田谷区経堂2-4-6                | 03-6413-4666 | <a href="http://www.setagayariumachi.com">http://www.setagayariumachi.com</a>                                 |                    | ○                  | リウマチ科                                                                   | 吉田智彦<br>勝山直興<br>秋山陽一郎       |                                              |
| 961 | たけおクリニック        | 154-0004 | 東京都世田谷区太子堂4-22-7 森住ビル3階       | 03-5433-3256 | <a href="https://www.takeo-clinic.com/">https://www.takeo-clinic.com/</a>                                     | ○                  | ○                  | 内科                                                                      | 竹尾浩紀<br>田中沙代子<br>塚崇         | 自衛隊中央病院（東京都世田谷区池尻1-2-24）                     |
| 962 | テツダ耳鼻咽喉科        | 158-0081 | 東京都世田谷区深沢5-23-19 1階           | 03-5760-3550 | <a href="https://www.tetsudaent.com/">https://www.tetsudaent.com/</a>                                         | ○                  | ○                  | 耳鼻咽喉科                                                                   | 鐵田 晃久                       |                                              |
| 963 | 東京都立松沢病院        | 156-0057 | 東京都世田谷区上北沢2-1-1               | 03-3303-7211 | <a href="https://www.byouin.metro.tokyo.lg.jp/matsuzawa/">https://www.byouin.metro.tokyo.lg.jp/matsuzawa/</a> |                    | ○                  | 精神科、内科、<br>外科、整形外科、<br>形成外科、<br>脳神経外科、リ<br>ハビリテーショ<br>ン科、麻酔科、<br>眼科、歯科等 | 外来各担当医                      | —                                            |

電話や情報通信機器を用いて診療を実施する医療機関の一覧（東京都）

|     | 基本情報              |          |                                 |              |                              | 事務連絡に基づく対応について     |                    |                       |                |                                                                                                                    |
|-----|-------------------|----------|---------------------------------|--------------|------------------------------|--------------------|--------------------|-----------------------|----------------|--------------------------------------------------------------------------------------------------------------------|
|     | 施設名               | 郵便番号     | 住所（都道府県から記載）                    | 電話番号         | ウェブサイトURL                    | 初診の電話等を用いた診療の実施の有無 | 再診の電話等を用いた診療の実施の有無 | 対応診療科                 | 担当医師名          | 対面診療が必要と判断した場合に連携する医療機関名（複数ある場合は複数、住所も併せて記載）                                                                       |
| 964 | 医療法人社団 慶永会 徳永整形外科 | 157-0067 | 東京都世田谷区喜多見8-18-10 小泉ビル2階        | 03-5494-7311 | https://tokunaga.gr.jp       |                    | ○                  | 整形外科                  | 徳永 祐二          |                                                                                                                    |
| 965 | とも内科クリニック         | 154-0015 | 東京都世田谷区桜新町2-10-4ミケアビル2F         | 03-5451-7700 | http://tomo.clinic           | ○                  | ○                  | 内科<br>糖尿病内科           | 加藤 朋子          | 東京医療センター（東京都目黒区東が丘2-5-1）<br>関東中央病院（東京都世田谷区上用賀6-25-1）<br>東邦大学大橋病院（東京都目黒区大橋2-22-36）<br>日産厚生会玉川病院（東京都世田谷区瀬田4-8-1）     |
| 966 | ながたクリニック          | 154-0017 | 東京都世田谷区世田谷4-1-3世田谷医療COMMUNITY3F | 03-5477-1128 | http://www.nagataclinic.net/ | ○                  | ○                  | 内科<br>消化器内科<br>外科     | 永田 博康          |                                                                                                                    |
| 967 | 中野医院              | 1580086  | 東京都世田谷区尾山台3-7-13                | 03-3705-2551 | http://www.nakano-iin.net/   | ○                  | ○                  | 産婦人科<br>内科<br>小児科     | 中野 明           | 玉川病院（世田谷区瀬田4-8-1）<br>関東中央病院（世田谷区上用賀6-25-1）                                                                         |
| 968 | ニコタマ大腸・肛門クリニック    | 158-0094 | 東京都世田谷区玉川3-7-1 新二子玉川ビル1階・2階     | 03-3700-7777 | https://nico-tama.jp         |                    | ○                  | 肛門外科<br>肛門内科<br>消化器内科 | 黒田 敏彦          | 奥沢病院（東京都世田谷区奥沢2丁目11-11）<br>田園調布中央病院（東京都大田区田園調布2丁目43-1）<br>東京医療センター（東京都目黒区東が丘2丁目5-1）<br>東京大学医学部附属病院（東京都文京区本郷7丁目3-1） |
| 969 | 西島内科クリニック         | 1570068  | 東京都世田谷区宇奈根3-1-21                | 354942020    | http://nishijima-clinic.jp   |                    | ○                  | 内科<br>小児科             | 西島敬之郎          |                                                                                                                    |
| 970 | 仁藤医院              | 158-0095 | 東京都世田谷区瀬田4-18-5                 | 03-3700-6216 | https://www.nito-iin.com     |                    | ○                  | 内科<br>皮膚科             | 仁藤 学<br>仁藤 真佐江 |                                                                                                                    |
| 971 | 野沢3丁目内科           | 154-0003 | 東京都世田谷区野沢3-1-16                 | 03-5779-8255 | https://www.nozawa3.jp/      | ○                  | ○                  | 内科                    | 柳川達郎           |                                                                                                                    |
| 972 | パークサイド脳神経外科クリニック  | 154-0004 | 東京都世田谷区太子堂1-3-39B1F             | 03-3414-3300 | https://www.parkside-nsc.com |                    | ○                  | 脳外科<br>神経内科           | 近藤 新           |                                                                                                                    |

電話や情報通信機器を用いて診療を実施する医療機関の一覧（東京都）

|     | 基本情報             |          |                                     |              |                                                                                                     | 事務連絡に基づく対応について     |                    |             |                |                                                       |
|-----|------------------|----------|-------------------------------------|--------------|-----------------------------------------------------------------------------------------------------|--------------------|--------------------|-------------|----------------|-------------------------------------------------------|
|     | 施設名              | 郵便番号     | 住所（都道府県から記載）                        | 電話番号         | ウェブサイトURL                                                                                           | 初診の電話等を用いた診療の実施の有無 | 再診の電話等を用いた診療の実施の有無 | 対応診療科       | 担当医師名          | 対面診療が必要と判断した場合に連携する医療機関名（複数ある場合は複数、住所も併せて記載）          |
| 973 | 浜本眼科内科           | 154-0012 | 東京都世田谷区駒沢4-19-13-201                | 03-5432-6302 | <a href="https://www.hamamoto-eyeclinic.com/">https://www.hamamoto-eyeclinic.com/</a>               |                    | ○                  | 内科          | 濱本真            |                                                       |
| 974 | ひかりクリニック         | 154-0014 | 東京都世田谷区新町3-22-4                     | 03-5426-7888 |                                                                                                     |                    | ○                  | 内科          | 松本 正廣<br>松本 裕子 | 関東中央病院（東京都世田谷区上用賀6-25-1）<br>日産厚生会玉川病院（東京都世田谷区瀬田4-8-1） |
| 975 | ひらくクリニック         | 157-0065 | 東京都世田谷区上祖師谷5-18-9                   | 03-3308-0900 | <a href="http://hiraku-cl.com">http://hiraku-cl.com</a>                                             | ○                  | ○                  | 内科          | 吉田 啓           |                                                       |
| 976 | 平山恵子産婦人科小児科クリニック | 158-0083 | 東京都世田谷区奥沢6-3-7-202B                 | 03-5758-3653 |                                                                                                     | ○                  | ○                  | 小児科<br>産婦人科 | 平山 恵子          | 奥沢病院（東京都世田谷区奥沢2-11-11）                                |
| 977 | ひろみ皮フ科クリニック      | 156-0051 | 東京都世田谷区宮坂2-17-2英月ビル1階               | 03-3420-7468 | <a href="https://hiromi-clinic.jp/">https://hiromi-clinic.jp/</a>                                   | ○                  | ○                  | 皮膚科         | 梅澤裕美           | 関東中央病院（東京都世田谷区上用賀6-25-1）                              |
| 978 | 深沢1丁目クリニック       | 158-0081 | 東京都世田谷区深沢1丁目クリニック                   | 03-5758-8310 | <a href="http://houmonshinryou.com/clinic/jukei-01/">http://houmonshinryou.com/clinic/jukei-01/</a> |                    | ○                  | 内科          | 安西 光洋<br>鹿野 真実 |                                                       |
| 979 | ふじいこどもクリニック      | 154-0017 | 東京都世田谷区世田谷4-1-3<br>世田谷医療COMMUNITY4階 | 03-5477-3377 | <a href="http://www.fujii-kids.com/">http://www.fujii-kids.com/</a>                                 | ○                  | ○                  | 小児科         | 藤井徹            |                                                       |
| 980 | 藤沢こどもクリニック       | 158-0082 | 東京都世田谷区等々力8-17-11                   | 03-5758-3377 | <a href="http://fcc.dcsv.jp">http://fcc.dcsv.jp</a>                                                 | ○                  | ○                  | 小児科         | 藤沢 康司          | 藤沢こどもクリニック（自院）                                        |
| 981 | 二子玉川ガーデン矯正歯科     | 158-0094 | 東京都世田谷区玉川3-20-1 名川ビル3階              | 03-5491-5454 | <a href="https://www.hanarabi-kirei.com">https://www.hanarabi-kirei.com</a>                         | ○                  | ○                  | 矯正歯科        | 石野 善男          |                                                       |

電話や情報通信機器を用いて診療を実施する医療機関の一覧（東京都）

|     | 基本情報             |          |                              |              |                                     | 事務連絡に基づく対応について     |                    |           |                      |                                                                                                                                                                                      |
|-----|------------------|----------|------------------------------|--------------|-------------------------------------|--------------------|--------------------|-----------|----------------------|--------------------------------------------------------------------------------------------------------------------------------------------------------------------------------------|
|     | 施設名              | 郵便番号     | 住所（都道府県から記載）                 | 電話番号         | ウェブサイトURL                           | 初診の電話等を用いた診療の実施の有無 | 再診の電話等を用いた診療の実施の有無 | 対応診療科     | 担当医師名                | 対面診療が必要と判断した場合に連携する医療機関名（複数ある場合は複数、住所も併せて記載）                                                                                                                                         |
| 982 | 二子玉川プレストクリニック    | 158-0094 | 東京都世田谷区玉川3-15-1 曾根ビル6階       | 03-3709-7717 | http://www.futakotamagawa-bc.jp     |                    | ○                  | 乳腺外科・外科   | 浜口 洋平                |                                                                                                                                                                                      |
| 983 | ほしの内科・アレルギークリニック | 156-0053 | 東京都世田谷区桜3-2-17DS桜ビル2階        | 03-5426-6567 | https://www.hoshialle.jp/           |                    | ○                  | 内科<br>小児科 | 星野 博                 |                                                                                                                                                                                      |
| 984 | 牧野皮膚科            | 158-0081 | 東京都世田谷区深沢6-35-2              | 03-3703-5430 | home.u05.itscom.net/dermakin/       | ○                  | ○                  | 皮膚科       | 牧野寒河江                |                                                                                                                                                                                      |
| 985 | 松尾内科クリニック        | 158-0097 | 東京都世田谷区用賀2-10-14 フォレスト446 1F | 03-5717-7272 | http://www.matsuo-naika.jp          |                    | ○                  | 内科        | 松尾 孝俊                | 関東中央病院（東京都世田谷区）                                                                                                                                                                      |
| 986 | 松原診療所            | 158-0091 | 東京都世田谷区中町2-37-19             | 03-3701-1233 |                                     |                    | ○                  | 内科<br>小児科 | 小池キャサリン<br>小池 満      | 独立行政法人国立病院機構東京医療センター（〒152-8902東京都目黒区東が丘2-5-1）<br>公立学校共済組合 関東中央病院（〒158-8531 東京都世田谷区上用賀6丁目25-1）<br>国立成育医療研究センター（〒157-0074 東京都世田谷区大蔵2丁目10-1）<br>日本赤十字社医療センター（〒150-8935 東京都渋谷区広尾4丁目1-22） |
| 987 | マリア皮フ科クリニック      | 156-0053 | 東京都世田谷区桜3丁目2-17 DS桜ビル 4-D    | 03-5477-1212 | https://maria-hifuka.jp/            | ○                  | ○                  | 皮膚科       | 平松 正浩                |                                                                                                                                                                                      |
| 988 | 丸山内科医院           | 158-0082 | 東京都世田谷区等々力8-6-3              | 03-3701-6457 | http://maruyama-naika.jimdofree.com | ○                  | ○                  | 内科        | 佐藤 明子                | 玉川病院 東京都世田谷区瀬田4-8-1                                                                                                                                                                  |
| 989 | 南鳥山クリニック         | 157-0062 | 東京都世田谷区南鳥山6-7-19グレイスビル1階     | 03-3309-1818 | https://www.minami-k-clinic.com     |                    | ○                  | 内科        | 野口 祥代                |                                                                                                                                                                                      |
| 990 | 明大前整形外科クリニック     | 151-0043 | 東京都世田谷区松原1-38-25             | 03-6304-7681 | https://ar-ex.jp/meidaimae          |                    | ○                  | 整形外科      | 成田哲也<br>久保貴敬<br>石塚怜王 |                                                                                                                                                                                      |

電話や情報通信機器を用いて診療を実施する医療機関の一覧（東京都）

|     | 基本情報           |          |                                 |              |                                               | 事務連絡に基づく対応について     |                    |                   |                                    |                                                                       |
|-----|----------------|----------|---------------------------------|--------------|-----------------------------------------------|--------------------|--------------------|-------------------|------------------------------------|-----------------------------------------------------------------------|
|     | 施設名            | 郵便番号     | 住所（都道府県から記載）                    | 電話番号         | ウェブサイトURL                                     | 初診の電話等を用いた診療の実施の有無 | 再診の電話等を用いた診療の実施の有無 | 対応診療科             | 担当医師名                              | 対面診療が必要と判断した場合に連携する医療機関名（複数ある場合は複数、住所も併せて記載）                          |
| 991 | 明大前皮フ科         | 156-0043 | 東京都世田谷区松原2-29-1 プランテラス松原202     | 03-6379-4156 | www.meidaimae-hifuka.com/                     |                    | ○                  | 皮膚科               | 新関寛徳                               |                                                                       |
| 992 | 目黒医院           | 158-0093 | 東京都世田谷区上野毛1-4-3                 | 03-3702-5496 | http://megurolin.net                          |                    | ○                  | 内科<br>老年内科        | 目黒 和子                              | 日産玉川病院（世田谷区瀬田4-8-1）<br>東京医療センター（目黒区東が丘2-5-1）<br>関東中央病院（世田谷区上用賀6-25-1） |
| 993 | 望月眼科クリニック      | 158-0081 | 東京都世田谷区奥沢3-28-7                 | 03-5754-4113 | https://www.mochizuki-ganka.com               |                    | ○                  | 眼科                | 望月 弘嗣                              |                                                                       |
| 994 | ゆうハートクリニック     | 155-0031 | 東京都世田谷区北沢2-1-16 アーバニティ下北沢2階     | 03-5432-9310 | http://youheart.net                           | ○                  | ○                  | 内科<br>循環器内科       | 鶴見 由起夫                             |                                                                       |
| 995 | ヨシダ消化器内科クリニック  | 157-0062 | 東京都世田谷区南烏山6-6-2                 | 03-5314-5552 | http://www5.plala.or.jp/yoshida-cl/           | ○                  | ○                  | 内科<br>消化器科        | 吉田 泉                               | 至誠会第二病院                                                               |
| 996 | 若林ゆうクリニック      | 154-0023 | 東京都世田谷区若林5-14-6<br>若林ゆうビルディング2階 | 03-3410-1120 | http://www.yu-cl.jp/                          |                    | ○                  | 内科<br>泌尿器科<br>ペイン | 五十嵐 裕恵<br>栗栖 寛子<br>五十嵐 一真<br>関島 千尋 |                                                                       |
| 997 | そしがや大蔵クリニック    | 157-0073 | 東京都世田谷区砧6-30-1 野原ビル1階           | 03-6411-1535 | http://www.soshigayaokura-clinic.jp           |                    | ○                  | リウマチ科<br>内科       | 中山久徳                               |                                                                       |
| 998 | グレースホームケアクリニック | 158-0083 | 東京都世田谷区奥沢3-35-14<br>島田マンション地下1階 | 03-6425-8858 | http://www.grace-dc.com/st2/gracedc-homecare/ | ○                  | ○                  | 内科                | 古田 晃                               |                                                                       |
| 999 | 松村医院           | 158-0093 | 東京都世田谷区上野毛3-4-16                | 03-3702-8358 | https://www.matsumura-iin.com/                |                    | ○                  | 内科<br>小児科         | 松村 真司                              |                                                                       |

電話や情報通信機器を用いて診療を実施する医療機関の一覧（東京都）

|      | 基本情報                 |          |                                   |              |                                                                                     | 事務連絡に基づく対応について     |                    |                        |                                   |                                              |
|------|----------------------|----------|-----------------------------------|--------------|-------------------------------------------------------------------------------------|--------------------|--------------------|------------------------|-----------------------------------|----------------------------------------------|
|      | 施設名                  | 郵便番号     | 住所（都道府県から記載）                      | 電話番号         | ウェブサイトURL                                                                           | 初診の電話等を用いた診療の実施の有無 | 再診の電話等を用いた診療の実施の有無 | 対応診療科                  | 担当医師名                             | 対面診療が必要と判断した場合に連携する医療機関名（複数ある場合は複数、住所も併せて記載） |
| 1000 | みくに内科眼科クリニック         | 154-0002 | 東京都世田谷区下馬1-45-17清水ビル1階            | 03-3411-3920 | <a href="https://mikuni.clinic/home">https://mikuni.clinic/home</a>                 |                    | ○                  | 内科                     | 三國盛夫                              |                                              |
| 1001 | 医療法人社団大南会上野毛あだちクリニック | 158-0093 | 東京都世田谷区上野毛2-7-16 玉屋ビル3F           | 03-6303-1114 | <a href="https://www.adachi-clinic.or.jp/">https://www.adachi-clinic.or.jp/</a>     | ○                  | ○                  | 内科、外科<br>乳腺外科<br>肛門外科  | 足立 幸博                             | 東京医療センター                                     |
| 1002 | ふくろうクリニック自由が丘        | 158-0083 | 東京都世田谷区奥沢6-20-23<br>フォーラム自由が丘1階2階 | 03-3705-3351 | <a href="http://www.296296.jp/jiyugaoka/">http://www.296296.jp/jiyugaoka/</a>       | ○                  | ○                  | 脳神経内科<br>脳神経外科<br>整形外科 | 橋本 昌也<br>伊澤真理子                    | ふくろうクリニック等々力<br>(東京都世田谷区等々力3-5-2)            |
| 1003 | 上田クリニック              | 158-0083 | 東京都世田谷区奥沢7-19-9                   | 03-6809-7031 | <a href="http://www.aoitorikai.com/">http://www.aoitorikai.com/</a>                 | ○                  | ○                  | 内科皮膚科                  | 堤 直也                              |                                              |
| 1004 | ニコこどもクリニック           | 158-0094 | 東京都世田谷区玉川1-15-6-102               | 03-6431-0205 | <a href="https://www.nicoco.jp">https://www.nicoco.jp</a>                           | ○                  | ○                  | 小児科<br>小児科             | 中澤 裕美子<br>内山 芽里                   |                                              |
| 1005 | 菅澤医院                 | 158-0093 | 東京都世田谷区中町4-31-13                  | 03-3701-1740 |                                                                                     |                    | ○                  | 内科<br>小児科              | 菅澤正明                              |                                              |
| 1006 | GPクリニック自由が丘          | 158-0083 | 東京都世田谷区奥沢6-21-12ベルヴェディア自由が丘201    | 03-6432-1223 | <a href="http://gp-cl.com/">http://gp-cl.com/</a>                                   | ○                  | ○                  | 内科                     | ・斉藤康洋<br>・安田里加子<br>・安田優<br>・亀井悠一郎 |                                              |
| 1007 | せたがや下馬クリニック          | 154-0002 | 東京都世田谷区下馬3-33-8                   | 03-6413-8471 | <a href="https://setagaya-shimouma.com/">https://setagaya-shimouma.com/</a>         | ○                  | ○                  | 消化器内科<br>内科            | 江藤 哲哉                             |                                              |
| 1008 | やまおかこどもクリニック         | 1560044  | 東京都世田谷区赤堤4-20-1 古谷ビル1F            | 03-5355-5072 | <a href="http://www.yk-clinic.jimdofree.com">http://www.yk-clinic.jimdofree.com</a> | ○                  | ○                  | 小児科 内科                 | 山岡光子                              |                                              |



電話や情報通信機器を用いて診療を実施する医療機関の一覧（東京都）

|      | 基本情報                                 |          |                                     |               |                                                                                           | 事務連絡に基づく対応について     |                    |                                                              |                                                                    |                                                                                                                                                                        |
|------|--------------------------------------|----------|-------------------------------------|---------------|-------------------------------------------------------------------------------------------|--------------------|--------------------|--------------------------------------------------------------|--------------------------------------------------------------------|------------------------------------------------------------------------------------------------------------------------------------------------------------------------|
|      | 施設名                                  | 郵便番号     | 住所（都道府県から記載）                        | 電話番号          | ウェブサイトURL                                                                                 | 初診の電話等を用いた診療の実施の有無 | 再診の電話等を用いた診療の実施の有無 | 対応診療科                                                        | 担当医師名                                                              | 対面診療が必要と判断した場合に連携する医療機関名（複数ある場合は複数、住所も併せて記載）                                                                                                                           |
| 1009 | 医療法人財団<br>放友クリニック                    | 150-0042 | 東京都渋谷区宇田川町7-13 第2共同ビル7階             | 03-3464-5078  |                                                                                           |                    | ○                  | 内科                                                           | 石川 道郎<br>荒木 洋                                                      |                                                                                                                                                                        |
| 1010 | 医療法人社団恵比寿会<br>淳クリニック                 | 150-0021 | 東京都渋谷区恵比寿西1-14-2 ツムラビル2F            | 03-5489-0463  | <a href="https://ebisukai.server-shared.com">https://ebisukai.server-shared.com</a>       | ○                  | ○                  | 内科<br>小児科                                                    | 内藤 淳                                                               | 日本赤十字社医療センター（東京都渋谷区広尾4-1-22）<br>東京都立広尾病院（東京都渋谷区恵比寿2-34-10）<br>JR東京総合病院（東京都渋谷区代々木2-1-3）<br>東京医科大学病院（東京都新宿区西新宿6-7-1）<br>厚生中央病院（東京都目黒区三田1-11-7）<br>東京共済病院（東京都目黒区中目黒2-3-8） |
| 1011 | 医療法人社団エヌシー会<br>メディカルクリニック渋谷          | 150-0002 | 東京都渋谷区渋谷3-29-17<br>JR東日本ホテルメッツ渋谷2階  | 03-6418-0024  | <a href="http://www.nc-shibuya.com">http://www.nc-shibuya.com</a>                         |                    | ○                  | 内科<br>消化器科                                                   | 岡野 雄介                                                              | 東京都立広尾病院（東京都渋谷区恵比寿2-34-10）                                                                                                                                             |
| 1012 | 医療法人社団慶照会 幡ヶ<br>谷内科クリニック             | 151-0072 | 東京都渋谷区幡ヶ谷2-16-8                     | 03-3373-4810  | <a href="https://hatagaya-hmc.com/">https://hatagaya-hmc.com/</a>                         |                    | ○                  | 内科<br>消化器内科<br>循環器内科                                         | 蜂矢 朗彦<br>蜂矢 由美子                                                    | JR東京総合病院（東京都渋谷区代々木2-1-3）<br>東京医科大学病院（東京都新宿区西新宿6-7-1）                                                                                                                   |
| 1013 | 医療法人社団玄英会<br>渋谷ウエストクリニック             | 150-0043 | 東京都渋谷区道玄坂1-5-4<br>照力ビル4F            | 03-6416-1964  | <a href="https://westclinic.tokyo/">https://westclinic.tokyo/</a>                         | ○                  | ○                  | 泌尿器科、皮膚<br>科                                                 | 中村有吾                                                               |                                                                                                                                                                        |
| 1014 | 医療法人社団創友会ヒラ<br>ハタクリニック               | 150-0002 | 東京都渋谷区渋谷1-24-6-9F                   | 03-3400-3288  | <a href="https://www.hirahata-clinic.or.jp/">https://www.hirahata-clinic.or.jp/</a>       | ○                  | ○                  | 内科                                                           | 平畑光一<br>神山ほなみ<br>積山慧美里                                             |                                                                                                                                                                        |
| 1015 | 医療法人社団 DAP<br>北青山Dクリニック              | 150-0001 | 東京都渋谷区神宮前3-7-10<br>AKERA（アケラ）ビル地下1階 | 050-7301-4555 | <a href="https://www.dsurgery.com/">https://www.dsurgery.com/</a>                         | ○                  | ○                  | 内科<br>外科<br>脳神経外科<br>循環器内科<br>呼吸器内科<br>消化器外科<br>消化器内科<br>婦人科 | 阿保 義久<br>辛 正廣<br>泉 雅文<br>池田 祐一<br>志賀 太郎<br>入江 秀大<br>金沢 考満<br>山下 裕玄 |                                                                                                                                                                        |
| 1016 | 医療法人社団ナイズ<br>キャブスククリニック代<br>官山T-SITE | 150-0033 | 東京都渋谷区猿楽町17-5 代官山蔦屋書店1号館3F          | 03-4579-2959  | <a href="https://www.caps-clinic.jp/daikanyama">https://www.caps-clinic.jp/daikanyama</a> | ○                  | ○                  | 小児科                                                          | 野呂 恵子                                                              |                                                                                                                                                                        |
| 1017 | 医療法人社団和会<br>渋谷コアクリニック                | 150-0002 | 東京都渋谷区渋谷1-9-8<br>朝日生命宮益坂ビル3階        | 03-3498-2111  | <a href="https://www.core-cl.com">https://www.core-cl.com</a>                             |                    | ○                  | 内科                                                           | 川井 邦彦<br>増尾 光樹                                                     |                                                                                                                                                                        |

電話や情報通信機器を用いて診療を実施する医療機関の一覧（東京都）

|      | 基本情報                                   |          |                                    |              |                                                     | 事務連絡に基づく対応について     |                    |                       |                                    |                                              |
|------|----------------------------------------|----------|------------------------------------|--------------|-----------------------------------------------------|--------------------|--------------------|-----------------------|------------------------------------|----------------------------------------------|
|      | 施設名                                    | 郵便番号     | 住所（都道府県から記載）                       | 電話番号         | ウェブサイトURL                                           | 初診の電話等を用いた診療の実施の有無 | 再診の電話等を用いた診療の実施の有無 | 対応診療科                 | 担当医師名                              | 対面診療が必要と判断した場合に連携する医療機関名（複数ある場合は複数、住所も併せて記載） |
| 1018 | 医療法人社団BODHI<br>Dr. KAKUKOスポーツクリ<br>ニック | 150-0033 | 東京都渋谷区猿楽町9-8-111                   | 03-5784-1101 | http://www.dk-sc                                    |                    | ○                  | 整形外科                  | 中村 格子<br>阿多 由梨加                    |                                              |
| 1019 | 医療法人社団ベルル<br>マーガレットこどもクリ<br>ニック        | 151-0053 | 東京都渋谷区代々木4-37-15 およこ基地シ<br>ブヤ 3F   | 03-6276-8657 | https://margaret-kodomo.jp                          | ○                  | ○                  | 小児科                   | 田中 純子<br>吉野 ラモナ<br>大瀧 理佐子<br>曾根 尚子 |                                              |
| 1020 | 医療法人道心会<br>恵比寿内科クリニック                  | 150-0022 | 東京都渋谷区恵比寿南1-1-1<br>ヒューマックスビル4F     | 03-3719-4411 | https://www.ebisu-hifuka.jp/                        |                    | ○                  | 内科                    | 菅原 道代                              |                                              |
| 1021 | 医療法人道心会<br>恵比寿皮膚科クリニック                 | 150-0022 | 東京都渋谷区恵比寿南1-1-1<br>ヒューマックスビル4F     | 03-3719-2266 | https://www.ebisu-<br>hifuka.jp/medical/index5.html |                    | ○                  | 皮膚科                   | 丸山 和道                              |                                              |
| 1022 | 医療法人道心会<br>恵比寿形成外科・<br>美容クリニック         | 150-0022 | 東京都渋谷区恵比寿南1-4-15<br>恵比寿銀座クロスビル4F   | 03-5725-1115 | https://ebisu-keiseibiyou.jp/                       |                    | ○                  | 形成外科<br>美容外科<br>美容皮膚科 | 西島 順子<br>西島 暁生                     |                                              |
| 1023 | 医療法人社団 鴻鶴会<br>恵比寿クリニック                 | 150-0013 | 東京都渋谷区恵比寿4-1-18恵比寿ネオナート 2階         | 03-3440-3131 | http://ebisu.clinic.or.jp/                          | ○                  | ○                  | 内科<br>消化器科            | 宗林 祐史<br>中島 清隆<br>黒堀 ゆう子           |                                              |
| 1024 | 恵比寿ウィメンズクリ<br>ニック                      | 150-0022 | 東京都渋谷区恵比寿南1丁目4番15号恵比寿銀座ク<br>ロスビル5階 | 03-6452-4276 | https://ebisu-womens.jp/                            | ○                  | ○                  | 婦人科                   | 堤 麻衣                               |                                              |
| 1025 | 恵比寿門脇ブレストクリ<br>ニック                     | 150-0013 | 東京都渋谷区恵比寿1-9-4 門脇ビル5F              | 03-5424-1100 | http://ebisu-breast-<br>clinic.com/                 |                    | ○                  | 乳腺外科<br>甲状腺外科         | 門脇 正美                              |                                              |
| 1026 | えびす耳鼻咽喉科                               | 150-0013 | 東京都渋谷区恵比寿1-9-4メディカル恵比寿ビル           | 03-3441-1187 | http://ebisu-jibika.jp/s/                           | ○                  | ○                  | 耳鼻咽喉科                 | 片山 諭                               |                                              |

電話や情報通信機器を用いて診療を実施する医療機関の一覧（東京都）

|      | 基本情報             |          |                                    |              |                                                                                       | 事務連絡に基づく対応について     |                    |                           |               |                                                        |
|------|------------------|----------|------------------------------------|--------------|---------------------------------------------------------------------------------------|--------------------|--------------------|---------------------------|---------------|--------------------------------------------------------|
|      | 施設名              | 郵便番号     | 住所（都道府県から記載）                       | 電話番号         | ウェブサイトURL                                                                             | 初診の電話等を用いた診療の実施の有無 | 再診の電話等を用いた診療の実施の有無 | 対応診療科                     | 担当医師名         | 対面診療が必要と判断した場合に連携する医療機関名（複数ある場合は複数、住所も併せて記載）           |
| 1027 | 恵比寿脳神経外科・内科クリニック | 150-0022 | 東京都渋谷区恵比寿南1-4-15<br>恵比寿銀座クロスビル 3階  | 03-3712-1188 | <a href="https://ebisu-cl.com">https://ebisu-cl.com</a>                               |                    | ○                  | 脳神経外科<br>内科               | 鈴木 一郎         | 日赤医療センター（東京都渋谷区広尾4-1-22）<br>東京都立広尾病院（東京都渋谷区恵比寿2-34-10） |
| 1028 | 恵比寿みかレディースクリニック  | 150-0022 | 東京都渋谷区恵比寿南1-14-12 ルソレイユ3 3F        | 03-5734-1654 |                                                                                       |                    | ○                  | 婦人科                       | 田中 美香         |                                                        |
| 1029 | 大平医院             | 150-0031 | 東京都渋谷区桜丘町23-17 1F                  | 03-3462-1575 | <a href="https://ohira-clinic.jp">https://ohira-clinic.jp</a>                         | ○                  | ○                  | 内科<br>小児科                 | 大平良和<br>田邊真帆  | 都立広尾病院 日本赤十字医療センターなど                                   |
| 1030 | おさめスキンクリニック      | 150-0021 | 東京都渋谷区恵比寿西2-17-8 I・T・0代官山202       | 03-3464-2005 | <a href="http://www.osame-skinclinic.com/">http://www.osame-skinclinic.com/</a>       | ○                  | ○                  | 皮膚科                       | 納 さつき         | 同左                                                     |
| 1031 | MYメディカルクリニック     | 150-0042 | 東京都渋谷区宇田川町20-17 NMF渋谷公園通りビル5F      | 03-4579-9011 | <a href="https://mymc.jp/">https://mymc.jp/</a>                                       | ○                  | ○                  | 総合内科<br>消化器内科<br>糖尿病内科    | 笹倉 渉<br>伊藤 公博 |                                                        |
| 1032 | きかわだクリニック        | 151-0053 | 東京都渋谷区代々木1-43-7 SKビル1階             | 03-3379-2002 | <a href="https://kikawada-clinic.jp/">https://kikawada-clinic.jp/</a>                 |                    | ○                  | 内科                        | 黄川田 雅之        |                                                        |
| 1033 | 金王坂クリニック         | 150-0002 | 東京都渋谷区渋谷3-6-18 第4矢木ビル2F            | 03-5464-1234 | <a href="https://www.konnozakaclinic.com/">https://www.konnozakaclinic.com/</a>       | ○                  | ○                  | 内科<br>漢方内科<br>感染症科<br>精神科 | 西大條文一<br>木村好珠 |                                                        |
| 1034 | 銀座よしえクリニック表参道院   | 150-0001 | 東京都渋谷区神宮前4-9-4 BCG表参道プロパティ3F       | 0120-398-885 | <a href="https://www.ginzabiyou.com/">https://www.ginzabiyou.com/</a>                 | ○                  | ○                  | 皮膚科<br>美容皮膚科              | 担当医           |                                                        |
| 1035 | クオーツメディカルクリニック   | 150-0002 | 東京都渋谷区渋谷2丁目10-10 徳真会QUARTZTOWER 8F | 03-6362-6680 | <a href="http://www.quartztower.com/medical/">http://www.quartztower.com/medical/</a> |                    | ○                  | 皮膚科<br>内科                 | 堀江 千穂         |                                                        |

電話や情報通信機器を用いて診療を実施する医療機関の一覧（東京都）

|      | 基本情報                  |          |                                |              |                                                                                                                                                                                                                                                                                                                                                                               | 事務連絡に基づく対応について     |                      |                      |                                                                     |                                                                                                                                                                                            |
|------|-----------------------|----------|--------------------------------|--------------|-------------------------------------------------------------------------------------------------------------------------------------------------------------------------------------------------------------------------------------------------------------------------------------------------------------------------------------------------------------------------------|--------------------|----------------------|----------------------|---------------------------------------------------------------------|--------------------------------------------------------------------------------------------------------------------------------------------------------------------------------------------|
|      | 施設名                   | 郵便番号     | 住所（都道府県から記載）                   | 電話番号         | ウェブサイトURL                                                                                                                                                                                                                                                                                                                                                                     | 初診の電話等を用いた診療の実施の有無 | 再診の電話等を用いた診療の実施の有無   | 対応診療科                | 担当医師名                                                               | 対面診療が必要と判断した場合に連携する医療機関名（複数ある場合は複数、住所も併せて記載）                                                                                                                                               |
| 1036 | 小泉クリニック               | 151-0072 | 東京都渋谷区幡ヶ谷1-31-6                | 03-3460-5123 | <a href="http://www.koizumi.clinic">http://www.koizumi.clinic</a>                                                                                                                                                                                                                                                                                                             |                    | ○                    | 内科                   | 小泉信達                                                                |                                                                                                                                                                                            |
| 1037 | サン・キタノクリニック           | 150-0021 | 東京都渋谷区恵比寿西1-20-7               | 03-3461-3317 |                                                                                                                                                                                                                                                                                                                                                                               | ○                  | ○                    | 内科                   | 北野 裕巳                                                               |                                                                                                                                                                                            |
| 1038 | 参宮橋脊椎外科病院             | 151-0053 | 東京都渋谷区代々木3-57-1                | 03-5308-0511 | <a href="https://clinics.medley.life/clinics/5c2188b32400004d69b83d2">https://clinics.medley.life/clinics/5c2188b32400004d69b83d2</a>                                                                                                                                                                                                                                         | ○                  | ○                    | 整形外科                 | 大堀 靖夫<br>米澤 郁穂<br>網代 泰充<br>吉田 真<br>橋本 敬史                            |                                                                                                                                                                                            |
| 1039 | 渋谷駅前おおしま皮膚科           | 150-0031 | 東京都渋谷区桜丘町25-18NT渋谷ビル3F         | 03-3770-3388 | <a href="https://shibuya-hifuka.jp/">https://shibuya-hifuka.jp/</a>                                                                                                                                                                                                                                                                                                           | ○                  | ○<br>診療日の14:00~16:00 | 皮膚科<br>小児皮膚科<br>形成外科 | 大島 昇                                                                | 東京大学医学部附属病院（東京都文京区本郷7-3-1）                                                                                                                                                                 |
| 1040 | 渋谷リーフクリニック            | 150-0043 | 東京都渋谷区道玄坂2-23-14 道玄坂225ビル4階    | 03-5457-1274 | <a href="http://leaf.clinic/">http://leaf.clinic/</a>                                                                                                                                                                                                                                                                                                                         |                    | ○                    | 内科<br>胃腸内科<br>泌尿器科   | 玉山 隆章                                                               |                                                                                                                                                                                            |
| 1041 | 湘南AGAクリニック新宿本院        | 151-0053 | 東京都渋谷区代々木2-2-13 新宿TRビル4階       | 0120-548-911 | <a href="https://www.sbc-aga.jp/clinic/branch/agashinju-ku/?fd_bridge_id=YksyRnVRSHgVWGcvZEtyM1lnVUJSdz09LS13KzZMMVpv0GVaekFlbWhtTG9Xb053PT0%3D--77cf0d149b37f0c285feb1bf16cb51557813afa">https://www.sbc-aga.jp/clinic/branch/agashinju-ku/?fd_bridge_id=YksyRnVRSHgVWGcvZEtyM1lnVUJSdz09LS13KzZMMVpv0GVaekFlbWhtTG9Xb053PT0%3D--77cf0d149b37f0c285feb1bf16cb51557813afa</a> |                    | ○                    | 美容皮膚科                | 笠井敬一郎<br>中司 圭<br>荒川 昌彦<br>蛸沢 克己<br>塩川 一郎<br>徳永 能隆<br>山本 淳子<br>谷治 春香 | 湘南AGAクリニック西新宿院（東京都新宿区西新宿7-21-3 西新宿大京ビル7F）<br>湘南AGAクリニック大阪院（大阪府大阪市北区曽根崎新地1-4-12 桜橋プラザビル6F）<br>湘南AGAクリニック仙台院（宮城県仙台市宮城野区榴丘2-2-12 アーバンライフ橋本2F）<br>湘南AGAクリニック福岡院（福岡県福岡市中央区天神3-3-14 ホテルアセント福岡2F） |
| 1042 | シロノクリニック恵比寿           | 150-0012 | 東京都渋谷区広尾1-1-40恵比寿プライムスクエアプラザ2F | 0120-11-4422 | <a href="https://www.shirono.net/about/clinic/ebisu.html">https://www.shirono.net/about/clinic/ebisu.html</a>                                                                                                                                                                                                                                                                 | ○                  | ○                    | 美容皮膚科                | 江馬 潤<br>大内 恵理<br>友利 新                                               |                                                                                                                                                                                            |
| 1043 | 神宮外苑Woman Life Clinic | 150-0001 | 東京都渋谷区神宮前3-39-5 QizA0YAMA2F    | 03-6432-9385 | <a href="https://www.woman-life-clinic.com/">https://www.woman-life-clinic.com/</a>                                                                                                                                                                                                                                                                                           | ○                  | ○                    | 女性内科(内科・婦人科)         | 伊沢 博美                                                               | 日本赤十字社医療センター（東京都渋谷区広尾4-1-22）<br>東京都立広尾病院（東京都渋谷区恵比寿2-34-10）<br>JR 東京総合病院（東京都渋谷区代々木2-1-3）                                                                                                    |
| 1044 | 新宿内科                  | 151-0053 | 東京都渋谷区代々木2-9-5森本ビル8階           | 03-6276-6233 | <a href="https://shinjuku-naika.jp/">https://shinjuku-naika.jp/</a>                                                                                                                                                                                                                                                                                                           | ○                  | ○                    | 内科<br>消化器科           | 廣瀬 徳彦<br>絹川 千尋<br>西村 亜希子                                            | JCHO東京山手メディカルセンター（東京都新宿区百人町3丁目2-2-1）<br>東京医科大学病院（東京都新宿区西新宿6丁目7-1）                                                                                                                          |

電話や情報通信機器を用いて診療を実施する医療機関の一覧（東京都）

|      | 基本情報               |          |                              |               |                                                                                                                           | 事務連絡に基づく対応について     |                    |                             |                                                         |                                                      |
|------|--------------------|----------|------------------------------|---------------|---------------------------------------------------------------------------------------------------------------------------|--------------------|--------------------|-----------------------------|---------------------------------------------------------|------------------------------------------------------|
|      | 施設名                | 郵便番号     | 住所（都道府県から記載）                 | 電話番号          | ウェブサイトURL                                                                                                                 | 初診の電話等を用いた診療の実施の有無 | 再診の電話等を用いた診療の実施の有無 | 対応診療科                       | 担当医師名                                                   | 対面診療が必要と判断した場合に連携する医療機関名（複数ある場合は複数、住所も併せて記載）         |
| 1045 | 新宿駅前うわじま皮膚科        | 151-0053 | 東京都渋谷区代々木2-6-7セイチビル4F        | 03-3373-4112  | <a href="http://uwajima-hifuka.com">http://uwajima-hifuka.com</a>                                                         | ○                  | ○                  | 皮膚科<br>形成外科                 | 上嶋 祐太                                                   | 新宿駅前うわじま皮膚科（東京都渋谷区代々木2-6-7セイチビル4階）                   |
| 1046 | 睡眠総合ケアクリニック<br>代々木 | 151-0053 | 東京都渋谷区代々木5丁目10番10号SYビル       | 03-6300-5401  | <a href="https://www.somnology.com/">https://www.somnology.com/</a>                                                       |                    | ○                  | 精神科<br>耳鼻科<br>呼吸器内科<br>神経内科 | 井上 雄一<br>碓氷 章<br>中山 秀章<br>竹内 暢<br>松澤 重行<br>柳原 万里子<br>ほか |                                                      |
| 1047 | 代官山診療所             | 150-0033 | 東京都渋谷区猿楽町24-7代官山プラザ301       | 03-5728-3165  | <a href="http://daikanyamashinryojo.la.coocan.jp/">http://daikanyamashinryojo.la.coocan.jp/</a>                           |                    | ○                  | 内科<br>脳神経外科<br>外科           | 植木 泰行                                                   | 東京都立広尾病院（東京都渋谷区恵比寿2-34-10）<br>東京共済病院（東京都目黒区中目黒2-3-8） |
| 1048 | 代官山内科外科クリニック       | 150-0033 | 東京都渋谷区猿楽町21-3                | 03-6455-0460  | <a href="http://d-cl.jp">http://d-cl.jp</a>                                                                               | ○                  | ○                  | 内科 外科<br>整形外科 皮膚科           | 深瀬 達                                                    |                                                      |
| 1049 | 代官山パークサイドクリニック     | 150-0034 | 東京都渋谷区代官山町16-1カスティヨ代官山2F     | 03-5456-6282  | <a href="https://www.parksideclinic.jp/">https://www.parksideclinic.jp/</a>                                               | ○                  | ○                  | 内科                          | 岡宮 裕                                                    | 東京共済病院（東京都目黒区中目黒2-3-8）                               |
| 1050 | たからぎ医院             | 150-0011 | 東京都渋谷区東2-24-4 荒井ビル4階         | 070-4293-2232 | <a href="https://www.takaragi-iin.net/">https://www.takaragi-iin.net/</a>                                                 | ○                  | ○                  | 小児科                         | 宝樹 真理                                                   |                                                      |
| 1051 | 千春皮膚科クリニック<br>広尾院  | 150-0012 | 東京都渋谷区広尾5-3-13 Barbizon86 2F | 03-3447-1177  | <a href="https://chiharu-hifuka.com">https://chiharu-hifuka.com</a>                                                       |                    | ○                  | 皮膚科<br>形成外科<br>小児皮膚科        | 渡邊 千春<br>土原 佳与<br>近藤 由佳<br>朝蔭 洋子                        |                                                      |
| 1052 | 東京都立広尾病院           | 150-0013 | 東京都渋谷区恵比寿2-34-10             | 03-3444-1181  | <a href="https://www.byouin.metro.tokyo.lg.jp/hiroo/index.html">https://www.byouin.metro.tokyo.lg.jp/hiroo/index.html</a> |                    | ○                  | 全診療科                        | 各医師                                                     |                                                      |
| 1053 | 東京原宿医院             | 150-0001 | 東京都渋谷区神宮前1-10-23             | 03-3402-7474  |                                                                                                                           |                    | ○                  | 内科                          | 中村 穰                                                    |                                                      |

電話や情報通信機器を用いて診療を実施する医療機関の一覧（東京都）

|      | 基本情報         |          |                         |              |                                                                                               | 事務連絡に基づく対応について     |                    |                      |               |                                                          |
|------|--------------|----------|-------------------------|--------------|-----------------------------------------------------------------------------------------------|--------------------|--------------------|----------------------|---------------|----------------------------------------------------------|
|      | 施設名          | 郵便番号     | 住所（都道府県から記載）            | 電話番号         | ウェブサイトURL                                                                                     | 初診の電話等を用いた診療の実施の有無 | 再診の電話等を用いた診療の実施の有無 | 対応診療科                | 担当医師名         | 対面診療が必要と判断した場合に連携する医療機関名（複数ある場合は複数、住所も併せて記載）             |
| 1054 | 道玄坂ふじたクリニック  | 154-0043 | 東京都渋谷区道玄坂1-10-19糸井ビル4F  | 03-5489-5100 | <a href="http://www.dogenzaka/org">http://www.dogenzaka/org</a>                               |                    | ○                  | 児童精神科<br>精神科<br>心療内科 | 藤田 基<br>藤田 観喜 |                                                          |
| 1055 | 内藤小児科内科医院    | 150-0022 | 東京都渋谷区恵比寿南2-5-9         | 03-3713-2526 | <a href="http://www.naitou-cl.com/">http://www.naitou-cl.com/</a>                             |                    | ○                  | 内科<br>小児科            | 内藤章文          |                                                          |
| 1056 | 中島医院         | 150-0046 | 東京都渋谷区松濤1-8-16          | 03-346-7501  | <a href="http://home.k03.itscom.net/nakajima/">http://home.k03.itscom.net/nakajima/</a>       |                    | ○                  | 内科<br>小児科            | 中島俊一          |                                                          |
| 1057 | ニキ・ハートクリニック  | 151-0071 | 東京都渋谷区本町4-16-9 コヅカビル1F  | 03-6383-3512 | <a href="https://niki-heartclinic.business.site/">https://niki-heartclinic.business.site/</a> | ○                  | ○                  | 内科                   | 仁木清美          |                                                          |
| 1058 | はたがや協立診療所    | 151-0072 | 東京都渋谷区幡ヶ谷3-9-11         | 03-5304-0621 |                                                                                               |                    | ○                  | 内科<br>循環器科           | 園田 久子         |                                                          |
| 1059 | 浜内科クリニック     | 151-0066 | 東京都渋谷区西原3-2-4 丸幸ビル2階    | 03-3481-2061 | <a href="https://hamaclinic.wixsite.com/mysite">https://hamaclinic.wixsite.com/mysite</a>     | ○                  | ○                  | 内科                   | 濱 英永          |                                                          |
| 1060 | 東肛門科胃腸科クリニック | 150-0021 | 東京都渋谷区恵比寿1-9-7 ITOX3F   | 03-3280-0021 | <a href="http://www.azumacclinic.com/">www.azumacclinic.com/</a>                              | ○                  | ○                  | 内科<br>胃腸科            | 東 光邦<br>古嶋 薫  |                                                          |
| 1061 | 広尾内科クリニック    | 150-0012 | 東京都渋谷区広尾5-11-12         | 03-6277-3916 | <a href="http://www.hiroomedclinic.com/">http://www.hiroomedclinic.com/</a>                   | ○                  | ○                  | 内科                   | 古川 孝美         | 都立広尾病院（東京都渋谷区恵比寿2-34-10）<br>日本赤十字社医療センター（東京都渋谷区広尾4-1-22） |
| 1062 | 広尾メンタルクリニック  | 150-0012 | 東京都渋谷区広尾5-14-2 広尾KKビル3階 | 03-6277-3133 | <a href="https://hiroo-mental.jp/">https://hiroo-mental.jp/</a>                               |                    | ○                  | 精神科<br>心療内科          | 熱田 英範         |                                                          |

電話や情報通信機器を用いて診療を実施する医療機関の一覧（東京都）

|      | 基本情報                     |          |                              |              |                                                | 事務連絡に基づく対応について     |                    |                                                                |                         |                                                                                        |
|------|--------------------------|----------|------------------------------|--------------|------------------------------------------------|--------------------|--------------------|----------------------------------------------------------------|-------------------------|----------------------------------------------------------------------------------------|
|      | 施設名                      | 郵便番号     | 住所（都道府県から記載）                 | 電話番号         | ウェブサイトURL                                      | 初診の電話等を用いた診療の実施の有無 | 再診の電話等を用いた診療の実施の有無 | 対応診療科                                                          | 担当医師名                   | 対面診療が必要と判断した場合に連携する医療機関名（複数ある場合は複数、住所も併せて記載）                                           |
| 1063 | フェニックスメディカルクリニック         | 151-0051 | 東京都渋谷区千駄ヶ谷3-4-1-6            | 03-3478-3535 | http://www.phoenix.gr.jp                       | ○                  | ○                  | 内科、外科、婦人科、眼科                                                   | 全医師対応可能                 |                                                                                        |
| 1064 | みいクリニック代々木               | 151-0053 | 東京都渋谷区代々木2-44-12             | 03-6276-5385 | https://mih-clinic.com/                        | ○                  | ○                  | 内科<br>小児科                                                      | 宮田 俊男<br>三島 果子<br>三島 千明 |                                                                                        |
| 1065 | 美和メディカルクリニック             | 150-0001 | 東京都渋谷区神宮前4-2-17-4A           | 03-5770-3855 | https://www.miwamedical.net                    |                    | ○                  | 内科<br>小児科<br>皮膚科<br>アレルギー科                                     | 小林美和子                   | 東京都立広尾病院（東京都渋谷区恵比寿2-34-10）<br>日本赤十字社医療センター（東京都渋谷区広尾4-1-22）                             |
| 1066 | Medical Switch in clinic | 510-0002 | 東京都渋谷区渋谷1-9-5 高橋ビル3F         | 03-5778-3600 | http://medicalswitch.com/                      | ○                  | ○                  | 心療内科<br>精神科                                                    | 小林 由佳                   |                                                                                        |
| 1067 | 南新宿クリニック<br>耳鼻科・小児科      | 151-0053 | 東京都渋谷区代々木2-11-12南新宿セントラルビル6F | 03-3373-4109 | http://minamishinjuku-clinic.jp/               |                    | ○                  | 耳鼻科<br>小児科                                                     | 木村 暁弘<br>木村 絢子          | JR東京総合病院（東京都渋谷区代々木2-1-3）<br>東京医科大学病院（東京都新宿区西新宿6-7-1）                                   |
| 1068 | 矢澤クリニック渋谷                | 151-0064 | 東京都渋谷区上原1-33-11 2F           | 03-5738-7282 | https://www.yazawaclinic.jp/                   | ○                  | ○                  | 内科<br>泌尿器科<br>神経内科<br>循環器内科<br>呼吸器内科<br>消化器内科<br>緩和ケア内科<br>小児科 | 矢澤 聰<br>田中 恒任           | 日本赤十字社医療センター（東京都渋谷区広尾4-1-22）<br>東京都立広尾病院（東京都渋谷区恵比寿2-34-10）<br>JR東京総合病院（東京都渋谷区代々木2-1-3） |
| 1069 | ゆみのハートクリニック<br>渋谷        | 150-0031 | 東京都渋谷区桜ヶ丘25-18NT渋谷ビル2F       | 03-3461-8838 | https://shibuya.yumino-clinic.com/             | ○                  | ○                  | 内科<br>循環器内科                                                    | 西原崇創<br>鮫島光博<br>弓野 大    | JR総合東京病院（東京都渋谷区代々木2-1-3）<br>都立広尾病院（東京都渋谷区恵比寿2丁目34-10）                                  |
| 1070 | 横山皮膚科クリニック               | 150-0012 | 東京都渋谷区広尾5-14-2 広尾KKビル5階      | 03-3440-1225 | https://www.yokoyama-skin-clinic.jp/index.html | ○                  | ○                  | 皮膚科                                                            | 横山美保子                   |                                                                                        |
| 1071 | 代々木上原駅前内科クリニック           | 151-0066 | 東京都渋谷区西原3-7-8フィールド代々木上原2F    | 03-5790-9880 | https://yoyogiuehara-cl.com/                   | ○                  | ○                  | 内科                                                             | 大田 幹                    |                                                                                        |

電話や情報通信機器を用いて診療を実施する医療機関の一覧（東京都）

|      | 基本情報            |          |                            |              |                                                      | 事務連絡に基づく対応について     |                    |                                                    |                                  |                                                      |
|------|-----------------|----------|----------------------------|--------------|------------------------------------------------------|--------------------|--------------------|----------------------------------------------------|----------------------------------|------------------------------------------------------|
|      | 施設名             | 郵便番号     | 住所（都道府県から記載）               | 電話番号         | ウェブサイトURL                                            | 初診の電話等を用いた診療の実施の有無 | 再診の電話等を用いた診療の実施の有無 | 対応診療科                                              | 担当医師名                            | 対面診療が必要と判断した場合に連携する医療機関名（複数ある場合は複数、住所も併せて記載）         |
| 1072 | 代々木上原皮膚科クリニック   | 151-0064 | 東京都渋谷区上原1-17-7 2F          | 03-6407-2121 | http://www.uehara-hifu.jp                            |                    | ○                  | 皮膚科                                                | 竹尾 千景<br>臼井 佳恵<br>保母 彩子<br>前 賢一郎 |                                                      |
| 1073 | 代々木の森耳鼻咽喉科      | 151-0063 | 東京都渋谷区富ヶ谷1-8-3 安達ビル2F      | 03-5453-8733 | http://www.yoyoginomori-orl.com/japan/main/main.html | ○                  | ○                  | 耳鼻咽喉科                                              | 森 幸子<br>渡辺 建介                    |                                                      |
| 1074 | 代々木八幡クリニック      | 151-0063 | 東京都渋谷区富ヶ谷1-51-4代々木八幡猪山ビル2F | 03-3465-2662 | https://yyhclinic.wixsite.com/yyhclinic              | ○                  |                    | 内科<br>整形外科<br>心療内科<br>神経科<br>リハビリテーション科            | 山本 友佳子                           |                                                      |
| 1075 | 代々木病院           | 151-0051 | 東京都渋谷区千駄ヶ谷一丁目30-7          | 03-3404-7661 | www.tokyo-kinikai.com/yoyogi/                        |                    | ○                  | 内科・外科・整形外科<br>外科・麻酔科・眼科<br>科・泌尿器科・皮膚科<br>科・精神科・神経科 | 全ての医師が対応している                     |                                                      |
| 1076 | 若樹内科クリニック       | 150-0043 | 東京都渋谷区道玄坂1-20-12 MT道玄坂401  | 03-5935-8013 |                                                      | ○                  | ○                  | 内科                                                 | 安田 浩子                            | 日赤医療センター（東京都渋谷区広尾4-1-22）<br>都立広尾病院（東京都渋谷区恵比寿2-34-10） |
| 1077 | 恵比寿プラスクリニック     | 150-0013 | 東京都渋谷区恵比寿1丁目7-12 追分ビル6階    | 03-6277-2211 | https://plus-cl.com/ebisu/                           | ○                  | ○                  | 内科<br>皮膚科                                          | 松田卓也<br>吉武秀平                     |                                                      |
| 1078 | ウェルネストクリニック     | 150-0043 | 東京都渋谷区道玄坂2-3-2 大外ビル3階      | 03-6732-6001 | https://wellnest-clinic.jp/                          | ○                  | ○                  | 内科/循環器内科<br>/糖尿病内科/内分泌内科/産婦人科                      | 薬師寺忠幸                            |                                                      |
| 1079 | ウェルネストメンタルクリニック | 150-0043 | 東京都渋谷区道玄坂2-3-2 大外ビル3階      | 03-6732-6002 | https://wellnest-clinic.jp/                          | ○                  | ○                  | 心療内科/精神科                                           | 井村昌義                             |                                                      |
| 1080 | 恵比寿こどもクリニック     | 150-0071 | 東京都渋谷区恵比寿4-9-13-301        | 03-3442-2525 | http://www.ebisukodomo.jp                            | ○                  | ○                  | 小児科<br>アレルギー科                                      | 保科 しほ                            | 日本赤十字医療センター（東京都渋谷区広尾4-1-22）                          |



電話や情報通信機器を用いて診療を実施する医療機関の一覧（東京都）

|      | 基本情報                     |              |                            |              |                                                                                                     | 事務連絡に基づく対応について     |                    |                       |        |                                                 |
|------|--------------------------|--------------|----------------------------|--------------|-----------------------------------------------------------------------------------------------------|--------------------|--------------------|-----------------------|--------|-------------------------------------------------|
|      | 施設名                      | 郵便番号         | 住所（都道府県から記載）               | 電話番号         | ウェブサイトURL                                                                                           | 初診の電話等を用いた診療の実施の有無 | 再診の電話等を用いた診療の実施の有無 | 対応診療科                 | 担当医師名  | 対面診療が必要と判断した場合に連携する医療機関名（複数ある場合は複数、住所も併せて記載）    |
| 1081 | アイシークリニック新宿院             | 151-0053     | 東京都渋谷区代々木2-5-3<br>イマス葵ビル2階 | 03-6276-3870 | <a href="https://ic-clinic.com">https://ic-clinic.com</a>                                           | ○                  | ○                  | 形成外科                  | 佐藤 昌樹  |                                                 |
| 1082 | 東京原宿クリニック                | 150-0001     | 東京都渋谷区神宮前6丁目29-3 原宿KYビル10階 | 03-5962-7570 | <a href="https://th-clinic.com/">https://th-clinic.com/</a>                                         | ○                  | ○                  | 内科                    | 篠原 岳   |                                                 |
| 1083 | あけのほし内科クリニック             | 03-3386-6500 | 東京都中野区中野5-67-4 中野北口ビル2F    | 03-3386-6500 | <a href="http://www.akenohoshi-clinic.jp/">http://www.akenohoshi-clinic.jp/</a>                     | ○                  | ○                  | 内科                    | 丸山 祥司  |                                                 |
| 1084 | 医療法人社団あんず会<br>いしい内科クリニック | 165-0025     | 東京都中野区沼袋4-31-11 メイゾン丸山1階   | 03-5345-7667 | <a href="http://isicl.jp/">http://isicl.jp/</a>                                                     |                    | ○                  | 内科                    | 石井 史   |                                                 |
| 1085 | 医療法人社団佐介会 田中<br>クリニック    | 164-0003     | 東京都中野区東中野3-17-18           | 03-5348-2707 | <a href="https://tanaka-clinic.org">https://tanaka-clinic.org</a>                                   | ○                  | ○                  | 内科<br>呼吸器内科<br>アレルギー科 | 田中 佐和子 | 横島病院（東京都中野区）<br>東京女子医科大学病院（東京都新宿区）              |
| 1086 | 医療法人社団三峰会宮下<br>医院        | 164-0014     | 東京都中野区南台 2-24-12           | 03-5385-3050 |                                                                                                     | ○                  | ○                  | 内科<br>小児科             | 宮下宏一   |                                                 |
| 1087 | 医療法人社団 浩悠会<br>田沼内科・小児科医院 | 164-0012     | 東京都中野区本町6-23-3             | 03-3380-2622 | <a href="http://www.e-doctors-net.com/nakano/tanuma">http://www.e-doctors-net.com/nakano/tanuma</a> |                    | ○                  | 内科<br>小児科             | 田沼 美昭  |                                                 |
| 1088 | 医療法人社団 中村診療<br>所         | 164-0012     | 東京都中野区本町5-39-2             | 03-3381-3797 |                                                                                                     |                    | ○                  | 内科                    | 中村 洋一  |                                                 |
| 1089 | 医療法人社団友翔会矢野<br>クリニック     | 164-0001     | 東京都中野区中野3-28-21キャッスル中野1階   | 03-5341-3131 | <a href="http://www.yano-c.jp">http://www.yano-c.jp</a>                                             |                    | ○                  | 内科<br>小児科<br>アレルギー科   | 矢野 貴彦  | 東京警察病院（東京都中野区中野4丁目22-1）・河北総合病院（東京都杉並区阿佐谷北1-7-3） |

電話や情報通信機器を用いて診療を実施する医療機関の一覧（東京都）

|      | 基本情報         |          |                  |              |                                                                                                                     | 事務連絡に基づく対応について     |                    |            |                |                                              |
|------|--------------|----------|------------------|--------------|---------------------------------------------------------------------------------------------------------------------|--------------------|--------------------|------------|----------------|----------------------------------------------|
|      | 施設名          | 郵便番号     | 住所（都道府県から記載）     | 電話番号         | ウェブサイトURL                                                                                                           | 初診の電話等を用いた診療の実施の有無 | 再診の電話等を用いた診療の実施の有無 | 対応診療科      | 担当医師名          | 対面診療が必要と判断した場合に連携する医療機関名（複数ある場合は複数、住所も併せて記載） |
| 1090 | 太田整形外科       | 165-0035 | 東京都中野区白鷺3-15-10  | 03-3310-5216 |                                                                                                                     | ○                  | ○                  | 整形外科       | 太田 信夫          | 河北総合病院                                       |
| 1091 | 小川クリニック      | 165-0034 | 東京都中野区大和町2-46-4  | 03-5327-4664 | <a href="http://www.ogawaclinic.jp/">http://www.ogawaclinic.jp/</a>                                                 | ○                  | ○                  | 内科リウマチ科    | 小川純            |                                              |
| 1092 | 小原病院         | 164-0012 | 東京都中野区本町3-28-16  | 03-3372-0311 | <a href="https://www.obara.or.jp/">https://www.obara.or.jp/</a>                                                     |                    | ○                  | 内科         | 服部 雅俊<br>大石 毅  | みやびハート&ケアクリニック<br>さくらクリニック                   |
| 1093 | かたやま医院       | 164-0003 | 東京都中野区東中野5-23-14 | 03-3227-0603 | <a href="http://www.katayama-iin.com/">http://www.katayama-iin.com/</a>                                             | ○                  | ○                  | 内科<br>小児科  | 方山 栄哲          | 国立国際医療研究センター病院（東京都新宿区戸山1-21-1）               |
| 1094 | かみさぎキッズクリニック | 165-0031 | 東京都中野区上鷺宮3-8-14  | 03-3577-8400 | <a href="http://www.facebook.com/toshiohya">http://www.facebook.com/toshiohya</a>                                   |                    | ○                  | 小児科        | 大谷俊樹           |                                              |
| 1095 | 川島診療所        | 164-0013 | 東京都中野区弥生町3-27-11 | 03-3372-4438 | <a href="http://www.kenyu-kai.or.jp/jigyousyo/kawasima.html">http://www.kenyu-kai.or.jp/jigyousyo/kawasima.html</a> |                    | ○                  | 内科         | 伊藤 洪志          |                                              |
| 1096 | 熊谷医院         | 165-0032 | 東京都中野区鷺宮3-32-5   | 03-3338-1515 | <a href="https://medikuma.com">https://medikuma.com</a>                                                             | ○                  | ○                  | 内科<br>放射線科 | 福島 祥子          |                                              |
| 1097 | クリニックヨコヤマ    | 165-0026 | 東京都中野区新井1-8-8    | 03-3389-2400 | <a href="http://www.t3.rim.or.jp/~drtoshiy/">http://www.t3.rim.or.jp/~drtoshiy/</a>                                 | ○                  | ○                  | 内科         | 横山 敏男<br>野上 周一 |                                              |
| 1098 | 健友会 やまと診療所   | 165-0034 | 東京都中野区大和町3-3-12  | 03-3339-5640 | <a href="http://www.kenyu-kai.or.jp/jigyousyo/yamato.html">http://www.kenyu-kai.or.jp/jigyousyo/yamato.html</a>     |                    | ○                  | 内科         | 神谷 寿美子         |                                              |

電話や情報通信機器を用いて診療を実施する医療機関の一覧（東京都）

|      | 基本情報                       |          |                                |              |                                                                                                                         | 事務連絡に基づく対応について     |                    |                               |                                          |                                              |
|------|----------------------------|----------|--------------------------------|--------------|-------------------------------------------------------------------------------------------------------------------------|--------------------|--------------------|-------------------------------|------------------------------------------|----------------------------------------------|
|      | 施設名                        | 郵便番号     | 住所（都道府県から記載）                   | 電話番号         | ウェブサイトURL                                                                                                               | 初診の電話等を用いた診療の実施の有無 | 再診の電話等を用いた診療の実施の有無 | 対応診療科                         | 担当医師名                                    | 対面診療が必要と判断した場合に連携する医療機関名（複数ある場合は複数、住所も併せて記載） |
| 1099 | 小池小児科医院                    | 165-0033 | 東京都中野区若宮3-2-10                 | 03-3330-0743 | <a href="https://koikech3.wixsite.com/rin-site">https://koikech3.wixsite.com/rin-site</a>                               |                    | ○                  | 小児科                           | 小池 林太郎<br>保崎 智子<br>吉野 浩<br>松本 居子<br>保崎 明 | 立正佼成会付属佼成病院（東京都杉並区和田2-25-1）                  |
| 1100 | さわだ医院                      | 165-0025 | 東京都中野区沼袋4-24-5                 | 03-5318-2526 | <a href="http://sawada-clinic.or.jp">http://sawada-clinic.or.jp</a>                                                     | ○                  | ○                  | 内科<br>小児科                     | 佐和田哲也                                    |                                              |
| 1101 | 耳鼻咽喉科セントラルパーク中野            | 164-0001 | 東京都中野区中野4-10-1中野セントラルパークイースト1F | 03-5318-4187 | <a href="https://centralparknakano-ent.com/index.html">https://centralparknakano-ent.com/index.html</a>                 |                    | ○                  | 耳鼻咽喉科                         | 戸田 恵                                     |                                              |
| 1102 | 社会医療法人社団健友会中野共立病院付属中野共立診療所 | 164-0001 | 東京都中野区中野5-45-4                 | 03-3386-7311 | <a href="http://www.kenyu-kai.or.jp/jigyousyo/nakano_sin.html">http://www.kenyu-kai.or.jp/jigyousyo/nakano_sin.html</a> | ○                  | ○                  | 内科<br>外科<br>整形外科<br>皮膚科<br>眼科 | 梶尾 房枝<br>伊藤 浩一                           |                                              |
| 1103 | 新中野FKクリニック                 | 164-0012 | 東京都中野区本町6-16-12新中野FKビル5F       | 03-3229-2169 | <a href="https://fk-clinic.com/">https://fk-clinic.com/</a>                                                             |                    | ○                  | 精神科/心療内科                      | 藤田憲一                                     | 国立研究開発法人 国立精神・神経医療研究センター病院（東京都小平市小川東町4丁目1-1） |
| 1104 | 新中野内科クリニック                 | 164-0012 | 東京都中野区本町4-45-9ユニバーサルスクエア新中野4F  | 03-6382-5270 | <a href="http://www.shinnakanonaika.jp">http://www.shinnakanonaika.jp</a>                                               |                    | ○                  | 内科<br>消化器内科                   | 佐々木 克行                                   |                                              |
| 1105 | 高田皮膚科クリニック                 | 164-0003 | 東京都中野区東中野2-27-9メテ'イカルコートI-2F   | 03-3366-5620 | <a href="https://www.takada-medical.com/index.html">https://www.takada-medical.com/index.html</a>                       | ○                  | ○                  | 皮膚科                           | 高田 和美                                    |                                              |
| 1106 | たかねファミリークリニック              | 165-0021 | 東京都中野区丸山2-17-13                | 03-5356-8120 | <a href="https://www.takane-clinic.jp/">https://www.takane-clinic.jp/</a>                                               | ○                  | ○                  | 内科<br>小児科<br>皮膚科              | 高根 紘希<br>高根 歩美                           |                                              |
| 1107 | 高橋医院                       | 164-0014 | 東京都中野区南台3-3-3                  | 03-3381-3238 | <a href="https://doctorsfile.jp/h/27495/">https://doctorsfile.jp/h/27495/</a>                                           | ○                  | ○                  | 内科<br>小児科                     | 高橋康男                                     |                                              |

電話や情報通信機器を用いて診療を実施する医療機関の一覧（東京都）

|      | 基本情報                    |          |                              |              |                                           | 事務連絡に基づく対応について     |                    |                                                        |               |                                                          |
|------|-------------------------|----------|------------------------------|--------------|-------------------------------------------|--------------------|--------------------|--------------------------------------------------------|---------------|----------------------------------------------------------|
|      | 施設名                     | 郵便番号     | 住所（都道府県から記載）                 | 電話番号         | ウェブサイトURL                                 | 初診の電話等を用いた診療の実施の有無 | 再診の電話等を用いた診療の実施の有無 | 対応診療科                                                  | 担当医師名         | 対面診療が必要と判断した場合に連携する医療機関名（複数ある場合は複数、住所も併せて記載）             |
| 1108 | たけうち内科                  | 165-0027 | 東京都中野区野方6-8-7岸ビル1階           | 03-5356-5777 | http://t-nogata.com                       | ○                  | ○                  | 内科                                                     | 鈴木良平<br>竹内友朗  |                                                          |
| 1109 | 多田町診療所                  | 164-0014 | 東京都中野区南台3-33-5               | 03-3381-3191 | http://www.tadamachi.or.jp                | ○                  | ○                  | 内科 小児科                                                 | 右近 智雄         |                                                          |
| 1110 | とどろき皮膚科クリニック            | 164-0001 | 東京都中野区中野4-2-1 中野サンキビル5F      | 03-3385-1112 | http://www.todoroki-clinic.com            | ○                  | ○                  | 皮膚科                                                    | 轟 葉子<br>岸本 恵美 |                                                          |
| 1111 | 新渡戸記念中野総合病院             | 164-8607 | 東京都中野区中央4-59-16              | 03-3382-1231 | http://www.nakanosogo.or.jp               |                    | ○<br>※但し処方箋の発行のみ   | 内科<br>脳神経内科<br>小児科<br>外科<br>整形外科<br>皮膚科<br>泌尿器科<br>婦人科 | 各科主治医         |                                                          |
| 1112 | 医療法人社団みやびみやびハート&ケアクリニック | 164-0011 | 東京都中野区中央3-35-4ナビウス新中野1階EAST  | 03-5385-3880 | https://miyabi-heart.jp/                  | ○                  | ○                  | 循環器内科                                                  | 渡邊雅貴          |                                                          |
| 1113 | 武藤耳鼻いんこう科医院             | 164-0003 | 東京都中野区東中野1-35-21             | 03-3361-4023 | https://mutojibi.jp/                      | ○                  | ○                  | 耳鼻咽喉科                                                  | 武藤功太郎         |                                                          |
| 1114 | メディカルコート池田耳鼻咽喉科         | 164-0003 | 東京都中野区東中野2-27-7メディカルコート1202号 | 03-3366-5622 | http://www.e-doctors-net.com/nakano/ikeda | ○                  | ○                  | 耳鼻咽喉科                                                  | 池田美智子 窪田麻子    |                                                          |
| 1115 | やじまクリニック                | 165-0033 | 東京都中野区若宮2-1-23               | 03-3339-1811 |                                           | ○                  | ○                  | 内科<br>小児科                                              | 矢島ふみ子         |                                                          |
| 1116 | やまさき内科クリニック             | 164-0011 | 東京都中野区中央5-39-13 シャトレソレイユ1階   | 03-3380-7777 | https://yamasaki-nakano.jp/               | ○                  | ○                  | 内科                                                     | 山崎 智久<br>山崎 循 | 新渡戸記念中野総合病院(東京都中野区中央4丁目59-16)<br>東京警察病院(東京都中野区中野4丁目22-1) |

電話や情報通信機器を用いて診療を実施する医療機関の一覧（東京都）

|      | 基本情報              |          |                                |               |                                     | 事務連絡に基づく対応について     |                    |                 |              |                                              |
|------|-------------------|----------|--------------------------------|---------------|-------------------------------------|--------------------|--------------------|-----------------|--------------|----------------------------------------------|
|      | 施設名               | 郵便番号     | 住所（都道府県から記載）                   | 電話番号          | ウェブサイトURL                           | 初診の電話等を用いた診療の実施の有無 | 再診の電話等を用いた診療の実施の有無 | 対応診療科           | 担当医師名        | 対面診療が必要と判断した場合に連携する医療機関名（複数ある場合は複数、住所も併せて記載） |
| 1117 | 山田医院              | 164-0001 | 東京都中野区中野2-14-17                | 03-3384-3555  | http://doctorsfile.jp/h/27358/      | ○                  | ○                  | 産婦人科・小児科・内科・皮膚科 | 山田正興・窪田園子    |                                              |
| 1118 | 吉田内科クリニック         | 164-0012 | 東京都中野区本町6-20-17                | 03-53028-2050 | http://www.y-naika.com              |                    | ○                  | 内科              | 吉田慎          |                                              |
| 1119 | 上高田ちば整形外科・小児科     | 164-0002 | 東京都中野区上高田1-8-13メディカルプレイス上高田101 | 03-3228-1555  | http://chiba-cl.net/                | ○                  | ○                  | 内科<br>小児科       | 千葉 智子        | 東京警察病院(東京都中野区中野4丁目22-1)                      |
| 1120 | やはたクリニック          | 165-0034 | 東京都中野区大和町1-44-4                | 03-5364-5361  | https://www.sennenkai.com           | ○                  | ○                  | 内科              | 能戸 幸司        |                                              |
| 1121 | 能戸クリニック           | 165-0034 | 東京都中野区大和町1-45-12               | 03-3337-6700  | https://www.noto-clinic.jp/         | ○                  | ○                  | 内科              | 能戸 保光        |                                              |
| 1122 | あきやま内科クリニック       | 168-0082 | 東京都杉並区久我山3-2-15 A&T HOF 1F     | 03-5336-3301  | http://www.akiyama-naika-clinic.com | ○                  | ○                  | 内科<br>脳神経内科     | 秋山 尚子        |                                              |
| 1123 | あおき眼科             | 166-0002 | 東京都杉並区高円寺北3-20-18              | 03-6231-5148  | http://aokieye@nifty.com            |                    | ○                  | 眼科              | 青木美奈子        | 河北総合病院（東京都杉並区阿佐ヶ谷北1-7-3）                     |
| 1124 | 石井こども・内科循環器科クリニック | 166-0014 | 東京都杉並区松ノ木1-6-21                | 03-3314-5677  | http://www.ishiiclinic.jp/          | ○                  |                    | 内科<br>小児科       | 石井健輔<br>石井哲哉 |                                              |
| 1125 | 石沢クリニック           | 166-0011 | 東京都杉並区梅里2丁目1-15 3階             | 03-5929-1922  |                                     |                    | ○                  | 内科              | 石沢 和敬        | 河北総合病院<br>倭成病院<br>荻窪病院                       |

電話や情報通信機器を用いて診療を実施する医療機関の一覧（東京都）

|      | 基本情報                             |          |                            |              |                                                                                     | 事務連絡に基づく対応について     |                    |                   |                               |                                              |
|------|----------------------------------|----------|----------------------------|--------------|-------------------------------------------------------------------------------------|--------------------|--------------------|-------------------|-------------------------------|----------------------------------------------|
|      | 施設名                              | 郵便番号     | 住所（都道府県から記載）               | 電話番号         | ウェブサイトURL                                                                           | 初診の電話等を用いた診療の実施の有無 | 再診の電話等を用いた診療の実施の有無 | 対応診療科             | 担当医師名                         | 対面診療が必要と判断した場合に連携する医療機関名（複数ある場合は複数、住所も併せて記載） |
| 1126 | 医療法人社団君真光寺田病院                    | 168-0081 | 東京都杉並区宮前5-18-16            | 03-3332-1166 |                                                                                     | ○                  | ○                  | 内科                | 寺田 光男                         | 河北病院（東京都杉並区阿佐谷北1-7-3）荻窪病院（杉並区今川3-1-24）       |
| 1127 | 医療法人社団こぎつね会<br>ふるはた医院            | 167-0022 | 東京都杉並区下井草4-16-2            | 03-5930-9119 |                                                                                     | ○                  | ○                  | 眼科小児科             | 古旗茂                           |                                              |
| 1128 | 医療法人社団勝榮会<br>いりたに内科クリニック         | 168-0063 | 東京都杉並区和泉4-51-6フォンティエヌ杉並1階  | 03-5305-5788 | <a href="https://www.iritani.jp/">https://www.iritani.jp/</a>                       | ○                  | ○                  | 内科                | 入谷栄一<br>山本浩隆<br>大滝美浩<br>塩塚有希子 |                                              |
| 1129 | 医療法人社団千紀会 吉<br>田クリニック            | 167-0043 | 東京都杉並区上荻1-18-12 春木家ビル2階    | 03-5347-7300 | <a href="http://www.yoshidacl.com/">http://www.yoshidacl.com/</a>                   | ○                  | ○                  | 内科                | 吉田 克彦                         | 荻窪病院（東京都杉並区今川3-1-24）                         |
| 1130 | 医療法人社団奏友会<br>あんずクリニック            | 166-0011 | 東京都杉並区梅里1-7-15 3階          | 03-5305-3358 | <a href="http://www.tubomi.co.jp/index.html">http://www.tubomi.co.jp/index.html</a> | ○                  | ○                  | 内科<br>心療内科<br>精神科 | 児島 直樹<br>古田 伸夫                |                                              |
| 1131 | 医療法人社団ちぎら医院                      | 167-0042 | 東京都杉並区西荻北3-4-4             | 03-3390-1238 | <a href="https://www.hospita.jp/detail/145/">https://www.hospita.jp/detail/145/</a> | ○                  | ○                  | 内科<br>小児科         | 千木良淳                          |                                              |
| 1132 | 医療法人社団はなぶさ会<br>しんえい糖健診クリニッ<br>ク  | 166-0003 | 東京都杉並区高円寺南4-6-7アンフィニビル3F   | 03-6383-1870 | <a href="https://shinei-cl.com">https://shinei-cl.com</a>                           |                    | ○                  | 内科                | 永松 信哉                         |                                              |
| 1133 | 医療法人社団フロンティ<br>アーツ 井草内科クリ<br>ニック | 167-0021 | 東京都杉並区井草3-17-14サイレンスミヨシ101 | 03-5311-7077 | <a href="https://igusa-naika.jp/">https://igusa-naika.jp/</a>                       | ○                  | ○                  | 内科                | 川瀬 直登                         |                                              |
| 1134 | 医療法人社団碩和会下平<br>レディースクリニック        | 166-0003 | 東京都杉並区高円寺南1-4-12           | 03-5377-0834 | <a href="https://www.shimodaira-ladies.com/">https://www.shimodaira-ladies.com/</a> | ○                  | ○                  | 婦人科・産婦人<br>科      | 中島 由美子                        | 東京女子医科大学病院（東京都新宿区市谷河和田町）                     |

電話や情報通信機器を用いて診療を実施する医療機関の一覧（東京都）

|      | 基本情報                      |          |                                   |              |                                                                               | 事務連絡に基づく対応について     |                    |                   |                      |                                              |
|------|---------------------------|----------|-----------------------------------|--------------|-------------------------------------------------------------------------------|--------------------|--------------------|-------------------|----------------------|----------------------------------------------|
|      | 施設名                       | 郵便番号     | 住所（都道府県から記載）                      | 電話番号         | ウェブサイトURL                                                                     | 初診の電話等を用いた診療の実施の有無 | 再診の電話等を用いた診療の実施の有無 | 対応診療科             | 担当医師名                | 対面診療が必要と判断した場合に連携する医療機関名（複数ある場合は複数、住所も併せて記載） |
| 1135 | 医療法人 靖和会 林脳神経外科メディカルクリニック | 166-0004 | 東京都杉並区阿佐谷南1-9-2 GOOD地下1階・1階       | 03-5305-8831 | <a href="https://hayashi-noushinkei.com/">https://hayashi-noushinkei.com/</a> | ○                  | ○                  | 内科<br>脳神経外科       | 林 靖人 森原啓文 井上 剛 増淵 充世 | 河北総合病院（東京都杉並区阿佐谷北1-7-3）                      |
| 1136 | 内山クリニック                   | 168-0063 | 東京都杉並区和泉3丁目6-2 プラムビル1F            | 03-5355-3535 | <a href="http://www.uchiyama-clin.com/">http://www.uchiyama-clin.com/</a>     | ○                  | ○                  | 内科<br>小児科         | 内山 克己                |                                              |
| 1137 | 永福町駅前みんなのクリニック            | 1680063  | 東京都杉並区和泉3-4-7                     | 03-3324-1000 | eifukucho.minna@gmail.com                                                     | ○                  | ○                  | 内科 外科<br>小児科 小児外科 | 奥村 尚威                |                                              |
| 1138 | おおにし眼科                    | 167-0053 | 東京都杉並区西荻南2-24-15藤和シティホームズ西荻窪駅前102 | 03-5941-2450 | <a href="http://ohnishi-eye.jp">http://ohnishi-eye.jp</a>                     |                    | ○                  | 眼科                | 大西智子                 | 荻窪病院                                         |
| 1139 | 海老沢医院                     | 167-0021 | 東京都杉並区井草3-24-8                    | 03-3390-1289 |                                                                               |                    | ○                  | 内科 小児科<br>皮膚科     | 海老澤俊浩                |                                              |
| 1140 | 大宮の杜小児醫院                  | 168-0064 | 東京都杉並区永福4-19-3                    | 03-6379-5360 |                                                                               | ○                  | ○                  | 小児科               | 近田 照己                | 河北総合病院（東京都杉並区阿佐谷北1-7-3）                      |
| 1141 | 荻窪かえでクリニック                | 167-0051 | 東京都杉並区荻窪5-27-5 中島第2ビル3階301号室      | 03-6279-9894 | <a href="http://www.ogikubo-kaede-cl.com">http://www.ogikubo-kaede-cl.com</a> | ○                  | ○                  | 内科・胃腸内科・外科        | 北山尚也                 | 荻窪病院（東京都杉並区今川3-1-24）                         |
| 1142 | 柿田医院                      | 167-0022 | 東京都杉並区下井草2-23-5                   | 03-3395-3602 | <a href="http://www.kakita-clinic.com/">http://www.kakita-clinic.com/</a>     | ○                  | ○                  | 内科<br>小児科         | 柿田 豊                 |                                              |
| 1143 | 久我山レディースクリニック             | 168-0082 | 東京都杉並区久我山2-14-8                   | 03-3331-3010 | <a href="https://www.kugayama-lc.com">https://www.kugayama-lc.com</a>         |                    | ○                  | 産婦人科<br>皮膚科       | 青木 啓光<br>青木 明恵       |                                              |

電話や情報通信機器を用いて診療を実施する医療機関の一覧（東京都）

|      | 基本情報                     |          |                                |              |                               | 事務連絡に基づく対応について     |                    |                             |                          |                                                                                                           |
|------|--------------------------|----------|--------------------------------|--------------|-------------------------------|--------------------|--------------------|-----------------------------|--------------------------|-----------------------------------------------------------------------------------------------------------|
|      | 施設名                      | 郵便番号     | 住所（都道府県から記載）                   | 電話番号         | ウェブサイトURL                     | 初診の電話等を用いた診療の実施の有無 | 再診の電話等を用いた診療の実施の有無 | 対応診療科                       | 担当医師名                    | 対面診療が必要と判断した場合に連携する医療機関名（複数ある場合は複数、住所も併せて記載）                                                              |
| 1144 | 窪田クリニック                  | 166-0002 | 東京都杉並区高円寺北3-25-20              | 03-6265-5791 | http://www.sugi-kubota.com    | ○                  | ○                  | 内科・外科<br>婦人科                | 窪田 茂比古<br>下村 浩祐<br>下村 貴子 |                                                                                                           |
| 1145 | 木暮クリニック                  | 168-0073 | 東京都杉並区下高井戸1-4-1-6上北沢森ビル1F      | 03-3329-3003 | http://www.kogure-clinic.com  |                    | ○                  | 内科                          | 木暮 大嗣                    |                                                                                                           |
| 1146 | 近藤医院                     | 167-0022 | 東京都杉並区下井草2-36-24               | 03-3397-6868 |                               | ○                  | ○                  | 内科<br>小児科                   | 近藤慶幸 邦夫                  |                                                                                                           |
| 1147 | 佐々木内科・循環器内科<br>クリニック     | 166-0016 | 東京都杉並区成田西2-11-6                | 03-5335-7121 | http://sasaki-clinic.flips.jp |                    | ○                  | 内科<br>循環器内科                 | 佐々木 英樹                   |                                                                                                           |
| 1148 | 佐藤眼科医院                   | 167-0051 | 東京都杉並区荻窪5-17-20                | 03-3393-1726 |                               |                    | ○                  | 眼科                          | 石川実佐子                    |                                                                                                           |
| 1149 | 耳鼻咽喉科・小児耳鼻咽喉科<br>宮崎クリニック | 168-0063 | 東京都杉並区和泉3-4-7永福町駅前クリニックモール2階   | 03-3322-1110 | https://miyazaki-ori.com      | ○                  | ○                  | 耳鼻咽喉科                       | 宮崎日出海                    |                                                                                                           |
| 1150 | 松庵内科クリニック                | 167-0054 | 東京都杉並区松庵2-7-11櫻井ビル1階           | 03-5370-2006 | http://shouannaika.jp/        | ○                  | ○                  | 内科                          | 千葉琢哉                     | 松庵内科クリニック（東京都杉並区松庵2-7-11櫻井ビル1階）                                                                           |
| 1151 | 白い鳥医院                    | 168-0062 | 東京都杉並区方南2-23-9モナークマンション方南町1F-A | 03-5307-8733 | https://shiroitori-iin.jp     |                    | ○                  | 耳鼻科<br>内科                   | 堀 夏樹<br>堀みどり             | 立正佼成会更正病院（東京都杉並区）                                                                                         |
| 1152 | 杉並すだクリニック                | 167-0021 | 東京都杉並区井草1-16-4                 | 03-3395-1192 | http://suginami-suda.com      | ○                  | ○                  | 内科<br>循環器内科<br>心臓血管外科<br>外科 | 須田 優司                    | 荻窪病院（東京都杉並区今川3-1-24）<br>河北総合病院（東京都杉並区阿佐谷北1-7-3）<br>順天堂大学練馬病院（東京都練馬区高野台3-1-10）<br>東京医科大学病院（東京都新宿区西新宿6-7-1） |



電話や情報通信機器を用いて診療を実施する医療機関の一覧（東京都）

|      | 基本情報              |          |                                  |              |                                                                                            | 事務連絡に基づく対応について     |                    |                                   |               |                                                              |
|------|-------------------|----------|----------------------------------|--------------|--------------------------------------------------------------------------------------------|--------------------|--------------------|-----------------------------------|---------------|--------------------------------------------------------------|
|      | 施設名               | 郵便番号     | 住所（都道府県から記載）                     | 電話番号         | ウェブサイトURL                                                                                  | 初診の電話等を用いた診療の実施の有無 | 再診の電話等を用いた診療の実施の有無 | 対応診療科                             | 担当医師名         | 対面診療が必要と判断した場合に連携する医療機関名（複数ある場合は複数、住所も併せて記載）                 |
| 1153 | 杉並区夜間急病診療所        | 167-0051 | 東京都杉並区荻窪5-20-1                   | 03-3391-1599 |                                                                                            | ○                  | ○                  | 小児科 内科<br>外科 耳鼻科                  | 当番医           |                                                              |
| 1154 | 杉並堀ノ内クリニック        | 166-0013 | 東京都杉並区堀ノ内2-29-14ライオンズマンション新高円寺1階 | 03-5929-1611 | <a href="https://www.sugihori.com/">https://www.sugihori.com/</a>                          |                    | ○                  | 内科・小児科・<br>皮膚科・整形外科<br>科・耳鼻科・泌尿器科 |               |                                                              |
| 1155 | すずかわ循環器内科         | 168-0063 | 東京都杉並区和泉3-46-6                   | 03-5300-2200 | <a href="https://suzukawa-clinic.jp/">https://suzukawa-clinic.jp/</a>                      | ○                  | ○                  | 内科 循環器内<br>科 糖尿病・脂<br>質代謝内科       | 鈴木 満雄         |                                                              |
| 1156 | せいきょう診療所          | 166-0014 | 東京都杉並区松ノ木3-23-8                  | 03-3313-7365 | <a href="http://www.seikyou-clinic.com">http://www.seikyou-clinic.com</a>                  | ○                  | ○                  | 内科<br>小児科                         | 湯浅 潤子         | 河北総合病院（東京都杉並区阿佐谷北1-7-3）                                      |
| 1157 | 高井戸子どもクリニック       | 168-0071 | 東京都杉並区高井戸西1-27-22                | 03-3331-6644 |                                                                                            | ○                  | ○                  | 内科<br>小児科                         | 柳垣 繁<br>柳垣 優江 | 河北総合病院（東京都杉並区阿佐谷北1-7-3）                                      |
| 1158 | 滝澤医院              | 168-0064 | 東京都杉並区永福2-12-10                  | 03-3328-5316 | <a href="mailto:eifuku-takizawa.cl@fb4.sonet.ne.jp">eifuku-takizawa.cl@fb4.sonet.ne.jp</a> |                    | ○                  | 内科<br>小児科                         | 滝澤 誠          |                                                              |
| 1159 | 多田小児クリニック         | 166-0012 | 東京都杉並区和田1-19-5 新村ビル1階            | 03-3380-0415 | <a href="http://tada-kids.jp">http://tada-kids.jp</a>                                      |                    | ○                  | 小児科                               | 多田 光          |                                                              |
| 1160 | 東京ビジョンアイクリニック阿佐ヶ谷 | 166-0004 | 東京都杉並区阿佐谷南3-58-1 ビーンズ阿佐ヶ谷1F      | 03-6383-0238 | <a href="https://tokyo2020vision.com/asagaya/">https://tokyo2020vision.com/asagaya/</a>    |                    | ○                  | 眼科                                | 井手武           | 河北総合病院<br>（東京都杉並区阿佐谷北1-7-3）                                  |
| 1161 | なかがわ内科クリニック       | 167-0021 | 東京都杉並区井草1-2-5ワイズスクエア101          | 03-5311-5577 | <a href="http://www.nakagawanaika.com">http://www.nakagawanaika.com</a>                    |                    | ○                  | 内科                                | 中川靖章          | 荻窪病院（東京都杉並区今川3-1-24）<br>なかがわ内科クリニック（東京都杉並区井草1-2-5ワイズスクエア101） |

電話や情報通信機器を用いて診療を実施する医療機関の一覧（東京都）

|      | 基本情報                |          |                           |              |                                                                                       | 事務連絡に基づく対応について     |                    |                       |                          |                                                                             |
|------|---------------------|----------|---------------------------|--------------|---------------------------------------------------------------------------------------|--------------------|--------------------|-----------------------|--------------------------|-----------------------------------------------------------------------------|
|      | 施設名                 | 郵便番号     | 住所（都道府県から記載）              | 電話番号         | ウェブサイトURL                                                                             | 初診の電話等を用いた診療の実施の有無 | 再診の電話等を用いた診療の実施の有無 | 対応診療科                 | 担当医師名                    | 対面診療が必要と判断した場合に連携する医療機関名（複数ある場合は複数、住所も併せて記載）                                |
| 1162 | 長沼内科                | 166-0015 | 東京都杉並区成田東3-36-8           | 03-3311-1803 |                                                                                       |                    | ○                  | 内科<br>小児科             | 長沼裕一郎                    | 河北総合病院(東京都杉並区阿佐谷北)                                                          |
| 1163 | 西荻窪診療所              | 167-0053 | 東京都杉並区西荻南4-2-7            | 03-3333-5434 | <a href="http://www.kenyu-kai.or.jp">http://www.kenyu-kai.or.jp</a>                   |                    | ○                  | 内科                    | 澤田 玲                     |                                                                             |
| 1164 | ニューハート・ワタナベ国際病院     | 168-0065 | 東京都杉並区浜田山3-19-11          | 03-3311-1119 | <a href="http://newheart.jp">http://newheart.jp</a>                                   | ○                  | ○                  | 心臓血管外科<br>循環器内科       | 渡邊 剛<br>石川 紀彦<br>その他各科医師 |                                                                             |
| 1165 | はっとり整形外科・リウマチ科クリニック | 167-0021 | 東京都杉並区井草5-6-3             | 03-4285-9807 | <a href="https://hattori-seikei.com/">https://hattori-seikei.com/</a>                 | ○                  | ○                  | 整形外科<br>リウマチ科         | 服部宏行                     |                                                                             |
| 1166 | 浜田山病院               | 168-0065 | 東京都杉並区浜田山4-1-8            | 03-3311-1195 | <a href="http://www.hamadayama.or.jp">http://www.hamadayama.or.jp</a>                 |                    | ○                  | 整形外科<br>内科            | 小瀬 忠男<br>井上 啓造           |                                                                             |
| 1167 | 人見クリニック             | 168-0072 | 東京都杉並区高井戸東3-16-25         | 03-5370-2166 | <a href="https://www.hitomiclinic.com/">https://www.hitomiclinic.com/</a>             | ○                  | ○                  | 内科/循環器内科<br>小児科/脳神経外科 | 橋木 治<br>橋木 優哉<br>小児科担当医  |                                                                             |
| 1168 | 淵之上クリニック            | 167-0033 | 東京都杉並区清水1-15-12ローカス四面道 1F | 03-5382-0876 |                                                                                       | ○                  | ○                  | 内科<br>小児科             | 淵之上 眞澄                   | 荻窪病院(東京都杉並区今川3丁目1-24)河北総合病院(東京都杉並区阿佐ヶ谷北1丁目7-3)東京衛生アドベンチスト病院(東京都杉並区天沼3-17-3) |
| 1169 | 方南町胃腸内科・内視鏡クリニック    | 168-0062 | 東京都杉並区方南2-19-2 鈴力第三ビル3階   | 03-3317-0311 | <a href="https://www.honancho-ge-clinic.com/">https://www.honancho-ge-clinic.com/</a> | ○                  | ○                  | 内科<br>胃腸内科            | 辻 昌孝                     |                                                                             |
| 1170 | 方南町さくらクリニック         | 168-0062 | 東京都杉並区方南2-20-5鈴力第2ビル1階    | 03-3315-1315 | <a href="http://honancho-clinic.com/">http://honancho-clinic.com/</a>                 | ○                  | ○                  | 内科                    | 辻 綾子                     |                                                                             |

電話や情報通信機器を用いて診療を実施する医療機関の一覧（東京都）

|      | 基本情報          |          |                           |              |                                                                                                                                                     | 事務連絡に基づく対応について     |                    |                           |                           |                                                                           |
|------|---------------|----------|---------------------------|--------------|-----------------------------------------------------------------------------------------------------------------------------------------------------|--------------------|--------------------|---------------------------|---------------------------|---------------------------------------------------------------------------|
|      | 施設名           | 郵便番号     | 住所（都道府県から記載）              | 電話番号         | ウェブサイトURL                                                                                                                                           | 初診の電話等を用いた診療の実施の有無 | 再診の電話等を用いた診療の実施の有無 | 対応診療科                     | 担当医師名                     | 対面診療が必要と判断した場合に連携する医療機関名（複数ある場合は複数、住所も併せて記載）                              |
| 1171 | マキ皮膚科クリニック    | 166-0015 | 東京都杉並区成田東1-49-7-201       | 03-3314-7775 | <a href="http://www.maki-derma.com">http://www.maki-derma.com</a>                                                                                   |                    | ○                  | 皮膚科                       | 川名 万季                     |                                                                           |
| 1172 | 宮下小児科医院       | 166-0016 | 東京都杉並区成田西3-20-3           | 03-3392-3855 |                                                                                                                                                     |                    | ○                  | 小児科                       | 佐々木 礼子                    |                                                                           |
| 1173 | むらい浜田山クリニック   | 168-0072 | 東京都杉並区高井戸東4-27-17         | 03-5370-2222 | <a href="https://murai.clinic/">https://murai.clinic/</a>                                                                                           | ○                  | ○                  | 内科                        | 村井 謙治                     |                                                                           |
| 1174 | 山本クリニック       | 167-0021 | 東京都杉並区井草1-8-9アセット下井草100号室 | 03-3301-7856 | <a href="https://www.yamamoto-clip.jp/">https://www.yamamoto-clip.jp/</a>                                                                           | ○                  | ○                  | 内科                        | 山本クリニック                   | 河北総合病院（東京都杉並区阿佐谷北1-7-3）<br>荻窪病院（東京都杉並区今川3-1-24）<br>東京警察病院（東京都中野区中野4-22-1） |
| 1175 | よしだ内科         | 166-0003 | 東京都杉並区高円寺南4-19-1山長ビル1F    | 03-3311-3293 | <a href="http://yoshida-naika.net/">http://yoshida-naika.net/</a>                                                                                   | ○                  | ○                  | 内科<br>小児科                 | 芳田 工                      | 河北総合病院                                                                    |
| 1176 | 和田クリニック       | 166-0012 | 東京都杉並区和田3-15-15           | 03-3381-5411 | <a href="http://www.sgn.tokyo.med.or.jp/search/detail.php?code=8&amp;no=277">http://www.sgn.tokyo.med.or.jp/search/detail.php?code=8&amp;no=277</a> | ○                  | ○                  | 内科<br>脳神経外科               | 下山一郎                      | 佼成病院（東京都杉並区和田2-25-1）<br>東京警察病院（東京都中野区中野4-22-1）<br>河北総合病院（東京都杉並区阿佐ヶ谷1-7-3） |
| 1177 | ファインクリニック西荻南  | 167-0053 | 東京都杉並区西荻南1-1-101          | 03-5941-3916 | <a href="https://fine-clinic-nishiogiminami.com">https://fine-clinic-nishiogiminami.com</a>                                                         | ○                  | ○                  | 内科、呼吸器内科、循環器内科、消化器内科、泌尿器科 | 園田唯<br>宮部彰<br>佐藤達也<br>齋木寛 |                                                                           |
| 1178 | アイビー大腸肛門クリニック | 170-0002 | 東京都豊島区巢鴨1-18-10 4F        | 03-5940-5811 | <a href="https://ivyclinic.jp/">https://ivyclinic.jp/</a>                                                                                           |                    | ○                  | 肛門科、胃腸科                   | 山田麻子、寺田俊明 他               |                                                                           |
| 1179 | あずま通りクリニック    | 171-0022 | 東京都豊島区南池袋3-18-34-101      | 03-3982-7203 |                                                                                                                                                     | ○                  | ○                  | 内科<br>小児科                 | 久保                        | 東京都立大塚病院（東京都豊島区南大塚2-8-1）                                                  |

電話や情報通信機器を用いて診療を実施する医療機関の一覧（東京都）

|      | 基本情報             |          |                                 |              |                                   | 事務連絡に基づく対応について     |                    |                      |                         |                                                              |
|------|------------------|----------|---------------------------------|--------------|-----------------------------------|--------------------|--------------------|----------------------|-------------------------|--------------------------------------------------------------|
|      | 施設名              | 郵便番号     | 住所（都道府県から記載）                    | 電話番号         | ウェブサイトURL                         | 初診の電話等を用いた診療の実施の有無 | 再診の電話等を用いた診療の実施の有無 | 対応診療科                | 担当医師名                   | 対面診療が必要と判断した場合に連携する医療機関名（複数ある場合は複数、住所も併せて記載）                 |
| 1180 | 吾妻医院             | 171-0051 | 東京都豊島区長崎6-2-12                  | 03-3957-5502 | http://www.azuma-clinic.jp        |                    | ○                  | 内科<br>麻酔科            | 遠藤 正之                   |                                                              |
| 1181 | 荒木医院             | 171-0031 | 東京都豊島区目白3-6-4                   | 03-3953-4006 |                                   | ○                  | ○                  | 内科                   | 荒木 崇                    |                                                              |
| 1182 | アルパカ小児科耳鼻科クリニック  | 171-0052 | 東京都豊島区南長崎4-5-20<br>アイテラス落合南長崎3階 | 03-3565-6639 | https://alpaca-kodomo.com/        | ○                  | ○                  | 小児科<br>耳鼻科<br>アレルギー科 | 西野 多聞<br>吉田 智恵<br>藤原 摩耶 |                                                              |
| 1183 | あんこうメディカルクリニック   | 171-0021 | 東京都豊島区西池袋1-17-10 エキニア池袋7階       | 03-3971-9941 | http://ankoh.jp                   |                    | ○                  | 内科<br>消化器内科科         | 安康 晴博                   |                                                              |
| 1184 | 池袋大谷クリニック        | 171-0021 | 東京都豊島区西池袋1-39-4                 | 03-3986-0337 | https://otani-clinic.com          | ○                  | ○                  | 呼吸器内科                | 大谷義夫                    |                                                              |
| 1185 | 池袋オーリーブメンタルクリニック | 1700013  | 東京都豊島区東池袋1-4-4-1 5 ブランドール2階     | 03-6914-0709 | https://iomc.jp/                  |                    | ○                  | 精神科<br>心療内科          | 松島幸恵                    |                                                              |
| 1186 | 池袋こころのクリニック      | 171-0022 | 東京都豊島区南池袋2-27-2<br>マルグリットビル4F   | 03-5985-7781 | http://www.ikebukuro-kokoro.com   |                    | ○                  | 精神科<br>心療内科          | 横山 雄二                   |                                                              |
| 1187 | 池袋さゆり眼科          | 170-0013 | 東京都豊島区東池袋1-10-1住友池袋駅前ビル2階       | 03-5962-0656 | https://www.sayuri-eyeclinic.com/ | ○                  | ○                  | 眼科                   | 藤井さゆり                   |                                                              |
| 1188 | 池袋サンシャイン通り眼科診療所  | 170-0013 | 東京都豊島区東池袋1-5-6 アイケアビル5階         | 03-3981-6363 | http://www.shec.jp/               |                    | ○                  | 眼科                   | 堀 好子<br>本間 慶            | 日本大学医学部附属板橋病院（東京都板橋区大谷口上町30-1）<br>東京都立大塚病院眼科（東京都豊島区南大塚2-8-1） |

電話や情報通信機器を用いて診療を実施する医療機関の一覧（東京都）

|      | 基本情報                   |          |                                       |              |                                         | 事務連絡に基づく対応について     |                    |                                 |                                 |                                                         |
|------|------------------------|----------|---------------------------------------|--------------|-----------------------------------------|--------------------|--------------------|---------------------------------|---------------------------------|---------------------------------------------------------|
|      | 施設名                    | 郵便番号     | 住所（都道府県から記載）                          | 電話番号         | ウェブサイトURL                               | 初診の電話等を用いた診療の実施の有無 | 再診の電話等を用いた診療の実施の有無 | 対応診療科                           | 担当医師名                           | 対面診療が必要と判断した場合に連携する医療機関名（複数ある場合は複数、住所も併せて記載）            |
| 1189 | 池袋スリープケアクリニック          | 171-0022 | 東京都豊島区南池袋3-14-11 中町ビル1階               | 03-5956-3838 | https://www.sleep-care.jp               |                    | ○                  | 呼吸器内科（当院CPAP処方患者の定期受診に限る）       | 金子 泰之                           |                                                         |
| 1190 | 池袋東口まめクリニック            | 170-0013 | 東京都豊島区東池袋1-42-12ステーションサイドビル3階         | 03-6915-2472 | https://mame-clinic.jp/                 | ○                  | ○                  | 内科                              | 石川 雅俊                           | JCHO東京新宿メディカルセンター/東京通信病院/日本大学病院/順天堂大学医学部附属順天堂医院/三井記念病院等 |
| 1191 | 池袋メトロポリタンクリニック         | 171-0021 | 東京都豊島区西池袋1-11-1 メトロポリタンプラザビル(ルミネ) 10F | 03-5954-1266 | http://www.metropolitan-clinic.com      |                    | ○                  | 内科<br>婦人科                       | 沼田 明<br>玉岡 有告                   |                                                         |
| 1192 | 医療法人社団櫻和会櫻和メンタルクリニック   | 170-0002 | 東京都豊島区巣鴨1-19-12八木下ビル2階・3階             | 03-5319-1908 | http://www.ohwa-mental.jp               |                    | ○                  | 精神科・児童精神科                       | 山野かおる 里村あゆみ 松本倫子 鈴木美央 涌水良晃 鈴木淑子 |                                                         |
| 1193 | 医) 求林会 クリニック 西川        | 170-0005 | 東京都豊島区南大塚2-4 5-9 ヤマナカヤビル1階            | 03-5395-0721 | https://clinic-nishikawa.com            |                    | ○                  | 精神科<br>心療内科                     | 西川嘉伸                            |                                                         |
| 1194 | 医療法人社団求林会池袋クリスタル眼科     | 171-8557 | 東京都豊島区南大塚1-2 8-2 池袋バルコ7階              | 03-3988-2388 | https://www.ikebukuro-crystal-ganka.jp  |                    | ○                  | 眼科                              | 一戸 唱<br>西川啓子                    |                                                         |
| 1195 | 医療法人社団 明善会 榎本クリニック     | 171-0021 | 東京都豊島区西池袋1-2-5                        | 03-3982-5321 | http://www.enomoto-clinic.jp/           |                    | ○                  | 精神科                             | 深間内 文彦                          |                                                         |
| 1196 | 医療法人社団 明善会 新大塚榎本クリニック  | 170-0005 | 東京都豊島区南大塚3-11-9                       | 03-6907-8061 | http://www.shinotsuka-enomoto-clinic.jp |                    | ○                  | 精神科                             | 松田 隆夫                           |                                                         |
| 1197 | 医療法人社団 環桜会 巣鴨さくらなみき皮膚科 | 170-0002 | 東京都豊島区巣鴨2-5-12 真野ビル3F                 | 03-3917-1241 | https://sakuranamiki-hifuka.jp/         |                    | ○                  | 皮膚科<br>小児皮膚科<br>アレルギー科<br>美容皮膚科 | 鈴木 さやか                          |                                                         |

電話や情報通信機器を用いて診療を実施する医療機関の一覧（東京都）

|      | 基本情報                           |          |                                            |              |                                                                                                                  | 事務連絡に基づく対応について     |                    |                        |               |                                                                                                                                                                       |
|------|--------------------------------|----------|--------------------------------------------|--------------|------------------------------------------------------------------------------------------------------------------|--------------------|--------------------|------------------------|---------------|-----------------------------------------------------------------------------------------------------------------------------------------------------------------------|
|      | 施設名                            | 郵便番号     | 住所（都道府県から記載）                               | 電話番号         | ウェブサイトURL                                                                                                        | 初診の電話等を用いた診療の実施の有無 | 再診の電話等を用いた診療の実施の有無 | 対応診療科                  | 担当医師名         | 対面診療が必要と判断した場合に連携する医療機関名（複数ある場合は複数、住所も併せて記載）                                                                                                                          |
| 1198 | 医療法人社団康英会<br>池袋ユナイテッドクリ<br>ニック | 171-0021 | 東京都豊島区西池袋1-28-7ニイミビル7階                     | 03-6907-1942 | <a href="https://united-clinic.jp/">https://united-clinic.jp/</a>                                                |                    | ○                  | 内科<br>自由診療<br>(ED・AGA) | 細田 淳英         | 横浜ユナイテッドクリニック<br>221-0835神奈川県横浜市神奈川区鶴屋町2-22-4<br>第七浅川ビル4階A室<br>ユナイテッドクリニック新宿西口院<br>160-0023東京都新宿区西新宿7-1-10守矢ビル8階<br>ユナイテッドクリニック渋谷駅前院<br>150-0043東京都渋谷区道玄坂2-30-4玉久ビル4階 |
| 1199 | 医療法人社団さかもと会<br>くにやクリニック        | 170-0005 | 東京都豊島区南大塚2-37-11 ハイムセクオアイ<br>101           | 03-5319-0873 | <a href="https://kuniya.org">https://kuniya.org</a>                                                              | ○                  | ○                  | 内科 アレル<br>ギー科          | 小泉久仁弥         |                                                                                                                                                                       |
| 1200 | 医療法人社団朱紡会<br>巣鴨レディースクリニッ<br>ク  | 112-0001 | 東京都豊島区巣鴨2-5-12 真野ビル2階                      | 03-3916-2262 | <a href="https://sugamo-lc.jp/">https://sugamo-lc.jp/</a>                                                        |                    | ○                  | 産婦人科                   | 花田 佐知子        |                                                                                                                                                                       |
| 1201 | 医療法人社団尚香会なか<br>い耳鼻咽喉科          | 171-0021 | 東京都豊島区西池袋5-5-21ザ・タワーグラン<br>ディア2階池袋クリニックモール | 03-5960-4133 | <a href="http://www.clinic-mall.jp/ikebukuro/nakai.html">http://www.clinic-<br/>mall.jp/ikebukuro/nakai.html</a> |                    | ○                  | 耳鼻咽喉科                  | 中井孝尚、中井<br>百香 |                                                                                                                                                                       |
| 1202 | 医療法人社団昭日会 後<br>藤クリニック          | 170-0013 | 東京都豊島区東池袋2-45-4 メロス学園ビル1階                  | 03-5928-0510 | <a href="http://www.gotoh-clinic.jp/">http://www.gotoh-clinic.jp/</a>                                            | ○                  | ○                  | 内科<br>小児科<br>皮膚科       | 後藤昭子<br>後藤伊織  |                                                                                                                                                                       |
| 1203 | 医療法人社団昭日会 山<br>下医院             | 170-0013 | 東京都豊島区東池袋2-11-8 1階                         | 03-3971-4994 | <a href="http://www.yamashita-iin.or.jp/">http://www.yamashita-<br/>iin.or.jp/</a>                               | ○                  | ○                  | 内科<br>小児科<br>皮膚科       | 後藤伊織<br>後藤昭子  |                                                                                                                                                                       |
| 1204 | 医療法人社団仁泉会とし<br>ま昭和病院           | 171-0052 | 東京都豊島区南長崎5丁目17番9号                          | 03-3953-5555 |                                                                                                                  |                    | ○                  | 内科                     | 大部 雅英         |                                                                                                                                                                       |
| 1205 | 医療法人社団瑞幸会<br>千川篠田整形外科          | 171-0043 | 東京都豊島区要町3-13-8                             | 03-3959-4114 |                                                                                                                  |                    | ○                  | 整形外科                   | 篠田 瑞生         |                                                                                                                                                                       |
| 1206 | 医療法人社団のぞみ会<br>スガモ駅前整形外科        | 170-0002 | 東京都豊島区巣鴨1-14-3 藤ビル2階                       | 03-6912-0318 | <a href="https://www.sugamo-ekimae-cl.com/">https://www.sugamo-ekimae-<br/>cl.com/</a>                           |                    | ○                  | 整形外科                   | 近見 仁          |                                                                                                                                                                       |

電話や情報通信機器を用いて診療を実施する医療機関の一覧（東京都）

|      | 基本情報         |          |                             |              |                                                                                                                     | 事務連絡に基づく対応について     |                    |                  |               |                                              |
|------|--------------|----------|-----------------------------|--------------|---------------------------------------------------------------------------------------------------------------------|--------------------|--------------------|------------------|---------------|----------------------------------------------|
|      | 施設名          | 郵便番号     | 住所（都道府県から記載）                | 電話番号         | ウェブサイトURL                                                                                                           | 初診の電話等を用いた診療の実施の有無 | 再診の電話等を用いた診療の実施の有無 | 対応診療科            | 担当医師名         | 対面診療が必要と判断した場合に連携する医療機関名（複数ある場合は複数、住所も併せて記載） |
| 1207 | 鶴木耳鼻咽喉科医院    | 171-0051 | 東京都豊島区長崎5-33-10             | 03-3957-4720 | <a href="https://www.unoki-jibiinkouka.com">https://www.unoki-jibiinkouka.com</a>                                   | ○                  | ○                  | 耳鼻咽喉科<br>小児耳鼻咽喉科 | 新井 美帆         |                                              |
| 1208 | 江戸橋診療所       | 170-0002 | 東京都豊島区巣鴨4-4-8               | 03-3918-1768 |                                                                                                                     | ○                  | ○                  | 内科<br>小児科        | 山崎泰行          |                                              |
| 1209 | 及川醫院         | 170-0002 | 東京都豊島区巣鴨1-40-5-2階           | 03-3945-9270 | <a href="https://www.oikawaiin.info/">https://www.oikawaiin.info/</a>                                               |                    | ○                  | 内科<br>小児科        | 及川            |                                              |
| 1210 | 大沢眼科         | 170-6007 | 東京都豊島区東池袋3-1-1サンシャイン60ビル7階  | 03-3988-3333 | <a href="http://www.osawaganka.jp/">http://www.osawaganka.jp/</a>                                                   | ○                  | ○                  | 眼科               | 大澤 彰          | 大沢眼科（東京都豊島区東池袋3-1-1サンシャイン60ビル）               |
| 1211 | 大塚・栄クリニック    | 170-0005 | 東京都豊島区南大塚3-45-5 サンユースビル1F   | 03-3987-8110 | <a href="http://www.otsukaeiichiclinic.jp">http://www.otsukaeiichiclinic.jp</a>                                     | ○                  | ○                  | 心療内科、内科、歯科       | 内田 栄一         | 東京都立大塚病院（東京都豊島区南大塚2-8-1）                     |
| 1212 | 大塚北口眼科       | 170-0004 | 東京都豊島区北大塚2-6-12 KSK大塚医療ビル4F | 03-3949-1195 | <a href="https://www.keiseikai-group.com/ootsuka_eyeclinic/">https://www.keiseikai-group.com/ootsuka_eyeclinic/</a> | ○                  | ○                  | 眼科               | 杉本 聡子         |                                              |
| 1213 | 大塚北口診療所      | 170-0004 | 東京都豊島区北大塚2-6-12 KSK大塚医療ビル1F | 03-3949-1141 | <a href="https://www.keiseikai-group.com/ootsuka_kitaguchi/">https://www.keiseikai-group.com/ootsuka_kitaguchi/</a> | ○                  | ○                  | 消化器科<br>内科       | 河 一京<br>小島 陽子 |                                              |
| 1214 | 岡崎耳鼻咽喉科医院    | 171-0033 | 東京都豊島区高田1-40-12岡崎ビル2F       | 03-3981-0763 |                                                                                                                     | ○                  | ○                  | 耳鼻咽喉科<br>アレルギー科  | 岡崎健二          |                                              |
| 1215 | 北池袋こころのクリニック | 170-0011 | 東京都豊島区池袋本町1-38-14ナゴヤビル1階    | 03-5924-6851 | <a href="http://kitaike-cocoro.com/">http://kitaike-cocoro.com/</a>                                                 |                    | ○                  | 心療内科・精神科         | 春日 悠貴         |                                              |

電話や情報通信機器を用いて診療を実施する医療機関の一覧（東京都）

|      | 基本情報            |          |                            |              |                                                                                                           | 事務連絡に基づく対応について     |                    |                            |         |                                              |
|------|-----------------|----------|----------------------------|--------------|-----------------------------------------------------------------------------------------------------------|--------------------|--------------------|----------------------------|---------|----------------------------------------------|
|      | 施設名             | 郵便番号     | 住所（都道府県から記載）               | 電話番号         | ウェブサイトURL                                                                                                 | 初診の電話等を用いた診療の実施の有無 | 再診の電話等を用いた診療の実施の有無 | 対応診療科                      | 担当医師名   | 対面診療が必要と判断した場合に連携する医療機関名（複数ある場合は複数、住所も併せて記載） |
| 1216 | 木村整形外科          | 1710022  | 東京都豊島区南池袋2-29-4            | 03-3984-3306 | <a href="http://www.kimura-seikei.com">http://www.kimura-seikei.com</a>                                   |                    | ○                  | 整形外科                       | 木村 元    |                                              |
| 1217 | こがクリニック         | 170-0004 | 東京都豊島区北大塚1-20-90SKビル401    | 03-5972-1465 |                                                                                                           |                    | ○                  | 内科<br>循環器内科                | 古賀 規貴   |                                              |
| 1218 | 新大塚こどもクリニック     | 170-0005 | 東京都豊島区南大塚2-15-7            | 03-3944-0808 | <a href="http://eri-kids.com/">http://eri-kids.com/</a>                                                   | ○                  | ○                  | 小児科                        | 杉田 依里   | 東京都立大塚病院（東京都豊島区南大塚二丁目8番1号）                   |
| 1219 | すがも駅前耳鼻咽喉科クリニック | 170-0002 | 東京都豊島区巣鴨1-14-5 第一松岡ビル4階    | 03-3947-1050 | <a href="http://sugamo.sho-jin.com/">http://sugamo.sho-jin.com/</a>                                       | ○                  | ○                  | 耳鼻科                        | 高野澤 美奈子 |                                              |
| 1220 | すがも北口内科クリニック    | 170-0002 | 東京都豊島区巣鴨2-3-10<br>森川第1ビル5階 | 03-5980-9225 | <a href="http://kaiseikai-net.or.jp/group/sugamo-naika">http://kaiseikai-net.or.jp/group/sugamo-naika</a> |                    | ○                  | 内科<br>呼吸器内科                | 山本 義孝   |                                              |
| 1221 | 巣鴨こし石クリニック      | 170-0002 | 東京都豊島区巣鴨3-30-3             | 03-3918-6566 | <a href="https://www.ogata-iin.com/">https://www.ogata-iin.com/</a>                                       |                    | ○                  | 内科 小児科<br>呼吸器内科 ア<br>レルギー科 | 輿石 義彦   |                                              |
| 1222 | すがも小林皮フ科        | 170-0002 | 東京都豊島区巣鴨2-1-2 ブラウンタワー3階    | 03-5972-1825 | <a href="http://www.s-Kobayashi-derma.com">http://www.s-Kobayashi-derma.com</a>                           | ○                  | ○                  | 皮膚科<br>美容皮膚科               | 小林道子    |                                              |
| 1223 | 巣鴨千石皮ふ科         | 170-0002 | 東京都豊島区巣鴨1-20-10宝生第1ビル5F    | 03-3941-1241 | <a href="https://sugamo-sengoku-hifu.jp/">https://sugamo-sengoku-hifu.jp/</a>                             | ○                  | ○                  | 皮膚科<br>アレルギー科              | 小西 真絢   |                                              |
| 1224 | 巣鴨泌尿器科内科クリニック   | 170-0002 | 東京都豊島区巣鴨1-30-2ハイツサンアベニュー2F | 03-6912-0767 | <a href="http://sugamo-urology.com/">http://sugamo-urology.com/</a>                                       | ○                  | ○                  | 泌尿器科等                      | 篠原充     |                                              |



電話や情報通信機器を用いて診療を実施する医療機関の一覧（東京都）

|      | 基本情報              |          |                              |              |                                  | 事務連絡に基づく対応について     |                    |               |                        |                                              |
|------|-------------------|----------|------------------------------|--------------|----------------------------------|--------------------|--------------------|---------------|------------------------|----------------------------------------------|
|      | 施設名               | 郵便番号     | 住所（都道府県から記載）                 | 電話番号         | ウェブサイトURL                        | 初診の電話等を用いた診療の実施の有無 | 再診の電話等を用いた診療の実施の有無 | 対応診療科         | 担当医師名                  | 対面診療が必要と判断した場合に連携する医療機関名（複数ある場合は複数、住所も併せて記載） |
| 1225 | 巣鴨山口内科・糖尿病内科クリニック | 170-0002 | 東京都豊島区巣鴨1-20-10 宝生第一ビル3階A    | 03-5395-5700 | https://yamaguchi-dm.com/        | ○                  | ○                  | 内科<br>糖尿病内科   | 山口賢                    |                                              |
| 1226 | セントクリニック池袋駅前      | 171-0021 | 東京都豊島区西池袋1-16-10第2三笠ビル3階     | 03-6812-1902 | http://www.syntcl.com/           | ○                  | ○                  | 内科<br>耳鼻咽喉科   | 深井 有美<br>盛田 恵          |                                              |
| 1227 | せんかわ耳鼻咽喉科         | 171-0043 | 東京都豊島区要町3-39-5               | 03-5926-8077 | http://kjibi.net/sjibi/          |                    | ○                  | 耳鼻咽喉科         | 野本 剛輝                  |                                              |
| 1228 | 雑司が谷赤ちゃん・こどもクリニック | 171-0032 | 東京都豊島区雑司が谷3-1-20 S.Zビル201    | 03-6907-0037 | http://www.baby-kids-clinic.com/ | ○                  | ○                  | 小児科 内科        | 青柳裕之 中務秀嗣<br>波多野恵      | 都立大塚病院 東京女子医大病院 日本大学医学部付属病院 速やかに対面診療も可能です    |
| 1229 | たいようクリニック池袋院      | 171-0014 | 東京都豊島区池袋2-41-2 葉山ビル5階        | 03-5985-4721 | https://home.sun-cl.jp/          | ○                  | ○                  | 泌尿器科          | 赤桐 一弘                  |                                              |
| 1230 | 高橋クリニック           | 170-0003 | 東京都豊島区駒込2-12-11              | 03-5907-7311 |                                  |                    | ○                  | 内科<br>外科      | 高橋 望                   | 花と森の東京病院                                     |
| 1231 | 田村医院              | 170-0011 | 東京都豊島区池袋本町1-45-16            | 03-3971-4922 | http://www.tamura-cl.jp/         |                    | ○                  | 内科<br>小児科     | 田村 仁<br>田村 奈渚<br>田中 朝志 |                                              |
| 1232 | TOMクリニック池袋院       | 170-0013 | 東京都豊島区東池袋1-15-3 近代ビルNo.12 7F | 03-5927-7531 | https://www.tom-clinic.com/      |                    | ○                  | 自由診療<br>(AGA) | 大屋久晴                   |                                              |
| 1233 | 東京美容医療クリニック       | 171-0022 | 東京都豊島区南池袋1-23-11 池袋ブロンズビル10階 | 03-6709-2656 | http://tokyo-biyo.com/           | ○                  | ○                  | 美容皮膚科・皮膚科     | 高 尚威                   | Wi clinic銀座院（東京都中央区銀座8-9-16長崎センタービル9階）       |

電話や情報通信機器を用いて診療を実施する医療機関の一覧（東京都）

|      | 基本情報            |          |                               |              |                                                                                                       | 事務連絡に基づく対応について     |                    |                          |                       |                                                   |
|------|-----------------|----------|-------------------------------|--------------|-------------------------------------------------------------------------------------------------------|--------------------|--------------------|--------------------------|-----------------------|---------------------------------------------------|
|      | 施設名             | 郵便番号     | 住所（都道府県から記載）                  | 電話番号         | ウェブサイトURL                                                                                             | 初診の電話等を用いた診療の実施の有無 | 再診の電話等を用いた診療の実施の有無 | 対応診療科                    | 担当医師名                 | 対面診療が必要と判断した場合に連携する医療機関名（複数ある場合は複数、住所も併せて記載）      |
| 1234 | 豊島中央病院          | 170-0012 | 東京都豊島区上池袋2-42-21              | 03-3916-7211 | <a href="https://www.toshima-chuo-hospital.jp/">https://www.toshima-chuo-hospital.jp/</a>             |                    | ○                  | 内科                       | 澤田 登起彦                | 豊島中央病院（東京都豊島区上池袋2-42-21）                          |
| 1235 | ノガキクリニック        | 171-0021 | 東京都豊島区西池袋3-22-13 丸栄ビル2F       | 03-3980-6150 | <a href="http://www.nogaki-cl.com">http://www.nogaki-cl.com</a>                                       |                    | ○                  | 泌尿器科<br>内科、外科            | 野垣 譲二                 | 東京都保健医療公社豊島病院（東京都板橋区栄町）<br>日本大学医学部板橋病院（東京都板橋区大谷口） |
| 1236 | 野田さくらハートクリニック   | 170-0003 | 東京都豊島区駒込4-15-19               | 03-3915-5500 | <a href="http://noda-sakuraheart-clinic.com">http://noda-sakuraheart-clinic.com</a>                   | ○                  | ○                  | 内科                       | 野田 誠                  |                                                   |
| 1237 | 林胃腸科外科クリニック     | 170-6007 | 東京都豊島区東池袋3-1-1サンシャイン60ビル7階    | 03-3988-5700 | <a href="https://www.hayashi-clinic.org/">https://www.hayashi-clinic.org/</a>                         | ○                  | ○                  | 内科                       | 林 竜平                  | 都立大塚病院（豊島区南大塚2-8-1）                               |
| 1238 | 東長崎駅前内科クリニック    | 171-0051 | 東京都豊島区长崎4-7-11 マスターズ東長崎1階     | 03-5926-9664 | <a href="https://umeoka-cl.com/higashinagasaki/">https://umeoka-cl.com/higashinagasaki/</a>           | ○                  | ○                  | 内科消化器科                   | 吉良文孝                  |                                                   |
| 1239 | ファミリークリニックしいなまち | 171-0052 | 東京都豊島区南長崎1-25-26ファーマシティ II 2A | 03-6908-2234 | <a href="http://fcls.jp/">http://fcls.jp/</a>                                                         |                    | ○                  | 内科 小児科                   | 保坂辰樹                  |                                                   |
| 1240 | 町のクリニック目白       | 171-0033 | 東京都豊島区高田1-19-21 1階            | 03-3971-5500 | <a href="https://lifeworkbalance.jp/family-medicine/">https://lifeworkbalance.jp/family-medicine/</a> | ○                  | ○                  | 内科<br>小児科<br>外科          | 重島祐介                  |                                                   |
| 1241 | 南池袋パークサイドクリニック  | 171-0022 | 東京都豊島区南池袋2-27-17 いちご南池袋ビル3階   | 03-5957-3443 | <a href="http://www.mipc.jp">http://www.mipc.jp</a>                                                   |                    | ○                  | 内分泌外科<br>内分泌内科           | 飯原雅季<br>川真田明子<br>鈴木留美 |                                                   |
| 1242 | 南大塚クリニック        | 170-0005 | 東京都豊島区南大塚2-41-9 坂本ビル1階        | 03-3943-7277 | <a href="https://www.m-otsuka-clinic.com/">https://www.m-otsuka-clinic.com/</a>                       |                    | ○                  | 内科、リウマチ科、アレルギー科、泌尿器科、皮膚科 | 岡本 完                  |                                                   |

電話や情報通信機器を用いて診療を実施する医療機関の一覧（東京都）

|      | 基本情報              |          |                              |               |                                | 事務連絡に基づく対応について     |                    |                                               |                                                                                    |                                                                                                                                                                                               |
|------|-------------------|----------|------------------------------|---------------|--------------------------------|--------------------|--------------------|-----------------------------------------------|------------------------------------------------------------------------------------|-----------------------------------------------------------------------------------------------------------------------------------------------------------------------------------------------|
|      | 施設名               | 郵便番号     | 住所（都道府県から記載）                 | 電話番号          | ウェブサイトURL                      | 初診の電話等を用いた診療の実施の有無 | 再診の電話等を用いた診療の実施の有無 | 対応診療科                                         | 担当医師名                                                                              | 対面診療が必要と判断した場合に連携する医療機関名（複数ある場合は複数、住所も併せて記載）                                                                                                                                                  |
| 1243 | 目白駅前クリニック         | 171-0031 | 東京都豊島区目白三丁目4番11号ヒューリック目白ビル3階 | 03-5906-5806  | https://mejiroekimae.com/      | ○                  | ○                  | 内科<br>循環器内科                                   | 明石英之<br>岸川正大<br>青山麻織<br>渡部創<br>岡部崇志                                                |                                                                                                                                                                                               |
| 1244 | 目白すずきクリニック        | 171-0031 | 東京都豊島区目白3丁目12-11             | 050-3187-6569 | http://mejiro3.jp/             | ○                  | ○                  | 内科                                            | 鈴木市三                                                                               | 豊島病院（東京都江東区電戸8丁目8-8）<br>日本大学医学部附属板橋病院（東京都板橋区大谷口上町30-1）<br>東京警察病院（東京都中野区中野4丁目22-1）<br>練馬総合病院（東京都練馬区旭丘1丁目24-1）<br>大久保病院（東京都新宿区歌舞伎町2丁目44-1）<br>聖母病院（東京都新宿区中落合2丁目5-1）<br>総合東京病院（東京都中野区江古田3丁目15-2） |
| 1245 | 目白整形外科内科          | 171-0031 | 東京都豊島区目白2-38-2               | 03-5960-7800  | https://www.mejiro-seikei.com/ | ○                  | ○                  | 整形外科 内科                                       | 東京都新宿区                                                                             | 目白病院（東京都新宿区下落合3-22-23） 聖母病院（東京都新宿区中落合2-5-1）                                                                                                                                                   |
| 1246 | 目白乳腺クリニック         | 171-0031 | 東京都豊島区目白3-4-11 ヒューリック目白3階    | 03-6908-1026  | https://www.mejiro-breast.jp   |                    | ○                  | 乳腺外科                                          | 緒方晴樹                                                                               | 東京通信病院（千代田区富士見2-4-17）                                                                                                                                                                         |
| 1247 | 目白メンタルクリニック       | 171-0031 | 東京都豊島区目白3-4-11-3階            | 03-5906-5863  | http://www.mejiro-mental.com   |                    | ○                  | 精神科<br>心療内科                                   | 須田 賢太                                                                              |                                                                                                                                                                                               |
| 1248 | めじろ安田眼科           | 171-0031 | 東京都豊島区目白3-4-11ヒューリック目白2階     | 03-3565-6536  | https://yasuda-eye.com/        |                    | ○                  | 眼科                                            | 安田 明弘                                                                              |                                                                                                                                                                                               |
| 1249 | モモ・メディカルクリニック     | 170-0005 | 東京都豊島区南大塚1-51-1              | 03-3945-3344  | https://www.momo-mc.com/       |                    | ○                  | 内科                                            | 百瀬隆二                                                                               |                                                                                                                                                                                               |
| 1250 | 医療法人社団法山会 山下診療所大塚 | 170-0004 | 東京都豊島区北大塚2-13-1 ba07 5F      | 03-3910-6711  | http://hozankai.com/           | ○                  | ○                  | 内科、小児科、<br>耳鼻科、循環器<br>内科、呼吸器内<br>科、アレルギー<br>科 | 山下 巖、成本<br>治、稲葉 敦、<br>竹下 久美子、<br>野村 由香、大<br>島 華倫、谷田<br>けい、宮本 智<br>史、石井 裕<br>子、軽部 暁 |                                                                                                                                                                                               |
| 1251 | ゆみのハートクリニック       | 171-0033 | 東京都豊島区高田3-14-29KDX高田馬場ビル1F   | 03-5956-8010  | https://www.yumino-clinic.com/ |                    | ○                  | 内科<br>循環器内科<br>呼吸器内科                          | 弓野 大<br>臼井 靖博                                                                      | 国立国際医療研究センター病院（東京都新宿区戸山1-21-1）                                                                                                                                                                |

電話や情報通信機器を用いて診療を実施する医療機関の一覧（東京都）

|      | 基本情報                    |          |                            |              |                                        | 事務連絡に基づく対応について     |                    |                                |                         |                                              |
|------|-------------------------|----------|----------------------------|--------------|----------------------------------------|--------------------|--------------------|--------------------------------|-------------------------|----------------------------------------------|
|      | 施設名                     | 郵便番号     | 住所（都道府県から記載）               | 電話番号         | ウェブサイトURL                              | 初診の電話等を用いた診療の実施の有無 | 再診の電話等を用いた診療の実施の有無 | 対応診療科                          | 担当医師名                   | 対面診療が必要と判断した場合に連携する医療機関名（複数ある場合は複数、住所も併せて記載） |
| 1252 | 吉田クリニック                 | 170-0002 | 東京都豊島区巢鴨4-30-12            | 03-5907-3553 | http://www.y-clinic2007.com            | ○                  | ○                  | 内科<br>消化器科<br>外科<br>肛門科<br>リハ科 | 吉田竜介                    | * 当院に来院するか、不可能であれば、一心病院（豊島区北大塚1-18-7）        |
| 1253 | 立教通り皮フ科形成外科             | 171-0021 | 東京都豊島区西池袋3-29-9            | 03-5954-3051 | https://rikkyo-dps.com                 | ○                  | ○                  | 皮膚科、アレルギー科                     | 須澤 由希子                  |                                              |
| 1254 | 和こころクリニック               | 171-0014 | 東京都豊島区池袋2-48-9 恩京7ムビル2階    | 03-6907-2520 | https://wacocoro-clinic.jp             |                    | ○                  | 精神科<br>心療内科                    | 中山 寿一                   |                                              |
| 1255 | 池袋心療内科メディカル<br>オーククリニック | 171-0021 | 東京都豊島区西池袋1-39-4第一大谷ビル5階    | 03-5391-9602 | http://medical-oak.com                 |                    | ○                  | 心療内科<br>精神科                    | 小川原 純子<br>山岡 昌之         | 成増厚生病院（東京都板橋区三園）                             |
| 1256 | 北池袋よしだ内科クリ<br>ニック       | 170-0012 | 東京都豊島区上池袋4-29-9北池テラス4階     | 03-3916-8010 | https://kitaike-clinic.com             |                    | ○                  | 内科<br>循環器内科<br>消化器内科           | 吉田 裕志<br>吉田 裕志<br>吉田 見紀 |                                              |
| 1257 | 青木内科クリニック               | 114-0024 | 東京都北区西ヶ原1-46-17            | 03-5961-1855 | http://www.aoki-naika-clinic.com/      | ○                  | ○                  | 内科<br>小児科                      | 青木 薫                    | 都立大塚病院（東京都豊島区南大塚2-8-1）                       |
| 1258 | 赤羽胃腸肛門クリニック             | 115-0055 | 東京都北区赤羽西1-40-5 3F          | 03-5924-1500 | https://akabaneichoukoumon.com/<br>/   |                    | ○                  | 大腸・肛門外<br>科、胃腸内科、<br>内科        | 山村芳弘、葛岡<br>健太郎 他        |                                              |
| 1259 | 赤羽駅前女性クリニック             | 115-0045 | 東京都北区赤羽1-13-1ミドリヤビル4階      | 03-6903-9090 | https://akabane-ekimaec1.com           | ○                  | ○                  | 産婦人科                           | 深沢 瞳子                   |                                              |
| 1260 | 赤羽すずらん眼科                | 115-0045 | 東京都北区赤羽2-9-10 グリーンハイム赤羽101 | 03-3903-6336 | http://suzuraneye.byoinnavi.jp<br>/pc/ |                    | ○                  | 眼科                             | 大須賀方子                   |                                              |

電話や情報通信機器を用いて診療を実施する医療機関の一覧（東京都）

|      | 基本情報                |          |                            |              |                                | 事務連絡に基づく対応について     |                    |                                                           |                |                                                                      |
|------|---------------------|----------|----------------------------|--------------|--------------------------------|--------------------|--------------------|-----------------------------------------------------------|----------------|----------------------------------------------------------------------|
|      | 施設名                 | 郵便番号     | 住所（都道府県から記載）               | 電話番号         | ウェブサイトURL                      | 初診の電話等を用いた診療の実施の有無 | 再診の電話等を用いた診療の実施の有無 | 対応診療科                                                     | 担当医師名          | 対面診療が必要と判断した場合に連携する医療機関名（複数ある場合は複数、住所も併せて記載）                         |
| 1261 | 赤羽中央総合病院            | 115-0044 | 東京都北区赤羽南2-5-12             | 03-3902-0348 | http://www.hakueikai.or.jp     |                    | ○                  | 内科                                                        | 外来担当医          |                                                                      |
| 1262 | 赤羽病院                | 115-0045 | 東京都北区赤羽2-2-1               | 03-3902-3261 | https://www.akabane-hp.com     |                    | ○                  | 内科<br>整形外科<br>外科                                          | 古川 清憲他         |                                                                      |
| 1263 | いさ内科クリニック           | 114-0002 | 東京都北区王子1-25-10アルカディア津多屋 1F | 03-3927-1105 |                                | ○                  | ○                  | 内科<br>小児科<br>神経内科                                         | 伊佐 文子          |                                                                      |
| 1264 | 板橋眼科山田医院            | 114-0023 | 東京都北区滝野川7-11-10            | 03-3916-5885 |                                |                    | ○                  | 眼科                                                        | 山田 真           |                                                                      |
| 1265 | いずみ整形外科クリニック        | 115-0055 | 東京都北区赤羽西1-4-15 グランデール赤羽    | 03-5948-2911 | https://www.izumi-seikei.com/  |                    | ○                  | 整形外科                                                      | 泉 正隆           |                                                                      |
| 1266 | いとう王子神谷内科外科クリニック    | 114-0002 | 東京都北区王子5-5-3 シーマン王子神谷3階    | 03-5959-7705 | https://itokc.jp/              | ○                  | ○                  | 内科<br>小児科<br>外科<br>乳腺外科<br>呼吸器内科<br>消化器内科<br>内視鏡内科<br>皮膚科 | 伊藤 博道<br>伊藤 美帆 | 基本的に当院で対応する。重症例・治療抵抗例・数的に困難な場合は、東京北医療センター・明理会中央総合病院・帝京大学病院へ紹介しております。 |
| 1267 | 医療法人社団 五十嵐医院        | 115-0045 | 東京都北区赤羽1-49-9              | 03-3901-3131 | http://www.igarashi-iin.com    | ○                  | ○                  | 皮膚科                                                       | 五十嵐 勝          |                                                                      |
| 1268 | 医療法人社団AT たむら内科クリニック | 115-0043 | 東京都北区神谷2-25-4              | 03-3598-0888 | https://tamura-naikaclinic.com |                    | ○                  | 内科                                                        | 田村 彰教          |                                                                      |
| 1269 | 医療法人社団 おかだ皮膚科クリニック  | 115-0045 | 東京都北区赤羽1-2-2モン・マレー202      | 03-3595-1165 | http://www.okada-hifuka.com    |                    | ○                  | 皮膚科 アレルギ科                                                 | 岡田裕之           |                                                                      |

電話や情報通信機器を用いて診療を実施する医療機関の一覧（東京都）

|      | 基本情報                    |          |                                |              |                                 | 事務連絡に基づく対応について     |                    |                           |                         |                                              |
|------|-------------------------|----------|--------------------------------|--------------|---------------------------------|--------------------|--------------------|---------------------------|-------------------------|----------------------------------------------|
|      | 施設名                     | 郵便番号     | 住所（都道府県から記載）                   | 電話番号         | ウェブサイトURL                       | 初診の電話等を用いた診療の実施の有無 | 再診の電話等を用いた診療の実施の有無 | 対応診療科                     | 担当医師名                   | 対面診療が必要と判断した場合に連携する医療機関名（複数ある場合は複数、住所も併せて記載） |
| 1270 | 医療法人社団啓仁会 平川胃腸クリニック     | 115-0055 | 東京都北区赤羽西1丁目6-1 ビビオ3F           | 03-3900-2232 | http://hirakawa-icho.med.gr.jp/ | ○                  | ○                  | 内科<br>消化器内科<br>放射線科       | 平川 賢                    | 東京北医療センター（東京都北区赤羽台4-17-56）                   |
| 1271 | 医療法人社団康優会染谷メンタルクリニック    | 114-0002 | 東京都北区王子2-12-12 松尾ビル1F          | 03-5959-8511 | http://www.someyamental.com/    | ○                  | ○                  | 精神科<br>心療内科               | 染谷康宏<br>松野泰彦<br>竹内崇     | 東京医科歯科大学医学部附属病院（東京都文京区湯島1-5-45）              |
| 1272 | 医療法人社団 彩祥会 中島皮フ科        | 115-0045 | 東京都北区赤羽2-23-2 1.2階             | 03-3598-2823 | https://nakashima-hifuka.com/   | ○                  | ○                  | 皮膚科/美容皮膚科/形成外科/<br>アレルギー科 | 中島 知賀子                  |                                              |
| 1273 | 医療法人社団 爽健会 中田医院         | 114-0015 | 東京都北区中里2-20-15-202             | 03-3940-0504 |                                 |                    | ○                  | 内科                        | 中田 一也                   | 都立駒込病院 日本医科大学付属病院 花と森の東京病院                   |
| 1274 | 医療法人社団慈広会 王子神谷齋藤クリニック   | 114-0003 | 東京都北区豊島8-24-4                  | 03-3911-5433 | http://www.saito-clinic.or.jp   | ○                  | ○                  | 内科 循環器科<br>消化器科 小児科       | 齋藤広重 齋藤奈々子              |                                              |
| 1275 | 医療法人社団寿廣記念会 岸メディカルクリニック | 114-0034 | 東京都北区上十条2-21-1                 | 03-3908-2103 | http://www.kishi-hospital.or.jp | ○                  | ○                  | 内科<br>整形外科                | 岸ひさ子・鈴木伸明・中島利菜・鈴木崇史・芳野晃 |                                              |
| 1276 | 医療法人財団 富士病院             | 114-0024 | 東京都北区西ヶ原3-33-11                | 03-3910-6661 | http://www.fujihospital.com     |                    | ○                  | 精神科                       | 安部 千晶                   |                                              |
| 1277 | うえやま眼科                  | 114-0002 | 東京都北区王子5-1-40 サミットストア王子桜田通り店2階 | 03-3914-3300 | https://ueyama-ganka.com/       |                    | ○                  | 眼科                        | 上山 数弘<br>上山 さやか         |                                              |
| 1278 | 浮間小児科クリニック              | 115-0051 | 東京都北区浮間4-1-12                  | 03-3558-8777 | https://www.ukima-cl.com/       | ○                  | ○                  | 小児科                       | 有坂玲子                    |                                              |

電話や情報通信機器を用いて診療を実施する医療機関の一覧（東京都）

|      | 基本情報             |          |                              |              |                                                                       | 事務連絡に基づく対応について     |                    |                           |                 |                                                            |
|------|------------------|----------|------------------------------|--------------|-----------------------------------------------------------------------|--------------------|--------------------|---------------------------|-----------------|------------------------------------------------------------|
|      | 施設名              | 郵便番号     | 住所（都道府県から記載）                 | 電話番号         | ウェブサイトURL                                                             | 初診の電話等を用いた診療の実施の有無 | 再診の電話等を用いた診療の実施の有無 | 対応診療科                     | 担当医師名           | 対面診療が必要と判断した場合に連携する医療機関名（複数ある場合は複数、住所も併せて記載）               |
| 1279 | おうじキッズクリニック      | 112-0002 | 東京都北区王子5-1-40サットスト7王子桜田通り店2階 | 03-3914-1511 | <a href="http://oji-kids.com/">http://oji-kids.com/</a>               |                    | ○                  | 小児科                       | 若林太一<br>米沢文恵    | 東京北医療センター（東京都北区赤羽台4-17-56）<br>帝京大学医学部付属病院（東京都板橋区加賀 2-11-1） |
| 1280 | 王子生協病院           | 114-0003 | 東京都北区豊島3-4-15                | 03-3912-2201 | <a href="http://oujiseikyo-hp.jp/">http://oujiseikyo-hp.jp/</a>       |                    | ○                  | 内科<br>整形<br>泌尿器           | 各医師             |                                                            |
| 1281 | おおたけ整形外科・内科      | 114-0002 | 東京都北区王子1-8-1 王子パークビル6F       | 03-3914-1177 | <a href="https://ojiotake-clinic.com">https://ojiotake-clinic.com</a> | ○                  | ○                  | 整形外科<br>内科                | 大武 修一郎<br>大武 幸子 | 東京北医療センター（東京都北区赤羽台3-17-56）<br>東京女子医科大学病院（東京都新宿区河田町8-1）     |
| 1282 | 大西医院             | 114-0002 | 東京都北区王子4-17-2                | 03-3911-3387 |                                                                       | ○                  | ○                  | 耳鼻咽喉科                     | 長井 由紀           |                                                            |
| 1283 | 大橋病院             | 115-0054 | 東京都北区桐ヶ丘1-22-1               | 03-3907-1222 | <a href="https://www.o-hp.or.jp">https://www.o-hp.or.jp</a>           |                    | ○                  | 内科・神経内科<br>整形外科・外科<br>婦人科 | 外来担当医           |                                                            |
| 1284 | おひさまクリニック        | 114-0034 | 東京都北区上十条1-19-8               | 03-6454-3511 | <a href="https://ohisamakodomo.com/">https://ohisamakodomo.com/</a>   | ○                  | ○                  | 小児科<br>耳鼻咽喉科<br>アレルギー科    | 金高太一<br>金高清佳    | 東京北医療センター（東京都北区）<br>帝京大学医学部付属病院（東京都板橋区）など                  |
| 1285 | おりはた乳腺胃腸パラスクリニック | 115-0045 | 東京都北区赤羽2-13-3サトウビル2F         | 03-3092-3123 | <a href="https://paras.jp/">https://paras.jp/</a>                     | ○                  | ○                  | 乳腺外科 内科<br>消化器内科          | 織畑剛太郎           |                                                            |
| 1286 | 加治クリニック          | 114-0023 | 東京都北区滝野川7-2-7藤和板橋コープ         | 03-5394-1925 |                                                                       | ○                  | ○                  | 内科<br>小児科                 | 加治 正弘           |                                                            |
| 1287 | 上中里醫院            | 114-0016 | 東京都北区上中里2-32-12              | 03-3911-3740 | <a href="http://kaminakazato-cl.com/">http://kaminakazato-cl.com/</a> |                    | ○                  | 内科                        | 青木久幸            |                                                            |

電話や情報通信機器を用いて診療を実施する医療機関の一覧（東京都）

|      | 基本情報                  |          |                               |              |                                                                       | 事務連絡に基づく対応について     |                    |             |                                                                    |                                              |
|------|-----------------------|----------|-------------------------------|--------------|-----------------------------------------------------------------------|--------------------|--------------------|-------------|--------------------------------------------------------------------|----------------------------------------------|
|      | 施設名                   | 郵便番号     | 住所（都道府県から記載）                  | 電話番号         | ウェブサイトURL                                                             | 初診の電話等を用いた診療の実施の有無 | 再診の電話等を用いた診療の実施の有無 | 対応診療科       | 担当医師名                                                              | 対面診療が必要と判断した場合に連携する医療機関名（複数ある場合は複数、住所も併せて記載） |
| 1288 | 河村内科                  | 115-0053 | 東京都北区赤羽台3丁目25番19号             | 03-5993-8333 |                                                                       | ○                  | ○                  | 内科・小児科      | 河村 雅明                                                              |                                              |
| 1289 | 北赤羽さきやま皮膚科            | 115-0052 | 東京都北区赤羽北2-24-24バンイードビル101     | 03-3905-4112 | <a href="https://kitaaka-hifuka.com/">https://kitaaka-hifuka.com/</a> |                    | ○                  | 皮膚科         | 崎山真幸<br>崎山とも                                                       |                                              |
| 1290 | 桐ヶ丘団地診療所              | 115-0053 | 東京都北区赤羽台3丁目17番地               | 03-3907-2029 | <a href="http://www.kenbun.or.jp">http://www.kenbun.or.jp</a>         |                    | ○                  | 内科          | 高野 勝匡<br>小田 実<br>川杉 和夫<br>岩野 知世<br>岩間 昌大<br>石川 徹<br>松崎 寛崇<br>鹿戸 福子 |                                              |
| 1291 | 桑畑医院                  | 114-0003 | 東京都北区豊島2-6-1                  | 03-3919-0700 |                                                                       |                    | ○                  | 小児科         | 桑畑圭子                                                               |                                              |
| 1292 | 小出医院                  | 114-0014 | 東京都北区田端3-4-7                  | 03-3821-1668 |                                                                       | ○                  | ○                  | 内科<br>小児科   | 小出研爾                                                               | 都立駒込病院<br>都立大塚病院<br>日本医大                     |
| 1293 | 公益社団法人発達協会王子クリニック     | 115-0044 | 東京都北区赤羽南2-10-20               | 03-3903-3311 | <a href="http://ojiclinic.jp">ojiclinic.jp</a>                        |                    | ○                  | 精神科         | 石崎朝世<br>洲鎌倫子<br>竹内紀子<br>大谷良子<br>伊東ゆたか                              |                                              |
| 1294 | 河野診療所                 | 115-0055 | 東京都北区赤羽西1-1-4                 | 03-3900-4385 |                                                                       | ○                  | ○                  | 内科          | 安田寛治郎                                                              |                                              |
| 1295 | ごとう内科                 | 114-0002 | 東京都北区王子5-1-40サミットストア王子桜田通り店2階 | 03-3914-2510 | <a href="http://gotonaika.jp/">http://gotonaika.jp/</a>               |                    | ○                  | 内科<br>消化器内科 | 後藤 英晃                                                              |                                              |
| 1296 | こまごめ内科・循環器内科<br>クリニック | 114-0014 | 東京都北区田端4-3-2 山積ビル1F           | 03-5832-9600 | <a href="https://komagome-naika.com/">https://komagome-naika.com/</a> | ○                  | ○                  | 内科<br>循環器内科 | 西城 由之                                                              |                                              |



電話や情報通信機器を用いて診療を実施する医療機関の一覧（東京都）

|      | 基本情報               |          |                         |              |                                        | 事務連絡に基づく対応について     |                    |                  |                                |                                                          |
|------|--------------------|----------|-------------------------|--------------|----------------------------------------|--------------------|--------------------|------------------|--------------------------------|----------------------------------------------------------|
|      | 施設名                | 郵便番号     | 住所（都道府県から記載）            | 電話番号         | ウェブサイトURL                              | 初診の電話等を用いた診療の実施の有無 | 再診の電話等を用いた診療の実施の有無 | 対応診療科            | 担当医師名                          | 対面診療が必要と判断した場合に連携する医療機関名（複数ある場合は複数、住所も併せて記載）             |
| 1297 | こやの整形外科内科          | 114-0002 | 東京都北区王子4-22-1-101       | 03-5959-5831 | http://www.koyano.or.jp/               |                    | ○                  | 整形外科<br>内科       | 小谷野誠司                          |                                                          |
| 1298 | さくらクリニック           | 114-0021 | 東京都北区岸町1-3-1 伯清王子ビル3F   | 03-3908-0001 | https://sakura.clinic                  |                    | ○                  | 泌尿器科、内科          | 砂倉瑞明                           |                                                          |
| 1299 | 十条霞医院              | 114-0034 | 東京都北区上十条4-6-13          | 03-5948-8536 | http://jujokasumi.in.jp                | ○                  | ○                  | 婦人科<br>内科        | 史 周霞                           |                                                          |
| 1300 | 城北診療所              | 115-0052 | 東京都北区赤羽北二丁目19番地1号       | 03-3907-1523 |                                        |                    | ○                  | 内科<br>小児科<br>精神科 | 汐月 信仁<br>汐月 治実                 | 板橋中央総合病院(東京都板橋区小豆沢2-12-7)<br>帝京大学医学部附属病院(東京都板橋区加賀2-11-1) |
| 1301 | 須賀田医院              | 114-0024 | 東京都北区西ヶ原1-53-1エリーワールド1F | 03-3918-2816 |                                        |                    | ○                  | 内科               | 須賀田 元彦                         |                                                          |
| 1302 | すこやかこどもクリニック<br>浮間 | 115-0053 | 東京都北区浮間3-1-40           | 03-5918-9421 | https://ukima.sukoyaka-kodomo.clinic   | ○                  | ○                  | 小児科              | 金井 慎一                          |                                                          |
| 1303 | すずきクリニック           | 115-0045 | 東京都北区赤羽2-69-4-1F        | 03-3598-3310 | http://www.akabane-suzukiclinic.jp/    | ○                  | ○                  | 内科<br>脳神経内科      | 鈴木 敏文<br>鈴木 健太郎                |                                                          |
| 1304 | 生協浮間診療所            | 115-0051 | 東京都北区浮間3-22-1           | 03-3558-8361 | http://www.t-hokuto.coop/clinic/ukima/ |                    | ○                  | 内科               | 藤沼 康樹                          |                                                          |
| 1305 | 生協診療所              | 114-0001 | 東京都北区東十条2-8-5           | 03-3913-5271 | http://hokuto-kita-clinic.jp/          |                    | ○                  | 内科<br>整形外科       | 大場 俊英<br>餌取 博<br>秋山 潤<br>渡会 公治 |                                                          |

電話や情報通信機器を用いて診療を実施する医療機関の一覧（東京都）

|      | 基本情報                 |          |                            |              |                                                                                         | 事務連絡に基づく対応について     |                    |                                                         |                                             |                                                                                                                                                                                                                     |
|------|----------------------|----------|----------------------------|--------------|-----------------------------------------------------------------------------------------|--------------------|--------------------|---------------------------------------------------------|---------------------------------------------|---------------------------------------------------------------------------------------------------------------------------------------------------------------------------------------------------------------------|
|      | 施設名                  | 郵便番号     | 住所（都道府県から記載）               | 電話番号         | ウェブサイトURL                                                                               | 初診の電話等を用いた診療の実施の有無 | 再診の電話等を用いた診療の実施の有無 | 対応診療科                                                   | 担当医師名                                       | 対面診療が必要と判断した場合に連携する医療機関名（複数ある場合は複数、住所も併せて記載）                                                                                                                                                                        |
| 1306 | たかねクリニック             | 114-0015 | 東京都北区中里3-17-1              | 03-3949-0442 |                                                                                         | ○                  | ○                  | 内科                                                      | 高根 一郎                                       |                                                                                                                                                                                                                     |
| 1307 | 田中医院                 | 114-0016 | 東京都北区上中里3-6-16             | 03-3913-6627 |                                                                                         |                    | ○                  | 内科 小児科                                                  | 田中孝幸                                        |                                                                                                                                                                                                                     |
| 1308 | 中島クリニック              | 114-0001 | 東京都北区東十条3-1-14             | 03-6915-4700 | <a href="http://www.nakajima-clinic.tokyo">http://www.nakajima-clinic.tokyo</a>         |                    | ○                  | 内科                                                      | 中島 剛                                        |                                                                                                                                                                                                                     |
| 1309 | 東十条さかい糖尿病・内科クリニック    | 114-0001 | 東京都北区東十条4丁目5-16 HJ フレール101 | 03-3914-2000 | <a href="https://www.hjsakai-dmc.com">https://www.hjsakai-dmc.com</a>                   | ○                  | ○                  | 内科                                                      | 堺 弘治                                        |                                                                                                                                                                                                                     |
| 1310 | 明理会中央総合病院            | 114-0001 | 東京都北区東十条3-2-11             | 03-5902-1199 | <a href="https://www.ims.gr.jp/meirikai-chuo/">https://www.ims.gr.jp/meirikai-chuo/</a> |                    | ○                  | 内科<br>心臓外科<br>血管外科<br>整形外科<br>神経内科<br>眼科<br>外科<br>脳神経外科 | 主治医                                         |                                                                                                                                                                                                                     |
| 1311 | メンタルクリニック赤とんぼ        | 114-0034 | 東京都北区上十条3-29-6 ビルヴァンテアン201 | 03-6454-3877 | <a href="http://akatombo-mc.org/">http://akatombo-mc.org/</a>                           |                    | ○                  | 心療内科                                                    | 高橋 えみ子                                      |                                                                                                                                                                                                                     |
| 1312 | 横山医院                 | 114-0032 | 東京都北区中十条2-22-16            | 03-3908-3452 | <a href="http://www.kenjukai.or.jp/">http://www.kenjukai.or.jp/</a>                     | ○                  | ○                  | 内科<br>小児科                                               | 横山 健一                                       |                                                                                                                                                                                                                     |
| 1313 | 渡辺医院                 | 114-0024 | 東京都北区西ヶ原4-48-4             | 03-3910-0380 |                                                                                         | ○                  | ○                  | 内科                                                      | 渡邊壽和                                        |                                                                                                                                                                                                                     |
| 1314 | 医療法人社団隆樹会<br>木村クリニック | 115-0043 | 東京都北区神谷1-15-9              | 03-3911-1220 | <a href="https://kimurahomeclinic.jp/">https://kimurahomeclinic.jp/</a>                 | ○                  | ○                  | 内科<br>小児科                                               | 木村隆雄<br>木村さら<br>宮本哲也<br>生津圭祐<br>渡辺勇<br>藤森文広 | 明理会中央総合病院(東京都北区東十条3丁目2番11号)<br>東京北医療センター(東京都北区赤羽台4-17-56)<br>帝京大学医学部附属病院(東京都板橋区加賀2-11-1)<br>東京大学医学部附属病院(東京都文京区本郷7-3-1)<br>東京医科大学病院(東京都新宿区西新宿6-7-1)<br>日本医科大学附属板橋病院(東京都板橋区大谷口上町30-1)<br>東京都健康長寿医療センター(東京都板橋区栄町35番2号) |

電話や情報通信機器を用いて診療を実施する医療機関の一覧（東京都）

|      | 基本情報                           |          |                               |              |                                                                               | 事務連絡に基づく対応について     |                    |                    |                 |                                                                                         |
|------|--------------------------------|----------|-------------------------------|--------------|-------------------------------------------------------------------------------|--------------------|--------------------|--------------------|-----------------|-----------------------------------------------------------------------------------------|
|      | 施設名                            | 郵便番号     | 住所（都道府県から記載）                  | 電話番号         | ウェブサイトURL                                                                     | 初診の電話等を用いた診療の実施の有無 | 再診の電話等を用いた診療の実施の有無 | 対応診療科              | 担当医師名           | 対面診療が必要と判断した場合に連携する医療機関名（複数ある場合は複数、住所も併せて記載）                                            |
| 1315 | たかの内科クリニック                     | 114-0002 | 東京都北区王子1-10-17 ヒューリック王子ビル5F   | 03-3912-8544 | <a href="https://oji-takano-clinic.com/">https://oji-takano-clinic.com/</a>   | ○                  | ○                  | 内科                 | 野村 和至           |                                                                                         |
| 1316 | 水野医院                           | 114-0014 | 東京都北区田端6-3-20 1階              | 03-3821-3305 | <a href="https://mizuno-iin.com/">https://mizuno-iin.com/</a>                 |                    | ○                  | 内科                 | 水野 雅之           |                                                                                         |
| 1317 | 医療法人社団慈広会<br>西巣鴨こどもクリニック       | 114-0023 | 東京都北区滝野川6-14-9-301            | 03-6903-5025 | <a href="http://www.nishisugamo-child.jp">http://www.nishisugamo-child.jp</a> | ○                  | ○                  | 小児科                | 大久保隆志           | 東北医療センター(東京都北区赤羽台4丁目17-56)<br>東京都立大塚病院(東京都豊島区南大塚2丁目8-1)<br>東京都保健医療公社 豊島病院(東京都板橋区栄町33-1) |
| 1318 | あべクリニック                        | 116-0014 | 東京都荒川区東日暮里6-60-10 日暮里駅前中央ビル5F | 03-5810-7808 | <a href="https://abeclinic.com">https://abeclinic.com</a>                     | ○                  | ○                  | 精神科                | 阿部哲夫            |                                                                                         |
| 1319 | 荒川生協診療所                        | 116-0002 | 東京都荒川区荒川4-54-5                | 03-3802-2601 | <a href="http://arakawaseikyo.com/">http://arakawaseikyo.com/</a>             |                    | ○                  | 内科                 | 田邊 康一<br>伊沢 庸之  |                                                                                         |
| 1320 | 医療法人社団いなばキッズクリニック              | 116-0003 | 東京都荒川区南千住4-7-1 BiVi南千住3階      | 03-5604-1710 | <a href="http://www.inabakids.com">http://www.inabakids.com</a>               | ○                  | ○                  | 小児科                | 稲葉八興 稲葉利佳子      |                                                                                         |
| 1321 | 医療法人社団しんけん会<br>東尾久耳鼻咽喉科・アレルギー科 | 116-0012 | 東京都荒川区東尾久5-23-5インペリアルトパーズ1F   | 03-6240-8741 | <a href="https://higashiogu-ent.com">https://higashiogu-ent.com</a>           | ○                  | ○                  | 耳鼻咽喉科              | 小山 京子           |                                                                                         |
| 1322 | うえだ眼科クリニック                     | 116-0011 | 東京都荒川区西尾久1-12-5 ロジュマン西尾久101   | 03-5692-3100 |                                                                               | ○                  | ○                  | 眼科                 | 上田 裕子           |                                                                                         |
| 1323 | 尾久駅前内科クリニック                    | 116-0011 | 東京都荒川区西尾久7-25-3               | 03-5855-0979 | <a href="http://www.okumed.com/">www.okumed.com/</a>                          | ○                  | ○                  | 内科<br>循環器科<br>神経内科 | 富永 誠一<br>大久保 誠二 |                                                                                         |

電話や情報通信機器を用いて診療を実施する医療機関の一覧（東京都）

|      | 基本情報             |          |                            |              |                                                                                                       | 事務連絡に基づく対応について            |                           |           |                    |                                              |
|------|------------------|----------|----------------------------|--------------|-------------------------------------------------------------------------------------------------------|---------------------------|---------------------------|-----------|--------------------|----------------------------------------------|
|      | 施設名              | 郵便番号     | 住所（都道府県から記載）               | 電話番号         | ウェブサイトURL                                                                                             | 初診の電話等を用いた診療の実施の有無        | 再診の電話等を用いた診療の実施の有無        | 対応診療科     | 担当医師名              | 対面診療が必要と判断した場合に連携する医療機関名（複数ある場合は複数、住所も併せて記載） |
| 1324 | 古賀整形外科           | 116-0012 | 東京都荒川区東尾久3-30-4            | 03-3892-8814 | <a href="http://kogaseikei.jp/index.htm">http://kogaseikei.jp/index.htm</a>                           |                           | ○                         | 整形外科      | 古賀 三郎、渋谷 一行、眞々田 一浩 | 都立駒込病院、三井記念病院、東京通信病院等                        |
| 1325 | 社会医療法人社団一成会 木村病院 | 116-0001 | 東京都荒川区町屋2-3-7              | 03-3892-3161 | <a href="http://www.kimura-hp.or.jp">http://www.kimura-hp.or.jp</a>                                   | ○<br>症状によってお受けできない場合もあります | ○<br>症状によってお受けできない場合もあります | 内科<br>外科  | 各医師                |                                              |
| 1326 | 上智クリニック          | 116-0001 | 東京都荒川区町屋4-9-10             | 03-3892-4514 |                                                                                                       |                           | ○                         | 内科        | 銭谷 平<br>田尾 まゆ子     |                                              |
| 1327 | 鈴木こどもクリニック       | 116-0011 | 東京都荒川区西尾久3丁目21-5 AYビル1F    | 03-5855-3030 |                                                                                                       | ○                         | ○                         | 小児科       | 北爪 勉               |                                              |
| 1328 | 東京女子医科大学東医療センター  | 116-8567 | 東京都荒川区西尾久2-1-10            | 03-3810-1111 | <a href="https://twmu-mce.jp/index.html">https://twmu-mce.jp/index.html</a>                           |                           | ○                         | 全診療科      | 全医師                |                                              |
| 1329 | はたの耳鼻咽喉科         | 116-0003 | 東京都荒川区南千住7-1-1アクレスティ南千住304 | 03-6806-8733 | <a href="https://hatano-jibika.jp/">https://hatano-jibika.jp/</a>                                     | ○                         | ○                         | 耳鼻咽喉科     | 波多野 吟哉             |                                              |
| 1330 | まる福ホームクリニック      | 116-0011 | 東京都荒川区西尾久4-27-3            | 03-6807-9810 | <a href="https://www.marufuku-hc.com">https://www.marufuku-hc.com</a>                                 | ○                         | ○                         | 内科<br>小児科 | 菅野 哲也              | 東京女子医科大学東医療センター（東京都荒川区）                      |
| 1331 | 宮の前診療所           | 116-0011 | 東京都荒川区西尾久2-3-2             | 03-3800-7111 |                                                                                                       | ○                         |                           | 内科        | 山本 藍               |                                              |
| 1332 | 上野小児科医院          | 116-0003 | 東京都荒川区南千住1-13-22           | 03-3806-4970 | <a href="http://uenokids.byoinnavi.jp/p/c/index.html">http://uenokids.byoinnavi.jp/p/c/index.html</a> |                           | ○                         | 小児科       | 上野 正浩              | 東京女子医大東医療センター<br>（東京都荒川区西尾久2丁目1-10）          |

電話や情報通信機器を用いて診療を実施する医療機関の一覧（東京都）

|      | 基本情報          |          |                            |              |                                     | 事務連絡に基づく対応について     |                              |                   |                                                               |                                                                 |
|------|---------------|----------|----------------------------|--------------|-------------------------------------|--------------------|------------------------------|-------------------|---------------------------------------------------------------|-----------------------------------------------------------------|
|      | 施設名           | 郵便番号     | 住所（都道府県から記載）               | 電話番号         | ウェブサイトURL                           | 初診の電話等を用いた診療の実施の有無 | 再診の電話等を用いた診療の実施の有無           | 対応診療科             | 担当医師名                                                         | 対面診療が必要と判断した場合に連携する医療機関名（複数ある場合は複数、住所も併せて記載）                    |
| 1333 | 青山クリニック       | 174-0064 | 東京都板橋区中台3-27 サンシティA101・103 | 03-3931-8888 | https://www.aocli.jp/               |                    | ○                            | 内科<br>小児科         | 青山 友則                                                         | 板橋中央総合病院<br>板橋区医師会病院                                            |
| 1334 | 赤塚眼科はやし医院     | 175-0093 | 東京都板橋区赤塚新町1-24-5           | 03-3938-8900 | http://www.akatsuka-eye-clinic.com/ |                    | ○                            | 眼科                | 林 殿宣                                                          |                                                                 |
| 1335 | 赤塚新町クリニック     | 175-0093 | 東京都板橋区赤塚新町2-5-16ヴィルヌーブ赤塚1F | 03-6915-6617 | https://www.a-h-clinic.com/         | ○                  | ○                            | 内科                | 塩原康正                                                          | 板橋区医師会病院<br>(東京都板橋区高島平3-12-6)                                   |
| 1336 | 小豆沢病院附属高島平診療所 | 175-0082 | 東京都板橋区高島平8-1-1             | 03-3932-3394 |                                     |                    | ○<br>定期受診患者の定期処方のみ医師との電話再診可能 | 内科                | 佐藤 達郎、桑名 慶和其他各曜日の担当医師                                         |                                                                 |
| 1337 | 天木診療所         | 174-0053 | 東京都板橋区清水町47-7              | 03-3961-3913 |                                     |                    | ○                            | 内科<br>小児科         | 天木聡                                                           |                                                                 |
| 1338 | 飯沼病院          | 174-8680 | 東京都板橋区常盤台2-33-15           | 03-3960-0091 | http://www.iinuma-hp.com            |                    | ○                            | 内科<br>心療内科<br>精神科 | 山路朋久<br>大野裕治<br>飯沼久美子<br>齋藤令子<br>湊口龍<br>阿部察貴男<br>小林勉<br>五十嵐紀之 |                                                                 |
| 1339 | 石澤内科クリニック     | 174-0056 | 東京都板橋区志村2-10-9             | 03-3966-1438 | http://ishizawa-clinic.net/         |                    | ○                            | 内科                | 石澤 将                                                          | 板橋区医師会病院（東京都板橋区高島平3丁目12-6）<br>板橋中央総合病院（東京都板橋区小豆沢2-12-7）         |
| 1340 | いたばし・ハートクリニック | 173-0004 | 東京都板橋区板橋1-21-7 聖楽ビル1階      | 03-5248-0880 | http://www.itabashi-heart.com       |                    | ○                            | 内科<br>循環器内科       | 原田 忠宜                                                         |                                                                 |
| 1341 | 板橋区役所前診療所     | 173-0013 | 東京都板橋区氷川町1-12 コスモディエース3階   | 03-5375-9031 | http://ita-shinryujo.jp/            |                    | ○                            | 内科                | 島田 潔<br>鈴木陽一<br>浅海 直<br>安井宏仁<br>三寺隆之<br>御子柴路朗<br>糸山 智         | 平成ホームクリニック（東京都板橋区向原三丁目7-7-2階）<br>平成ゆうわクリニック（埼玉県戸田市新曽南4-2-35-1階） |

電話や情報通信機器を用いて診療を実施する医療機関の一覧（東京都）

|      | 基本情報                        |          |                                |              |                                   | 事務連絡に基づく対応について     |                    |                                                                 |                                  |                                              |
|------|-----------------------------|----------|--------------------------------|--------------|-----------------------------------|--------------------|--------------------|-----------------------------------------------------------------|----------------------------------|----------------------------------------------|
|      | 施設名                         | 郵便番号     | 住所（都道府県から記載）                   | 電話番号         | ウェブサイトURL                         | 初診の電話等を用いた診療の実施の有無 | 再診の電話等を用いた診療の実施の有無 | 対応診療科                                                           | 担当医師名                            | 対面診療が必要と判断した場合に連携する医療機関名（複数ある場合は複数、住所も併せて記載） |
| 1342 | 板橋すばる眼科                     | 173-0016 | 東京都板橋区中板橋20-5-302              | 03-6905-3511 | http://www.subaru-eye.com         | ○                  | ○                  | 眼科                                                              | 菅波 絵理                            | 板橋区医師会病院（東京都板橋区高島平3丁目12-6）                   |
| 1343 | 板橋セントラルクリニック                | 174-0051 | 東京都板橋区小豆沢2-16-15               | 03-3967-1268 | http://www.ims.gr.jp/itabashi.hp/ |                    | ○                  | 皮膚科<br>眼科<br>小児科                                                | 問わず                              |                                              |
| 1344 | 板橋中央総合病院                    | 174-0051 | 東京都板橋区小豆沢1-12-7                | 03-3967-1181 | http://www.ims.gr.jp/itabashi.hp/ |                    | ○                  | 内科<br>腎臓内科<br>血液内科<br>リウマチ科<br>糖尿病内科<br>脳神経内科<br>呼吸器内科<br>循環器内科 | 問わず                              |                                              |
| 1345 | イムス板橋健診クリニック                | 174-0051 | 東京都板橋区小豆沢2-23-15               | 03-3967-1515 | https://www.ims.gr.jp/kenshin/    | ○                  | ○                  | 内科・循環器内科                                                        | 平 久美子                            |                                              |
| 1346 | イムス記念病院                     | 174-0071 | 東京都板橋区常盤台4-25-5                | 03-3932-9181 | http://www.ims.gr.jp/ims-kinen/   | ○                  | ○                  | 全診療科                                                            | 主治医                              |                                              |
| 1347 | 医療法人社団かのう会<br>かのう耳鼻咽喉科クリニック | 173-0004 | 東京都板橋区板橋1-53-10-2F2B           | 03-6905-3387 | www.kano-jibi.jp                  |                    | ○                  | 耳鼻科<br>小児耳鼻科                                                    | 加納 章子<br>梓澤 陽子<br>藤 希欧伊<br>北見 エミ |                                              |
| 1348 | 医療法人社団 ぐんだくりニック             | 175-0082 | 東京都板橋区高島平2-33-1 ピーコックストア高島平店2階 | 03-5922-5377 | https://gonda-cl.com              |                    | ○                  | 内科<br>消化器外科<br>肛門外科                                             | 権田 剛                             |                                              |
| 1349 | 医療法人社団慈誠会<br>東武練馬中央病院       | 175-0083 | 東京都板橋区徳丸3-19-1                 | 03-3934-1611 | http://www.tobunerima-hospital.jp |                    | ○                  | 内科                                                              | 森<br>小澤<br>小池<br>吉居              |                                              |
| 1350 | 医療法人社団仁恕会<br>メンタルクリニックいたばし  | 173-0004 | 東京都板橋区板橋1-21-5 1,2F            | 03-3961-9603 | http://www.mental-clinic.net/     | ○                  | ○                  | 精神科                                                             | 高橋 彰久<br>関口 緑                    |                                              |

電話や情報通信機器を用いて診療を実施する医療機関の一覧（東京都）

|      | 基本情報                          |          |                                   |              |                                         | 事務連絡に基づく対応について     |                    |                     |                        |                                                                  |
|------|-------------------------------|----------|-----------------------------------|--------------|-----------------------------------------|--------------------|--------------------|---------------------|------------------------|------------------------------------------------------------------|
|      | 施設名                           | 郵便番号     | 住所（都道府県から記載）                      | 電話番号         | ウェブサイトURL                               | 初診の電話等を用いた診療の実施の有無 | 再診の電話等を用いた診療の実施の有無 | 対応診療科               | 担当医師名                  | 対面診療が必要と判断した場合に連携する医療機関名（複数ある場合は複数、住所も併せて記載）                     |
| 1351 | 医療法人社団多比良医院                   | 175-0094 | 東京都板橋区成増4-13-2-1階                 | 03-3975-8139 | https://tairai.in.jp                    |                    | ○                  | 内科<br>小児科           | 多比良 清                  | 板橋区医師会病院（東京都板橋区高島平3-12-6）                                        |
| 1352 | 医療法人財団 同潤会<br>富士見病院           | 173-0012 | 東京都板橋区大和町14番16号                   | 03-3962-2431 | https://www.fujimi-hp.or.jp/gairai.html |                    | ○                  | 内科<br>外科胃腸科<br>泌尿器科 | 各外来担当医                 |                                                                  |
| 1353 | 医療法人社団 ふるた小<br>児クリニック         | 175-0083 | 東京都板橋区徳丸2-21-8                    | 03-3932-7800 |                                         |                    | ○                  | 小児科                 | 古田俊哉                   |                                                                  |
| 1354 | 医療法人社団翠会<br>みどりの杜クリニック        | 175-0094 | 東京都板橋区成増5-6-3                     | 03-5967-2770 | http://www.mhcg.or.jp/midorinomori/     | ○                  | ○                  | 精神科                 | 森川すいめい<br>北 麻希子        |                                                                  |
| 1355 | おおの内科クリニック                    | 173-0004 | 東京都板橋区板橋1-36-1 TYビル3F             | 03-3963-5521 | http://www.ohnomc.tokyo.jp/             | ○                  | ○                  | 内科                  | 大野 安実<br>大野 美穂<br>佐伯 仁 |                                                                  |
| 1356 | 大森メディカルクリニッ<br>ク              | 174-0065 | 東京都板橋区若木1-17-17                   | 03-5921-0755 |                                         |                    | ○                  | 内科                  | 大森 千春                  | 板橋区医師会病院（東京都板橋区高島平3丁目12-6）                                       |
| 1357 | 大山東方クリニック                     | 173-0014 | 東京都板橋区大山東町60-9                    | 03-3964-1830 |                                         | ○                  | ○                  | 内科<br>外科            | 小出 雅彦                  | 東京都長寿医療センター                                                      |
| 1358 | 金谷整形外科<br>せぼね・骨粗しょう症ク<br>リニック | 174-0056 | 東京都板橋区志村二丁目10番1号<br>PLAZA NIKI 1階 | 03-3965-5252 | https://kanaya-seikei.com               |                    | ○                  | 整形外科                | 金谷 幸一                  | 東京都健康長寿医療センター<br>住所：東京都板橋区栄町35-2                                 |
| 1359 | 亀井消化器内科クリニッ<br>ク              | 175-0094 | 東京都板橋区成増1-28-15林屋ビル2F             | 03-3976-4180 |                                         |                    | ○                  | 内科<br>消化器内科         | 亀井 明                   | 東京都健康長寿医療センター<br>（東京都板橋区栄町35-2）<br>板橋区医師会病院<br>（東京都板橋区高島平-12-16） |

電話や情報通信機器を用いて診療を実施する医療機関の一覧（東京都）

|      | 基本情報                     |          |                            |              |                                             | 事務連絡に基づく対応について     |                                                 |                                                           |                                         |                                              |
|------|--------------------------|----------|----------------------------|--------------|---------------------------------------------|--------------------|-------------------------------------------------|-----------------------------------------------------------|-----------------------------------------|----------------------------------------------|
|      | 施設名                      | 郵便番号     | 住所（都道府県から記載）               | 電話番号         | ウェブサイトURL                                   | 初診の電話等を用いた診療の実施の有無 | 再診の電話等を用いた診療の実施の有無                              | 対応診療科                                                     | 担当医師名                                   | 対面診療が必要と判断した場合に連携する医療機関名（複数ある場合は複数、住所も併せて記載） |
| 1360 | 亀田整形外科                   | 175-0083 | 東京都板橋区徳丸2-3-10久美ビル1F       | 03-3933-9988 | https://www.kameda-seikei.com/              | ○                  | ○                                               | 整形外科                                                      | 吉田 弘範                                   |                                              |
| 1361 | 共助会医院                    | 174-0051 | 東京都板橋区小豆沢2-26-8            | 03-5924-0266 | http://kyoujyokai.com/                      | ○                  | ○                                               | 内科<br>小児科                                                 | 堀内                                      | 豊島病院<br>日大病院<br>健康長寿医療センター<br>帝京病院           |
| 1362 | 楠医院                      | 175-0092 | 東京都板橋区赤塚6-23-14            | 03-3939-0096 | https://www.kusunoki-clinic.jp/             |                    | ○                                               | 内科<br>産婦人科<br>泌尿器科                                        | 板倉宏尚<br>板倉伊吹                            |                                              |
| 1363 | 公益財団法人 愛世会<br>愛誠病院       | 173-8588 | 東京都板橋区加賀1-3-1              | 03-3961-5351 | http://www.aisei-byouin.or.jp/              |                    | ○                                               | 内科<br>外科<br>整形外科<br>循環器内科<br>糖尿病内科<br>神経内科<br>漢方内科<br>皮膚科 | 松原Dr<br>川上Dr<br>玉山Dr<br>島田Dr<br>その他担当Dr |                                              |
| 1364 | 公益財団法人東京都保健<br>医療公社 豊島病院 | 173-0015 | 東京都板橋区栄町33-1               | 03-5375-1234 | http://www.toshima-hp.jp                    |                    | ○<br>当院通院中の患者で定期的受診であって、医師が電話診療可能と判断した患者さんのみを対象 | 全科                                                        | 外来担当医師                                  |                                              |
| 1365 | 幸南クリニック                  | 173-0034 | 東京都板橋区幸町23-7コモディイイダ幸町店別館1F | 03-5917-3900 | http://konanc.jp/                           | ○<br>初診は受診歴のある方のみ  | ○                                               | 内科                                                        | 加藤富嗣<br>伊藤嘉恭<br>植田文博                    |                                              |
| 1366 | こうのファミリーケア・<br>クリニック     | 174-0056 | 東京都板橋区志村3-20-26-1階         | 03-3965-1649 | http://www013.upp.sonet.ne.jp/Kouno-clinic/ | ○                  | ○                                               | 内科<br>小児科                                                 | 河野 嘉英                                   | 豊島病院（東京都板橋区栄町33-1）                           |
| 1367 | さいしょ小児科                  | 174-0074 | 東京都板橋区東新町2-56-9SOB春原ビル101  | 03-5986-1271 | http://www5e.biglobe.ne.jp/~saisisho/       | ○                  | ○                                               | 小児科<br>内科                                                 | 税所純敬                                    |                                              |
| 1368 | サンシティ耳鼻咽喉科               | 174-0064 | 東京都板橋区中台3-27-7-2F          | 03-5922-4187 | http://suncity-ent.com                      | ○                  | ○                                               | 耳鼻咽喉科                                                     | 鈴木 佳吾                                   |                                              |



電話や情報通信機器を用いて診療を実施する医療機関の一覧（東京都）

|      | 基本情報            |          |                              |              |                                             | 事務連絡に基づく対応について     |                    |                                               |                        |                                                                                  |
|------|-----------------|----------|------------------------------|--------------|---------------------------------------------|--------------------|--------------------|-----------------------------------------------|------------------------|----------------------------------------------------------------------------------|
|      | 施設名             | 郵便番号     | 住所（都道府県から記載）                 | 電話番号         | ウェブサイトURL                                   | 初診の電話等を用いた診療の実施の有無 | 再診の電話等を用いた診療の実施の有無 | 対応診療科                                         | 担当医師名                  | 対面診療が必要と判断した場合に連携する医療機関名（複数ある場合は複数、住所も併せて記載）                                     |
| 1369 | 慈誠会前野病院         | 174-0063 | 東京都板橋区前野町6-38-3              | 03-3969-1511 | http://maeno-hospital.jp/                   |                    | ○                  | 内科                                            | 内科すべての医師               |                                                                                  |
| 1370 | 志村坂上あおき眼科       | 174-0051 | 東京都板橋区小豆沢2-15-11             | 03-3967-1146 | https://aoki-eyeclinic.com/                 |                    | ○                  | 眼科                                            | 青木 彩                   |                                                                                  |
| 1371 | 下赤塚診療所          | 175-0092 | 東京都板橋区赤塚2-9-4                | 03-3979-6361 | http://www.kenbun.or.jp/                    |                    | ○                  | 内科                                            | 鹿戸 福子                  | 東京都健康長寿医療センター（板橋区栄町36-2）<br>日本大学医学部附属板橋病院（板橋区大谷口上町30-1）<br>帝京大学付属病院（板橋区加賀2-11-1） |
| 1372 | 荘病院             | 173-0004 | 東京都板橋区板橋1-41-14              | 03-3963-0551 | http://www.sho-hospital.jp/usr/pc/index.php |                    | ○                  | 婦人科                                           | 荘 隆一郎                  |                                                                                  |
| 1373 | 心身障害児総合医療療育センター | 173-0037 | 東京都板橋区小茂根1-1-10              | 03-3974-2146 | https://www.ryouiku-net.com/                |                    | ○                  | 整形外科<br>小児科<br>精神科                            | 伊藤 順一<br>中谷 勝利<br>米山 明 |                                                                                  |
| 1374 | すがやこどもクリニック     | 174-0051 | 東京都板橋区小豆沢2-36-13マツエクリニックビル3階 | 03-5914-3777 | http://www.sugaya-clinic.com/               | ○                  | ○                  | 小児科                                           | 菅谷明則                   |                                                                                  |
| 1375 | 杉内医院            | 175-0094 | 東京都板橋区成増3-17-16              | 03-3930-2331 |                                             | ○                  | ○                  | 小児科<br>内科                                     | 杉内 孝謙                  | 板橋区医師会病院（東京都板橋区高島平3-12-6）                                                        |
| 1376 | 誠志会病院           | 174-0043 | 東京都板橋区坂下1-40-2               | 03-3968-2621 | http://www.seisikai.or.jp                   | ○                  | ○                  | 内科                                            | 内野啓子<br>福井容子           |                                                                                  |
| 1377 | 高島平中央総合病院       | 175-0082 | 東京都板橋区高島平1-73-1              | 03-3936-7451 | https://takasimadaira-hospital.jp           |                    | ○                  | 内科、消化器科、整形外科、脳神経外科、乳腺外科、形成外科、小児科、耳鼻咽喉科、皮膚科、眼科 | 各担当医                   |                                                                                  |

電話や情報通信機器を用いて診療を実施する医療機関の一覧（東京都）

|      | 基本情報           |          |                           |              |                                                                                       | 事務連絡に基づく対応について     |                    |                                                  |                                                                       |                                              |
|------|----------------|----------|---------------------------|--------------|---------------------------------------------------------------------------------------|--------------------|--------------------|--------------------------------------------------|-----------------------------------------------------------------------|----------------------------------------------|
|      | 施設名            | 郵便番号     | 住所（都道府県から記載）              | 電話番号         | ウェブサイトURL                                                                             | 初診の電話等を用いた診療の実施の有無 | 再診の電話等を用いた診療の実施の有無 | 対応診療科                                            | 担当医師名                                                                 | 対面診療が必要と判断した場合に連携する医療機関名（複数ある場合は複数、住所も併せて記載） |
| 1378 | 高島平2丁目整形外科     | 175-0082 | 東京都板橋区高島平2-22-2           | 03-5399-1231 |                                                                                       |                    | ○                  | 整形外科                                             | 鈴木英弘<br>長田知也<br>川上順子                                                  |                                              |
| 1379 | 田島クリニック        | 175-0094 | 東京都板橋区成増5-18-4            | 03-5383-6622 |                                                                                       | ○                  | ○                  | 内科                                               | 林 潤洙                                                                  |                                              |
| 1380 | 田幡医院           | 175-0083 | 東京都板橋区徳丸3-13-9            | 03-3933-1627 | <a href="http://www.tabatain.com">http://www.tabatain.com</a> ...                     | ○                  | ○                  | 内科                                               | 田幡 雅彦                                                                 | 板橋区医師会病院（東京都板橋区高島平3-12-6）                    |
| 1381 | 帝京大学医学部附属病院    | 173-8606 | 東京都板橋区加賀2-11-1            | 03-3964-1211 | <a href="http://www.teikyo-hospital.jp/">http://www.teikyo-hospital.jp/</a>           |                    | ○                  | 全診療科                                             | 全担当医                                                                  |                                              |
| 1382 | 東京シティクリニック大山   | 173-0023 | 東京都板橋区大山町9-6 大山EMPビル2F    | 03-3955-2200 | <a href="https://tokyocityclinic-ooyama.com/">https://tokyocityclinic-ooyama.com/</a> | ○                  | ○                  | 内科<br>小児科                                        | 菱木 三佳乃                                                                |                                              |
| 1383 | 東京腎泌尿器センター大和病院 | 173-0001 | 東京都板橋区本町36-3              | 03-5943-2411 | <a href="https://www.ims.gr.jp/yamato/">https://www.ims.gr.jp/yamato/</a>             |                    | ○                  | 全診療科                                             | 担当医                                                                   |                                              |
| 1384 | 東京都健康長寿医療センター  | 173-0015 | 東京都板橋区栄町35番2号             | 03-3964-1141 | <a href="https://www.tmgig.jp/hospital/">https://www.tmgig.jp/hospital/</a>           |                    | ○                  | 全科                                               | 各診療科担当医                                                               |                                              |
| 1385 | 常盤台外科病院        | 174-0071 | 東京都板橋区常盤台2-25-20          | 03-3960-7211 | <a href="http://tokiwadai-geka.jp/">http://tokiwadai-geka.jp/</a>                     |                    | ○                  | 整形外科<br>脳神経外科<br>形成外科<br>外科<br>内科<br>皮膚科<br>泌尿器科 | 金子 信之<br>大澤 俊雄<br>村上 宏史<br>洪 理江<br>瀬下 崇<br>望月 龍二<br>沼本ロバート知彦<br>小暮 太郎 |                                              |
| 1386 | ときわ台中眼科        | 174-0071 | 東京都板橋区常盤台1-2-3- 新光常盤台ビル4階 | 03-5915-2003 | <a href="https://muranaka-ganka.com/">https://muranaka-ganka.com/</a>                 |                    | ○                  | 眼科                                               | 村中 公正                                                                 | 徳丸村中眼科                                       |

電話や情報通信機器を用いて診療を実施する医療機関の一覧（東京都）

|      | 基本情報           |          |                               |               |                                                                                                               | 事務連絡に基づく対応について     |                     |                                                                              |                |                                              |
|------|----------------|----------|-------------------------------|---------------|---------------------------------------------------------------------------------------------------------------|--------------------|---------------------|------------------------------------------------------------------------------|----------------|----------------------------------------------|
|      | 施設名            | 郵便番号     | 住所（都道府県から記載）                  | 電話番号          | ウェブサイトURL                                                                                                     | 初診の電話等を用いた診療の実施の有無 | 再診の電話等を用いた診療の実施の有無  | 対応診療科                                                                        | 担当医師名          | 対面診療が必要と判断した場合に連携する医療機関名（複数ある場合は複数、住所も併せて記載） |
| 1387 | 徳丸村中眼科         | 175-0083 | 東京都板橋区徳丸5-3-4                 | 03-5920-2003  | <a href="https://muranaka-ganka.com/">https://muranaka-ganka.com/</a>                                         |                    | ○                   | 眼科                                                                           | 久保 玲子          | ときわ台中眼科                                      |
| 1388 | 徳山内科外科         | 107-0043 | 東京都板橋区坂下3-12-10               | 03-3966-8737  |                                                                                                               |                    | ○                   | 内科・神経内科<br>外科・整形外科                                                           | 徳山 仲根<br>徳山 承明 |                                              |
| 1389 | 中小路整形リハビリクリニック | 174-0043 | 東京都板橋区坂下2-15-5                | 03-5393-2477  | <a href="http://www.nakakohjircl.com">http://www.nakakohjircl.com</a>                                         |                    | ○                   | 整形外科                                                                         | 中小路拓           | 板橋区医師会病院                                     |
| 1390 | なかむらクリニック      | 174-0056 | 東京都板橋区志村1-12-6                | 03-5948-7378  |                                                                                                               |                    | ○                   | 内科                                                                           | 中村 直也          |                                              |
| 1391 | 成増眼科医院         | 175-0094 | 東京都板橋区成増2-17-30               | 03-5997-9421  |                                                                                                               |                    | ○                   | 眼科                                                                           | 清水 敬子          | 板橋区医師会病院（東京都板橋区高島平3-12-6）                    |
| 1392 | 成増高橋眼科         | 175-0094 | 東京都板橋区成増1-13-6 田中ビル2F         | 03-39979-6726 |                                                                                                               |                    | ○                   | 眼科                                                                           | 高橋賢一郎<br>高橋恵実  |                                              |
| 1393 | 日本大学医学部附属板橋病院  | 173-8610 | 東京都板橋区大谷口上町30番1号              | 03-3972-8111  | <a href="http://www.med.nihon-u.ac.jp/hospital/itabashi/">http://www.med.nihon-u.ac.jp/hospital/itabashi/</a> |                    | ○<br>対面診療が必要となる場合あり | 総合科、血液・膠原病内科、腎臓・高血圧・内分泌内科、糖尿病・代謝内科、循環器内科、呼吸器内科、消化器・肝臓内科、心療内科、脳神経内科、小児科、産科、眼科 | 各担当医           |                                              |
| 1394 | ねぎし整形外科クリニック   | 175-0082 | 東京都板橋区高島平2-33-1 F ピーコックスストア2F | 03-6906-6226  |                                                                                                               |                    | ○                   | 整形外科<br>リウマチ科<br>ペインクリニック<br>ク外科                                             | 根岸 慎一          |                                              |
| 1395 | ねや内科クリニック      | 175-0083 | 東京都板橋区徳丸5-3-22                | 03-5922-5100  | <a href="http://www.neya-naika.jp">http://www.neya-naika.jp</a>                                               |                    | ○                   | 内科<br>循環器内科                                                                  | 瀬屋和雄           | 板橋区医師会病院<br>（東京都板橋区高島平3-12-6）                |

電話や情報通信機器を用いて診療を実施する医療機関の一覧（東京都）

|      | 基本情報          |          |                           |              |                                         | 事務連絡に基づく対応について     |                    |             |          |                                                                                             |
|------|---------------|----------|---------------------------|--------------|-----------------------------------------|--------------------|--------------------|-------------|----------|---------------------------------------------------------------------------------------------|
|      | 施設名           | 郵便番号     | 住所（都道府県から記載）              | 電話番号         | ウェブサイトURL                               | 初診の電話等を用いた診療の実施の有無 | 再診の電話等を用いた診療の実施の有無 | 対応診療科       | 担当医師名    | 対面診療が必要と判断した場合に連携する医療機関名（複数ある場合は複数、住所も併せて記載）                                                |
| 1396 | 野村医院          | 173-0004 | 東京都板橋区板橋2-65-10-2F        | 03-3964-8544 | http://nomura-clinic.com/               | ○                  | ○                  | 内科          | 野村 和至    |                                                                                             |
| 1397 | 野村循環器科内科クリニック | 173-0014 | 東京都板橋区大山東町18-4 北岡ビル2階     | 03-5375-3711 | http://www.nomuraclinic.com             |                    | ○                  | 循環器内科<br>内科 | 野村 周三    |                                                                                             |
| 1398 | はせがわ眼科        | 175-0094 | 東京都板橋区成増2-14-5 EH第二ビル2階A室 | 03-5998-1222 | https://www.narimasuekimae-hasegawa.com |                    | ○                  | 眼科          | 長谷川 裕基   |                                                                                             |
| 1399 | 早川医院          | 173-0026 | 東京都板橋区中丸町9-1              | 03-3972-6162 |                                         | ○                  | ○                  | 内科<br>小児科   | 早川 洋     | 日本大学医学部附属板橋病院<br>帝京大学医学部附属病院<br>健康長寿医療センター<br>東京都保健医療公社 豊島病院                                |
| 1400 | 林クリニック        | 173-0037 | 東京都板橋区小茂根4-28-14          | 03-3956-2090 | hayashi-medical.com                     | ○                  | ○                  | 内科<br>小児科   | 林滋<br>林毅 | 板橋区医師会病院（東京都高島平3-12-6）                                                                      |
| 1401 | 光が丘クリニック      | 175-0093 | 東京都板橋区赤塚新町3-32-12-204     | 03-5968-3030 | https://hikarigaokaclinic.com/          | ○                  | ○                  | 内科          | 徳安 良紀    |                                                                                             |
| 1402 | 平沼クリニック       | 173-0004 | 東京都板橋区板橋2-16-6            | 03-6784-1190 | https://www.hiranuma-clinic.net/        |                    | ○                  | 内科          | 平沼 孝之    |                                                                                             |
| 1403 | 平山医院          | 174-0064 | 東京都板橋区中台1-46-3            | 03-3932-3598 |                                         | ○                  | ○                  | 小児科<br>内科   | 平山貴度     | 板橋区医師会病院                                                                                    |
| 1404 | 藤田医院          | 174-0055 | 東京都板橋区泉町23-8-1 F          | 03-3960-2822 | http://www.fujitaiin.org/               |                    | ○                  | 内科<br>小児科   | 藤田雅巳     | 日本大学医学部附属病院（東京都板橋区大谷口上町30-1）<br>東京都保健医療公社 豊島病院（東京都板橋区栄町33-1）<br>東京都健康長寿医療センター（東京都板橋区栄町35-2） |

電話や情報通信機器を用いて診療を実施する医療機関の一覧（東京都）

|      | 基本情報          |          |                              |              |                                                                      | 事務連絡に基づく対応について     |                    |                            |                       |                                                               |
|------|---------------|----------|------------------------------|--------------|----------------------------------------------------------------------|--------------------|--------------------|----------------------------|-----------------------|---------------------------------------------------------------|
|      | 施設名           | 郵便番号     | 住所（都道府県から記載）                 | 電話番号         | ウェブサイトURL                                                            | 初診の電話等を用いた診療の実施の有無 | 再診の電話等を用いた診療の実施の有無 | 対応診療科                      | 担当医師名                 | 対面診療が必要と判断した場合に連携する医療機関名（複数ある場合は複数、住所も併せて記載）                  |
| 1405 | 双葉町クリニック      | 173-0011 | 東京都板橋区双葉町12-17               | 03-3961-8060 | http://www.futabacho-cl.com/                                         |                    | ○                  | 内科<br>アレルギー科小<br>児科<br>皮膚科 | 清水園子                  | 板橋区医師会病院（東京都板橋区高島平3丁目12-6）                                    |
| 1406 | 平成ホームクリニック    | 173-0036 | 東京都板橋区向原三丁目7-7 コーシャイム向原7号棟2階 | 03-5926-4491 |                                                                      |                    | ○                  | 内科                         | 藤井秀樹<br>伊藤 直<br>長谷川大輔 | 平成ゆうわクリニック（埼玉県戸田市新曽南4-2-35-1階）<br>板橋区役所前診療所（東京都板橋区水川町1-12-3階） |
| 1407 | まえだファミリークリニック | 175-0092 | 東京都板橋区赤塚3-9-1リパティカイト1F       | 03-3979-0901 | https://www.maeda-family.jp/                                         | ○                  | ○                  | 内科<br>小児科<br>心療内科<br>精神科   | 前田 修司                 |                                                               |
| 1408 | まつもとクリニック     | 174-0056 | 東京都板橋区志村2-10-1-1F            | 03-3558-7117 | http://matsu-cl.jp                                                   |                    | ○                  | 内科                         | 松本浩次                  | 板橋中央総合病院                                                      |
| 1409 | 水野医院          | 175-0093 | 東京都板橋区赤塚新町一丁目17-1            | 03-3559-2111 |                                                                      |                    | ○                  | 内科<br>脳神経外科                | 水野 重樹                 | 板橋区医師会病院<br>（東京都板橋区高島平3-12-6）                                 |
| 1410 | みなくちクリニック     | 175-0083 | 東京都板橋区徳丸2-14-8               | 03-6785-3791 |                                                                      |                    | ○                  | 内科<br>外科                   | 水口博之                  | 板橋区医師会病院                                                      |
| 1411 | 宮田医院          | 175-0082 | 東京都板橋区高島平8-12-9              | 03-3559-8480 | https://www.itb.tokyo.med.or.jp/kikan/byoin/kobetsu_base.html?id=270 |                    | ○                  | 内科<br>小児科                  | 宮田隆<br>宮田久裕           | 板橋区医師会病院（東京都板橋区高島平3-2-6）                                      |
| 1412 | やごうクリニック      | 174-0071 | 東京都板橋区常盤台3-24-13 ホワイトクロス5 1階 | 03-5915-5500 | https://www.itb.tokyo.med.or.jp/kikan/byoin/kobetsu_base.html?id=169 |                    | ○                  | 内科<br>消化器内科                | 矢郷 祐三                 |                                                               |
| 1413 | 山倉医院          | 173-0031 | 東京都板橋区大谷口北町51-2              | 03-3956-2626 |                                                                      |                    | ○                  | 内科小児科                      | 徳永誠／由子                | 日大板橋病院 東京都健康長寿医療センター                                          |

電話や情報通信機器を用いて診療を実施する医療機関の一覧（東京都）

|      | 基本情報                     |          |                                  |              |                                                                                           | 事務連絡に基づく対応について     |                    |                   |       |                                                                                   |
|------|--------------------------|----------|----------------------------------|--------------|-------------------------------------------------------------------------------------------|--------------------|--------------------|-------------------|-------|-----------------------------------------------------------------------------------|
|      | 施設名                      | 郵便番号     | 住所（都道府県から記載）                     | 電話番号         | ウェブサイトURL                                                                                 | 初診の電話等を用いた診療の実施の有無 | 再診の電話等を用いた診療の実施の有無 | 対応診療科             | 担当医師名 | 対面診療が必要と判断した場合に連携する医療機関名（複数ある場合は複数、住所も併せて記載）                                      |
| 1414 | 山櫻診療所                    | 174-0076 | 東京都板橋区上板橋3-15-5                  | 03-3933-8739 |                                                                                           |                    | ○                  | 内科小児科             | 山田由紀  |                                                                                   |
| 1415 | よつくら医院                   | 174-0063 | 東京都板橋区前野町2-3-17                  | 03-3969-0250 |                                                                                           |                    | ○                  | 泌尿器科              | 四倉正己  | 板橋区医師会病院                                                                          |
| 1416 | 渡辺医院                     | 173-0016 | 東京都板橋区中板橋26-6                    | 03-3964-0831 | <a href="https://www.watanabe-iin.com/">https://www.watanabe-iin.com/</a>                 |                    | ○                  | 整形外科<br>内科<br>皮膚科 | 渡辺 仁  | 板橋区医師会病院（東京都板橋区高島平3-12-6）                                                         |
| 1417 | 渡辺産婦人科医院                 | 175-0082 | 東京都板橋区高島平2-3-14                  | 03-5399-3008 | <a href="http://www.watanabe-sanfu-clinic.com/">http://www.watanabe-sanfu-clinic.com/</a> | ○                  | ○                  | 産婦人科<br>小児科       | 渡邊 哲也 | 板橋区医師会病院<br>（東京都板橋区高島平3-12-6）                                                     |
| 1418 | 板橋幸町クリニック                | 173-0034 | 東京都板橋区幸町21-13プラザさいわい1F           | 03-5966-5801 |                                                                                           | ○                  | ○                  | 内科                | 横山卓司  | 日本大学医学部付属板橋病院（板橋区大谷口上町30-1）<br>豊島病院（板橋区栄町33-1）<br>健康長寿医療センター（板橋区栄町35-2）           |
| 1419 | 中川医院                     | 174-0071 | 東京都板橋区常盤台1-12-1                  | 03-3969-9421 |                                                                                           | ○                  | ○                  | 眼科                | 中川 哲郎 |                                                                                   |
| 1420 | 医療法人社団ナイズ<br>キャップクリニック板橋 | 175-0083 | 東京都板橋区徳丸二丁目6番1号イオン板橋ショッピングセンター4階 | 03-6906-6397 | <a href="https://caps-clinic.jp/itabashi/">https://caps-clinic.jp/itabashi/</a>           | ○                  | ○                  | 小児科               | 白岡亮平  | 練馬光が丘病院（東京都練馬区光が丘2-11-1）<br>帝京大学医学部附属（東京都板橋区加賀2丁目11-1）<br>河北総合病院（東京都杉並区阿谷北 1-7-3） |
| 1421 | おおやま耳鼻咽喉科・アレルギー科         | 173-0023 | 東京都板橋区大山町9-6 大山EMPビル3F           | 03-3972-3387 | <a href="https://ooyama-ent.com/">https://ooyama-ent.com/</a>                             | ○                  | ○                  | 耳鼻咽喉科<br>アレルギー科   | 菊地 仁  |                                                                                   |
| 1422 | いくこ皮膚科クリニック              | 177-0044 | 東京都練馬区上石神井1-14-4エソール2F-B         | 03-5927-5200 | <a href="https://ikuko-hifuka.com/">https://ikuko-hifuka.com/</a>                         | ○                  | ○                  | 皮膚科               | 末原郁子  |                                                                                   |

電話や情報通信機器を用いて診療を実施する医療機関の一覧（東京都）

|      | 基本情報                     |          |                     |              |                                                                                                           | 事務連絡に基づく対応について     |                    |           |                |                                                     |
|------|--------------------------|----------|---------------------|--------------|-----------------------------------------------------------------------------------------------------------|--------------------|--------------------|-----------|----------------|-----------------------------------------------------|
|      | 施設名                      | 郵便番号     | 住所（都道府県から記載）        | 電話番号         | ウェブサイトURL                                                                                                 | 初診の電話等を用いた診療の実施の有無 | 再診の電話等を用いた診療の実施の有無 | 対応診療科     | 担当医師名          | 対面診療が必要と判断した場合に連携する医療機関名（複数ある場合は複数、住所も併せて記載）        |
| 1423 | 石黒内科クリニック                | 176-0004 | 東京都練馬区小竹町2-81-8     | 03-5917-6100 | <a href="http://www.ishiguro-clinic.com/">http://www.ishiguro-clinic.com/</a>                             | ○                  | ○                  | 内科        | 石黒久貴           |                                                     |
| 1424 | 医療法人財団厚生協会<br>大泉病院       | 178-0061 | 東京都練馬区大泉学園町6-9-1    | 03-3924-2111 | <a href="https://www.oizumibyoin.jp/">https://www.oizumibyoin.jp/</a>                                     |                    | ○                  | 精神科       | 主治医            |                                                     |
| 1425 | 医療法人財団 秀行会<br>阿部クリニック    | 176-0002 | 東京都練馬区桜台二丁目1番7号     | 03-3992-1103 | <a href="http://www.syukoukai.or.jp/group/abe_top.html">http://www.syukoukai.or.jp/group/abe_top.html</a> |                    | ○                  | 内科<br>小児科 | 中村 哲郎          |                                                     |
| 1426 | 医療法人社団アップル会<br>藤澤皮膚科     | 178-0063 | 東京都練馬区東大泉1-37-14-2階 | 03-3925-8947 | <a href="http://fujisawahifuka.com/">http://fujisawahifuka.com/</a>                                       | ○                  | ○                  | 皮膚科       | 藤澤重樹<br>藤澤大輔   | 日大板橋病院（東京都板橋区大谷口上町30-1）<br>順天堂練馬病院（東京都練馬区高野台3-1-10） |
| 1427 | 医療法人社団上石神井サン・クリニック       | 177-0044 | 東京都練馬区上石神井3-6-34    | 03-5910-3888 | <a href="https://www.kamishakujii-sun-clinic.com/">https://www.kamishakujii-sun-clinic.com/</a>           |                    | ○                  | 内科        | 小西 正樹          |                                                     |
| 1428 | 医療法人社団弘順会大井<br>手クリニック    | 178-0063 | 東京都練馬区東大泉5-34-10    | 03-5905-2625 | <a href="http://www.oide-clinic.com/">http://www.oide-clinic.com/</a>                                     |                    | ○                  | 内科<br>小児科 | 大井手弘純          | 順天堂練馬病院（東京都練馬区高野台3-1-10）                            |
| 1429 | 医療法人社団晃仁会内田<br>内科胃腸クリニック | 176-0012 | 東京都練馬区豊玉北5-7-15     | 03-5912-1241 | <a href="https://uchida-cl.jp/">https://uchida-cl.jp/</a>                                                 |                    | ○                  | 内科        | 内田康仁           |                                                     |
| 1430 | 医療法人社団光葉会 佐<br>川クリニック    | 179-0083 | 東京都練馬区平和台2-11-14    | 03-6915-7233 | <a href="https://www.sagawaclinic.com/houmon">https://www.sagawaclinic.com/houmon</a>                     | ○                  | ○                  | 内科        | 佐川 直彦<br>佐川 絵理 |                                                     |
| 1431 | 医療法人社団浩陽会 はや<br>み医院      | 178-0061 | 東京都練馬区大泉学園町5-7-21   | 03-3922-3956 |                                                                                                           | ○                  | ○                  | 内科<br>小児科 | 早水 順子          |                                                     |

電話や情報通信機器を用いて診療を実施する医療機関の一覧（東京都）

|      | 基本情報                   |          |                          |              |                                                                                         | 事務連絡に基づく対応について     |                    |                   |       |                                              |
|------|------------------------|----------|--------------------------|--------------|-----------------------------------------------------------------------------------------|--------------------|--------------------|-------------------|-------|----------------------------------------------|
|      | 施設名                    | 郵便番号     | 住所（都道府県から記載）             | 電話番号         | ウェブサイトURL                                                                               | 初診の電話等を用いた診療の実施の有無 | 再診の電話等を用いた診療の実施の有無 | 対応診療科             | 担当医師名 | 対面診療が必要と判断した場合に連携する医療機関名（複数ある場合は複数、住所も併せて記載） |
| 1432 | 医療法人社団弘和会歌橋医院          | 176-0021 | 東京都練馬区貫井4-25-31          | 03-3999-6767 | <a href="http://www.utahashi-clinic.com/">http://www.utahashi-clinic.com/</a>           | ○                  | ○                  | 内科<br>小児科         | 歌橋和哉  | 順天堂練馬病院（東京都練馬区高野台3-1-10）                     |
| 1433 | 医療法人社団康和会田中医院          | 177-0032 | 東京都練馬区谷原6-9-8            | 03-3996-5700 | <a href="http://www.tanakaiin.net">http://www.tanakaiin.net</a>                         | ○                  | ○                  | 内科<br>小児科         | 田中 康之 |                                              |
| 1434 | 医療法人社団咲良会さくまクリニック      | 179-0072 | 東京都練馬区光が丘3-9-2 IMA南館2F   | 03-6904-2656 | <a href="https://sakuma-cl.jp/">https://sakuma-cl.jp/</a>                               |                    | ○                  | 泌尿器科<br>皮膚科       | 咲間 隆裕 |                                              |
| 1435 | 医療法人社団三世会 ねぎしクリニック     | 176-0012 | 東京都練馬区豊玉北4-19-6          | 03-3991-0328 | <a href="http://negishiclinic.com">http://negishiclinic.com</a>                         |                    | ○                  | 内科<br>小児科         | 佐藤 秀一 |                                              |
| 1436 | 医療法人三芽会原田クリニック         | 177-0041 | 東京都練馬区石神井町4-1-14繁田ビル2階東号 | 03-6766-3022 | <a href="http://www.haradaclinic.com">http://www.haradaclinic.com</a>                   | ○                  | ○                  | 内科消化器内科           | 原田 昇  |                                              |
| 1437 | 医療法人社団順洋会 武蔵野総合クリニック練馬 | 176-0001 | 東京都練馬区練馬1-26-1           | 03-3993-7015 | <a href="http://www.6340-group.jp/clinic-n/">http://www.6340-group.jp/clinic-n/</a>     | ○                  | ○                  | 総合診療科             | 小林医師  |                                              |
| 1438 | 医療法人社団祥和会 中村内科クリニック    | 179-0071 | 東京都練馬区旭町2-9-13           | 03-3977-3673 | <a href="https://www.nakamura-naikaclinic.jp/">https://www.nakamura-naikaclinic.jp/</a> | ○                  | ○                  | 内科                | 出口 祥子 |                                              |
| 1439 | 医療法人社団清栄会加藤医院          | 179-0076 | 東京都練馬区土支田1-6-6           | 03-3922-5861 | <a href="http://www.katou-iin.jp">http://www.katou-iin.jp</a>                           | ○                  | ○                  | 内科<br>小児科<br>呼吸器科 | 加藤 博一 |                                              |
| 1440 | 医療法人社団世仁会すすき耳鼻咽喉科      | 176-0021 | 東京都練馬区貫井3-8-4            | 03-3577-9560 | <a href="http://suzuki-ent.jp">http://suzuki-ent.jp</a>                                 | ○                  | ○                  | 耳鼻科               | 鈴木伸弘  |                                              |



電話や情報通信機器を用いて診療を実施する医療機関の一覧（東京都）

|      | 基本情報                     |          |                              |              |                                                                                           | 事務連絡に基づく対応について     |                    |                         |                          |                                              |
|------|--------------------------|----------|------------------------------|--------------|-------------------------------------------------------------------------------------------|--------------------|--------------------|-------------------------|--------------------------|----------------------------------------------|
|      | 施設名                      | 郵便番号     | 住所（都道府県から記載）                 | 電話番号         | ウェブサイトURL                                                                                 | 初診の電話等を用いた診療の実施の有無 | 再診の電話等を用いた診療の実施の有無 | 対応診療科                   | 担当医師名                    | 対面診療が必要と判断した場合に連携する医療機関名（複数ある場合は複数、住所も併せて記載） |
| 1441 | 医療法人社団ゾーフハルマ中村医院         | 177-0032 | 東京都練馬区谷原2-11-5               | 03-3997-0250 |                                                                                           | ○                  | ○                  | 内科                      | 中村 光彦                    | 坪田和光病院（埼玉県和光市白子2-12-15）                      |
| 1442 | 医療法人社団 徳枝会 佐藤小児科皮膚科クリニック | 177-0051 | 東京都練馬区関町北1-22-10-201         | 03-3928-2767 | <a href="http://www.hifu-codomo.com">http://www.hifu-codomo.com</a>                       |                    | ○                  | 小児科<br>皮膚科              | 佐藤 徳枝<br>海老原亜貴子<br>倉繁公美子 | 順天堂練馬病院等                                     |
| 1443 | 医療法人社団中山クリニック            | 179-0073 | 東京都練馬区田柄2-45-8               | 03-3939-0361 | <a href="https://nakayama-nerima.clinic/">https://nakayama-nerima.clinic/</a>             | ○                  | ○                  | 内科・消化器内科・外科             | 中山 昇                     |                                              |
| 1444 | 医療法人社団柔和会 藤澤こどもクリニック     | 176-0012 | 東京都練馬区豊玉北6-6-6               | 03-3557-7950 | <a href="http://fujisawa-kodomo.com">http://fujisawa-kodomo.com</a>                       | ○                  | ○                  | 小児科 内科<br>アレルギー科<br>皮膚科 | 藤澤 孝人<br>浦邊 智美           |                                              |
| 1445 | 医療法人社団のと小児科クリニック         | 179-0083 | 東京都練馬区平和台4-12-6              | 03-5945-9855 | <a href="https://www.noto-clinic.com/heiwadai/">https://www.noto-clinic.com/heiwadai/</a> | ○                  | ○                  | 内科、小児科                  | 能登 信孝<br>藤田 ひろ子          | 日大板橋病院（東京都板橋区大谷口上町30-1）                      |
| 1446 | 医療法人社団平真会 薬師堂診療所         | 177-0035 | 東京都練馬区南田中3-26-3              | 03-3997-2657 | <a href="http://www.yakushido.jp/">http://www.yakushido.jp/</a>                           | ○                  | ○                  | 内科                      | 平良 眞一郎                   |                                              |
| 1447 | 医療法人社団平成会たいら整形外科クリニック    | 179-0076 | 東京都練馬区土支田2-29-19             | 03-5947-3699 | <a href="https://taira-seikeigeka.jp/">https://taira-seikeigeka.jp/</a>                   | ○                  | ○                  | 整形外科                    | 平良 勝成                    |                                              |
| 1448 | 医療法人社団倫佑会 富士見台眼科         | 176-0021 | 東京都練馬区貫井3-11-14 1F           | 03-5987-5311 |                                                                                           |                    | ○                  | 眼科                      | 浅野 由香                    |                                              |
| 1449 | 医療法人社団和泰会 平和台クリニック       | 179-0083 | 東京都練馬区平和台4-26-8ザ・グランディール平和台I | 03-5922-1241 | <a href="http://www.d-disk.net/heiwadai/">http://www.d-disk.net/heiwadai/</a>             | ○                  | ○                  | 内科                      | 千葉井基泰                    | 安田病院（東京都板橋区成増1-13-9）                         |

電話や情報通信機器を用いて診療を実施する医療機関の一覧（東京都）

|      | 基本情報             |          |                              |              |                                                                           | 事務連絡に基づく対応について     |                    |                         |                 |                                                   |
|------|------------------|----------|------------------------------|--------------|---------------------------------------------------------------------------|--------------------|--------------------|-------------------------|-----------------|---------------------------------------------------|
|      | 施設名              | 郵便番号     | 住所（都道府県から記載）                 | 電話番号         | ウェブサイトURL                                                                 | 初診の電話等を用いた診療の実施の有無 | 再診の電話等を用いた診療の実施の有無 | 対応診療科                   | 担当医師名           | 対面診療が必要と判断した場合に連携する医療機関名（複数ある場合は複数、住所も併せて記載）      |
| 1450 | 上原医院             | 179-0081 | 東京都練馬区北町8丁目12-10             | 03-3935-2226 |                                                                           | ○                  | ○                  | 内科、小児科                  | 上原 毅            |                                                   |
| 1451 | 江古田みずのクリニック      | 176-0006 | 東京都練馬区栄町32-13スワースモアN1F       | 03-6914-6475 | <a href="https://www.mizuno-cl.net">https://www.mizuno-cl.net</a>         |                    | ○                  | 精神科、心療内科                | 水野智之            |                                                   |
| 1452 | 大泉アカデミアクリニック     | 178-0063 | 東京都練馬区東大泉1-30-4第7三幸ビル3F      | 03-5933-2522 | <a href="http://www.med-academia.com">www.med-academia.com</a>            |                    | ○                  | 内科 外科                   | 脇田 進一           |                                                   |
| 1453 | 大泉学園子ども・思春期クリニック | 178-0063 | 東京都練馬区東大泉6-47-18ドクターズポート大泉学園 | 03-5935-7861 | <a href="http://oizumi-kodomo.com/">oizumi-kodomo.com/</a>                |                    | ○                  | 小児科                     | 齋藤 正博           |                                                   |
| 1454 | 大泉学園桜クリニック       | 178-0061 | 東京都練馬区大泉学園町7-24-15           | 03-5933-1075 |                                                                           | ○                  | ○                  | 内科<br>外科                | 北島 圭浩           |                                                   |
| 1455 | 大泉生協病院           | 178-0063 | 東京都練馬区東大泉6-3-3               | 03-5387-3111 | <a href="http://www.ooizumi.net">http://www.ooizumi.net</a>               |                    | ○                  | 内科                      | 各科かかりつけ医        |                                                   |
| 1456 | 大泉中央クリニック        | 178-0061 | 東京都練馬区大泉学園町6-27-2            | 03-3923-5678 | <a href="https://www.oizumi-clinic.com">https://www.oizumi-clinic.com</a> | ○                  | ○                  | 内科<br>外科                | 砂村 眞琴           | 国立埼玉病院（埼玉県和光市諏訪2-1）<br>順天堂大学練馬病院（東京都練馬区高野台3-1-10） |
| 1457 | おおぐち子どもクリニック     | 1790074  | 東京都練馬区春日町5-33-30-1F          | 359719009    | <a href="https://www.kodomoclinic.info">https://www.kodomoclinic.info</a> | ○                  | ○                  | 小児科                     | 大口展生            | 自院で可能ですが、入院が必要そうなら順天堂練馬病院に紹介します。                  |
| 1458 | 大角医院             | 177-0044 | 東京都練馬区上石神井4-3-23             | 03-3920-0966 | <a href="https://oosumi-cl.net/">https://oosumi-cl.net/</a>               | ○                  | ○                  | 内科・外科・<br>小児科・泌尿器科・呼吸器科 | 中島・伊藤・<br>毛利・紀伊 |                                                   |

電話や情報通信機器を用いて診療を実施する医療機関の一覧（東京都）

|      | 基本情報              |          |                             |              |                                                                                   | 事務連絡に基づく対応について     |                    |                      |               |                                                       |
|------|-------------------|----------|-----------------------------|--------------|-----------------------------------------------------------------------------------|--------------------|--------------------|----------------------|---------------|-------------------------------------------------------|
|      | 施設名               | 郵便番号     | 住所（都道府県から記載）                | 電話番号         | ウェブサイトURL                                                                         | 初診の電話等を用いた診療の実施の有無 | 再診の電話等を用いた診療の実施の有無 | 対応診療科                | 担当医師名         | 対面診療が必要と判断した場合に連携する医療機関名（複数ある場合は複数、住所も併せて記載）          |
| 1459 | 大野医院              | 176-0005 | 東京都練馬区旭丘1-55-5              | 03-3951-8182 | <a href="http://ohno-cli.com/">http://ohno-cli.com/</a>                           | ○                  | ○                  | 内科<br>小児科            | 大野大二          |                                                       |
| 1460 | おなかの富士見台クリニック     | 176-0021 | 東京都練馬区貫井3-3-10富士屋ビル3階       | 03-5971-2421 | <a href="http://www.onaka-fujimidai.com/">http://www.onaka-fujimidai.com/</a>     |                    | ○                  | 内科<br>肛門科            | 服部 正一         | 河北総合病院（東京都杉並区阿佐谷北1-7-3）                               |
| 1461 | かくたに内視鏡消化器内科クリニック | 176-0041 | 東京都練馬区石神井町3-21-9第三島光ビル3階    | 03-3997-7149 | <a href="https://www.nerima-naisikyoo.com/">https://www.nerima-naisikyoo.com/</a> | ○                  | ○                  | 内視鏡内科<br>消化器内科<br>内科 | 角谷 宏          | 東京慈恵会医科大学（東京都港区新橋3-19-18）<br>練馬光が丘病院（東京都練馬区光が丘2-11-1） |
| 1462 | 笠井内科循環器クリニック      | 176-0021 | 東京都練馬区貫井3-11-12ジョイントヒルズ3F   | 03-3577-8071 | <a href="http://www.kasai-naika.com">http://www.kasai-naika.com</a>               | ○                  | ○                  | 内科<br>循環器内科          | 笠井 建彰         |                                                       |
| 1463 | 加藤クリニック           | 177-0051 | 東京都練馬区関町北2-27-11-5F         | 03-3920-3920 | <a href="http://www2.gol.com/users/katoc/">www2.gol.com/users/katoc/</a>          |                    | ○                  | 内科                   | 加藤久良          | 東京医科歯科大学医学部付属病院（東京都文京区湯島1-5-45）                       |
| 1464 | 金田医院              | 177-0045 | 東京都練馬区石神井台7-2-10            | 03-3920-1065 | <a href="http://kanedaiinn.com">http://kanedaiinn.com</a>                         |                    | ○                  | 内科消化器内科              | 金田伸章          |                                                       |
| 1465 | かわはらメンタルクリニック     | 179-0075 | 東京都練馬区高松5-18-4 サワラワ-大門光が丘1F | 03-6913-1523 | <a href="https://kawahara-cl.byoinnavi.jp/">https://kawahara-cl.byoinnavi.jp/</a> |                    | ○                  | 精神科<br>心療内科          | 河原 聖之         | 当院（病状に応じ、対面診察・来院を依頼することあり）                            |
| 1466 | くどうクローバークリニック     | 177-0051 | 東京都練馬区関町北2丁目26-17           | 03-5903-5070 | <a href="https://www.kudocloverclinic.jp/">https://www.kudocloverclinic.jp/</a>   | ○                  | ○                  | 内科                   | 工藤學           | 順天堂練馬病院（東京都練馬区高野台3-1-10）                              |
| 1467 | こくぶん医院            | 179-0081 | 東京都練馬区北町1-36-18             | 03-3933-5550 |                                                                                   |                    | ○                  | 内科小児科                | 國分裕司<br>國分百合子 |                                                       |

電話や情報通信機器を用いて診療を実施する医療機関の一覧（東京都）

|      | 基本情報            |          |                                   |              |                                                                                                       | 事務連絡に基づく対応について     |                    |                                                                                              |                  |                                                                                  |
|------|-----------------|----------|-----------------------------------|--------------|-------------------------------------------------------------------------------------------------------|--------------------|--------------------|----------------------------------------------------------------------------------------------|------------------|----------------------------------------------------------------------------------|
|      | 施設名             | 郵便番号     | 住所（都道府県から記載）                      | 電話番号         | ウェブサイトURL                                                                                             | 初診の電話等を用いた診療の実施の有無 | 再診の電話等を用いた診療の実施の有無 | 対応診療科                                                                                        | 担当医師名            | 対面診療が必要と判断した場合に連携する医療機関名（複数ある場合は複数、住所も併せて記載）                                     |
| 1468 | 権藤醫院            | 178-0063 | 東京都練馬区東大泉1-27-25                  | 03-3923-5515 |                                                                                                       | ○                  | ○                  | 内科                                                                                           | 権藤守男             | 国立東京病院(東京都清瀬市竹丘3-1-1)<br>国立埼玉病院(埼玉県和光市諏訪2-1)                                     |
| 1469 | 桜台診療所           | 1760002  | 東京都練馬区桜台1-7-5                     | 03-3993-0305 | <a href="http://www.myclinic.ne.jp">http://www.myclinic.ne.jp</a>                                     |                    | ○                  | 精神科<br>心療内科                                                                                  | 辰野剛              |                                                                                  |
| 1470 | さとう内科医院         | 177-0045 | 東京都練馬区石神井台4-7-3石神井台クリニック<br>モール1階 | 03-5903-9613 | <a href="http://satoh-naikaiin.jp/">http://satoh-naikaiin.jp/</a>                                     | ○                  | ○                  | 内科・循環器内科                                                                                     | 佐藤 元             | 順天堂練馬病院（東京都練馬区高野台3-1-10）荻窪病院<br>（東京都杉並区今川3-1-24）                                 |
| 1471 | 慈雲堂病院           | 177-0053 | 東京都練馬区関町南四丁目14番5号                 | 03-3928-6511 | <a href="http://www.jiundo.or.jp">http://www.jiundo.or.jp</a>                                         |                    | ○                  | 内科<br>精神科                                                                                    | 有賀正恵<br>田邊英一ほか多数 |                                                                                  |
| 1472 | しまむらファミリークリニック  | 179-0074 | 東京都練馬区春日町3-29-8 2F                | 03-5848-6477 | <a href="https://shimamura-fc.com/">https://shimamura-fc.com/</a>                                     |                    | ○                  | 内科                                                                                           | 島村 元章            |                                                                                  |
| 1473 | 下島メディカルクリニック    | 170-0081 | 東京都練馬区北町2-36-6ソレム守屋1F             | 03-5945-3266 | <a href="http://www.shimajima-clinic.com">http://www.shimajima-clinic.com</a>                         | ○                  | ○                  | 内科 小児科                                                                                       | 下島ひろみ            |                                                                                  |
| 1474 | 順天堂大学医学部附属練馬病院  | 177-8521 | 東京都練馬区高野台3-1-10                   | 03-5923-3111 | <a href="https://www.juntendo.ac.jp/hospital/nerima/">https://www.juntendo.ac.jp/hospital/nerima/</a> |                    | ○                  | 総合診療・性差科<br>(外来)<br>総合診療・性差科<br>循環器内科<br>消化器内科<br>呼吸器内科<br>腎・高血圧内科<br>膠原病・リウマチ<br>内科<br>血液内科 | 各医師              |                                                                                  |
| 1475 | 新桜台 内科・外科クリニック  | 176-0002 | 東京都練馬区桜台1-28-8 シースリーモール新桜台2階      | 03-3993-9090 | <a href="https://sakuradai-clinic.jp/">https://sakuradai-clinic.jp/</a>                               |                    | ○                  | 内科<br>外科                                                                                     | 橋本 大樹            | 練馬総合病院（東京都練馬区旭丘1-24-1）<br>順天堂大学練馬病院（東京都練馬区高野台3-1-10）<br>日大板橋病院（東京都板橋区大谷口上町30番1号） |
| 1476 | 新桜台中村ファミリークリニック | 176-0003 | 東京都練馬区羽沢2-2-14                    | 03-3991-7131 | <a href="http://www.s-nfc.com">http://www.s-nfc.com</a>                                               |                    | ○                  | 内科<br>小児科<br>皮膚科                                                                             | 中村 聡美            |                                                                                  |

電話や情報通信機器を用いて診療を実施する医療機関の一覧（東京都）

|      | 基本情報          |          |                             |              |                                                                                 | 事務連絡に基づく対応について     |                    |               |                |                                              |
|------|---------------|----------|-----------------------------|--------------|---------------------------------------------------------------------------------|--------------------|--------------------|---------------|----------------|----------------------------------------------|
|      | 施設名           | 郵便番号     | 住所（都道府県から記載）                | 電話番号         | ウェブサイトURL                                                                       | 初診の電話等を用いた診療の実施の有無 | 再診の電話等を用いた診療の実施の有無 | 対応診療科         | 担当医師名          | 対面診療が必要と判断した場合に連携する医療機関名（複数ある場合は複数、住所も併せて記載） |
| 1477 | すみ医院          | 176-0021 | 東京都練馬区貫井1-5-9               | 03-3999-7321 |                                                                                 |                    | ○                  | 精神科           | 鷺見 すみ江         |                                              |
| 1478 | すみれホームケアクリニック | 177-0031 | 東京都練馬区三原台3-26-14 ポレール石神井403 | 03-6904-5828 | <a href="https://sumire-clinic.jp">https://sumire-clinic.jp</a>                 | ○                  | ○                  | 内科            | 市場 保           | 大泉生協病院（東京都練馬区東大泉6-3-3）                       |
| 1479 | 関町子どもクリニック    | 168-0072 | 東京都練馬区関町北5-15-26 2F         | 03-5991-0888 | <a href="http://sekimachi-kodomo.com/">http://sekimachi-kodomo.com/</a>         | ○                  | ○                  | 小児科<br>アレルギー科 | 伊藤 真樹          |                                              |
| 1480 | 関町内科クリニック     | 177-0051 | 東京都練馬区関町北5-6-1              | 03-5903-3881 |                                                                                 | ○                  | ○                  | 内科<br>小児科     | 申 偉秀           | 国立国際医療研究センター<br>豊島病院                         |
| 1481 | 妹尾眼科医院        | 178-0063 | 東京都練馬区東大泉5-36-6             | 03-3922-5341 |                                                                                 | ○                  | ○                  | 眼科            | 妹尾一恵           |                                              |
| 1482 | 竹下医院          | 178-0064 | 東京都練馬区南大泉5-36-9             | 03-3922-3341 | <a href="https://www.takeshita-clinic.jp/">https://www.takeshita-clinic.jp/</a> |                    | ○                  | 内科・外科         | 安藤 由美子         |                                              |
| 1483 | 築根クリニック       | 177-0052 | 東京都練馬区関町東1-22-11            | 03-3928-7868 |                                                                                 |                    | ○                  | 内科            | 築根 吉彦<br>石橋みゆき |                                              |
| 1484 | つかさクリニック      | 178-0063 | 東京都練馬区東大泉1-28-6モンセーヌ大泉3階    | 03-5947-5800 | <a href="http://www.tsukasa-c.com">http://www.tsukasa-c.com</a>                 | ○                  | ○                  | 内科<br>小児科     | 下田 司           |                                              |
| 1485 | つちやハートクリニック   | 176-0024 | 東京都練馬区中村3-17-6内田ビル1F        | 03-5933-9914 | <a href="http://t-heartclinic.com">http://t-heartclinic.com</a>                 |                    | ○                  | 内科<br>循環器内科   | 土屋 洋人          | 順天堂大学医学部附属練馬病院（〒177-8521 東京都練馬区高野台3-1-10）    |

電話や情報通信機器を用いて診療を実施する医療機関の一覧（東京都）

|      | 基本情報             |          |                                |              |                                 | 事務連絡に基づく対応について     |                    |                 |               |                                                    |
|------|------------------|----------|--------------------------------|--------------|---------------------------------|--------------------|--------------------|-----------------|---------------|----------------------------------------------------|
|      | 施設名              | 郵便番号     | 住所（都道府県から記載）                   | 電話番号         | ウェブサイトURL                       | 初診の電話等を用いた診療の実施の有無 | 再診の電話等を用いた診療の実施の有無 | 対応診療科           | 担当医師名         | 対面診療が必要と判断した場合に連携する医療機関名（複数ある場合は複数、住所も併せて記載）       |
| 1486 | とうみょう内科クリニック     | 177-0035 | 東京都練馬区南田中1-13-13プレミールコート1F     | 03-5923-6262 | http://www.tomyo-clinic.jp      | ○                  | ○                  | 内科<br>リウマチ科     | 東名 正幸         |                                                    |
| 1487 | 富田いきいきクリニック      | 177-0051 | 東京都練馬区関町北4-4-17                | 03-3928-2781 | http://www.tomida-ikiiki.com    | ○                  | ○                  | 内科、外科、脳<br>神経外科 | 富田 修一先生       |                                                    |
| 1488 | 内科 吉沢医院          | 179-0071 | 東京都練馬区旭町3-25-21-1F             | 03-6423-0707 | http://naika-yoshizawaiin.jp/   | ○                  | ○                  | 内科              | 吉澤亜人          |                                                    |
| 1489 | 中村内科クリニック        | 178-0061 | 東京都練馬区大泉学園町4-22-13             | 03-3867-1711 |                                 |                    | ○                  | 内科 小児科<br>循環器科  | 中村 尚己         |                                                    |
| 1490 | 中村橋駅前内科クリニック     | 176-0023 | 東京都練馬区中村北3-23-5<br>シュウカワグチビル1階 | 03-5848-7830 | https://nakamurabashi-naika.com | ○                  | ○                  | 内科              | 篠原 明成         |                                                    |
| 1491 | 沼口整形外科・小児科       | 179-0072 | 東京都練馬区光が丘5-2-5-102             | 03-3976-0131 | http://numaguchi.clinic/        | ○                  | ○                  | 小児科             | 沼口俊介<br>沼口俊平  |                                                    |
| 1492 | ねりま駅前キッズクリニック    | 176-0001 | 東京都練馬区練馬1-17-1 4F              | 03-6914-8821 | https://nerima-kids.com/        | ○                  | ○                  | 小児科             | 成高中之<br>徳竹忠臣  | 順天堂大学附属練馬病院（練馬区高野台3-1-10）<br>練馬光が丘病院（練馬区光が丘2-11-1） |
| 1493 | 練馬駅前 内視鏡・乳腺クリニック | 176-0001 | 東京都練馬区練馬1-4-1 ユニティフォーラム9階      | 03-5912-1230 | http://www.nbec.jp              |                    | ○                  | 乳腺外科 内科         | 佐貫潤一 佐貫<br>千秋 |                                                    |
| 1494 | 練馬総合病院           | 176-8530 | 東京都練馬区旭丘 1-2-4-1               | 03-5988-2200 | https://nerima-hosp.or.jp/      |                    | ○                  | 全科              | 各医師           |                                                    |

電話や情報通信機器を用いて診療を実施する医療機関の一覧（東京都）

|      | 基本情報          |          |                          |              |                                                                                                   | 事務連絡に基づく対応について     |                    |                           |                          |                                              |
|------|---------------|----------|--------------------------|--------------|---------------------------------------------------------------------------------------------------|--------------------|--------------------|---------------------------|--------------------------|----------------------------------------------|
|      | 施設名           | 郵便番号     | 住所（都道府県から記載）             | 電話番号         | ウェブサイトURL                                                                                         | 初診の電話等を用いた診療の実施の有無 | 再診の電話等を用いた診療の実施の有無 | 対応診療科                     | 担当医師名                    | 対面診療が必要と判断した場合に連携する医療機関名（複数ある場合は複数、住所も併せて記載） |
| 1495 | 練馬第二診療所       | 176-0001 | 東京都練馬区練馬1-6-16           | 03-3991-4670 | <a href="http://www.kenbun.or.jp/">http://www.kenbun.or.jp/</a>                                   |                    | ○                  | 内科                        | 奈倉 志のぶ                   |                                              |
| 1496 | 野口医院          | 176-0001 | 東京都練馬区豊玉上1-13-6          | 03-3994-5018 | <a href="http://www.shinseikai-cc.jp">http://www.shinseikai-cc.jp</a>                             | ○                  | ○                  | 内科                        | 野口 眞利                    |                                              |
| 1497 | 野崎クリニック       | 177-0054 | 東京都練馬区立野町14-15           | 03-3920-4066 |                                                                                                   | ○                  | ○                  | 内科                        | 野崎 基                     |                                              |
| 1498 | 氷川台のと小児科クリニック | 179-0084 | 東京都練馬区氷川台3-40-6 1階3階     | 03-5946-9950 | <a href="https://www.noto-clinic.com/hikawadai/">https://www.noto-clinic.com/hikawadai/</a>       |                    | ○                  | 小児科                       | 能登 孝昇                    |                                              |
| 1499 | 富士見堂クリニック     | 176-0021 | 東京都練馬区貫井3-14-6           | 03-5848-5987 | <a href="http://www.fujimido-clinic.com">http://www.fujimido-clinic.com</a>                       | ○                  | ○                  | 内科                        | 榎本信行                     |                                              |
| 1500 | 二葉医院          | 177-0031 | 東京都練馬区三原台1-1-17          | 03-3922-1466 | <a href="http://www.futaba-iin.com">http://www.futaba-iin.com</a>                                 |                    | ○                  | 内科<br>小児科                 | 野上 眞                     |                                              |
| 1501 | 間遠医院          | 179-0073 | 東京都練馬区田柄4-27-23          | 03-3975-1550 | <a href="https://sites.google.com/site/madoclinic/">https://sites.google.com/site/madoclinic/</a> | ○                  | ○                  | 内科<br>消化器科<br>循環器科<br>肛門科 | 間遠 一成<br>須郷 亜紀子<br>間遠 陽子 |                                              |
| 1502 | 丸山整形外科        | 178-0063 | 東京都練馬区東大泉4-27-40-2F      | 03-3978-8555 | <a href="http://www.maruyama-seikei.jp/">http://www.maruyama-seikei.jp/</a>                       | ○                  | ○                  | 整形外科                      | 丸山徹雄                     | 順天堂大学付属練馬病院                                  |
| 1503 | 水谷内科呼吸器科クリニック | 178-0063 | 東京都練馬区東大泉6-51-4TKマンション1階 | 03-3867-8141 | <a href="http://www.mizutani-clinic.com">www.mizutani-clinic.com</a>                              | ○                  | ○                  | 内科                        | 水谷清二                     |                                              |

電話や情報通信機器を用いて診療を実施する医療機関の一覧（東京都）

|      | 基本情報                    |          |                               |              |                                                                                       | 事務連絡に基づく対応について     |                    |                   |                        |                                                      |
|------|-------------------------|----------|-------------------------------|--------------|---------------------------------------------------------------------------------------|--------------------|--------------------|-------------------|------------------------|------------------------------------------------------|
|      | 施設名                     | 郵便番号     | 住所（都道府県から記載）                  | 電話番号         | ウェブサイトURL                                                                             | 初診の電話等を用いた診療の実施の有無 | 再診の電話等を用いた診療の実施の有無 | 対応診療科             | 担当医師名                  | 対面診療が必要と判断した場合に連携する医療機関名（複数ある場合は複数、住所も併せて記載）         |
| 1504 | 宮園内科クリニック               | 179-0075 | 東京都練馬区高松1-4-2-20              | 03-3825-1001 | <a href="http://www.miyazono-clinic.or.jp">http://www.miyazono-clinic.or.jp</a>       |                    | ○                  | 内科                | 宮園 裕子                  | 練馬光が丘病院（東京都練馬区光が丘2-11-1）<br>順天堂練馬病院（東京都練馬区高野台3-1-10） |
| 1505 | 宮本外科内科                  | 179-0082 | 東京都練馬区錦2-8-5                  | 03-3933-5656 |                                                                                       | ○                  | ○                  | 内科                | 宮本 成基                  | 豊島病院（東京都豊島区）                                         |
| 1506 | 山川クリニック                 | 178-0063 | 東京都練馬区東大泉7-3-8-5              | 03-3867-1885 | <a href="https://yamakawa-clinic.biz">https://yamakawa-clinic.biz</a>                 | ○                  | ○                  | 内・外科・脳外・神経内科・整形外科 | 山川健太                   |                                                      |
| 1507 | わだファミリークリニック            | 177-0035 | 東京都練馬区南田中3-7-29               | 03-6915-9156 | <a href="http://www.wada-family-clinic.jp/">http://www.wada-family-clinic.jp/</a>     |                    | ○                  | 神経内科 内科<br>小児科    | 和田 圭一郎<br>和田 万里子       |                                                      |
| 1508 | 医療法人社団こいし会 関町ゆいクリニック    | 177-0051 | 東京都練馬区関町北2-26-11              | 03-6766-0808 | <a href="https://www.sekimachiyuclinic.com/">https://www.sekimachiyuclinic.com/</a>   | ○                  | ○                  | 内科                | 吉田 聡                   |                                                      |
| 1509 | 医療法人社団ナイズ キャップスクリニック光が丘 | 179-0072 | 東京都練馬区光が丘2丁目10番2号 光が丘IMA東館 2階 | 03-6904-0330 | <a href="https://caps-clinic.jp/hikarigaoka/">https://caps-clinic.jp/hikarigaoka/</a> | ○                  | ○                  | 小児科               | 吉田 聡                   |                                                      |
| 1510 | テル皮膚科                   | 176-0023 | 東京都練馬区中村北1-10-12              | 03-3577-5100 | <a href="https://teru-hifuka.com/">https://teru-hifuka.com/</a>                       | ○                  | ○                  | 皮膚科               | 東芝 輝臣                  |                                                      |
| 1511 | 医療法人社団育陽会 練馬さくら病院       | 179-0081 | 東京都練馬区北町3-7-19                | 03-3931-1101 | <a href="http://www.t-sakurahosp.com/">http://www.t-sakurahosp.com/</a>               |                    | ○                  | 内科<br>精神科         | 三橋 将人<br>高野 徹<br>在宅担当医 |                                                      |
| 1512 | 旭医院                     | 120-0026 | 東京都足立区旭町9-15                  | 03-3888-3508 | <a href="http://www.asahi-i.in.jp/">http://www.asahi-i.in.jp/</a>                     | ○                  | ○                  | 内科・胃腸内科・外科        | 青木 哲                   |                                                      |



電話や情報通信機器を用いて診療を実施する医療機関の一覧（東京都）

|      | 基本情報                     |          |                              |              |                                                                               | 事務連絡に基づく対応について     |                    |                                             |                                                   |                                                                                                          |
|------|--------------------------|----------|------------------------------|--------------|-------------------------------------------------------------------------------|--------------------|--------------------|---------------------------------------------|---------------------------------------------------|----------------------------------------------------------------------------------------------------------|
|      | 施設名                      | 郵便番号     | 住所（都道府県から記載）                 | 電話番号         | ウェブサイトURL                                                                     | 初診の電話等を用いた診療の実施の有無 | 再診の電話等を用いた診療の実施の有無 | 対応診療科                                       | 担当医師名                                             | 対面診療が必要と判断した場合に連携する医療機関名（複数ある場合は複数、住所も併せて記載）                                                             |
| 1513 | あだち共生病院                  | 120-0855 | 東京都足立区本木南町27-6               | 03-3880-2777 |                                                                               |                    | ○                  | 内科                                          | 梶原・井關                                             |                                                                                                          |
| 1514 | 足立慶友眼科                   | 120-0015 | 東京都足立区足立1-12-12足立メディカルモール2F  | 03-5845-8200 | <a href="https://keiyu-ganka.com/">https://keiyu-ganka.com/</a>               | ○                  | ○                  | 眼科                                          | 清水 努                                              |                                                                                                          |
| 1515 | 足立慶友整形外科                 | 120-0015 | 東京都足立区足立1-12-12 足立メディカルモール3F | 03-5845-8900 | <a href="https://clinic.adachikeiyu.com/">https://clinic.adachikeiyu.com/</a> |                    | ○                  | 整形外科<br>リウマチ科                               | 北城 雅照                                             |                                                                                                          |
| 1516 | 井上てるクリニック                | 121-0813 | 東京都足立区竹ノ塚5-7-10森屋ビル2F        | 03-5851-7666 | <a href="https://inoueteru.jp/">https://inoueteru.jp/</a>                     | ○                  | ○                  |                                             |                                                   |                                                                                                          |
| 1517 | 医療法人社団 綾瀬病院              | 120-0005 | 東京都足立区綾瀬6丁目3番1号              | 03-3605-3319 | <a href="http://ayasehp.la.coocan.jp/">http://ayasehp.la.coocan.jp/</a>       |                    | ○                  | 内科・精神科                                      | 担当医師                                              |                                                                                                          |
| 1518 | 医療法人社団観美会 えのもとファミリークリニック | 120-0038 | 東京都足立区千住橋戸町1-13 ポンテポルタ千住4F   | 03-6806-2471 | <a href="https://enomoto-fcl.jp/">https://enomoto-fcl.jp/</a>                 | ○                  | ○                  | 内科<br>小児科                                   | 榎本あき矢                                             | 東京女子医科大学東医療センター<br>（東京都荒川区西尾久2-1-10）<br>東京慈恵会医科大学葛飾医療センター<br>（東京都葛飾区青戸6-41-2）<br>東部地域病院（東京都葛飾区西亀有5-14-1） |
| 1519 | 医療法人社団三奉会井上クリニック         | 121-0813 | 東京都足立区竹の塚5丁目11番8号            | 03-3850-5771 | <a href="http://www.inouehsp.or.jp">http://www.inouehsp.or.jp</a>             |                    | ○                  | 内科                                          | 早川貴美子                                             |                                                                                                          |
| 1520 | 医療法人社団 俊和会 寺田病院          | 123-0873 | 東京都足立区扇1-20-12               | 03-3898-5231 | <a href="https://terada-hospital.or.jp/">https://terada-hospital.or.jp/</a>   |                    | ○                  | 内科、外科、胃腸内科、大腸・肛門外科、消化器内科（内視鏡）、整形外科、婦人科、泌尿器科 | 寺田俊明、澤井廣量、葛岡健太郎、堀孝史、田中良明、最上恭至、高石祐子、神山剛一、竹本俊二、中村浩他 |                                                                                                          |
| 1521 | 医療法人社団仁幸会 扇大橋病院          | 123-0873 | 東京都足立区扇1-55-28               | 03-3890-1171 | <a href="https://ougioohashi-hp.com/">https://ougioohashi-hp.com/</a>         |                    | ○                  | 内科                                          | 金光 裕仁                                             |                                                                                                          |

電話や情報通信機器を用いて診療を実施する医療機関の一覧（東京都）

|      | 基本情報                     |          |                         |              |                               | 事務連絡に基づく対応について     |                    |                |                                 |                                              |
|------|--------------------------|----------|-------------------------|--------------|-------------------------------|--------------------|--------------------|----------------|---------------------------------|----------------------------------------------|
|      | 施設名                      | 郵便番号     | 住所（都道府県から記載）            | 電話番号         | ウェブサイトURL                     | 初診の電話等を用いた診療の実施の有無 | 再診の電話等を用いた診療の実施の有無 | 対応診療科          | 担当医師名                           | 対面診療が必要と判断した場合に連携する医療機関名（複数ある場合は複数、住所も併せて記載） |
| 1522 | 医療法人社団心和会足立共済病院          | 120-0022 | 東京都足立区柳原1-36-8          | 03-3881-6116 | http://www.adachi-kyosai.com/ |                    | ○                  | 内科、外科          | 山本 学、水谷 央                       |                                              |
| 1523 | 医療法人社団中興会ミルデイス内科胃腸科クリニック | 120-0034 | 東京都足立区千住3-98千住ミルデイスII番館 | 03-3888-1871 | http://www.milledix.com       | ○                  | ○                  | 内科<br>消化器内科    | 中村治道<br>吉汲 祐加子                  |                                              |
| 1524 | 医療法人社団なづな会池上レディースクリニック   | 121-0823 | 東京都足立区伊興5-6-8           | 03-5838-0228 | http://www.ikegami-lady.com   |                    | ○                  | 婦人科            | 池上 芳美                           |                                              |
| 1525 | 医療法人社団 日岩会下井病院           | 120-0005 | 東京都足立区綾瀬3-28-8          | 03-3620-8811 | http://www.shimoi.or.jp/      | ○                  | ○                  | 整形外科<br>内科     | 金沢 輝久<br>下井 優一<br>下井 謙吾         |                                              |
| 1526 | 医療法人社団大和会平成扇病院           | 123-0873 | 東京都足立区扇3-26-5           | 03-3855-5500 | https://ougihp.jp/            |                    | ○                  | 精神科            | 日野 哲耶<br>山縣 文<br>松井 敏史<br>宮川 熱志 | 医療法人社団大和会 大内病院                               |
| 1527 | 医療法人社団六扇会西新井江北クリニック      | 123-0845 | 東京都足立区西新井本町2-27-13・1階   | 03-5838-0833 | https://rokusenkai.jp/        |                    | ○                  | 内科             | 前田 義智                           |                                              |
| 1528 | 大内病院                     | 123-0841 | 東京都足立区西新井5-41-1         | 03-3890-1306 | https://ouchihp.net/          |                    | ○                  | 精神科            | 各医師                             |                                              |
| 1529 | おおつぼ小児科                  | 123-0851 | 東京都足立区梅田6-31-11         | 03-3840-7773 | http://otsubo-peds.com        |                    | ○                  | 小児科<br>アレルギー科  | 大坪 主税                           |                                              |
| 1530 | おかのクリニック                 | 123-0841 | 東京都足立区西新井1-11-4         | 03-3898-4983 | https://www.okanoclinic.com/  | ○                  | ○                  | ペインクリニック<br>内科 | 岡野隆利<br>岡野千恵美                   |                                              |

電話や情報通信機器を用いて診療を実施する医療機関の一覧（東京都）

|      | 基本情報         |          |                          |              |                                                                                                         | 事務連絡に基づく対応について     |                    |                      |                              |                                              |
|------|--------------|----------|--------------------------|--------------|---------------------------------------------------------------------------------------------------------|--------------------|--------------------|----------------------|------------------------------|----------------------------------------------|
|      | 施設名          | 郵便番号     | 住所（都道府県から記載）             | 電話番号         | ウェブサイトURL                                                                                               | 初診の電話等を用いた診療の実施の有無 | 再診の電話等を用いた診療の実施の有無 | 対応診療科                | 担当医師名                        | 対面診療が必要と判断した場合に連携する医療機関名（複数ある場合は複数、住所も併せて記載） |
| 1531 | 北足立生協診療所     | 121-0836 | 東京都足立区入谷3-1-5            | 03-3896-9971 | <a href="http://kitaadachi-clinic.info/">http://kitaadachi-clinic.info/</a>                             |                    | ○                  | 内科<br>小児科            | 渡邊 隆将                        |                                              |
| 1532 | 北綾瀬駅前せたクリニック | 120-0006 | 東京都足立区谷中2-5-10カイ-ソイツ浅伊2F | 03-3628-8181 | <a href="https://seta.clinic/">https://seta.clinic/</a>                                                 |                    | ○                  | 消化器内科<br>内科<br>内視鏡内科 | 瀬田真祐                         | 東和病院(東京都足立区東和4-7-10)                         |
| 1533 | 北川医院         | 120-0037 | 東京都足立区千住河原町22-6          | 03-3881-0364 |                                                                                                         | ○                  | ○                  | 内科<br>小児科            | 北川泰久<br>石川貴子<br>金山勇吾<br>竹川幸男 |                                              |
| 1534 | 江北生協診療所      | 123-0872 | 東京都足立区江北2-24-1           | 03-3857-6636 | <a href="https://www.kouhoku-clinic.com/">https://www.kouhoku-clinic.com/</a>                           |                    | ○                  | 内科                   | 渡邊 郁夫                        |                                              |
| 1535 | 江北ファミリークリニック | 123-0872 | 東京都足立区江北5-1-1            | 03-3897-3030 | <a href="http://www.kohoku-fc.com/">http://www.kohoku-fc.com/</a>                                       |                    | ○                  | 内科、小児科               | 杉村久理                         |                                              |
| 1536 | 小宮耳鼻咽喉科医院    | 120-0034 | 東京都足立区千住1-13-10          | 03-3881-0981 |                                                                                                         | ○                  | ○                  | 耳鼻咽喉科                | 小宮 尚                         |                                              |
| 1537 | シオノアイクリニック   | 120-0006 | 東京都足立区谷中2-5-10           | 03-6802-6575 | <a href="https://shiono-eye-clinic.com/">https://shiono-eye-clinic.com/</a>                             | ○                  | ○                  | 眼科                   | 全医師                          |                                              |
| 1538 | 鹿浜診療所        | 123-0865 | 東京都足立区新田2-4-15           | 03-3912-8491 | <a href="http://cl-shikahama.com/">http://cl-shikahama.com/</a>                                         |                    | ○                  | 内科<br>小児科            | 平山陽子                         |                                              |
| 1539 | 島袋内科         | 120-0026 | 東京都足立区千住旭町43-11          | 03-3882-9083 | <a href="http://www7b.biglobe.ne.jp/shimabukuronaika/">http://www7b.biglobe.ne.jp/shimabukuronaika/</a> | ○                  | ○                  | 内科                   | 島袋 嘉修                        |                                              |

電話や情報通信機器を用いて診療を実施する医療機関の一覧（東京都）

|      | 基本情報                             |          |                             |               |                                         | 事務連絡に基づく対応について     |                    |                                          |                                                    |                                                                             |
|------|----------------------------------|----------|-----------------------------|---------------|-----------------------------------------|--------------------|--------------------|------------------------------------------|----------------------------------------------------|-----------------------------------------------------------------------------|
|      | 施設名                              | 郵便番号     | 住所（都道府県から記載）                | 電話番号          | ウェブサイトURL                               | 初診の電話等を用いた診療の実施の有無 | 再診の電話等を用いた診療の実施の有無 | 対応診療科                                    | 担当医師名                                              | 対面診療が必要と判断した場合に連携する医療機関名（複数ある場合は複数、住所も併せて記載）                                |
| 1540 | 成仁医院                             | 120-0002 | 東京都足立区中川4-29-12             | 050-3734-5021 | http://www.seijin.org/                  |                    | ○                  | 精神科                                      | 担当曜日による                                            |                                                                             |
| 1541 | 成仁病院                             | 121-8515 | 東京都足立区島根3-2-1               | 050-3734-5401 | http://www.seijin.org/                  |                    | ○                  | 精神科                                      | 担当曜日による                                            |                                                                             |
| 1542 | 椿1丁目内科クリニック                      | 123-0871 | 東京都足立区椿1-6-13               | 03-3890-1860  | http://tsubakinaika.com                 |                    | ○                  | 内科                                       | 大森 淳                                               |                                                                             |
| 1543 | 東京ふれあい医療生活協同組合<br>ふれあいファミリークリニック | 120-0047 | 東京都足立区宮城1-33-20             | 03-6908-4330  | https://www.fureaico-op.biz/            | ○                  | ○                  | 内科<br>小児科                                | 渡邊仁<br>角允博<br>倉信均<br>平原佐斗司<br>渡邊章                  | 梶原診療所（東京都北区堀船3-29-9）<br>明理会中央総合病院（東京都北区東十条3-22-11）<br>王子生協病院（東京都北区豊島3-4-15） |
| 1544 | 特定医療法人社団潤恵会<br>敬仁病院              | 123-0865 | 東京都足立区新田二丁目18番6号            | 03-3913-3106  | https://keijin-hospital.jp              |                    | ○                  | 内科・胃腸内科<br>外科・整形外科<br>外科・腎臓内科<br>科・循環器内科 | 柳沼 道郎<br>柳沼 行宏<br>柳沼 征人<br>大樋 信之<br>柳沼 樹宏<br>柳沼 憲志 |                                                                             |
| 1545 | とねり耳鼻いんこう科・アレルギー科                | 121-0831 | 東京都足立区舎人1-11-16             | 03-3897-3387  | https://toneri.jp/                      |                    | ○                  | 耳鼻いんこう科、小児耳鼻いんこう科、アレルギー科                 | 國井 直樹                                              |                                                                             |
| 1546 | とねり内科                            | 121-0831 | 東京都足立区舎人1-11-10             | 03-6803-1168  | https://toneri-naika.com/               | ○                  | ○                  | 内科<br>小児科                                | 中田 亮                                               |                                                                             |
| 1547 | 内科・脳神経外科<br>西原クリニック              | 123-0851 | 東京都足立区梅田5-25-33ロイヤルパークス梅島1F | 03-5888-5288  | http://www.nishihara-clinic.jp          | ○                  | ○                  | 内科<br>脳神経外科                              | 西原哲浩                                               |                                                                             |
| 1548 | なかじま整形外科小児科<br>クリニック             | 123-0862 | 東京都足立区皿沼1-16-5              | 03-5837-8070  | https://www.nakajima-clinic-adachi.com/ |                    | ○                  | 小児科                                      | 中島 由佳                                              |                                                                             |

電話や情報通信機器を用いて診療を実施する医療機関の一覧（東京都）

|      | 基本情報              |          |                          |              |                                 | 事務連絡に基づく対応について     |                    |                          |                        |                                              |
|------|-------------------|----------|--------------------------|--------------|---------------------------------|--------------------|--------------------|--------------------------|------------------------|----------------------------------------------|
|      | 施設名               | 郵便番号     | 住所（都道府県から記載）             | 電話番号         | ウェブサイトURL                       | 初診の電話等を用いた診療の実施の有無 | 再診の電話等を用いた診療の実施の有無 | 対応診療科                    | 担当医師名                  | 対面診療が必要と判断した場合に連携する医療機関名（複数ある場合は複数、住所も併せて記載） |
| 1549 | 西新井駅前さくら参道内科クリニック | 123-0843 | 東京都足立区西新井栄町2-3-3 2F      | 03-5888-6635 | http://www.sakurasando-cl.jp    |                    | ○                  | 内科、腎臓内科、循環器科、リウマチ科       | 齋藤 督芸<br>齋藤 穎          |                                              |
| 1550 | 野原耳鼻咽喉科医院         | 120-0026 | 東京都足立区千住旭町39-11          | 03-3870-2022 | https://www.nohara-ent.com/     | ○                  | ○                  | 耳鼻咽喉科                    | 野原 修                   | 東京慈恵会医科大学附属病院（東京都港区西新橋3-19-18）               |
| 1551 | 深見医院              | 121-1301 | 東京都足立区伊興3-2-1            | 03-3897-1301 | https://fukami-clinic.com       | ○                  | ○                  | 内科                       | 深見 公一                  |                                              |
| 1552 | ほつかクリニック          | 121-0072 | 東京都足立区保塚町18-15           | 03-3858-3822 | https://hotsuka-cl.jp/          | ○                  | ○                  | 内科/糖尿病内科/循環器内科/消化器内科/皮膚科 | 各担当医師                  |                                              |
| 1553 | ほつかこどもクリニック       | 121-0072 | 東京都足立区保塚町8-16 2階         | 03-5856-6930 | https://hotsukakodomo.jp/       | ○                  | ○                  | 小児科                      | 各担当医師                  |                                              |
| 1554 | まちどりクリニック         | 120-0005 | 東京都足立区綾瀬3-6-2 ボナール16ビル4F | 03-5673-0555 | http://machidori-cl.com/        |                    | ○                  | 心療内科<br>精神科              | 待鳥 浩司<br>藤巻 純 青木 淳一    |                                              |
| 1555 | 山一ビル内科クリニック       | 121-0815 | 東京都足立区島根3-8-1 山一ビル島根II1階 | 03-3884-8888 | http://www.yamaichi-bldg-mc.com | ○                  | ○                  | 内科<br>小児科                | 有野 亨<br>佐藤 敬太<br>土屋 昌史 |                                              |
| 1556 | 山田耳鼻咽喉科医院         | 120-0003 | 東京都足立区東和2-24-4           | 03-3620-8880 |                                 | ○                  | ○                  | 耳鼻咽喉科                    | 山田 一仁                  |                                              |
| 1557 | 横川レディースクリニック      | 121-0064 | 東京都足立区保木間1-2-2-15        | 03-3884-1241 | https://www.yklc.jp             |                    | ○                  | 小児科                      | 佐藤 御也子                 | 横川レディースクリニック（東京都足立区1-22-15）                  |

電話や情報通信機器を用いて診療を実施する医療機関の一覧（東京都）

|      | 基本情報                   |          |                              |              |                                                                                                 | 事務連絡に基づく対応について     |                    |                                     |                      |                                                                                      |
|------|------------------------|----------|------------------------------|--------------|-------------------------------------------------------------------------------------------------|--------------------|--------------------|-------------------------------------|----------------------|--------------------------------------------------------------------------------------|
|      | 施設名                    | 郵便番号     | 住所（都道府県から記載）                 | 電話番号         | ウェブサイトURL                                                                                       | 初診の電話等を用いた診療の実施の有無 | 再診の電話等を用いた診療の実施の有無 | 対応診療科                               | 担当医師名                | 対面診療が必要と判断した場合に連携する医療機関名（複数ある場合は複数、住所も併せて記載）                                         |
| 1558 | 渡辺整形外科                 | 120-0013 | 東京都足立区弘道1-3-27               | 03-3840-1551 | <a href="https://www.watanabe-clinic.or.jp/">https://www.watanabe-clinic.or.jp/</a>             |                    | ○                  | 整形外科<br>脳神経外科                       | 渡邊寧<br>渡邊熙<br>田地野和宏  |                                                                                      |
| 1559 | 和田小児科医院                | 121-0812 | 東京都足立区西保木間2-15-23            | 03-3884-2301 |                                                                                                 | ○                  | ○                  | 内科<br>小児科                           | 和田 紀之<br>和田 美穂       | 東京慈恵会医科大学付属病院（東京都港区西新橋3-9-18）<br>東京慈恵会医科大学葛飾医療センター（東京都葛飾区青戸6-41-2）                   |
| 1560 | 医社）福寿会 慈英会病院           | 121-0843 | 東京都足立区西新井栄町2-8-6             | 03-3852-1111 |                                                                                                 | ○                  | ○                  | 内科                                  | 多井 晃                 |                                                                                      |
| 1561 | 江北メンタルクリニック            | 123-0872 | 東京都足立区江北1-33-23ロイヤルKJ1階      | 03-5838-0797 | <a href="https://www.kohoku-mental.com/">https://www.kohoku-mental.com/</a>                     |                    | ○                  | 精神科                                 | 斎藤広生・中村 馨            |                                                                                      |
| 1562 | あさみファミリークリニック          | 125-0051 | 東京都葛飾区新宿3-15-2               | 03-3608-5577 | <a href="https://asami-familyclinic.jp">https://asami-familyclinic.jp</a>                       |                    | ○                  | 内科<br>小児科                           | 浅見育広                 |                                                                                      |
| 1563 | アリオ大島眼科                | 125-0061 | 東京都葛飾区亀有3-49-3アリオ亀有アリオモール2階  | 03-3602-2223 | <a href="http://www.ario-oshima.com/">http://www.ario-oshima.com/</a>                           |                    | ○                  | 眼科                                  | 大島 真                 |                                                                                      |
| 1564 | 医）いつき会ハートクリニック         | 124-0001 | 東京都小菅4-14-5レインボーヒルズ1F        | 03-3602-1810 | <a href="https://www.heartclinic-kazuki.jp/online">https://www.heartclinic-kazuki.jp/online</a> | ○                  | ○                  | 循環器内科<br>内科<br>小児循環器<br>心臓血管外科      | 佐藤一樹                 | 東部地域病院（東京都葛飾区西亀有5-14-1）<br>東京慈恵医科大学葛飾医療センター（東京都葛飾区青戸6-14-2）<br>平成立石病院（東京都葛飾区立石5-1-9） |
| 1565 | 医療法人社団 一秀会 葛飾橋病院       | 125-0041 | 東京都葛飾区東金町7-33-1              | 03-3607-0891 | <a href="http://www.katsushikabashi.jp/">http://www.katsushikabashi.jp/</a>                     |                    | ○                  | 精神科                                 | 尾内<br>柳田<br>杉山<br>桑本 |                                                                                      |
| 1566 | 医療法人社団 高志会 よつぎホームクリニック | 124-0011 | 東京都葛飾区四つ木1-47-12 ハルメディカルビル3階 | 03-5698-7715 | <a href="http://yotsugi-homeclinic.com/">http://yotsugi-homeclinic.com/</a>                     | ○                  | ○                  | 内科<br>循環器内科<br>消化器内科<br>皮膚科<br>整形外科 | 丸山 晴久                | 日本医科大学付属病院（東京都文京区千駄ヶ谷1-1-5）                                                          |

電話や情報通信機器を用いて診療を実施する医療機関の一覧（東京都）

|      | 基本情報                    |          |                             |              |                                               | 事務連絡に基づく対応について     |                    |                                          |                 |                                                         |
|------|-------------------------|----------|-----------------------------|--------------|-----------------------------------------------|--------------------|--------------------|------------------------------------------|-----------------|---------------------------------------------------------|
|      | 施設名                     | 郵便番号     | 住所（都道府県から記載）                | 電話番号         | ウェブサイトURL                                     | 初診の電話等を用いた診療の実施の有無 | 再診の電話等を用いた診療の実施の有無 | 対応診療科                                    | 担当医師名           | 対面診療が必要と判断した場合に連携する医療機関名（複数ある場合は複数、住所も併せて記載）            |
| 1567 | 医療法人社団さくら耳鼻咽喉科クリニック     | 124-0013 | 東京都葛飾区東立石3-25-12-101        | 03-5654-3387 | http://sakurajibi.com/                        | ○                  | ○                  | 耳鼻咽喉科                                    | 加賀田博子           |                                                         |
| 1568 | 医療法人社団讃紀会 オシダ眼科クリニック    | 124-0012 | 東京都葛飾区立石8丁目1-2 グレイスカメリア301号 | 03-3694-7123 | http://www.oshida-eye-clinic.com              | ○                  | ○                  | 眼科                                       | 忍田 太紀           |                                                         |
| 1569 | 医療法人社団十有会中山耳鼻咽喉科        | 125-0061 | 東京都葛飾区亀有3-7-7サンセリテ鞠子301     | 03-3838-8733 | www.nakajibi.or.jp                            | ○                  | ○                  | 耳鼻咽喉科                                    | 中山一美<br>中山尚樹    |                                                         |
| 1570 | 医療法人社団十有会中山耳鼻咽喉科青戸医院    | 125-0062 | 東京都葛飾区青戸3-37-6 holy.com3階   | 03-5629-8733 | www.nakajibi.or.jp                            | ○                  | ○                  | 耳鼻咽喉科                                    | 中山尚樹<br>中山一美    |                                                         |
| 1571 | 医療法人社団祥孝会柴又さくらクリニック     | 125-0052 | 東京都葛飾区柴又4-25-16 山本ビル1階      | 03-5693-1538 | http://www.shokkohkai-clinic.com/shibamata/   |                    | ○<br>電話のみ。条件あり。    | 皮膚科                                      | 溝口 雅子           |                                                         |
| 1572 | 医療法人社団双泉会 いずみホームケアクリニック | 125-0062 | 東京都葛飾区青戸5-30-4              | 03-3603-1717 | http://www.sosenkai.or.jp                     | ○                  | ○                  | 内科                                       | 豊田 千純子<br>堀元 寛美 |                                                         |
| 1573 | 医療法人社団智成会東金町内科クリニック     | 125-0041 | 東京都葛飾区東金町7-5-8 ロイヤルクレセント1階  | 03-5648-5715 | http://www2s.biglobe.ne.jp/~is_higaki/HKC.htm | ○                  | ○                  | 内科<br>小児科<br>消化器科                        | 石垣 宏            | イムス葛飾総合病院（東京都葛飾区西新小岩4丁目18-1）<br>東部地域病院（東京都葛飾区亀有5丁目14-1） |
| 1574 | 医療法人社団藤福会 小沼医院          | 125-0033 | 東京都葛飾区東水元2-10-2 1F          | 03-3607-4008 | http://www.onumacInc.com                      | ○                  | ○                  | 内科<br>消化器科<br>乳腺外科                       | 加藤 孝男<br>加藤 満利子 | 東部地域病院（東京都葛飾区亀有5丁目14-1）<br>日本医科大学病院（東京都文京区千駄木1-1-5）     |
| 1575 | 医療法人社団直和会 平成立石ペンギンクリニック | 124-0012 | 東京都葛飾区立石5-7-3               | 03-3692-3131 | http://www.heisei-tateishi.net/               |                    | ○                  | 内科<br>外科<br>整形外科<br>泌尿器科<br>脳神経外科<br>皮膚科 | 岩村 太郎<br>塩井 由美子 | 医療法人社団直和会 平成立石病院（東京都葛飾区立石5-1-9）                         |

電話や情報通信機器を用いて診療を実施する医療機関の一覧（東京都）

|      | 基本情報                     |          |                                  |              |                                                                                     | 事務連絡に基づく対応について     |                    |                       |                |                                              |
|------|--------------------------|----------|----------------------------------|--------------|-------------------------------------------------------------------------------------|--------------------|--------------------|-----------------------|----------------|----------------------------------------------|
|      | 施設名                      | 郵便番号     | 住所（都道府県から記載）                     | 電話番号         | ウェブサイトURL                                                                           | 初診の電話等を用いた診療の実施の有無 | 再診の電話等を用いた診療の実施の有無 | 対応診療科                 | 担当医師名          | 対面診療が必要と判断した場合に連携する医療機関名（複数ある場合は複数、住所も併せて記載） |
| 1576 | 医療法人社団ナイズ<br>キャップクリニック亀有 | 125-0061 | 東京都葛飾区亀有3-26-1 リリオ館6階            | 03-4579-2996 | <a href="https://www.caps-clinic.jp/kameari">https://www.caps-clinic.jp/kameari</a> | ○                  | ○                  | 内科<br>小児科             | 和田 知博          |                                              |
| 1577 | 医療法人社団博雅会大江<br>医院        | 124-0004 | 東京都葛飾区東堀切2-5-15                  | 03-3602-2096 | <a href="https://www.ooe-iin.com">https://www.ooe-iin.com</a>                       | ○                  | ○                  | 内科<br>小児科<br>消化器科     | 大江 毅           |                                              |
| 1578 | 医療法人社団美昭会 た<br>けなか眼科     | 125-0061 | 東京都葛飾区亀有5-20-11 Y.Sビル1F          | 03-5613-1235 |                                                                                     |                    | ○                  | 眼科                    | 竹中 千昭<br>湊原 幸恵 |                                              |
| 1579 | 医療法人社団裕栄会<br>高砂診療所       | 125-0054 | 東京都葛飾区高砂3-6-9-101                | 03-3659-3107 | <a href="http://www.takasagocl.com">http://www.takasagocl.com</a>                   |                    | ○                  | 内科<br>小児科             | 浦田 栄吉          |                                              |
| 1580 | 永寿堂医院                    | 125-0061 | 東京都葛飾区亀有3-4-3-5                  | 03-3604-2101 |                                                                                     | ○                  | ○                  | 小児科 内科                | 松永 貞一          |                                              |
| 1581 | えがおホームクリニック              | 125-0052 | 東京都葛飾区柴又5-33-2リバーサイドマンション<br>401 | 03-6657-8658 |                                                                                     |                    | ○                  | 内科<br>泌尿器科            | 中野 好透<br>中野 透  |                                              |
| 1582 | おぎわら耳鼻咽喉科クリ<br>ニック       | 125-0052 | 東京都葛飾区柴又1-4-10                   | 03-3627-3341 | <a href="https://www.ogiwara-ent-cl.com/">https://www.ogiwara-ent-cl.com/</a>       |                    | ○                  | 耳鼻咽喉科<br>小児科<br>気管食道科 | 荻原一郎           |                                              |
| 1583 | 小澤病院                     | 124-0022 | 東京都葛飾区奥戸2-31-3                   | 03-3692-7610 |                                                                                     | ○                  | ○                  | 内科                    | 小澤             |                                              |
| 1584 | お花茶屋こどもクリニッ<br>ク         | 124-0005 | 東京都葛飾区宝町2-34-13-115              | 03-5654-9462 | <a href="https://www.ohanjyaya-kodomo.jp/">https://www.ohanjyaya-kodomo.jp/</a>     |                    | ○                  | 小児科                   | 永友 祥子          |                                              |



電話や情報通信機器を用いて診療を実施する医療機関の一覧（東京都）

|      | 基本情報                    |          |                              |              |                                                                                 | 事務連絡に基づく対応について     |                    |                   |       |                                              |
|------|-------------------------|----------|------------------------------|--------------|---------------------------------------------------------------------------------|--------------------|--------------------|-------------------|-------|----------------------------------------------|
|      | 施設名                     | 郵便番号     | 住所（都道府県から記載）                 | 電話番号         | ウェブサイトURL                                                                       | 初診の電話等を用いた診療の実施の有無 | 再診の電話等を用いた診療の実施の有無 | 対応診療科             | 担当医師名 | 対面診療が必要と判断した場合に連携する医療機関名（複数ある場合は複数、住所も併せて記載） |
| 1585 | おんだ耳鼻咽喉科クリニック           | 125-0063 | 東京都葛飾区白鳥4-10-17コープみらい葛飾白鳥店2階 | 03-3690-6590 | <a href="https://www.onchan-clinic.com/">https://www.onchan-clinic.com/</a>     |                    | ○                  | 耳鼻咽喉科<br>小児耳鼻咽喉科  | 恩田 信人 |                                              |
| 1586 | かつしか江戸川病院               | 125-0054 | 東京都葛飾区高砂3-27-13              | 03-3672-1046 | <a href="http://katsushika-hp.com/">http://katsushika-hp.com/</a>               |                    | ○                  | 全診療科              | 各担当医  |                                              |
| 1587 | かつしか野村クリニック             | 125-0032 | 東京都葛飾区水元2-13-6福招会医療ビル1F      | 03-3826-5723 | <a href="http://www.nomura-clinic.jp">http://www.nomura-clinic.jp</a>           | ○                  | ○                  | 内科<br>消化器科<br>小児科 | 野村 哲也 |                                              |
| 1588 | 金町駅前脳神経内科<br>(名称変更手続き中) | 125-0042 | 東京都葛飾区金町6-4-3 金町メディカルモール401  | 03-5660-5211 | <a href="https://www.knoc.jp/">https://www.knoc.jp/</a>                         |                    | ○                  | 脳神経内科             | 内野勝行  | 新東京病院(千葉県松戸市和名ヶ谷1271)                        |
| 1589 | かなまち慈優クリニック             | 125-0041 | 東京都葛飾区東金町1-41-3 第5ウパノビル2階    | 03-3609-0133 | <a href="http://www.jiyu-clinic.jp">http://www.jiyu-clinic.jp</a>               | ○                  | ○                  | 内科<br>消化器内科       | 高山 哲朗 |                                              |
| 1590 | 金町診療所                   | 125-0041 | 東京都葛飾区東金町1-15-5              | 03-3607-5124 |                                                                                 |                    | ○                  | 内科                | 鈴木瑞史  |                                              |
| 1591 | 金町成人病クリニック              | 125-0041 | 東京都葛飾区東金町2-13-4              | 03-3826-6171 | <a href="https://www.kanja.jp/004183.html">https://www.kanja.jp/004183.html</a> |                    | ○                  | 内科                | 金哲宇   | あさひ病院（東京都足立区平野1-2-3）                         |
| 1592 | かめありこどもクリニック            | 125-0061 | 東京都葛飾区亀有3-14-9 プリムロウズ島田2F    | 03-3602-3206 | <a href="https://www.kanja.jp/017342html">https://www.kanja.jp/017342html</a>   | ○                  | ○                  | 小児科               | 角田 由理 |                                              |
| 1593 | 亀有メディカルクリニック            | 125-0061 | 東京都葛飾区亀有3-26-1 リリオ館6階        | 03-6231-2905 |                                                                                 |                    | ○                  | 内科<br>婦人科         | 塚田 健次 |                                              |

電話や情報通信機器を用いて診療を実施する医療機関の一覧（東京都）

|      | 基本情報          |          |                               |              |                                                                                               | 事務連絡に基づく対応について     |                    |                                       |                        |                                              |
|------|---------------|----------|-------------------------------|--------------|-----------------------------------------------------------------------------------------------|--------------------|--------------------|---------------------------------------|------------------------|----------------------------------------------|
|      | 施設名           | 郵便番号     | 住所（都道府県から記載）                  | 電話番号         | ウェブサイトURL                                                                                     | 初診の電話等を用いた診療の実施の有無 | 再診の電話等を用いた診療の実施の有無 | 対応診療科                                 | 担当医師名                  | 対面診療が必要と判断した場合に連携する医療機関名（複数ある場合は複数、住所も併せて記載） |
| 1594 | 黒木整形外科内科クリニック | 124-0021 | 東京都葛飾区細田3-29-15               | 03-3672-9611 | <a href="http://www.kuroki-seikei.jp/">http://www.kuroki-seikei.jp/</a>                       | ○                  | ○                  | 整形外科<br>内科                            | 黒木 啓之<br>山田 直樹<br>谷 英明 |                                              |
| 1595 | 小泉胃腸肛門クリニック   | 125-0042 | 東京都葛飾区金町6-4-3金町メディカルモール内102   | 03-3627-1300 | <a href="https://koizumi-gip-clinic.com/">https://koizumi-gip-clinic.com/</a>                 | ○                  | ○                  | 胃腸内科<br>肛門外科<br>乳腺科                   | 小泉和也                   |                                              |
| 1596 | 佐久間医院         | 124-0023 | 東京都葛飾区東新小岩1-7-10              | 03-3694-3811 |                                                                                               | ○                  | ○                  | 内科<br>耳鼻科                             | 中原 國廣<br>岡村 洋沖         |                                              |
| 1597 | 新葛飾ロイヤルクリニック  | 124-0006 | 東京都葛飾区堀切2-66-17               | 03-3697-8333 | <a href="http://www.ims.gr.jp/katsushika-clinic/">http://www.ims.gr.jp/katsushika-clinic/</a> |                    | ○                  | 内科<br>心臓血管外科<br>整形外科<br>脳神経外科<br>泌尿器科 | 鷺原 規喜                  |                                              |
| 1598 | 新小岩駅前総合クリニック  | 124-0024 | 東京都葛飾区新小岩2-1-1 リーフコンフォート新小岩3階 | 03-5678-5616 | <a href="https://shinkoiwa.towakai.com/">https://shinkoiwa.towakai.com/</a>                   |                    | ○                  | 内科                                    | 谷川 太志                  |                                              |
| 1599 | 新小岩北口診療所      | 129-0025 | 東京都葛飾区西新小岩1-8-4山口ビル1F         | 03-5670-2826 |                                                                                               |                    | ○                  | 外科<br>内科                              | 拝殿 清名                  |                                              |
| 1600 | 新小岩すばるクリニック   | 124-0024 | 東京都葛飾区新小岩2-1-1 リーフコンフォート新小岩2階 | 03-5678-6550 | <a href="https://shinkoiwa-subaru.towakai.com/">https://shinkoiwa-subaru.towakai.com/</a>     |                    | ○                  | 耳鼻咽喉科                                 | 古沢 純                   |                                              |
| 1601 | 新小岩ゆり医院       | 124-0024 | 東京都葛飾区新小岩2-9-14 長尾第2ビル2F      | 03-5662-3301 |                                                                                               | ○                  | ○                  | 耳鼻科                                   | 岡村 洋沖                  |                                              |
| 1602 | 新小岩わんぱくクリニック  | 124-0024 | 東京都葛飾区新小岩2-1-1 リーフコンフォート新小岩3階 | 03-6231-5512 | <a href="https://shinkoiwa-wanpaku.towakai.com/">https://shinkoiwa-wanpaku.towakai.com/</a>   |                    | ○                  | 小児科                                   | 安井 孝二郎                 |                                              |

電話や情報通信機器を用いて診療を実施する医療機関の一覧（東京都）

|      | 基本情報              |          |                               |              |                                                                                                       | 事務連絡に基づく対応について     |                    |                         |                      |                                              |
|------|-------------------|----------|-------------------------------|--------------|-------------------------------------------------------------------------------------------------------|--------------------|--------------------|-------------------------|----------------------|----------------------------------------------|
|      | 施設名               | 郵便番号     | 住所（都道府県から記載）                  | 電話番号         | ウェブサイトURL                                                                                             | 初診の電話等を用いた診療の実施の有無 | 再診の電話等を用いた診療の実施の有無 | 対応診療科                   | 担当医師名                | 対面診療が必要と判断した場合に連携する医療機関名（複数ある場合は複数、住所も併せて記載） |
| 1603 | 鈴木内科・糖尿病クリニック     | 124-0025 | 東京都葛飾区西新小岩1-2-8第一鈴亀ビル4階       | 03-3694-1071 | <a href="https://www.suzuki-naika.org">https://www.suzuki-naika.org</a>                               | ○                  | ○                  | 内科<br>糖尿病内科             | 鈴木一成<br>二見章子<br>橋本雅夫 | 東京臨海病院（東京都江戸川区臨海町）                           |
| 1604 | セリざわ医院            | 124-0003 | 東京都葛飾区お花茶屋2-15-5              | 03-3601-3361 | <a href="https://www.serizawa-cl.com/">https://www.serizawa-cl.com/</a>                               | ○                  | ○                  | 内科小児科                   | 芹澤直紀                 |                                              |
| 1605 | 高木皮膚科医院           | 125-0061 | 東京都葛飾区亀有3-33-4                | 03-3601-2218 |                                                                                                       |                    | ○                  | 皮膚科                     | 高木道生・奈緒              |                                              |
| 1606 | 高砂駅前消化器内科・外科クリニック | 125-0054 | 東京都葛飾区高砂2-40-5高砂駅前クリニックモール101 | 03-3657-0123 | <a href="https://takasago.clinic/">https://takasago.clinic/</a>                                       | ○                  | ○                  | 内科・消化器                  | 松浦芳文                 |                                              |
| 1607 | ツルヤ外科内科クリニック      | 125-0061 | 東京都葛飾区亀有3-18-1鶴屋ビル2階          | 03-5876-6722 | <a href="https://www.tsuruya-clinic.com/">https://www.tsuruya-clinic.com/</a>                         | ○                  | ○                  | 内科                      | 川村 純                 | 東部地域病院（東京都葛飾区亀有五丁目14-1）                      |
| 1608 | 東京慈恵会医科大学葛飾医療センター | 125-8506 | 東京都葛飾区青戸6-41-2                | 03-3603-2111 | <a href="http://www.jikei.ac.jp/hospital/katsushika/">http://www.jikei.ac.jp/hospital/katsushika/</a> |                    | ○                  | 外来診療を行う全ての診療科           | 左記診療科の外来担当医          |                                              |
| 1609 | 中沢内科胃腸科医院         | 125-0042 | 東京都葛飾区金町6-9-2                 | 03-3608-4976 | <a href="https://www.nakazawa-naika.com">https://www.nakazawa-naika.com</a>                           |                    | ○                  | 内科<br>胃腸科<br>小児科<br>皮膚科 | 中澤 幸弘<br>中澤 幸史       |                                              |
| 1610 | 中村内科              | 125-0062 | 東京都葛飾区青戸3-39-15               | 03-3603-5501 |                                                                                                       |                    | ○                  | 内科<br>消化器科<br>循環器科      | 中村 正明                | （公財）東京都保健医療公社 東部地域病院（東京都葛飾区亀有5-14-1）         |
| 1611 | 新宿診療所             | 125-0052 | 東京都葛飾区柴又1-37-5                | 03-3607-2850 |                                                                                                       | ○                  | ○                  | 内科<br>外科<br>整形外科        | 深澤 正樹                |                                              |

電話や情報通信機器を用いて診療を実施する医療機関の一覧（東京都）

|      | 基本情報                   |          |                              |              |                                                                                     | 事務連絡に基づく対応について     |                    |               |                         |                                              |
|------|------------------------|----------|------------------------------|--------------|-------------------------------------------------------------------------------------|--------------------|--------------------|---------------|-------------------------|----------------------------------------------|
|      | 施設名                    | 郵便番号     | 住所（都道府県から記載）                 | 電話番号         | ウェブサイトURL                                                                           | 初診の電話等を用いた診療の実施の有無 | 再診の電話等を用いた診療の実施の有無 | 対応診療科         | 担当医師名                   | 対面診療が必要と判断した場合に連携する医療機関名（複数ある場合は複数、住所も併せて記載） |
| 1612 | 平木こどもクリニック             | 124-0014 | 東京都葛飾区東四つ木1-20-2             | 03-5671-0577 | <a href="http://www.hiraki-kodomo-cl.com">http://www.hiraki-kodomo-cl.com</a>       |                    | ○                  | 小児科<br>内科     | 平木 洋子<br>平木 達朗          |                                              |
| 1613 | 翠皮フ科・アレルギー科            | 125-0061 | 東京都葛飾区亀有3-37-17              | 03-6662-4232 | <a href="http://midorihifuka.jp">http://midorihifuka.jp</a>                         |                    | ○                  | 皮膚科<br>アレルギー科 | 飯塚 仁                    |                                              |
| 1614 | 山口医院                   | 125-0052 | 東京都葛飾区柴又4-16-2               | 03-3657-3601 | <a href="http://yamaguchiiin.web.fc2.com/">http://yamaguchiiin.web.fc2.com/</a>     |                    | ○                  | 内科            | 山口和彦                    |                                              |
| 1615 | 立石こころクリニック             | 124-0012 | 東京都葛飾区立石4-26-9               | 03-3697-6488 | <a href="https://tateishi-cocoro.com">https://tateishi-cocoro.com</a>               |                    | ○                  | 精神科           | 熊倉 荘一                   |                                              |
| 1616 | かつしか心身総合クリニック          | 125-0041 | 東京都葛飾区東金町1-41-1桜井ビル2階        | 03-3627-0233 | <a href="https://famille.or.jp/">https://famille.or.jp/</a>                         |                    | ○                  | 内科<br>心療内科    | 駒形 清則<br>大川 昭宏<br>永井 斐子 |                                              |
| 1617 | 医)東京育明会よつば皮膚科          | 132-0035 | 東京都江戸川区4-11-5平井イスズビル2階       | 03-3637-1112 | <a href="http://www.ikumeikai.tokyo/yotsuba">http://www.ikumeikai.tokyo/yotsuba</a> |                    | ○                  | 皮膚科           | 三井 洋美                   |                                              |
| 1618 | 一之江けいゆう整形外科クリニック       | 132-0024 | 東京都江戸川区一之江7-35-22 一富ビルディング3F | 03-6905-9666 | <a href="http://ku-seikei.com/">http://ku-seikei.com/</a>                           | ○                  | ○                  | 整形外科          | 酒井 均                    |                                              |
| 1619 | 医療法人社団あさかぜ会北小岩胃腸科クリニック | 133-0051 | 東京都江戸川区北小岩4-8-3              | 03-3672-2865 |                                                                                     | ○                  | ○                  | 内科            | 猪又 雄一                   |                                              |
| 1620 | 医療法人社団茜遥会目々澤醫院         | 133-0051 | 東京都江戸川区北小岩4-5-8              | 03-3657-5470 | <a href="http://www.memezawa.com/med">http://www.memezawa.com/med</a>               | ○                  | ○                  | 内科<br>神経内科    | 目々澤 肇                   |                                              |

電話や情報通信機器を用いて診療を実施する医療機関の一覧（東京都）

|      | 基本情報                   |          |                         |              |                                       | 事務連絡に基づく対応について     |                    |                                       |                                 |                                                                                                                                                            |
|------|------------------------|----------|-------------------------|--------------|---------------------------------------|--------------------|--------------------|---------------------------------------|---------------------------------|------------------------------------------------------------------------------------------------------------------------------------------------------------|
|      | 施設名                    | 郵便番号     | 住所（都道府県から記載）            | 電話番号         | ウェブサイトURL                             | 初診の電話等を用いた診療の実施の有無 | 再診の電話等を用いた診療の実施の有無 | 対応診療科                                 | 担当医師名                           | 対面診療が必要と判断した場合に連携する医療機関名（複数ある場合は複数、住所も併せて記載）                                                                                                               |
| 1621 | 医療法人親和会 英診療所           | 132-0021 | 東京都江戸川区中央3-20-10        | 03-5661-5888 | http://www.houei.or.jp                | ○                  | ○                  | 全診療科                                  | 各担当医師                           |                                                                                                                                                            |
| 1622 | 医療法人社団つむぎ会守島医院         | 133-0057 | 東京都江戸川区西小岩1-16-6        | 03-3671-3711 | https://www.morishima-iin.net/        | ○                  | ○                  | 内科                                    | 守島 亜季                           |                                                                                                                                                            |
| 1623 | 医療法人社団津端会 京葉病院         | 132-0025 | 東京都江戸川区松江2-43-12        | 03-3654-8211 | http://www.keiyo-hp.jp/               | ○                  | ○                  | 外科<br>整形外科<br>内科                      | 津端 徹<br>津端 仁<br>平井 倫世<br>佐藤 利知子 | 東京臨海病院（東京都江戸川区臨海町1-4-2）<br>社会福祉法人仁生社江戸川病院（東京都江戸川区東小岩2-24-18）<br>東京ベイ浦安・市川医療センター（千葉県浦安市当代島3-4-32）                                                           |
| 1624 | 医療法人社団同愛会病院            | 132-0031 | 東京都江戸川区松島1-42-21        | 0570-08-3311 | https://www.douaikai.jp               |                    | ○<br>薬の処方対応のみ      | 内科<br>外科<br>整形外科<br>眼科<br>泌尿器科<br>皮膚科 | 各担当医師                           |                                                                                                                                                            |
| 1625 | 医療法人社団ナイズ キャップクリニック北葛西 | 134-0081 | 東京都江戸川区北葛西5-15-2        | 03-4579-0040 | https://www.caps-clinic.jp/kitakasai  | ○                  | ○                  | 内科 小児科                                | 森 博子                            | 順天堂大学医学部附属 浦安病院（千葉県浦安市富岡2丁目1-1）<br>東京ベイ浦安市川医療センター（千葉県浦安市当代島3丁目4-32）<br>東京臨海病院（東京都江戸川区臨海町1丁目4-2）<br>森山記念病院（東京都江戸川区北葛西4丁目3-1）<br>東京都立墨東病院（東京都墨田区江東橋4丁目23-15） |
| 1626 | 医療法人社団ナイズ キャップクリニック西葛西 | 134-0088 | 東京都江戸川区西葛西6-12-1 関寅ビル第二 | 03-4579-9217 | https://www.caps-clinic.jp/nishikasai | ○                  | ○                  | 小児科                                   | 伊東 真隆                           |                                                                                                                                                            |
| 1627 | 医療法人社団向日葵会 まつしま病院      | 132-0031 | 東京都江戸川区松島1-41-29        | 03-3653-5541 | http://www.matsushima-wh.or.jp/       |                    | ○                  | 小児科<br>心療内科                           | 益原千加<br>古池織恵                    |                                                                                                                                                            |
| 1628 | 医療法人社団 結草会 みやのこどもクリニック | 134-0085 | 東京都江戸川区南葛西2-18-27       | 03-3869-4133 | https://www.miyano-kids.jp            | ○                  | ○                  | 小児科皮膚科                                | 宮野孝一                            |                                                                                                                                                            |
| 1629 | 葛西昌医会病院                | 134-8678 | 東京都江戸川区東葛西6-30-3        | 03-5696-1611 | http://www.shoikai.com                |                    | ○                  | 外来診療科全て                               | 各担当医師                           |                                                                                                                                                            |

電話や情報通信機器を用いて診療を実施する医療機関の一覧（東京都）

|      | 基本情報                  |          |                               |              |                                                                                                             | 事務連絡に基づく対応について     |                    |                 |                              |                                              |
|------|-----------------------|----------|-------------------------------|--------------|-------------------------------------------------------------------------------------------------------------|--------------------|--------------------|-----------------|------------------------------|----------------------------------------------|
|      | 施設名                   | 郵便番号     | 住所（都道府県から記載）                  | 電話番号         | ウェブサイトURL                                                                                                   | 初診の電話等を用いた診療の実施の有無 | 再診の電話等を用いた診療の実施の有無 | 対応診療科           | 担当医師名                        | 対面診療が必要と判断した場合に連携する医療機関名（複数ある場合は複数、住所も併せて記載） |
| 1630 | くれもとクリニック             | 134-0081 | 東京都江戸川区北葛西4-1-45-102          | 03-5658-8777 |                                                                                                             | ○                  | ○                  | 小児科<br>内科       | 呉本 慶子                        | 東京臨海病院（東京都江戸川区臨海町1-4-2）                      |
| 1631 | 小岩すばるクリニック            | 133-0052 | 東京都江戸川区東小岩4-5-4 金本ビル2階        | 03-5693-3349 | <a href="https://koiwa-subaru.towakai.com/">https://koiwa-subaru.towakai.com/</a>                           |                    | ○                  | 耳鼻咽喉科           | 國方 竜太郎                       |                                              |
| 1632 | 酒井内科・神経内科クリニック        | 146-0085 | 東京都江戸川区西葛西6-15-20 アイビーハイツ2F   | 03-6808-2807 | <a href="https://sakai-cl.jp">https://sakai-cl.jp</a>                                                       | ○                  | ○                  | 内科<br>脳神経内科     | 酒井 宏一郎                       |                                              |
| 1633 | さくらライフ江戸川クリニック        | 132-0021 | 東京都江戸川区中央4-11-8アルカディア親水公園ビル1F | 03-6868-7851 | <a href="http://www.slclinic.com/aboutus/edogawaclinic/">http://www.slclinic.com/aboutus/edogawaclinic/</a> | ○                  |                    | 内科、精神科、<br>心療内科 | 茂呂勝美<br>山口順嗣<br>渡会昌広<br>古坂隆幸 |                                              |
| 1634 | 篠崎駅前クリニック             | 133-0061 | 東京都江戸川区篠崎町2-7-1               | 03-5666-1331 | <a href="https://shinozaki-clinic.tums.jp/">https://shinozaki-clinic.tums.jp/</a>                           |                    | ○                  | 内科              | 岡田 吉弘                        |                                              |
| 1635 | 篠崎駅前わんぱくクリニック         | 133-0061 | 東京都江戸川区篠崎町2-7-15 エスタシオン篠崎1階   | 03-5879-8871 | <a href="https://shinozakiwanpaku-clinic.tums.jp/">https://shinozakiwanpaku-clinic.tums.jp/</a>             |                    | ○                  | 小児科             | 川島 陽介                        |                                              |
| 1636 | 社会福祉法人仁生社 江戸川病院       | 133-0052 | 東京都江戸川区東小岩2-24-18             | 03-3673-1221 | <a href="https://www.edogawa.or.jp/">https://www.edogawa.or.jp/</a>                                         |                    | ○                  | 全科              | 全医師                          |                                              |
| 1637 | 社会福祉法人仁生社 メディカルプラザ江戸川 | 133-0052 | 東京都江戸川区東小岩2-6-1               | 03-3673-4892 | <a href="https://www.edogawa.or.jp/">https://www.edogawa.or.jp/</a>                                         |                    | ○                  | 全科              | 全医師                          |                                              |
| 1638 | 社会福祉法人仁生社 江戸川メディケア病院  | 133-0071 | 東京都江戸川区東松本2-14-12             | 03-3657-1181 | <a href="https://edogawa-medicare.jp/">https://edogawa-medicare.jp/</a>                                     |                    | ○                  | 全外来診療科          | 各担当医師                        |                                              |

電話や情報通信機器を用いて診療を実施する医療機関の一覧（東京都）

|      | 基本情報                    |          |                             |              |                                            | 事務連絡に基づく対応について     |                    |                                                       |                   |                                              |
|------|-------------------------|----------|-----------------------------|--------------|--------------------------------------------|--------------------|--------------------|-------------------------------------------------------|-------------------|----------------------------------------------|
|      | 施設名                     | 郵便番号     | 住所（都道府県から記載）                | 電話番号         | ウェブサイトURL                                  | 初診の電話等を用いた診療の実施の有無 | 再診の電話等を用いた診療の実施の有無 | 対応診療科                                                 | 担当医師名             | 対面診療が必要と判断した場合に連携する医療機関名（複数ある場合は複数、住所も併せて記載） |
| 1639 | 社会医療法人社団森山医会 森山記念病院     | 134-0081 | 東京都江戸川区北葛西4-3-1             | 03-5679-1211 | http://mk.moriyamaikai.or.jp/              |                    | ○                  | 脳神経外科<br>糖尿・内分泌内科<br>大腸・肛門外科<br>整形外科<br>外科<br>循環器内科   | 対応診療科の常勤医と一部の非常勤医 | 自院にて対応                                       |
| 1640 | 社会医療法人社団森山医会森山脳神経センター病院 | 134-0088 | 東京都江戸川区西葛西7-12-7            | 03-3675-1211 | http://mr.moriyamaikai.or.jp/              |                    | ○                  | 内科<br>脳神経外科<br>循環器内科<br>神経内科<br>内分泌科<br>泌尿器科<br>大腸肛門科 | 眼科を除くすべての外来診療担当医師 | 社会医療法人社団森山医会 森山記念病院（東京都江戸川区北葛西4-3-1）         |
| 1641 | 親和ハートフルクリニック            | 132-0035 | 東京都江戸川区平井2-15-15 アポロンビル2F   | 03-3684-7150 | http://www.ikumeikai.tokyo/shinwa          | ○                  | ○                  | 内科                                                    | 篠崎美樹子             |                                              |
| 1642 | 東京みらいクリニック葛西            | 134-0083 | 東京都江戸川区中葛西5-34-8須賀ビル1F      | 03-3680-5560 | https://tokyomiraiclinic-kasai.com/        |                    | ○                  | 小児科<br>内科                                             | 古屋 彩夏             |                                              |
| 1643 | にいほりクリニック               | 132-0001 | 東京都江戸川区新堀1-38-11            | 03-5243-4141 | https://niihori-cl.jp/                     | ○                  | ○                  | 内科/循環器内科/皮膚科                                          | 各担当医師             |                                              |
| 1644 | 西葛西駅前総合クリニック            | 134-0088 | 東京都江戸川区西葛西3-15-13 第一江の本ビル3階 | 03-5679-7851 | https://nishikasai.towakai.com/            |                    | ○                  | 内科                                                    | 波多野 良二            |                                              |
| 1645 | 西葛西わんぱくクリニック            | 134-0088 | 東京都江戸川区西葛西3-15-13 第一江の本ビル2階 | 03-5679-7851 | https://nishikasai-wanpaku.towakai.com/    |                    | ○                  | 小児科                                                   | 山田 浩之             |                                              |
| 1646 | 東小岩げんきクリニック             | 133-0052 | 東京都江戸川区東小岩4-5-2 神奈川ビル2階     | 03-5612-3702 | https://higashikoiiwa-genki.towakai.com/   |                    | ○                  | 内科                                                    | 山下 智子             |                                              |
| 1647 | 東小岩わんぱくクリニック            | 133-0052 | 東京都江戸川区東小岩4-5-2 神奈川ビル1階     | 03-5612-3754 | https://higashikoiiwa-wanpaku.towakai.com/ |                    | ○                  | 小児科                                                   | 小島 博之             |                                              |

電話や情報通信機器を用いて診療を実施する医療機関の一覧（東京都）

|      | 基本情報          |          |                              |              |                                                                                     | 事務連絡に基づく対応について     |                    |                                   |                         |                                              |
|------|---------------|----------|------------------------------|--------------|-------------------------------------------------------------------------------------|--------------------|--------------------|-----------------------------------|-------------------------|----------------------------------------------|
|      | 施設名           | 郵便番号     | 住所（都道府県から記載）                 | 電話番号         | ウェブサイトURL                                                                           | 初診の電話等を用いた診療の実施の有無 | 再診の電話等を用いた診療の実施の有無 | 対応診療科                             | 担当医師名                   | 対面診療が必要と判断した場合に連携する医療機関名（複数ある場合は複数、住所も併せて記載） |
| 1648 | 平井駅前総合クリニック   | 132-0035 | 東京都江戸川区平井3-23-18 光井グランドハイツ2階 | 03-5875-3377 | <a href="https://hirai.towakai.com/">https://hirai.towakai.com/</a>                 |                    | ○                  | 内科                                | 豊田 紀夫                   |                                              |
| 1649 | 平井すばるクリニック    | 132-0035 | 東京都江戸川区平井3-23-18 光井グランドハイツ1階 | 03-5875-1161 | <a href="https://hirai-subaru.towakai.com/">https://hirai-subaru.towakai.com/</a>   |                    | ○                  | 耳鼻咽喉科                             | 小島 慎平                   |                                              |
| 1650 | 船堀ゆり医院        | 134-0091 | 東京都江戸川区船堀1-4-13 シャンサル船堀2F    | 03-5605-3301 |                                                                                     | ○                  | ○                  | 耳鼻科                               | 岡村 洋沖                   |                                              |
| 1651 | 松江病院          | 132-0025 | 東京都江戸川区松江2-6-15              | 03-3652-3121 | <a href="https://matue.or.jp/">https://matue.or.jp/</a>                             |                    | ○                  | 内科<br>外科<br>脳神経外科<br>胃腸外科<br>整形外科 | 山田 徹<br>宮本 竜之<br>宮崎 紀樹等 |                                              |
| 1652 | まなべファミリークリニック | 134-0085 | 東京都江戸川区南葛西6-12-7             | 03-3869-1525 | <a href="https://www.manabe-medical.com/">https://www.manabe-medical.com/</a>       | ○                  | ○                  | 小児科 内科                            | 眞鍋周太郎                   |                                              |
| 1653 | 瑞江すばるクリニック    | 133-0065 | 東京都江戸川区南篠崎町3-1-2 渡辺ビル1階      | 03-5636-1061 | <a href="https://mizue-subaru.towakai.com/">https://mizue-subaru.towakai.com/</a>   |                    | ○                  | 耳鼻咽喉科                             | 上村 隆一郎                  |                                              |
| 1654 | 瑞江総合クリニック     | 133-0065 | 東京都江戸川区南篠崎町3-1-2 渡辺ビル2階      | 03-5664-6588 | <a href="https://mizue.towakai.com/">https://mizue.towakai.com/</a>                 |                    | ○                  | 内科                                | 松原 顕次                   |                                              |
| 1655 | 瑞江わんぱくクリニック   | 133-0065 | 東京都江戸川区南篠崎町3-1-2 渡辺ビル1階      | 03-3698-6531 | <a href="https://mizue-wanpaku.towakai.com/">https://mizue-wanpaku.towakai.com/</a> |                    | ○                  | 小児科                               | 室伏 航                    |                                              |
| 1656 | 葛西こころのクリニック   | 134-0084 | 東京都江戸川区東葛西6-1-17-702         | 03-5878-0526 | <a href="https://kasai-kokoro.com/">https://kasai-kokoro.com/</a>                   |                    | ○                  | 精神科、心療内科                          |                         |                                              |



電話や情報通信機器を用いて診療を実施する医療機関の一覧（東京都）

|      | 基本情報                     |          |                                  |              |                                   | 事務連絡に基づく対応について     |                    |                      |              |                                              |
|------|--------------------------|----------|----------------------------------|--------------|-----------------------------------|--------------------|--------------------|----------------------|--------------|----------------------------------------------|
|      | 施設名                      | 郵便番号     | 住所（都道府県から記載）                     | 電話番号         | ウェブサイトURL                         | 初診の電話等を用いた診療の実施の有無 | 再診の電話等を用いた診療の実施の有無 | 対応診療科                | 担当医師名        | 対面診療が必要と判断した場合に連携する医療機関名（複数ある場合は複数、住所も併せて記載） |
| 1657 | 西葛西メディカルクリニック            | 134-0088 | 東京都江戸川区西葛西6-18-3                 | 03-3686-3637 | http://nishikasai-cl.com          | ○                  | ○                  | 内科<br>循環器内科<br>糖尿病内科 | 田寺 長         |                                              |
| 1658 | イーアス高尾眼科                 | 193-0834 | 東京都八王子市東浅川町550-1 イーアス高尾2F        | 042-673-5111 | https://iiastakao.navi-clinic.jp/ |                    | ○                  | 眼科                   | 宮本 桂一        |                                              |
| 1659 | 市川内科クリニック                | 192-0072 | 東京都八王子市南町3-5シュゼル八王子1F            | 042-620-2272 | http://ai-cli.jp/                 | ○                  | ○                  | 内科                   | 市川和人         |                                              |
| 1660 | 医) 岳 内科・循環器内科<br>クリニック高田 | 192-0363 | 東京都八王子市別所2-2-1 1F                | 042-670-2039 | http://www.clinic-takata.com/     |                    | ○                  | 内科のみ                 | 高田 博之        | 多摩南部地域病院（東京都多摩市）                             |
| 1661 | 医) 慈聖会 鈴木診療所             | 192-0904 | 東京都八王子市子安町2-10-14                | 042-642-3923 | http://www.suzushin3923.jp/       |                    | ○                  | 内科<br>小児科            | 笹本和男<br>笹本優佳 |                                              |
| 1662 | (医社) 古谷医院                | 192-0916 | 東京都八王子市みなみ野1-2-1アクロスモール八王子みなみ野2階 | 042-632-6866 | https://furuya-iin.com/           |                    | ○                  | 内科<br>小児科            | 古谷 利通        | 東京医科大学八王子医療センター（東京都八王子市館町1163番地）             |
| 1663 | いしづか内科クリニック              | 193-0832 | 東京都八王子市散田町3-13-6                 | 042-668-0841 |                                   |                    | ○                  | 内科                   | 石塚 太一        |                                              |
| 1664 | いずみクリニック                 | 192-0904 | 東京都八王子市子安町1-11-9                 | 042-649-4032 | http://www.izumiclinic.jp/        | ○                  | ○                  | 内科<br>脳神経内科<br>小児科   | 堀内泉          |                                              |
| 1665 | 医療法人社団松濤会 伊藤内科クリニック      | 192-0046 | 東京都八王子市明神町4-2-7 秀和第一八王子レジデンス102  | 042-644-2770 | http://netsite.co.jp/dr_itoh/     |                    | ○                  | 内科                   | 伊藤 秀二        |                                              |

電話や情報通信機器を用いて診療を実施する医療機関の一覧（東京都）

|      | 基本情報                              |          |                                   |              |                                                                                                                               | 事務連絡に基づく対応について     |                    |                                                                 |                                                             |                                                                  |
|------|-----------------------------------|----------|-----------------------------------|--------------|-------------------------------------------------------------------------------------------------------------------------------|--------------------|--------------------|-----------------------------------------------------------------|-------------------------------------------------------------|------------------------------------------------------------------|
|      | 施設名                               | 郵便番号     | 住所（都道府県から記載）                      | 電話番号         | ウェブサイトURL                                                                                                                     | 初診の電話等を用いた診療の実施の有無 | 再診の電話等を用いた診療の実施の有無 | 対応診療科                                                           | 担当医師名                                                       | 対面診療が必要と判断した場合に連携する医療機関名（複数ある場合は複数、住所も併せて記載）                     |
| 1666 | 医療法人社団 玉栄会<br>東京天使病院附属駅前<br>クリニック | 192-0046 | 東京都八王子市明神町4-6-2<br>シャンボール京王八王子1階  | 042-656-0075 | <a href="https://angelcourt.or.jp/clinic/">https://angelcourt.or.jp/clinic/</a>                                               |                    | ○                  | 内科                                                              | 中村 昌平<br>今西 愿<br>高崎 雄司<br>坂巻 文雄<br>近藤 祐介<br>星川 賀織<br>岡部 多加志 |                                                                  |
| 1667 | 医療法人社団おなか会お<br>なかクリニック            | 192-0083 | 東京都八王子市旭町12-12                    | 042-644-1127 | <a href="https://www.m-onaka.com">https://www.m-onaka.com</a>                                                                 | ○                  | ○                  | 内科<br>外科<br>肛門外科                                                | 村井 隆三<br>羽田 丈紀<br>小幡 和彦                                     |                                                                  |
| 1668 | 医療法人社団KNI<br>北原リハビリテーション<br>病院    | 192-0012 | 東京都八王子市左入町461                     | 042-692-3332 |                                                                                                                               |                    | ○                  | リハビリテー<br>ション科                                                  | 西谷 和敏<br>檀 充                                                | 北原国際病院<br>北原ライフサポートクリニック                                         |
| 1669 | 医療法人社団KNI北原国際<br>病院               | 192-0045 | 東京都八王子市大和田町一丁目7番23号               | 042-645-1356 | <a href="https://kokusai.kitaharahosp.com/">https://kokusai.kitaharahosp.com/</a>                                             |                    | ○                  | 脳神経外科<br>循環器内科<br>神経内科<br>精神科<br>消化器内科                          | 各診療科担当医                                                     |                                                                  |
| 1670 | 医療法人社団KNI北原ライ<br>フサポートクリニック       | 192-0904 | 東京都八王子市安町4-7-1サザンスカイトワー<br>八王子1階  | 042-655-6665 | <a href="https://ls.kitaharahosp.com/">https://ls.kitaharahosp.com/</a>                                                       |                    | ○                  | 脳神経外科<br>総合診療科<br>小児科<br>神経内科<br>消化器外科<br>心臓血管外科<br>精神科<br>整形外科 | 各診療科担当医                                                     |                                                                  |
| 1671 | 医療法人社団青雲会<br>北野台病院                | 192-0911 | 東京都八王子市打越町1068番地                  | 042-637-1001 | <a href="http://www.kitanodai.jp/">http://www.kitanodai.jp/</a>                                                               |                    | ○                  | 精神科                                                             | 市川 曾根<br>荻 川本<br>加茂 大谷                                      |                                                                  |
| 1672 | 医療法人社団清仙会<br>松本クリニック              | 193-0835 | 東京都八王子市千人町2-20-2クローバービル3階<br>303  | 042-673-4366 | <a href="http://www.seisenkai.or.jp/">http://www.seisenkai.or.jp/</a>                                                         | ○                  | ○                  | 内科<br>整形外科<br>精神科                                               | 松本清彦他                                                       | ほりごめクリニック（八王子市千人町2-20-2-301）                                     |
| 1673 | 医療法人社団斗南堂<br>八王子クリニック             | 192-0081 | 東京都八王子市横山町11-5斗南堂ビル               | 042-643-3717 | <a href="https://hachicli.or.jp/outpatient/hachicli.html">https://hachicli.or.jp/outpatient/hachicli.html</a>                 | ○                  | ○                  | 内科<br>肛門科<br>皮膚科                                                | 井藤 尚文<br>高橋 克之                                              | 東京医科大学八王子医療センター（東京都八王子市館町1163）<br>東海大学医学部付属八王子病院（東京都八王子市石川町1838） |
| 1674 | 医療法人社団斗南堂<br>八王子クリニック             | 192-0065 | 東京都八王子市新町7-10シルバーヒルズ八王子<br>1F, 2F | 042-643-1321 | <a href="https://hachicli.or.jp/outpatient/hachicli-shincho.html">https://hachicli.or.jp/outpatient/hachicli-shincho.html</a> | ○                  | ○                  | 内科<br>脳神経内科<br>循環器内科                                            | 新井 謙<br>中村 高浩<br>瀬戸口 雅彦                                     | 東京医科大学八王子医療センター（東京都八王子市館町1163）<br>東海大学医学部付属八王子病院（東京都八王子市石川町1838） |

電話や情報通信機器を用いて診療を実施する医療機関の一覧（東京都）

|      | 基本情報                       |          |                             |              |                                                                                       | 事務連絡に基づく対応について     |                    |             |                                  |                                              |
|------|----------------------------|----------|-----------------------------|--------------|---------------------------------------------------------------------------------------|--------------------|--------------------|-------------|----------------------------------|----------------------------------------------|
|      | 施設名                        | 郵便番号     | 住所（都道府県から記載）                | 電話番号         | ウェブサイトURL                                                                             | 初診の電話等を用いた診療の実施の有無 | 再診の電話等を用いた診療の実施の有無 | 対応診療科       | 担当医師名                            | 対面診療が必要と判断した場合に連携する医療機関名（複数ある場合は複数、住所も併せて記載） |
| 1675 | 医療法人社団ニューロアソシエイツ長池脳神経内科    | 192-0363 | 東京都八王子市別所1-75-3             | 042-678-7360 | <a href="https://neuroassociates.jp">https://neuroassociates.jp</a>                   |                    | ○                  | 脳神経内科       | 丹羽 直樹                            |                                              |
| 1676 | 医療法人社団八王子中央診療所             | 192-0053 | 東京都八王子市八幡町5-11              | 042-626-5591 |                                                                                       | ○                  | ○                  | 内科<br>小児科   | 山田 真                             |                                              |
| 1677 | 医療法人社団 朋樹会 御殿山クリニック        | 192-0375 | 東京都八王子市鎌水428番地160           | 042-677-1500 | <a href="http://www.gotenyama-cl.com/">http://www.gotenyama-cl.com/</a>               |                    | ○                  | 内科          | 工藤 樹彦                            |                                              |
| 1678 | 医療法人社団 明和会 キタクリニック         | 192-0046 | 東京都八王子市明神町3-22-10 守屋ビル3F    | 042-645-9000 | <a href="http://www.ims-site.jp/kita_clinic/">http://www.ims-site.jp/kita_clinic/</a> |                    | ○                  | 精神科<br>心療内科 | 高橋                               |                                              |
| 1679 | 医療法人社団明和会 こころのクリニック イムス八王子 | 192-0082 | 東京都八王子市東町1-10 グランデハイツ八王子101 | 042-649-8221 | <a href="https://www.ims.gr.jp/kokocli8/">https://www.ims.gr.jp/kokocli8/</a>         |                    | ○                  | 精神科<br>心療内科 | 山田 西元<br>星加 青木                   |                                              |
| 1680 | 医療法人社団 明和会 西八王子病院          | 192-0151 | 東京都八王子市上川町2150番地            | 042-654-4551 | <a href="http://www.ims.gr.jp/nishihachi-hp/">http://www.ims.gr.jp/nishihachi-hp/</a> |                    | ○                  | 精神科         | 三根<br>高島<br>水尾<br>平木<br>宮坂<br>西元 |                                              |
| 1681 | 医療法人社団めぐみ会 南大沢メディカルプラザ     | 192-0364 | 東京都八王子市南大沢2-25 階 フォレストモール3  | 042-670-2460 | <a href="https://www.m-medicalplaza.com/">https://www.m-medicalplaza.com/</a>         |                    | ○                  | 内科          |                                  |                                              |
| 1682 | 医療法人社団めぐみ会 南大沢メディカルプラザ 2   | 192-0364 | 東京都八王子市南大沢2-25 階 フォレストモール2  | 042-670-5922 | <a href="https://www.m-medicalplaza.com/mp2/">https://www.m-medicalplaza.com/mp2/</a> |                    | ○<br>電話のみ（条件付き）    | 整形外科<br>小児科 | 全医師                              |                                              |
| 1683 | 医療法人隆雅会伊藤内科 消化器医院          | 192-0045 | 東京都八王子市大和田町4-15-14          | 042-642-6734 | <a href="https://www.ito-iin.jp/">https://www.ito-iin.jp/</a>                         |                    | ○                  | 内科          | 伊藤 均                             |                                              |

電話や情報通信機器を用いて診療を実施する医療機関の一覧（東京都）

|      | 基本情報        |          |                            |              |                             | 事務連絡に基づく対応について     |                    |                     |                |                                                                  |
|------|-------------|----------|----------------------------|--------------|-----------------------------|--------------------|--------------------|---------------------|----------------|------------------------------------------------------------------|
|      | 施設名         | 郵便番号     | 住所（都道府県から記載）               | 電話番号         | ウェブサイトURL                   | 初診の電話等を用いた診療の実施の有無 | 再診の電話等を用いた診療の実施の有無 | 対応診療科               | 担当医師名          | 対面診療が必要と判断した場合に連携する医療機関名（複数ある場合は複数、住所も併せて記載）                     |
| 1684 | 岩本脳神経クリニック  | 192-0911 | 東京都八王子市打越町1197-1はけしたビルF棟4階 | 03-3923-5515 | 042-632-5585                |                    | ○                  | 脳神経外科<br>神経内科<br>内科 | 岩本邦憲           | 対面診療不可                                                           |
| 1685 | 永生クリニック     | 193-0942 | 東京都八王子市櫛田町588-17           | 042-661-7780 | eisei.or.jp                 |                    | ○                  | 内科                  | 金子 弥樹          |                                                                  |
| 1686 | 大島医院        | 192-0904 | 東京都八王子市子安町3-5-9            | 042-642-1932 |                             | ○                  | ○                  | 内科<br>小児科           | 大島一太           | 東京医大八王子医療センター・東海大学八王子病院                                          |
| 1687 | 加藤醫院        | 192-0919 | 東京都八王子市七国4-9-3             | 042-632-7950 | http://www.katoiin.com/     | ○                  | ○                  | 小児科 内科<br>アレルギー科    | 加藤 直樹<br>齊木 裕香 |                                                                  |
| 1688 | かとう耳鼻科クリニック | 192-0045 | 東京都八王子市大和田町5-13-15         | 042-642-7744 |                             |                    | ○                  | 耳鼻咽喉科               | 加藤 晴弘          | 東海大学医学部付属八王子病院（東京都八王子市石川町1838）<br>東京医科大学八王子医療センター（東京都八王子市館町1163） |
| 1689 | 金子内科クリニック   | 192-0083 | 東京都八王子市旭町6-6<br>ピオスビル4階    | 042-621-5240 |                             |                    | ○                  | 内科                  | 金子 健蔵          |                                                                  |
| 1690 | 亀谷診療所       | 192-0362 | 東京都八王子市松木48-10 グランドウール1階   | 042-689-5959 |                             |                    | ○                  | 内科                  | 亀谷 学           |                                                                  |
| 1691 | かわだ眼科       | 192-0364 | 東京都八王子市南大沢2-2パオレビル5階       | 042-689-6037 | kawada-ganka.jp/            |                    | ○                  | 眼科                  | 河田英一郎          |                                                                  |
| 1692 | 北野小児科       | 192-0906 | 東京都八王子市北野町545-3北野タウンビル6階   | 042-645-8715 | http://kitasyou.starfree.jp | ○                  | ○                  | 小児科<br>内科           | 廣田保蔵           | 北野小児科                                                            |

電話や情報通信機器を用いて診療を実施する医療機関の一覧（東京都）

|      | 基本情報          |           |                            |               |                                                                                                 | 事務連絡に基づく対応について     |                    |             |                                                                |                                                                                             |
|------|---------------|-----------|----------------------------|---------------|-------------------------------------------------------------------------------------------------|--------------------|--------------------|-------------|----------------------------------------------------------------|---------------------------------------------------------------------------------------------|
|      | 施設名           | 郵便番号      | 住所（都道府県から記載）               | 電話番号          | ウェブサイトURL                                                                                       | 初診の電話等を用いた診療の実施の有無 | 再診の電話等を用いた診療の実施の有無 | 対応診療科       | 担当医師名                                                          | 対面診療が必要と判断した場合に連携する医療機関名（複数ある場合は複数、住所も併せて記載）                                                |
| 1693 | クリニックゼロ       | 193-0943  | 東京都八王子市寺田町490              | 042-666-1556  | <a href="https://www.eisei.or.jp/">https://www.eisei.or.jp/</a>                                 |                    | ○                  | 内科          | 石塚 英夫                                                          |                                                                                             |
| 1694 | 小松整形外科        | 192-0045  | 東京都八王子市大和田町5-30-28         | 042-642-4017  |                                                                                                 |                    | ○                  | 整形外科、内科     | 小松 隆                                                           |                                                                                             |
| 1695 | 小宮メディカルクリニック  | 192-0031  | 東京都八王子市小宮町1165-2東亜建設第3ビル1階 | 042-639-0666  | <a href="http://www.komiya-mc.com">http://www.komiya-mc.com</a>                                 |                    | ○                  | 内科          | 牛川憲司                                                           |                                                                                             |
| 1696 | 坂本クリニック       | 193-0836  | 東京都八王子市日吉町4-20             | 042-622-2601  | <a href="http://www.sakamoto-clinic.net">www.sakamoto-clinic.net</a>                            | ○                  | ○                  | 内科<br>小児科外科 | 坂本直隆<br>宮園光                                                    | 東京医科大学八王子医療センター（東京都八王子市館町1163）<br>南多摩病院（東京都八王子市散田町3-10-1）                                   |
| 1697 | ささき医院         | 192-0352  | 東京都八王子市大塚496               | 090-1439-7766 | <a href="http://minamosawa.xsrv.jp/">http://minamosawa.xsrv.jp/</a>                             | ○                  | ○                  | 内科<br>小児科   | 佐々木 哲三                                                         | ささき医院（東京都八王子市大塚496）、南大沢クリニック（東京都八王子市南大沢5-14-4-1）                                            |
| 1698 | 三愛病院          | 192-0005  | 東京都八王子市宮下町377番地            | 042-691-4111  | <a href="http://www.sanai-hosp.jp/">http://www.sanai-hosp.jp/</a>                               |                    | ○                  | 内科          | 各医師                                                            |                                                                                             |
| 1699 | 島田療育センターはちおうじ | 193-0931  | 東京都八王子市台町4丁目33番地の13        | 042-634-8511  | <a href="https://www.shimada-ryoiku.or.jp/shima8/">https://www.shimada-ryoiku.or.jp/shima8/</a> |                    | ○                  | 療育<br>小児科   | 小沢浩<br>小沢愉理<br>河野千佳<br>井之上寿美<br>河野芳美<br>塩田睦記<br>中村由紀子<br>松岡雄一郎 |                                                                                             |
| 1700 | しんや内科         | 1:93-0835 | 東京都八王子市千人町4丁目13-2          | 042-673-3033  | <a href="https://www.shinya-naika.com">https://www.shinya-naika.com</a>                         |                    | ○                  | 内科          | 新谷 英滋                                                          | 南多摩病院（東京都八王子市散田町3-10-1）<br>東海大学医学部付属八王子病院（東京都八王子市石川町1838）<br>東京医科大学八王子医療センター（東京都八王子市館町1163） |
| 1701 | 仁和会総合病院       | 192-0046  | 東京都八王子市明神町4-8-1            | 042-644-3711  | <a href="http://www.jinwakai.jp/">http://www.jinwakai.jp/</a>                                   |                    | ○                  | 全科          | 全科                                                             |                                                                                             |

電話や情報通信機器を用いて診療を実施する医療機関の一覧（東京都）

|      | 基本情報          |          |                          |              |                                                                                         | 事務連絡に基づく対応について     |                    |             |              |                                                            |
|------|---------------|----------|--------------------------|--------------|-----------------------------------------------------------------------------------------|--------------------|--------------------|-------------|--------------|------------------------------------------------------------|
|      | 施設名           | 郵便番号     | 住所（都道府県から記載）             | 電話番号         | ウェブサイトURL                                                                               | 初診の電話等を用いた診療の実施の有無 | 再診の電話等を用いた診療の実施の有無 | 対応診療科       | 担当医師名        | 対面診療が必要と判断した場合に連携する医療機関名（複数ある場合は複数、住所も併せて記載）               |
| 1702 | 菅原脳神経外科クリニック  | 192-0903 | 東京都八王子市万町175-1 D棟        | 042-622-3000 | <a href="https://sugawaraclinic.jp/">https://sugawaraclinic.jp/</a>                     | ○                  | ○                  | 内科<br>脳神経外科 | 菅原道仁<br>伊藤たえ |                                                            |
| 1703 | スマイルこどもクリニック  | 193-0832 | 東京都八王子市散田町5-4-20         | 042-661-5529 | <a href="https://smile-child-jesus.com">https://smile-child-jesus.com</a>               | ○                  | ○                  | 小児科         | 三輪久美子        |                                                            |
| 1704 | 田島医院          | 192-0023 | 東京都八王子市久保山町2-43-2        | 042-691-7550 | 作成中                                                                                     | ○                  | ○                  | 内科・整形外科     | 窪田信行         |                                                            |
| 1705 | 田中医院          | 193-0942 | 東京都八王子市櫛田町249-1          | 042-665-0221 |                                                                                         | ○                  | ○                  | 内科<br>神経内科  | 田中伸幸<br>田中幸男 |                                                            |
| 1706 | 田中内科医院        | 192-0046 | 東京都八王子市明神町2-11-1         | 042-645-6144 |                                                                                         | ○                  | ○                  | 内科          | 田中 浩三        | 東京医科大学八王子医療センター（八王子市館町1163）<br>東海大学医学部付属八王子病院（八王子市石川町1838） |
| 1707 | 知野整形外科医院      | 192-0081 | 東京都八王子市横山町20-15ノモス八王子101 | 042-643-0073 | <a href="http://www014.upp.sonet.ne.jp/chino/">http://www014.upp.sonet.ne.jp/chino/</a> |                    | ○                  | 整形外科        | 知野 公明        | 南多摩病院                                                      |
| 1708 | 辻野クリニック       | 193-0832 | 東京都八王子市散田町3-8-24茂和4階     | 042-666-7064 | <a href="https://www.hospita.jp/detail/86/">https://www.hospita.jp/detail/86/</a>       |                    | ○                  | 泌尿器科        | 辻野 進         | なし                                                         |
| 1709 | てんじん内科外科クリニック | 193-0934 | 東京都八王子市小比企480-1          | 042-632-8751 | <a href="http://www.tenjinn-clinic.jp">http://www.tenjinn-clinic.jp</a>                 |                    | ○                  | 内科外科        | 天神 敏博        |                                                            |
| 1710 | 中濱クリニック       | 192-0375 | 東京都八王子市鎌水2-175-9         | 042-676-1234 | <a href="https://www.nakahama-clinic.com/">https://www.nakahama-clinic.com/</a>         | ○                  | ○                  | 内科<br>小児科   | 中濱 昌夫        |                                                            |

電話や情報通信機器を用いて診療を実施する医療機関の一覧（東京都）

|      | 基本情報          |          |                       |              |                                                                                                                                                                                                                                                                                                           | 事務連絡に基づく対応について     |                    |                                  |                                              |                                              |
|------|---------------|----------|-----------------------|--------------|-----------------------------------------------------------------------------------------------------------------------------------------------------------------------------------------------------------------------------------------------------------------------------------------------------------|--------------------|--------------------|----------------------------------|----------------------------------------------|----------------------------------------------|
|      | 施設名           | 郵便番号     | 住所（都道府県から記載）          | 電話番号         | ウェブサイトURL                                                                                                                                                                                                                                                                                                 | 初診の電話等を用いた診療の実施の有無 | 再診の電話等を用いた診療の実施の有無 | 対応診療科                            | 担当医師名                                        | 対面診療が必要と判断した場合に連携する医療機関名（複数ある場合は複数、住所も併せて記載） |
| 1711 | ながふさ共立診療所     | 193-0824 | 東京都八王子市長房町1462-5      | 042-664-1005 | <a href="http://kita.kyoritsu-clinic.jp">http://kita.kyoritsu-clinic.jp</a>                                                                                                                                                                                                                               |                    | ○                  | 内科<br>小児科<br>整形外科                | 松田文子<br>高柳 新<br>井出勝久<br>安達美菜<br>寺田 穂<br>西川洋平 |                                              |
| 1712 | 西てらかた医院       | 192-0153 | 東京都八王子市西寺方町383-1      | 042-650-5055 | <a href="http://www.zuishoukai.or.jp/nishiterakata/?gclid=Cj0KCQjws_rOBRCwARIsAMxfDRh7KoHh0uX6kHC5Qq35u9F1wPWvQ3ao0eDE_sBtsUKAyatS9up4XxMaAseEEALw_wcB">http://www.zuishoukai.or.jp/nishiterakata/?gclid=Cj0KCQjws_rOBRCwARIsAMxfDRh7KoHh0uX6kHC5Qq35u9F1wPWvQ3ao0eDE_sBtsUKAyatS9up4XxMaAseEEALw_wcB</a> | ○                  | ○                  | 内科<br>整形外科<br>眼科                 | 向井田 智之                                       |                                              |
| 1713 | 貳番街メディカルクリニック | 192-0373 | 東京都八王子市上柚木3-6-1       | 042-670-7288 | <a href="http://www.2ndamc.or.jp">http://www.2ndamc.or.jp</a>                                                                                                                                                                                                                                             | ○                  | ○                  | 内科<br>外科<br>小児科<br>整形外科          | 板岡 俊成                                        | 貳番街メディカルクリニック（東京都八王子市上柚木3-6-1）               |
| 1714 | 沼沢医院          | 192-0904 | 東京都八王子市子安町4-20-9      | 042-622-2369 |                                                                                                                                                                                                                                                                                                           |                    | ○                  | 内科                               | 沼沢 良樹                                        |                                              |
| 1715 | 八王子山王病院       | 192-0042 | 東京都八王子市中野山王2-15-16    | 042-626-1144 | <a href="https://hachioji-sannou.or.jp/">https://hachioji-sannou.or.jp/</a>                                                                                                                                                                                                                               |                    | ○                  | 標榜科全て                            | 各担当医                                         |                                              |
| 1716 | 八王子消化器病院      | 192-0903 | 東京都八王子市万町177-3        | 042-626-5111 | <a href="http://www.hachiojisyokaki.com/">http://www.hachiojisyokaki.com/</a>                                                                                                                                                                                                                             |                    | ○                  | 消化器内科<br>消化器外科<br>糖尿病内科<br>リウマチ科 | 小池 伸定                                        |                                              |
| 1717 | 八王子糖尿病内科クリニック | 192-0083 | 東京都八王子市旭町11-5 CP6ビル3F | 042-631-1024 | <a href="http://hachioji-dm.com">http://hachioji-dm.com</a>                                                                                                                                                                                                                                               |                    | ○                  | 糖尿病内科                            | 山本 直之                                        |                                              |
| 1718 | 原内科医院         | 193-0931 | 東京都八王子市台町2-22-7-102   | 042-625-7133 |                                                                                                                                                                                                                                                                                                           |                    | ○                  | 内科                               | 原 歩                                          | 東京医大八王子医療センター（東京都八王子市館町1163）                 |
| 1719 | 福原内科クリニック     | 192-0071 | 東京都八王子市八日町4-16        | 042-623-3238 | <a href="https://www.fukuhara-naika.com/">https://www.fukuhara-naika.com/</a>                                                                                                                                                                                                                             | ○                  | ○                  | 内科<br>小児科                        | 今西 亮                                         |                                              |

電話や情報通信機器を用いて診療を実施する医療機関の一覧（東京都）

|      | 基本情報             |          |                                   |              |                                                                                   | 事務連絡に基づく対応について     |                    |                                        |                                                               |                                                                                             |
|------|------------------|----------|-----------------------------------|--------------|-----------------------------------------------------------------------------------|--------------------|--------------------|----------------------------------------|---------------------------------------------------------------|---------------------------------------------------------------------------------------------|
|      | 施設名              | 郵便番号     | 住所（都道府県から記載）                      | 電話番号         | ウェブサイトURL                                                                         | 初診の電話等を用いた診療の実施の有無 | 再診の電話等を用いた診療の実施の有無 | 対応診療科                                  | 担当医師名                                                         | 対面診療が必要と判断した場合に連携する医療機関名（複数ある場合は複数、住所も併せて記載）                                                |
| 1720 | 富士森内科クリニック       | 193-0931 | 東京都八王子市台町2-14-20                  | 042-621-0300 | <a href="http://www.fujimori.sms.gr.jp/">http://www.fujimori.sms.gr.jp/</a>       | ○                  | ○                  | 内科<br>消化器内科<br>内視鏡内科<br>循環器内科<br>リウマチ科 | 清川重人<br>清川智史<br>清川博史<br>高嶋志在<br>小笠原倫大<br>服部伸洋<br>坂本直人<br>山崎隼人 | 南多摩病院（東京都八王子市散田町3-10-1）<br>東海大学医学部附属八王子病院（東京都八王子市石川町1838）<br>東京医科大学八王子医療センター（東京都八王子市館町1163） |
| 1721 | 富士森内科みなみのクリニック   | 192-0917 | 東京都八王子市西片倉3-1-21第1みなみ野クリニックセンター2F | 042-635-6711 | <a href="http://fujimori-minamino.com">http://fujimori-minamino.com</a>           | ○                  | ○                  | 内科                                     | 高嶋志在<br>清川重人<br>箕輪健太郎                                         |                                                                                             |
| 1722 | ふれあいつつじヶ丘診療所     | 193-0823 | 東京都八王子市横川町668-69                  | 042-626-0311 |                                                                                   |                    | ○                  | 内科                                     | 原 政晴                                                          |                                                                                             |
| 1723 | ほりごめクリニック        | 193-0835 | 東京都八王子市千人町2-20-2クローバービル3階301      | 042-673-7004 |                                                                                   | ○                  | ○                  | 内科                                     | 堀米政利他                                                         | 医療法人社団清仙会松本（八王子市千人町2-20-2-303）                                                              |
| 1724 | まつもと小児アレルギークリニック | 192-0364 | 東京都八王子市南大沢2 パオレ5F                 | 042-679-6051 | <a href="http://ssc2.doctorqube.com/mac/c/">http://ssc2.doctorqube.com/mac/c/</a> |                    | ○                  | 小児科<br>アレルギー科                          | 松本勉                                                           | 東海大学医学部附属八王子病院<br>東京医科大学八王子医療センター<br>日本医科大学多摩永山病院<br>多摩南部地域病院                               |
| 1725 | 真宮病院             | 192-0075 | 東京都八王子市南新町23                      | 042-625-0648 | <a href="http://www.mamiya-hp.jp/">http://www.mamiya-hp.jp/</a>                   |                    | ○                  | 内科<br>整形外科                             | 真宮一<br>浜野昭彦                                                   |                                                                                             |
| 1726 | 右田病院             | 192-0043 | 東京都八王子市暁町1丁目48番18号                | 042-622-5155 | <a href="http://www.migitahosp.or.jp/">http://www.migitahosp.or.jp/</a>           |                    | ○                  | 外科<br>乳腺外科<br>整形外科<br>内科               | 右田 隆之<br>鴨 宣之<br>森島 満<br>蒔苗 永                                 |                                                                                             |
| 1727 | みなみ野眼科クリニック      | 192-0917 | 東京都八王子市西片倉3-1-21 サザンクロス2-2        | 042-632-5888 | <a href="https://www.minamino-cc.com/">https://www.minamino-cc.com/</a>           |                    | ○                  | 眼科                                     | 藤田 哲                                                          |                                                                                             |
| 1728 | みなみ野こどもクリニック     | 192-0917 | 東京都八王子市西片倉3-1-4 第2みなみ野クリニックセンター3階 | 042-637-5151 | <a href="http://minamino-kids.clinic">http://minamino-kids.clinic</a>             | ○                  | ○                  | 小児科<br>アレルギー科                          | 檜垣 博嗣                                                         |                                                                                             |



電話や情報通信機器を用いて診療を実施する医療機関の一覧（東京都）

|      | 基本情報                     |          |                           |              |                                                                                                       | 事務連絡に基づく対応について     |                    |                       |                                  |                                                                                 |
|------|--------------------------|----------|---------------------------|--------------|-------------------------------------------------------------------------------------------------------|--------------------|--------------------|-----------------------|----------------------------------|---------------------------------------------------------------------------------|
|      | 施設名                      | 郵便番号     | 住所（都道府県から記載）              | 電話番号         | ウェブサイトURL                                                                                             | 初診の電話等を用いた診療の実施の有無 | 再診の電話等を用いた診療の実施の有無 | 対応診療科                 | 担当医師名                            | 対面診療が必要と判断した場合に連携する医療機関名（複数ある場合は複数、住所も併せて記載）                                    |
| 1729 | みなみ野循環器病院                | 192-0918 | 東京都八王子市兵衛1-25-1           | 042-637-8101 | <a href="https://mjhospital.tokyo/">https://mjhospital.tokyo/</a>                                     |                    | ○                  | 循環器内科                 | 幡 芳樹                             |                                                                                 |
| 1730 | 山田皮フ科クリニック               | 192-0917 | 東京都八王子市西片倉3-1-21サザンクロス1階  | 042-635-2551 | <a href="http://www.y-hifuka.com/">http://www.y-hifuka.com/</a>                                       |                    | ○                  | 皮膚科                   | 山田 晴義                            |                                                                                 |
| 1731 | よしこ眼科クリニック               | 192-0918 | 東京都八王子市兵衛1-3-1ミクリシティ4階    | 042-632-8008 | <a href="https://www.yoshiko-eye.jp/">https://www.yoshiko-eye.jp/</a>                                 |                    | ○                  | 眼科                    | 赤坂佳子                             |                                                                                 |
| 1732 | 義澤皮膚科内科クリニック             | 192-0914 | 東京都八王子市片倉町342-3 K's片倉ビル2F | 042-697-9923 |                                                                                                       |                    | ○                  | 内科                    | 義澤 成美                            |                                                                                 |
| 1733 | わかばやし内科クリニック             | 192-0051 | 東京都八王子市元本郷町2-5-1          | 042-622-0550 | <a href="https://wakabayashinaika.wixsite.com/clinic">https://wakabayashinaika.wixsite.com/clinic</a> |                    | ○                  | 内科<br>呼吸器内科<br>アレルギー科 | 若林徹                              |                                                                                 |
| 1734 | 医療法人社団幸悠会 内野クリニック        | 190-0012 | 東京都立川市曙町 2丁目34番地6 小杉ビル6階  | 042-521-4139 | <a href="http://www.kouyukai1968.or.jp">http://www.kouyukai1968.or.jp</a>                             |                    | ○                  | 精神科                   | 各医師                              |                                                                                 |
| 1735 | 医療法人社団 敏和会 西砂川病院         | 190-0031 | 東京都立川市砂川町8-2-3            | 042-535-8811 | <a href="http://www.nishisuna-hp.jp/">http://www.nishisuna-hp.jp/</a>                                 |                    | ○                  | 内科<br>耳鼻咽喉科           | 各医師                              | 国家公務員共済組合連合会 立川病院<br>(東京都立川市錦町4-2-22)<br>独立行政法人国立病院機構災害医療センター<br>(東京都立川市緑町3256) |
| 1736 | 医療法人社団 颯由会 今井皮フ形成外科クリニック | 190-0012 | 東京都立川市曙町 2-1-3-3 立川三菱ビル6F | 0120-50-1103 | <a href="https://www.imai-clinic.jp/">https://www.imai-clinic.jp/</a>                                 | ○                  | ○                  | 皮膚科<br>形成外科           | 今井 由典<br>大津 孝枝<br>朝山 祥子<br>山本 佐織 |                                                                                 |
| 1737 | うちだ内科医院                  | 190-0002 | 東京都立川市幸町5-95-4            | 042-535-3974 | <a href="http://www.tamagawa-josui.com/">http://www.tamagawa-josui.com/</a>                           | ○                  | ○                  | 内科<br>小児科<br>皮膚科      | 鎌形 博展                            |                                                                                 |

電話や情報通信機器を用いて診療を実施する医療機関の一覧（東京都）

|      | 基本情報             |          |                                     |              |                                                                                                               | 事務連絡に基づく対応について     |                    |                                   |                                                                      |                                                     |
|------|------------------|----------|-------------------------------------|--------------|---------------------------------------------------------------------------------------------------------------|--------------------|--------------------|-----------------------------------|----------------------------------------------------------------------|-----------------------------------------------------|
|      | 施設名              | 郵便番号     | 住所（都道府県から記載）                        | 電話番号         | ウェブサイトURL                                                                                                     | 初診の電話等を用いた診療の実施の有無 | 再診の電話等を用いた診療の実施の有無 | 対応診療科                             | 担当医師名                                                                | 対面診療が必要と判断した場合に連携する医療機関名（複数ある場合は複数、住所も併せて記載）        |
| 1738 | おおたか脳神経外科・内科     | 190-0004 | 東京都立川市柏町4-56-1 ケーパルビル1FA            | 042-535-1177 | <a href="https://otaka-nouge.com/">https://otaka-nouge.com/</a>                                               |                    | ○                  | 脳神経外科・内科<br>内科                    | 大高 弘稔                                                                | 独立行政法人災害医療センター（東京都立川市緑町3256）<br>立川相互病院（東京都立川市緑町4-1） |
| 1739 | クリニックみらい立川       | 190-0023 | 東京都立川市柴崎町6-19-20<br>メディカル・フォレストたちかわ | 042-525-7550 | <a href="https://www.tama-mirai.com/tachikawa/index.php">https://www.tama-mirai.com/tachikawa/index.php</a>   |                    | ○                  | 内科                                | 金重勝博                                                                 |                                                     |
| 1740 | 立川駅南泌尿器科皮膚科クリニック | 190-0022 | 東京都立川市錦町2-1-33立川南口HMビル3階A号          | 042-548-8802 | <a href="http://www.tachikawa-clinic.jp">http://www.tachikawa-clinic.jp</a>                                   |                    | ○                  | 泌尿器科<br>皮膚科<br>内科                 | 湯澤 政行                                                                |                                                     |
| 1741 | 立川相互病院           | 190-8578 | 東京都立川市緑町4-1                         | 042-525-2585 | <a href="https://www.t-kenseikai.jp/tachisou/">https://www.t-kenseikai.jp/tachisou/</a>                       |                    | ○                  | 産婦人科<br>眼科<br>脳神経外科               | 佐藤 典子<br>長坂 康子<br>張 暁慧<br>池田 麗<br>菅原 知美<br>大久保 俊之<br>安部 友康<br>佐々木 正史 |                                                     |
| 1742 | 立川南口耳鼻咽喉科        | 190-0023 | 東京都立川市柴崎町3-10-5 大雅ビル1階              | 042-540-2917 | <a href="http://tachikawa.sho-jin.com/">http://tachikawa.sho-jin.com/</a>                                     | ○                  | ○                  | 耳鼻科                               | 庄司 育央                                                                |                                                     |
| 1743 | 西立川おとなとこどものクリニック | 190-0013 | 東京都立川市富士見町1-31-18<br>西立川KIビル2F      | 042-521-3333 | <a href="https://nishitachikawa-otona-kodomo.jp/">https://nishitachikawa-otona-kodomo.jp/</a>                 | ○                  | ○                  | 内科                                | 高橋 永子                                                                |                                                     |
| 1744 | まつもとクリニック        | 190-0022 | 東京都立川市錦町2-1-33<br>立川南口HMビル2F        | 042-540-6766 | <a href="https://www.dr-matsumotoclinic.com">https://www.dr-matsumotoclinic.com</a>                           |                    | ○                  | 内科<br>乳腺外科<br>外科<br>消化器内科<br>肛門外科 | 松本 匡浩                                                                |                                                     |
| 1745 | 南眼科              | 190-0012 | 東京都立川市曙町2-13-3 立川三菱ビル5階             | 042-525-4981 | <a href="http://www.minamiganka.jp/">http://www.minamiganka.jp/</a>                                           | ○                  | ○                  | 眼科                                | 南 修一郎                                                                |                                                     |
| 1746 | 吉祥寺もろほし耳鼻咽喉科     | 180-0004 | 東京都武蔵野市吉祥寺本町一丁目7番4号<br>丸二清水ビル3階     | 0422-20-4133 | <a href="http://www.morohosi-jibika.jp/jibika/kichijoji/">http://www.morohosi-jibika.jp/jibika/kichijoji/</a> | ○                  | ○                  | 耳鼻咽喉科<br>アレルギー科                   | 満山知恵子                                                                |                                                     |

電話や情報通信機器を用いて診療を実施する医療機関の一覧（東京都）

|      | 基本情報            |          |                                   |              |                                                                                                                                                                                                                          | 事務連絡に基づく対応について     |                    |                       |       |                                              |
|------|-----------------|----------|-----------------------------------|--------------|--------------------------------------------------------------------------------------------------------------------------------------------------------------------------------------------------------------------------|--------------------|--------------------|-----------------------|-------|----------------------------------------------|
|      | 施設名             | 郵便番号     | 住所（都道府県から記載）                      | 電話番号         | ウェブサイトURL                                                                                                                                                                                                                | 初診の電話等を用いた診療の実施の有無 | 再診の電話等を用いた診療の実施の有無 | 対応診療科                 | 担当医師名 | 対面診療が必要と判断した場合に連携する医療機関名（複数ある場合は複数、住所も併せて記載） |
| 1747 | あべ整形外科クリニック     | 180-0003 | 東京都武蔵野市吉祥寺南町1-6-18<br>ルネ吉祥寺B201-A | 0422-46-7251 | <a href="http://www.abeseikei.com">http://www.abeseikei.com</a>                                                                                                                                                          |                    | ○                  | 整形外科 リウマチ科 リハビリテーション科 | 阿部 康裕 |                                              |
| 1748 | 池下レディースクリニック吉祥寺 | 180-0004 | 東京都武蔵野市吉祥寺本町1-23-1<br>KS23ビル6・7F  | 0422-27-2965 | <a href="http://www.ikeshita-clinic.com/kichijoji">http://www.ikeshita-clinic.com/kichijoji</a>                                                                                                                          |                    | ○                  | 産婦人科                  | 矢野 直美 |                                              |
| 1749 | 石澤敦クリニック        | 180-0004 | 東京都武蔵野市吉祥寺本町1-21-2-206            | 0422-20-0755 | <a href="http://www.ishizawa-clinic.jp/">http://www.ishizawa-clinic.jp/</a>                                                                                                                                              | ○                  | ○                  | 脳神経外科                 | 石澤 敦  |                                              |
| 1750 | いちむら内科クリニック     | 180-0023 | 東京都武蔵野市境南町1-30-16                 | 0422-39-4123 |                                                                                                                                                                                                                          |                    | ○                  | 内科 呼吸器内科 アレルギー科       | 市村 浩一 |                                              |
| 1751 | いるかこどもクリニック     | 180-0021 | 東京都武蔵野市桜堤2-7-27<br>メディシャトル桜堤102号  | 0422-52-1650 | <a href="http://iruka-kodomo.jp/">http://iruka-kodomo.jp/</a>                                                                                                                                                            | ○                  | ○                  | 小児科 アレルギー科            | 佐藤 大  |                                              |
| 1752 | おおやクリニック        | 180-0022 | 東京都武蔵野市境2-8-3                     | 0422-51-3001 | <a href="http://www.clinics.medley.life/clinics/58ef45bdad12b80009a8fdef">http://www.clinics.medley.life/clinics/58ef45bdad12b80009a8fdef</a><br><a href="https://www.ooya-clinic.com/">https://www.ooya-clinic.com/</a> | ○                  | ○                  | 内科 婦人科 小児科            | 田中 正司 |                                              |
| 1753 | かえで内科クリニック      | 180-0003 | 東京都武蔵野市吉祥寺南町2-17-2-102            | 0422-24-7065 |                                                                                                                                                                                                                          |                    | ○                  | 内科                    | 瀬浪 克彦 |                                              |
| 1754 | かたおか医院          | 180-0013 | 東京都武蔵野市西久保3-2-22<br>イノグリーンフォレスト1階 | 0422-50-5311 | <a href="https://www.kataoka-iin.com/">https://www.kataoka-iin.com/</a>                                                                                                                                                  |                    | ○                  | 内科                    | 片岡 直之 |                                              |
| 1755 | かみやま内科クリニック     | 180-0022 | 東京都武蔵野市境1-9-9                     | 0422-60-3188 | <a href="http://www.kamiyama-cl.com">http://www.kamiyama-cl.com</a>                                                                                                                                                      |                    | ○                  | 内科                    | 神山 俊典 |                                              |

電話や情報通信機器を用いて診療を実施する医療機関の一覧（東京都）

|      | 基本情報            |          |                                      |              |                                                                                                                                       | 事務連絡に基づく対応について     |                    |                                      |                         |                                              |
|------|-----------------|----------|--------------------------------------|--------------|---------------------------------------------------------------------------------------------------------------------------------------|--------------------|--------------------|--------------------------------------|-------------------------|----------------------------------------------|
|      | 施設名             | 郵便番号     | 住所（都道府県から記載）                         | 電話番号         | ウェブサイトURL                                                                                                                             | 初診の電話等を用いた診療の実施の有無 | 再診の電話等を用いた診療の実施の有無 | 対応診療科                                | 担当医師名                   | 対面診療が必要と判断した場合に連携する医療機関名（複数ある場合は複数、住所も併せて記載） |
| 1756 | 河原クリニック         | 180-0013 | 東京都武蔵野市西久保2-14-5                     | 0422-55-7500 | <a href="http://www.kawaharaclinic.jp/">http://www.kawaharaclinic.jp/</a>                                                             | ○                  | ○                  | 整形外科・リウマチ科・皮膚科                       | 河原 徹<br>伊藤 算昭<br>水谷 三記子 |                                              |
| 1757 | 北町診療所           | 180-0001 | 東京都武蔵野市吉祥寺北町1-1-3                    | 0422-22-8151 | <a href="http://www.kichijoji-kitamachi-clinic.com">http://www.kichijoji-kitamachi-clinic.com</a>                                     | ○                  | ○                  | 内科                                   | 藤川 恭浩                   |                                              |
| 1758 | 吉祥寺・藤田クリニック     | 180-0003 | 東京都武蔵野市吉祥寺南町1-1-10<br>MAビル7F         | 0422-40-5177 | <a href="http://www.fujita-cl.jp/">http://www.fujita-cl.jp/</a>                                                                       |                    | ○                  | 内科 糖尿病内科<br>循環器内科<br>内分泌 甲状腺内科 腎臓内科  | 藤田 進彦<br>藤田 恵美子         |                                              |
| 1759 | 吉祥寺あさひ病院        | 180-0004 | 東京都武蔵野市吉祥寺本町1-30-12                  | 0422-22-1120 | <a href="https://www.zenjinkai-group.jp/tojinkai/hospital/kichijoji/">https://www.zenjinkai-group.jp/tojinkai/hospital/kichijoji/</a> |                    | ○                  | 腎臓内科 糖尿病内科<br>リウマチ科 循環器内科<br>泌尿器科 内科 | 各担当医師                   |                                              |
| 1760 | 吉祥寺クローバークリニック   | 180-0004 | 東京都武蔵野市吉祥寺本町2-25-7<br>吉祥寺プラザ3階       | 0422-28-7377 | <a href="http://www.kichijoji-clover-clinic.jp">http://www.kichijoji-clover-clinic.jp</a>                                             |                    | ○                  | 精神科                                  | 備瀬 哲弘                   |                                              |
| 1761 | 吉祥寺こころの診療所      | 180-0004 | 東京都武蔵野市吉祥寺本町1-18-2<br>M-9ビル7階        | 0422-27-1282 | <a href="http://www.kj-kokoro.com">http://www.kj-kokoro.com</a>                                                                       |                    | ○                  | 精神科                                  | 那須 一郎                   |                                              |
| 1762 | 吉祥寺榊原クリニック      | 180-0003 | 東京都武蔵野市吉祥寺南町1-8-6<br>カーサカラム吉祥寺2階     | 0422-48-6311 |                                                                                                                                       | ○                  | ○                  | 循環器内科<br>消化器内科 内科                    | 酒井 吉郎<br>春木 京子          |                                              |
| 1763 | 吉祥寺たかのメンタルクリニック | 180-0004 | 東京都武蔵野市吉祥寺本町2-13-4<br>井野ビル301        | 0422-27-1077 | <a href="https://takano-cl.jp">https://takano-cl.jp</a>                                                                               |                    | ○                  | 心療内科 精神科                             | 高野 佳也                   |                                              |
| 1764 | 吉祥寺東方医院         | 180-0002 | 東京都武蔵野市吉祥寺東町1-2-2<br>オリエントプラザ丹野201号室 | 0422-21-7211 |                                                                                                                                       |                    | ○                  | 内科 皮膚科<br>アレルギー科                     | 三浦 於菟                   |                                              |

電話や情報通信機器を用いて診療を実施する医療機関の一覧（東京都）

|      | 基本情報            |          |                                 |              |                                                                                                               | 事務連絡に基づく対応について     |                    |                                                     |                                                    |                                              |
|------|-----------------|----------|---------------------------------|--------------|---------------------------------------------------------------------------------------------------------------|--------------------|--------------------|-----------------------------------------------------|----------------------------------------------------|----------------------------------------------|
|      | 施設名             | 郵便番号     | 住所（都道府県から記載）                    | 電話番号         | ウェブサイトURL                                                                                                     | 初診の電話等を用いた診療の実施の有無 | 再診の電話等を用いた診療の実施の有無 | 対応診療科                                               | 担当医師名                                              | 対面診療が必要と判断した場合に連携する医療機関名（複数ある場合は複数、住所も併せて記載） |
| 1765 | 吉祥寺南病院          | 180-0003 | 東京都武蔵野市吉祥寺南町3-14-4              | 0422-45-2161 | <a href="https://www.kichijoujiminami-hp.jp/">https://www.kichijoujiminami-hp.jp/</a>                         |                    | ○                  | 内科<br>外科<br>整形外科<br>脳神経外科                           | 佐藤 俊一<br>阿南 匡<br>山下 重雄<br>藤井 正道<br>齋藤 良彦<br>高草木 宏之 |                                              |
| 1766 | 吉祥寺南町眼科         | 180-0003 | 東京都武蔵野市吉祥寺南町2-4-12              | 0422-43-0055 |                                                                                                               |                    | ○                  | 眼科                                                  | 瀧川 かおり                                             |                                              |
| 1767 | 吉祥寺メディカルクリニック   | 180-0004 | 東京都武蔵野市吉祥寺本町2-13-4<br>井野ビル202号室 | 0422-23-2820 | <a href="http://www.kichijoji-clinic.com">http://www.kichijoji-clinic.com</a>                                 |                    | ○                  | 内科 消化器内科                                            | 高橋 正彦                                              |                                              |
| 1768 | 吉祥寺レディースクリニック   | 180-0003 | 東京都武蔵野市吉祥寺南町2-6-10<br>富士パームビル5F | 0422-40-1770 | <a href="http://www.kichijoji-ladies.com/">http://www.kichijoji-ladies.com/</a>                               |                    | ○                  | 産婦人科                                                | 成川 希                                               |                                              |
| 1769 | 木下循環器呼吸器内科クリニック | 180-0004 | 東京都武蔵野市吉祥寺本町1-33-6              | 0422-22-8300 | <a href="http://www5a.biglobe.ne.jp/~k-clinic/index.html">http://www5a.biglobe.ne.jp/~k-clinic/index.html</a> |                    | ○                  | 内科 呼吸器内科<br>循環器内科                                   | 木下 陽                                               |                                              |
| 1770 | 甲賀クリニック         | 180-0023 | 東京都武蔵野市境南町3-12-2                | 0422-30-7707 | <a href="http://www.kougaclinic.com">http://www.kougaclinic.com</a>                                           | ○                  | ○                  | 内科 小児科<br>皮膚科 アレルギ科 整形外科<br>リハビリテーション科<br>心療内科 漢方内科 | 甲賀 丈晴                                              |                                              |
| 1771 | ごとう内科・循環器クリニック  | 180-0023 | 東京都武蔵野市境南町2-20-6                | 0422-32-5048 | <a href="http://www.gotou-clinic.jp/">http://www.gotou-clinic.jp/</a>                                         |                    | ○                  | 内科・循環器内科                                            | 後藤 依里                                              |                                              |
| 1772 | 小林眼科医院          | 180-0004 | 東京都武蔵野市吉祥寺本町2-9-1<br>KYビル3F     | 0422-22-3507 |                                                                                                               |                    | ○                  | 眼科                                                  | 小林 康紀                                              |                                              |
| 1773 | 小森病院            | 180-0014 | 東京都武蔵野市関前3-3-15                 | 0422-55-8311 |                                                                                                               | ○（診療録が残っている方のみ）    | ○                  | 内科 小児科                                              |                                                    |                                              |

電話や情報通信機器を用いて診療を実施する医療機関の一覧（東京都）

|      | 基本情報           |          |                                     |              |                                                                                       | 事務連絡に基づく対応について     |                    |                   |        |                                                                          |
|------|----------------|----------|-------------------------------------|--------------|---------------------------------------------------------------------------------------|--------------------|--------------------|-------------------|--------|--------------------------------------------------------------------------|
|      | 施設名            | 郵便番号     | 住所（都道府県から記載）                        | 電話番号         | ウェブサイトURL                                                                             | 初診の電話等を用いた診療の実施の有無 | 再診の電話等を用いた診療の実施の有無 | 対応診療科             | 担当医師名  | 対面診療が必要と判断した場合に連携する医療機関名（複数ある場合は複数、住所も併せて記載）                             |
| 1774 | 境南クリニック        | 180-0023 | 東京都武蔵野市境南町2-7-19<br>境南スカイビル3, 4, 5F | 0422-33-8411 |                                                                                       |                    | ○                  | 内科                | 井上 宙哉  |                                                                          |
| 1775 | 境南耳鼻咽喉科診療所     | 180-0023 | 東京都武蔵野市境南町2-7-13                    | 0422-31-1435 | <a href="http://www.mmkonan.com">http://www.mmkonan.com</a>                           |                    | ○                  | 耳鼻咽喉科             | 長野 澄雄  |                                                                          |
| 1776 | 桜堤ファミリークリニック   | 180-0021 | 東京都武蔵野市桜堤2-8-55                     | 0422-53-1111 | <a href="http://www.sakurazutsumi-clinic.com">http://www.sakurazutsumi-clinic.com</a> | ○                  | ○                  | 内科 外科 消化器内科 内視鏡内科 | 諸井 隆一  |                                                                          |
| 1777 | 佐々木産婦人科        | 180-0022 | 東京都武蔵野市境4-10-8                      | 0422-54-9311 | <a href="http://www.sasakisanfujinka.com">http://www.sasakisanfujinka.com</a>         |                    | ○                  | 産婦人科 内科 小児科       | 佐々木 重胤 |                                                                          |
| 1778 | 椎名医院           | 180-0003 | 東京都武蔵野市吉祥寺南町1-18-6                  | 0422-44-3478 |                                                                                       |                    | ○                  | 精神科 心療内科          | 椎名 健一  |                                                                          |
| 1779 | 耳鼻咽喉科青木クリニック   | 180-0022 | 東京都武蔵野市境2-14-1<br>スイングビル402         | 0422-50-3321 | <a href="http://www.aoki-clinic.com">http://www.aoki-clinic.com</a>                   |                    | ○                  | 耳鼻咽喉科             | 青木 和博  |                                                                          |
| 1780 | 清水眼科           | 180-0022 | 東京都武蔵野市境2-14-1<br>スイング3F            | 0422-55-8377 | <a href="http://www.shimizu.gr.jp/">http://www.shimizu.gr.jp/</a>                     |                    | ○                  | 眼科                | 清水 裕子  |                                                                          |
| 1781 | スイング・ビル野崎クリニック | 180-0022 | 東京都武蔵野市境2-14-1<br>スイング803号          | 0422-36-3534 | <a href="http://www.swing-nozakiclinic.com">http://www.swing-nozakiclinic.com</a>     | ○                  | ○                  | 内科                | 野崎 稔   |                                                                          |
| 1782 | 高橋医院           | 180-0006 | 東京都武蔵野市中町2-13-25                    | 0422-52-3149 |                                                                                       | ○                  | ○                  | 内科 小児科 精神科 外科 婦人科 | 高橋 猛   | 武蔵野赤十字病院（東京都武蔵野市境南町1-26-1）杏林大学病院（東京都三鷹市新川6-20-2）東京医科大学病院（東京都新宿区西新宿6-7-1） |

電話や情報通信機器を用いて診療を実施する医療機関の一覧（東京都）

|      | 基本情報          |          |                                           |               |                                                                                                                 | 事務連絡に基づく対応について     |                    |                   |        |                                              |
|------|---------------|----------|-------------------------------------------|---------------|-----------------------------------------------------------------------------------------------------------------|--------------------|--------------------|-------------------|--------|----------------------------------------------|
|      | 施設名           | 郵便番号     | 住所（都道府県から記載）                              | 電話番号          | ウェブサイトURL                                                                                                       | 初診の電話等を用いた診療の実施の有無 | 再診の電話等を用いた診療の実施の有無 | 対応診療科             | 担当医師名  | 対面診療が必要と判断した場合に連携する医療機関名（複数ある場合は複数、住所も併せて記載） |
| 1783 | たけうち診療所       | 180-0006 | 東京都武蔵野市中町1-10-6<br>三鷹北口共同ビル202            | 050-3161-2876 | <a href="http://www.cabinet-takeuchi.org">http://www.cabinet-takeuchi.org</a>                                   |                    | ○                  | 精神科               | 竹内 光夫  |                                              |
| 1784 | 武居小児科医院       | 180-0023 | 東京都武蔵野市境南町2-8-17-2F                       | 0422-32-4152  |                                                                                                                 |                    | ○ 但し慢性疾患のみ         | 小児科               | 武居 正郎  |                                              |
| 1785 | タワーズ内科クリニック   | 180-0006 | 東京都武蔵野市中町1-12-10<br>武蔵野タワーズスカイゲートタワー5F・B号 | 0422-50-1331  | <a href="http://www.musashino-towers-clm.com/internal.htm">http://www.musashino-towers-clm.com/internal.htm</a> |                    | ○                  | 内科                | 西村 徹   |                                              |
| 1786 | 時計台メディカルクリニック | 180-0004 | 東京都武蔵野市吉祥寺本町3-10-14                       | 0422-20-1151  | <a href="http://www.ichikawa.org">http://www.ichikawa.org</a>                                                   |                    | ○                  | 内科 外科<br>消化器内科    | 市川 直哉  |                                              |
| 1787 | 友利院           | 180-0014 | 東京都武蔵野市関前2-5-14                           | 0422-51-7365  |                                                                                                                 | ○                  | ○                  | 内科 小児科<br>外科 胃腸内科 | 友利 千之  |                                              |
| 1788 | 内科 いしだクリニック   | 180-0006 | 東京都武蔵野市中町1-17-2<br>ステラ武蔵野2F               | 0422-53-1115  |                                                                                                                 |                    | ○                  | 内科                | 石田 雄二  |                                              |
| 1789 | 長沼整形外科・内科医院   | 180-0022 | 東京都武蔵野市境2-13-6                            | 0422-59-1300  | <a href="http://www.naganuma-clinic.jp/">http://www.naganuma-clinic.jp/</a>                                     |                    | ○                  | 整形外科 内科           | 長沼 浩二  |                                              |
| 1790 | 中田内科クリニック     | 180-0001 | 東京都武蔵野市吉祥寺北町2-1-14                        | 0422-28-4600  |                                                                                                                 |                    | ○                  | 内科                | 中田 哲也  |                                              |
| 1791 | 中町内科医院        | 180-0006 | 東京都武蔵野市中町2-31-12<br>メゾンドマーティール1階          | 0422-55-1203  |                                                                                                                 | ○                  | ○                  | 内科                | 久木田 雅弘 |                                              |

電話や情報通信機器を用いて診療を実施する医療機関の一覧（東京都）

|      | 基本情報         |          |                                     |              |                                                                                                   | 事務連絡に基づく対応について     |                    |                                |                 |                                              |
|------|--------------|----------|-------------------------------------|--------------|---------------------------------------------------------------------------------------------------|--------------------|--------------------|--------------------------------|-----------------|----------------------------------------------|
|      | 施設名          | 郵便番号     | 住所（都道府県から記載）                        | 電話番号         | ウェブサイトURL                                                                                         | 初診の電話等を用いた診療の実施の有無 | 再診の電話等を用いた診療の実施の有無 | 対応診療科                          | 担当医師名           | 対面診療が必要と判断した場合に連携する医療機関名（複数ある場合は複数、住所も併せて記載） |
| 1792 | 野の花メンタルクリニック | 180-0004 | 東京都武蔵野市吉祥寺本町1-21-2<br>グローリオ吉祥寺本町203 | 0422-28-1587 | <a href="https://www.br4.fiberbit.net/nonohana0452">https://www.br4.fiberbit.net/nonohana0452</a> |                    | ○                  | 精神科 心療内科                       | 野田 恭平           |                                              |
| 1793 | 長谷川小児科医院     | 180-0001 | 東京都武蔵野市吉祥寺北町2-8-5                   | 0422-22-6804 |                                                                                                   | ○                  | ○                  | 小児科                            | 長谷川 正子<br>長谷川 慶 |                                              |
| 1794 | はせがわ内科       | 180-0022 | 東京都武蔵野市境4-4-1                       | 0422-53-0001 |                                                                                                   |                    | ○                  | 内科 小児科                         | 長谷川 ひとみ         |                                              |
| 1795 | 春木医院         | 180-0022 | 東京都武蔵野市境1-5-4                       | 0422-51-4567 |                                                                                                   |                    | ○                  | 内科 小児科<br>東洋医学 糖尿病内科           | 春木 武徳           |                                              |
| 1796 | ひぐち眼科        | 180-0004 | 東京都武蔵野市吉祥寺本町1-8-3<br>ダイヤガイヤビル4F     | 0422-23-8552 | <a href="http://www.higuchiganka.com">http://www.higuchiganka.com</a>                             |                    | ○                  | 眼科                             | 樋口 裕彦           |                                              |
| 1797 | 樋口クリニック      | 180-0006 | 東京都武蔵野市中町1-13-1<br>駅前田辺ビル2F         | 0422-56-3588 |                                                                                                   |                    | ○                  | 精神科 心療内科<br>内科 皮膚科             | 樋口 祥一           |                                              |
| 1798 | 富士見台医院       | 180-0023 | 東京都武蔵野市境南町5-11-2                    | 0422-31-8050 |                                                                                                   |                    | ○                  | 内科                             | 八島 理            |                                              |
| 1799 | 前澤クリニック      | 180-0023 | 東京都武蔵野市境南町3-15-21                   | 0422-30-2861 | <a href="https://maezawa-clinic.jp/">https://maezawa-clinic.jp/</a>                               |                    | ○                  | 内科 小児科                         | 前澤 良彦<br>前澤 浩美  |                                              |
| 1800 | 松井クリニック      | 180-0002 | 東京都武蔵野市吉祥寺東町2-17-27                 | 0422-20-1001 | <a href="http://www.matsui-clinic.org">http://www.matsui-clinic.org</a>                           |                    | ○                  | 内科 胃腸内科<br>アレルギー科<br>リウマチ科 小児科 | 松井 秀樹           |                                              |



電話や情報通信機器を用いて診療を実施する医療機関の一覧（東京都）

|      | 基本情報            |          |                                                              |              |                                                                                           | 事務連絡に基づく対応について     |                    |                                      |                 |                                              |
|------|-----------------|----------|--------------------------------------------------------------|--------------|-------------------------------------------------------------------------------------------|--------------------|--------------------|--------------------------------------|-----------------|----------------------------------------------|
|      | 施設名             | 郵便番号     | 住所（都道府県から記載）                                                 | 電話番号         | ウェブサイトURL                                                                                 | 初診の電話等を用いた診療の実施の有無 | 再診の電話等を用いた診療の実施の有無 | 対応診療科                                | 担当医師名           | 対面診療が必要と判断した場合に連携する医療機関名（複数ある場合は複数、住所も併せて記載） |
| 1801 | 松本医院            | 180-0002 | 東京都武蔵野市吉祥寺東町1-23-3                                           | 0422-22-5755 |                                                                                           |                    | ○                  | 内科 小児科                               | 三室 知子           |                                              |
| 1802 | まつもとファミリークリニック  | 180-0023 | 東京都武蔵野市境南町2-9-3<br>大矢ビル2F                                    | 0422-39-5315 | <a href="http://www.m-family-clinic.com">http://www.m-family-clinic.com</a>               |                    | ○                  | 内科 消化器内<br>科 外科                      | 松本 春美           |                                              |
| 1803 | 美夏クリニック         | 180-0004 | 東京都武蔵野市吉祥寺本町1-8-3<br>三松ビル5F                                  | 0422-28-2033 | <a href="http://www.mika-clinic.com">http://www.mika-clinic.com</a>                       |                    | ○                  | 皮膚科 形成外<br>科 内科                      | 石井 美夏           |                                              |
| 1804 | 三鷹もろほし耳鼻咽喉科     | 180-0006 | 東京都武蔵野市中町一丁目12番10号武蔵野タ<br>ワーズ<br>スカイゲートタワー・タワーズモール内5階・C<br>号 | 0422-37-3341 | <a href="http://www.morohosi-jibika.jp/mitaka/">http://www.morohosi-jibika.jp/mitaka/</a> | ○                  | ○                  | 耳鼻咽喉科<br>アレルギー科                      | 星川治子            |                                              |
| 1805 | みどり町眼科          | 180-0012 | 東京都武蔵野市緑町1-12-14<br>よつわビル1F                                  | 0422-56-8201 | <a href="http://www.midoricho.sakura.ne.jp">http://www.midoricho.sakura.ne.jp</a>         |                    | ○                  | 眼科                                   | 伊藤 寿賀子          |                                              |
| 1806 | 武蔵境皮膚科クリニック     | 180-0022 | 東京都武蔵野市境1-3-1<br>ネオック中央ビル2F                                  | 0422-56-0121 |                                                                                           |                    | ○                  | 皮膚科                                  | 羽田 啓次           |                                              |
| 1807 | 武蔵境眼科医院         | 180-0023 | 東京都武蔵野市境南町1-8-1<br>武蔵野STビル2F                                 | 0422-34-2117 |                                                                                           |                    | ○                  | 眼科                                   | 村松 隆次           |                                              |
| 1808 | 武蔵境病院           | 180-0022 | 東京都武蔵野市境1-18-6                                               | 0422-51-0301 | <a href="https://tenseikai.jp/sakai-hosp/">https://tenseikai.jp/sakai-hosp/</a>           | ○                  | ○                  | 内科                                   | 天野 英介           |                                              |
| 1809 | 武蔵境病院附属あんずクリニック | 180-0023 | 東京都武蔵野市境南町4-1-15                                             | 0422-50-9770 | <a href="https://www.tenseikai.jp/anzu-clinic/">https://www.tenseikai.jp/anzu-clinic/</a> | ○                  | ○                  | 整形外科 内科<br>皮膚科 小児科<br>リハビリテー<br>ション科 | 天野 秀介<br>十河 まゆみ |                                              |

電話や情報通信機器を用いて診療を実施する医療機関の一覧（東京都）

|      | 基本情報                     |          |                                 |              |                                                                                   | 事務連絡に基づく対応について     |                    |                                     |       |                                              |
|------|--------------------------|----------|---------------------------------|--------------|-----------------------------------------------------------------------------------|--------------------|--------------------|-------------------------------------|-------|----------------------------------------------|
|      | 施設名                      | 郵便番号     | 住所（都道府県から記載）                    | 電話番号         | ウェブサイトURL                                                                         | 初診の電話等を用いた診療の実施の有無 | 再診の電話等を用いた診療の実施の有無 | 対応診療科                               | 担当医師名 | 対面診療が必要と判断した場合に連携する医療機関名（複数ある場合は複数、住所も併せて記載） |
| 1810 | 武蔵野アトラスターズ整形外科 スポーツクリニック | 180-0006 | 東京都武蔵野市中町1-24-15<br>メディアパーク中町2F | 0422-38-8015 | <a href="http://www.musashinoasc.com">http://www.musashinoasc.com</a>             |                    | ○                  | 整形外科<br>リハビリテーション科                  | 丸野 秀人 |                                              |
| 1811 | むさしの共立診療所                | 180-0013 | 東京都武蔵野市西久保2-17-11               | 0422-52-2512 | <a href="http://www.kyoritsuclinic.org/">http://www.kyoritsuclinic.org/</a>       |                    | ○                  | 内科                                  | 村田 嘉彦 |                                              |
| 1812 | むさしの糖尿病・甲状腺クリニック         | 180-0022 | 東京都武蔵野市境1-15-10<br>イストワール1F101号 | 0422-56-1510 | <a href="https://musashino-dm-thyroid.com/">https://musashino-dm-thyroid.com/</a> |                    | ○                  | 内科 内分泌内<br>科 糖尿病内<br>科              | 田口 学  |                                              |
| 1813 | むさしのメンタルクリニック            | 180-0022 | 東京都武蔵野市境2-14-8<br>アドニス・モリヤ1F    | 0422-53-5155 |                                                                                   |                    | ○                  | 心療内科 精神<br>科                        | 原 仁美  |                                              |
| 1814 | むらくにクリニック                | 180-0003 | 東京都武蔵野市吉祥寺南町1-5-12              | 0422-76-8036 |                                                                                   |                    | ○                  | 内科（外科、肛<br>門外科、乳腺外<br>科等は対面診療<br>要） | 村國 均  |                                              |
| 1815 | メディカルクリニック武蔵境            | 180-0023 | 東京都武蔵野市境南町2-8-19                | 0422-39-5654 | <a href="http://wafukai.or.jp">http://wafukai.or.jp</a>                           |                    | ○                  | 脳神経外科 内<br>科                        | 藤井 芳樹 |                                              |
| 1816 | もとはし内科                   | 180-0001 | 東京都武蔵野市吉祥寺北町2-19-9              | 0422-23-6886 | <a href="http://www.motohashinaika.com">http://www.motohashinaika.com</a>         |                    | ○                  | 内科 消化器内<br>科 代謝内科<br>腎臓内科           | 本橋 茂  |                                              |
| 1817 | 安岡整形外科脳外科クリニック           | 180-0004 | 東京都武蔵野市吉祥寺本町2-14-8              | 0422-20-2010 | <a href="http://www.yasuoka-clinic.com/sp/">http://www.yasuoka-clinic.com/sp/</a> | ○                  | ○                  | 整形外科 脳外<br>科 リハビリ<br>テーション科         | 安岡 正蔵 |                                              |
| 1818 | 湯川リウマチ内科クリニック            | 180-0023 | 東京都武蔵野市境南町3-14-6-3F             | 0422-31-1155 | <a href="http://www.yukawa-clinic.jp/">http://www.yukawa-clinic.jp/</a>           | ○                  | ○                  | 内科<br>リウマチ科                         | 湯川宗之助 | 武蔵野赤十字病院（東京都武蔵野市境南町1-26-1）                   |

電話や情報通信機器を用いて診療を実施する医療機関の一覧（東京都）

|      | 基本情報                    |          |                                 |              |                                                                                                     | 事務連絡に基づく対応について     |                    |             |                        |                                                             |
|------|-------------------------|----------|---------------------------------|--------------|-----------------------------------------------------------------------------------------------------|--------------------|--------------------|-------------|------------------------|-------------------------------------------------------------|
|      | 施設名                     | 郵便番号     | 住所（都道府県から記載）                    | 電話番号         | ウェブサイトURL                                                                                           | 初診の電話等を用いた診療の実施の有無 | 再診の電話等を用いた診療の実施の有無 | 対応診療科       | 担当医師名                  | 対面診療が必要と判断した場合に連携する医療機関名（複数ある場合は複数、住所も併せて記載）                |
| 1819 | 吉方病院                    | 180-0006 | 東京都武蔵野市中町2-2-4                  | 0422-52-4371 | <a href="http://valuelab.co.jp/yoshikata/index.html">http://valuelab.co.jp/yoshikata/index.html</a> | ○                  | ○                  | 整形外科        | 花岡 央屋                  |                                                             |
| 1820 | よしかた内科                  | 180-0011 | 東京都武蔵野市八幡町3-1-19                | 0422-50-0351 |                                                                                                     |                    | ○                  | 内科          | 吉方 久雄                  |                                                             |
| 1821 | らいおんハート武蔵野脳神経外科内科クリニック  | 180-0011 | 東京都武蔵野市八幡町3-1-25                | 0422-52-6600 |                                                                                                     |                    | ○                  | 脳神経外科 内科    | 仲川 和彦                  |                                                             |
| 1822 | 良寛子どもファミリークリニック         | 180-0006 | 東京都武蔵野市中町2-4-5 1階               | 0422-27-8621 | <a href="http://www.ryoukanclinic.com">http://www.ryoukanclinic.com</a>                             |                    | ○                  | 内科 小児科      | 林 良寛<br>林 知子           |                                                             |
| 1823 | わかばひふ科クリニック             | 180-0002 | 東京都武蔵野市吉祥寺東町2-11-2-1F           | 0422-22-1232 | <a href="http://www.fc@wakaba-hifuka.com">http://www.fc@wakaba-hifuka.com</a>                       |                    | ○                  | 皮膚科         | 野崎 誠                   |                                                             |
| 1824 | 渡辺医院                    | 180-0004 | 東京都武蔵野市吉祥寺本町4-7-9               | 0422-22-8937 |                                                                                                     | ○                  | ○                  | 内科          | 渡辺 滋                   |                                                             |
| 1825 | 吉祥寺まいにちクリニック            | 180-0004 | 東京都武蔵野市吉祥寺本町1-9-10<br>レインボービル2階 | 0422-29-3092 | <a href="https://kichijojiclinic.com/">https://kichijojiclinic.com/</a>                             | ○                  | ○                  | 内科、泌尿器科、皮膚科 | 柳澤薫                    |                                                             |
| 1826 | 173総合内科クリニック            | 181-0013 | 東京都三鷹市下連雀6-8-50                 | 0422-26-5173 | <a href="https://173clinic.jp/">https://173clinic.jp/</a>                                           | ○                  | ○                  | 内科<br>泌尿器科  | 稲見 光春<br>峰村 広<br>中野 由梨 | 杏林大学病院 東京都三鷹市新川6丁目20-2 日本赤十字社・武蔵野赤十字病院<br>東京都武蔵野市境南町1丁目26-1 |
| 1827 | 医療法人社団MYCサウスポイントMYクリニック | 181-0013 | 東京都三鷹市下連雀3-43-23サウスポイント三鷹2・3F   | 0422-46-7851 | <a href="https://www.sp-myclinic.com/">https://www.sp-myclinic.com/</a>                             |                    | ○                  | 内科、整形外科     | 宮坂芳郎 徳永尊彦              |                                                             |

電話や情報通信機器を用いて診療を実施する医療機関の一覧（東京都）

|      | 基本情報                  |           |                             |              |                                                | 事務連絡に基づく対応について     |                    |                                                                   |                  |                                                             |
|------|-----------------------|-----------|-----------------------------|--------------|------------------------------------------------|--------------------|--------------------|-------------------------------------------------------------------|------------------|-------------------------------------------------------------|
|      | 施設名                   | 郵便番号      | 住所（都道府県から記載）                | 電話番号         | ウェブサイトURL                                      | 初診の電話等を用いた診療の実施の有無 | 再診の電話等を用いた診療の実施の有無 | 対応診療科                                                             | 担当医師名            | 対面診療が必要と判断した場合に連携する医療機関名（複数ある場合は複数、住所も併せて記載）                |
| 1828 | 医療法人社団うちはら内科クリニック     | 181-0012  | 東京都三鷹市上連雀7丁目1番7号石井ビル1階      | 0422-40-6180 | http://www.uchihara-clinic.com                 | ○                  | ○                  | 内科                                                                | 内原正勝             |                                                             |
| 1829 | 医療法人社団 片平内科クリニック      | 181-00013 | 東京都三鷹市下連雀3-27-12-4F         | 0422-79-0271 | http://www001.upp.sonet.ne.jp/katahira_medcli/ |                    | ○                  | 内科                                                                | 片平 宏             |                                                             |
| 1830 | 医) 桜一会 かの内科           | 181-0013  | 東京都三鷹市下連雀3丁目44-17エルヴェ三鷹203  | 0422-40-5022 | info@kanno-naika.com                           | ○                  | ○                  | 内科<br>糖尿病<br>内分泌代謝科                                               | 菅野 一男            |                                                             |
| 1831 | 医療法人財団慈生会野村病院         | 181-8503  | 東京都三鷹市下連雀8-3-6              | 0422-47-4848 | https://www.nomura.or.jp/                      |                    | ○                  | 一般内科<br>消化器内科<br>神経内科<br>糖尿病内科<br>循環器内科<br>呼吸器内科<br>血液内科<br>消化器外科 | 各担当医             |                                                             |
| 1832 | 医療法人社団かえでこどもクリニック     | 181-0011  | 東京都三鷹市井口3-6-16アップルかえで通りビル1F | 0422-39-3306 | https://kaede-kodomo.jp/                       | ○                  | ○                  | 小児科                                                               | 小口 薫             | 杏林大学医学部付属病院（東京都三鷹市新川6丁目20-2）<br>武蔵野赤十字病院（東京都武蔵野市境南町1丁目26-1） |
| 1833 | 医療法人社団佳仁会三鷹第一クリニック    | 181-0013  | 東京都三鷹市下連雀8-9-21             | 0422-46-4141 | http://keijin-kai.or.jp/daiichi_hp/            |                    | ○                  | 内科                                                                | 宇井 義典            | 杏林大学医学部付属病院（東京都三鷹市新川6-20-2）<br>武蔵野赤十字病院（東京都武蔵野市境南町1-26-1）   |
| 1834 | 医療法人社団CVIC三鷹心臓クリニック   | 181-0013  | 東京都三鷹市下連雀3-26-9サンシロービル4F    | 03-4500-1670 | https://www.mitakaclinic.com/                  |                    | ○                  | 循環器内科<br>内科                                                       | 寺島 正浩<br>高桑 蓉子   |                                                             |
| 1835 | 医療法人社団千実会あきやま子どもクリニック | 181-0012  | 東京都三鷹市上連雀4-3-3川口ビル1階        | 0422-70-5777 | https://www.akiyamakodomo.com/                 | ○                  | ○                  | 小児科                                                               | 秋山千枝子<br>宗像可枝    |                                                             |
| 1836 | 医療法人社団理恵会新川クリニック      | 181-0004  | 東京都三鷹市新川5-6-21              | 0422-43-0123 | http://park18.wakwak.com/~shinkawa-clinic/     | ○                  | ○                  | 内科<br>小児科<br>皮膚科                                                  | 新後閑 周二<br>新後閑 弘章 |                                                             |

電話や情報通信機器を用いて診療を実施する医療機関の一覧（東京都）

|      | 基本情報            |          |                                   |              |                                                                                       | 事務連絡に基づく対応について     |                     |                                                        |                      |                                              |
|------|-----------------|----------|-----------------------------------|--------------|---------------------------------------------------------------------------------------|--------------------|---------------------|--------------------------------------------------------|----------------------|----------------------------------------------|
|      | 施設名             | 郵便番号     | 住所（都道府県から記載）                      | 電話番号         | ウェブサイトURL                                                                             | 初診の電話等を用いた診療の実施の有無 | 再診の電話等を用いた診療の実施の有無  | 対応診療科                                                  | 担当医師名                | 対面診療が必要と判断した場合に連携する医療機関名（複数ある場合は複数、住所も併せて記載） |
| 1837 | 杏林大学医学部付属病院     | 181-8611 | 東京都三鷹市新川6丁目20番2号                  | 0422-47-5511 | <a href="http://www.kyorin-u.ac.jp/hospital/">http://www.kyorin-u.ac.jp/hospital/</a> |                    | ○<br>対面診療が必要となる場合あり | 内科、循環器科、小児科、皮膚科、精神科、外科、脳神経外科、整形外科、心臓血管外科、形成外科、小児外科、泌尿器 | 各医師                  |                                              |
| 1838 | 公益財団法人 井之頭病院    | 181-8531 | 東京都三鷹市上連雀4-14-1                   | 0422-44-5521 | <a href="http://www.inokashira-hp.or.jp">http://www.inokashira-hp.or.jp</a>           |                    | ○<br>病状が安定した患者のみ    | 精神科                                                    | 精神科医師全員              |                                              |
| 1839 | 第一医院            | 181-0013 | 東京都三鷹市下連雀4-17-30                  | 0422-43-8636 |                                                                                       |                    | ○                   | 内科                                                     | 谷口 亮一                | 医療法人慈誠会野村病院（東京都三鷹市下連雀8丁目3番6号）                |
| 1840 | 高松メディカルクリニック    | 181-0013 | 東京都三鷹市下連雀4-16-12三鷹第一ビル2F          | 0422-70-1035 | <a href="https://www.takamatsu-medical.com/">https://www.takamatsu-medical.com/</a>   |                    | ○                   | 内科                                                     | 高松 慶太                | 野村病院（東京都三鷹市下連雀8-3-6）                         |
| 1841 | 東京国際大塚病院        | 181-0013 | 東京都三鷹市下連雀4-8-40                   | 0422-47-1000 | <a href="https://ohori-hosp.jp/">https://ohori-hosp.jp/</a>                           |                    | ○                   | 泌尿器科                                                   | 大堀・権藤・錦木・豊永・竹内・夏山・山下 |                                              |
| 1842 | のぞみメモリークリニック    | 181-0013 | 東京都三鷹市下連雀4-2-8                    | 0422-70-3880 | <a href="http://www.nozomi-mem.jp/index.html">http://www.nozomi-mem.jp/index.html</a> |                    | ○                   | 精神科<br>神経内科                                            | 木之下 徹                |                                              |
| 1843 | 長谷川病院           | 181-8586 | 東京都三鷹市大沢2-20-36                   | 0422-31-8600 | <a href="http://hasegawa-hp.or.jp">hasegawa-hp.or.jp</a>                              |                    | ○                   | 精神科                                                    | 当日の当番医               |                                              |
| 1844 | 花植こころ・からだのクリニック | 181-0013 | 東京都三鷹市下連3-34-15<br>アトラス三鷹レジデンス 2階 | 0422-72-0022 | <a href="http://www.hanadate-clinic.com">http://www.hanadate-clinic.com</a>           |                    | ○                   | 心療内科<br>精神科                                            | 加藤 王康                |                                              |
| 1845 | 三鷹駅前クリニック耳鼻咽喉科  | 181-0013 | 東京都三鷹市下連雀3丁目36-1 トリコナ3F           | 0422-26-9810 | <a href="http://mitaka-jibiinkouka.com">http://mitaka-jibiinkouka.com</a>             | ○                  | ○                   | 耳鼻咽喉科                                                  | 池谷 淳                 | 河北総合病院（東京都杉並区阿佐谷北1-7-3）                      |

電話や情報通信機器を用いて診療を実施する医療機関の一覧（東京都）

|      | 基本情報             |          |                              |              |                                                                                                     | 事務連絡に基づく対応について     |                    |                  |                                  |                                                                                       |
|------|------------------|----------|------------------------------|--------------|-----------------------------------------------------------------------------------------------------|--------------------|--------------------|------------------|----------------------------------|---------------------------------------------------------------------------------------|
|      | 施設名              | 郵便番号     | 住所（都道府県から記載）                 | 電話番号         | ウェブサイトURL                                                                                           | 初診の電話等を用いた診療の実施の有無 | 再診の電話等を用いた診療の実施の有無 | 対応診療科            | 担当医師名                            | 対面診療が必要と判断した場合に連携する医療機関名（複数ある場合は複数、住所も併せて記載）                                          |
| 1846 | 三鷹駅前内科・糖尿病クリニック  | 180-0013 | 東京都三鷹市下連雀3-36-1 トリコナ3階       | 0422-24-8010 | <a href="https://mitaka-dm.com/">https://mitaka-dm.com/</a>                                         | ○                  | ○                  | 内科<br>糖尿病内科      | 田中 祐希<br>国東 拓也<br>玉寄 皓大<br>高岡由梨子 | 杏林大学医学部付属病院（東京都三鷹市新川6-20-2）<br>武蔵野赤十字病院（東京都武蔵野市境南町1-26-1）<br>河北総合病院（東京都杉並区阿佐ヶ谷北1-7-3） |
| 1847 | みたかクリニック         | 181-0004 | 東京都三鷹市新川3-21-12              | 0422-26-5351 | <a href="http://mitaka.edaclinic.jp/">http://mitaka.edaclinic.jp/</a>                               |                    | ○                  | 整形外科             | 沼崎 伸                             | 杏林大学病院（東京都三鷹市）                                                                        |
| 1848 | 三鷹さくらクリニック       | 181-0002 | 東京都三鷹市牟礼2-11-5               | 0422-43-6410 | <a href="http://mitaka-sakura.com/">http://mitaka-sakura.com/</a>                                   | ○                  | ○                  | 内科<br>小児科        | 古川秋生                             |                                                                                       |
| 1849 | みたか循環器内科         | 181-0012 | 三鷹市上連雀2-4-8                  | 0422-45-1210 | <a href="https://mitakacardio.com/">https://mitakacardio.com/</a>                                   |                    | ○                  | 循環器内科<br>内科      | 宮本貴庸                             |                                                                                       |
| 1850 | 三鷹東クリニック         | 181-0003 | 東京都三鷹市北野4-8-40-1階            | 03-6909-0565 | <a href="http://houmonshinryou.com/clinic/jukei-03/">http://houmonshinryou.com/clinic/jukei-03/</a> |                    | ○                  | 内科<br>外科<br>老年内科 | 山城 理仁                            |                                                                                       |
| 1851 | たなべ耳鼻咽喉科         | 181-0012 | 東京都三鷹市上連雀9-15-24<br>メゾンドール1階 | 0422-70-3387 | <a href="https://www.tanabe-orl.jp">https://www.tanabe-orl.jp</a>                                   |                    | ○                  | 耳鼻咽喉科            | 田鍋 志保                            |                                                                                       |
| 1852 | 三鷹駅ころえがおクリニック    | 181-0012 | 東京都三鷹市上連雀2-1-10 KBビル301      | 0422-71-3556 | <a href="https://kokoro-egao.net/">https://kokoro-egao.net/</a>                                     |                    | ○                  | 精神科<br>心療内科      | 山田佳幸                             |                                                                                       |
| 1853 | 青梅耳鼻咽喉科          | 198-0024 | 東京都青梅市新町2-16-2               | 0428-34-9833 | <a href="https://omejibika.com/">https://omejibika.com/</a>                                         |                    | ○                  | 耳鼻いんこう科          | 坂本 恵                             | 青梅市立総合病院（東京都青梅市東青梅4-16-5）                                                             |
| 1854 | 医療法人社団幸悠会 鈴木慈光病院 | 198-0052 | 東京都青梅市長洲五丁目1086番地            | 0428-22-3126 | <a href="http://www.kouyukai1968.or.jp">http://www.kouyukai1968.or.jp</a>                           |                    | ○                  | 精神科              | 各医師                              |                                                                                       |

電話や情報通信機器を用いて診療を実施する医療機関の一覧（東京都）

|      | 基本情報           |          |                        |              |                                      | 事務連絡に基づく対応について     |                    |                                                                |                                                                                                                                                                              |                                                                                          |
|------|----------------|----------|------------------------|--------------|--------------------------------------|--------------------|--------------------|----------------------------------------------------------------|------------------------------------------------------------------------------------------------------------------------------------------------------------------------------|------------------------------------------------------------------------------------------|
|      | 施設名            | 郵便番号     | 住所（都道府県から記載）           | 電話番号         | ウェブサイトURL                            | 初診の電話等を用いた診療の実施の有無 | 再診の電話等を用いた診療の実施の有無 | 対応診療科                                                          | 担当医師名                                                                                                                                                                        | 対面診療が必要と判断した場合に連携する医療機関名（複数ある場合は複数、住所も併せて記載）                                             |
| 1855 | 医療法人社団 新町クリニック | 198-0024 | 東京都青梅市新町3-53-5         | 0428-31-5377 | http://www.shinmachi-cl.com          |                    | ○                  | 内科                                                             | 神應 知道                                                                                                                                                                        | 高木病院（東京都青梅市今寺5-18-19）                                                                    |
| 1856 | 下奥多摩医院         | 198-0052 | 東京都青梅市長淵4-376-1        | 0428-22-2580 | https://www.shimookutamaclinic.com/  |                    | ○                  | 内科                                                             | 古味 隆子                                                                                                                                                                        |                                                                                          |
| 1857 | 友田クリニック        | 357-0023 | 東京都青梅市友田町3-136-1       | 0428-25-1173 | http://ntcc.or.jp                    |                    | ○                  | 内科                                                             | 小沼 裕寿                                                                                                                                                                        | 青梅市立総合病院（東京都青梅市東青梅4-16-5）<br>公立福生病院（東京都福生市加美平1-6-1）                                      |
| 1858 | 東青梅診療所         | 198-0042 | 東京都青梅市東青梅1-7-5         | 0428-25-8651 | http://ome-clinic.com                | ○                  | ○                  | 内科<br>小児科<br>外科<br>泌尿器科<br>眼科                                  | 武信 康弘<br>武信 敦里<br>川口 有紀子<br>小沼 憲祥<br>樋野 忠司<br>清河 宏倫                                                                                                                          | 青梅市立総合病院（東京都青梅市東青梅4-16-5）                                                                |
| 1859 | 医療法人社団大慈会慈秀病院  | 183-0011 | 東京都府中市白糸台三丁目16番地の5     | 042-369-1511 | http://www.jishu-hp.jp/              |                    | ○                  | 内科<br>腎臓内科                                                     | 稲垣 雄一朗<br>他                                                                                                                                                                  | 多摩総合医療センター（東京都府中市武蔵台2丁目8-29）                                                             |
| 1860 | おき医院           | 183-0011 | 東京都府中市白糸台5-24-1フジビル102 | 042-354-1277 | https://www.okinopio.jp              | ○                  | ○                  | 小児科<br>アレルギー科                                                  | 隠岐直紀<br>川原亜由美                                                                                                                                                                | 武蔵野赤十字病院（東京都武蔵野市境南町1-26-1）<br>多摩総合医療センター（東京都府中市武蔵台2-8-29）<br>小児総合医療センター（東京都府中市武蔵台2-8-29） |
| 1861 | 榊原記念病院         | 183-0003 | 東京都府中市朝日町3-16-1        | 042-314-3111 | http://www.hp.heart.or.jp/           | ○                  | ○                  | 循環器内科                                                          | 各医師にて対応                                                                                                                                                                      |                                                                                          |
| 1862 | 崎山小児科          | 183-0042 | 東京都府中市武蔵台3-2-2         | 042-322-7859 | http://www.sakiyama.or.jp            | ○                  | ○                  | 小児科                                                            | 崎山 弘                                                                                                                                                                         |                                                                                          |
| 1863 | 多摩総合医療センター     | 183-8524 | 東京都府中市武蔵台2丁目8番29号      | 042-323-5111 | https://www.fuchu-hp.fuchu.tokyo.jp/ |                    | ○                  | 整形外科<br>リウマチ膠原病科<br>外科・乳腺外科<br>消化器内科<br>脳神経内科<br>血液内科<br>呼吸器内科 | 整形外科：伊賀 暁、その他診療科各担当<br>リウマチ膠原病科：島田 浩太、その他診療科各担当<br>外科・乳腺外科：森田 泰弘、その他診療科各担当<br>消化器内科：並木 伸、その他診療科各担当<br>脳神経内科：川田 明広、その他診療科各担当<br>血液内科：香西 康司、その他診療科各担当<br>呼吸器内科：高森 幹雄、その他診療科各担当 |                                                                                          |

電話や情報通信機器を用いて診療を実施する医療機関の一覧（東京都）

|      | 基本情報                    |          |                                 |              |                                                                                                         | 事務連絡に基づく対応について     |                    |                                                                   |                                                                    |                                              |
|------|-------------------------|----------|---------------------------------|--------------|---------------------------------------------------------------------------------------------------------|--------------------|--------------------|-------------------------------------------------------------------|--------------------------------------------------------------------|----------------------------------------------|
|      | 施設名                     | 郵便番号     | 住所（都道府県から記載）                    | 電話番号         | ウェブサイトURL                                                                                               | 初診の電話等を用いた診療の実施の有無 | 再診の電話等を用いた診療の実施の有無 | 対応診療科                                                             | 担当医師名                                                              | 対面診療が必要と判断した場合に連携する医療機関名（複数ある場合は複数、住所も併せて記載） |
| 1864 | 東京都立小児総合医療センター          | 183-8561 | 東京都府中市武蔵台2-8-29                 | 042-300-5111 | <a href="https://www.byouin.metro.tokyo.lg.jp/shouni/">https://www.byouin.metro.tokyo.lg.jp/shouni/</a> |                    | ○                  | 予約センター<br>(電話042-312-8200)へ平日<br>9:00~16:00の<br>間にお問い合わせ<br>ください。 | 外来担当医                                                              |                                              |
| 1865 | 東府中病院                   | 183-0005 | 東京都府中市若松町2-7-20                 | 042-364-0151 | <a href="https://www.higashifuchu-hp.jp/">https://www.higashifuchu-hp.jp/</a>                           | ○                  | ○                  | 内科<br>小児科<br>産婦人科                                                 | 西弘示<br>川端利信<br>秋林雅也<br>繁友憲郎<br>里見操緒<br>細野真沙子<br>十蔵寺晶子              |                                              |
| 1866 | 府中駅前クリニック               | 183-0023 | 東京都府中市宮町1-100 ル・シーニュ4階          | 042-319-8383 | <a href="https://fuchu.towakai.com/">https://fuchu.towakai.com/</a>                                     |                    | ○                  | 内科                                                                | 金澤 寛之                                                              |                                              |
| 1867 | 府中恵仁会病院                 | 183-8507 | 東京都府中市住吉町5-21-1                 | 042-365-1211 | <a href="https://www.fuchu-keijinkai.or.jp/">https://www.fuchu-keijinkai.or.jp/</a>                     |                    | ○                  | 内科<br>外科<br>脳神経外科                                                 | 上林 拓男<br>小林 泉<br>伊奈 秀高<br>畑田 英彦<br>倉田 勇<br>久保 佳史<br>福地 孝明<br>名倉 正利 |                                              |
| 1868 | あさの循環器内科クリニック           | 183-0056 | 東京都府中市寿町1-4-2 1<br>第3福井ビル2F     | 042-366-5555 | <a href="http://www.asanoclinic.jp/">http://www.asanoclinic.jp/</a>                                     |                    | ○                  | 内科<br>循環器内科                                                       | 浅野竜太                                                               |                                              |
| 1869 | 宮西クリニック                 | 183-0022 | 東京都府中市宮西町2-4-3<br>アイスパークビル2F    | 042-362-5833 |                                                                                                         | ○                  | ○                  | 内科<br>小児科                                                         | 大谷哲士                                                               |                                              |
| 1870 | 寿町クリニック                 | 183-0056 | 東京都府中市寿町1-3-10<br>藤和府中コープ101    | 042-354-3111 | <a href="http://kc-clinic.jp/">http://kc-clinic.jp/</a>                                                 | ○                  | ○                  | 脳神経外科                                                             | 賣野智之                                                               | 都立多摩総合医療センター<br>(東京都府中市武蔵野台2-9-2)            |
| 1871 | 愛和診療所                   | 183-0051 | 東京都府中市栄町3-12-1<br>マイカルビル・グレイス1F | 042-314-1551 | <a href="http://www.aiwa-cl.net">http://www.aiwa-cl.net</a>                                             |                    | ○                  | 内科 小児科<br>精神科 漢方内<br>科 疼痛緩和内<br>科                                 | 柴田 光太郎                                                             |                                              |
| 1872 | 医療法人社団均禮会<br>府中の森土産産婦人科 | 183-0055 | 東京都府中市府中町3-10-9                 | 042-351-3748 | <a href="http://wwwtsuchiyaclinic.com">http://wwwtsuchiyaclinic.com</a>                                 |                    | ○                  | 産婦人科                                                              | 土屋 清志                                                              |                                              |



電話や情報通信機器を用いて診療を実施する医療機関の一覧（東京都）

|      | 基本情報                               |          |                               |              |                                                                                                               | 事務連絡に基づく対応について     |                    |                       |                                                                      |                                              |
|------|------------------------------------|----------|-------------------------------|--------------|---------------------------------------------------------------------------------------------------------------|--------------------|--------------------|-----------------------|----------------------------------------------------------------------|----------------------------------------------|
|      | 施設名                                | 郵便番号     | 住所（都道府県から記載）                  | 電話番号         | ウェブサイトURL                                                                                                     | 初診の電話等を用いた診療の実施の有無 | 再診の電話等を用いた診療の実施の有無 | 対応診療科                 | 担当医師名                                                                | 対面診療が必要と判断した場合に連携する医療機関名（複数ある場合は複数、住所も併せて記載） |
| 1873 | 昭島リウマチ膠原病内科                        | 196-0024 | 東京都昭島市宮沢町495-30               | 042-546-0011 | <a href="https://akishima-rheumatologist.jp/">https://akishima-rheumatologist.jp/</a>                         |                    | ○                  | 内科<br>リウマチ科<br>アレルギー科 | 吉岡拓也                                                                 |                                              |
| 1874 | うしお病院                              | 196-0021 | 東京都昭島市武蔵野2-7-12               | 042-541-5423 | <a href="http://www.usio-hp.com/">http://www.usio-hp.com/</a>                                                 | ○                  | ○                  | 内科<br>外科、胃腸科<br>整形外科  | 加藤 真帆人<br>杉本 大<br>森川 五竜<br>万本 潤<br>渡部 泰幸                             |                                              |
| 1875 | 麻生こどもクリニック                         | 182-0026 | 東京都調布市小島町1-5-6                | 042-480-7810 | <a href="https://www.aso-kodomo.jp/">https://www.aso-kodomo.jp/</a>                                           |                    | ○                  | 小児科                   | 麻生 泰二                                                                |                                              |
| 1876 | 医療法人社団青山会<br>青木病院                  | 182-0035 | 東京都調布市上石原3丁目33番地の17           | 042-483-1355 | <a href="http://www.aoki-hospital.jp/">http://www.aoki-hospital.jp/</a>                                       |                    | ○                  | 内科<br>精神科             | 各医師                                                                  |                                              |
| 1877 | 医療法人社団あすなろの<br>会 ぬきいこどもクリ<br>ニック   | 182-0022 | 東京都調布市国領町4-8-1 プラザパレット2階      | 042-440-0215 | <a href="http://www.anssam.com/yoyaku/nkcymb/rsv_top.asp">http://www.anssam.com/yoyaku/nkcymb/rsv_top.asp</a> | ○                  | ○                  | 小児科 アレル<br>ギー科        | 貫井清孝                                                                 |                                              |
| 1878 | 医療法人社団CVIC<br>仙川心臓クリニック            | 182-0002 | 東京都調布市仙川町2-12-6<br>アヴェニール仙川1階 | 03-4500-1310 | <a href="https://www.cviclinic-sengawa.com/">https://www.cviclinic-sengawa.com/</a>                           |                    | ○                  | 循環器内科<br>内科           | 寺島 正浩<br>濱田 佳江                                                       |                                              |
| 1879 | 医療法人社団スリープ<br>クリニック<br>スリープクリニック調布 | 182-0026 | 東京都調布市小島町2-53-1               | 042-490-0700 | <a href="https://www.sleepmedicine-tokyo.com/">https://www.sleepmedicine-tokyo.com/</a>                       |                    | ○                  | 精神科<br>心療内科           | 当日の担当医                                                               |                                              |
| 1880 | 医療法人社団東山会<br>調布東山病院                | 182-0026 | 東京都調布市小島町2-32-17              | 042-481-5511 | <a href="https://www.touzan.or.jp/">https://www.touzan.or.jp/</a>                                             |                    | ○                  | 各科                    | 担当医                                                                  |                                              |
| 1881 | 医療法人社団大和会<br>多摩川病院                 | 182-0022 | 東京都調布市国領町5-31-1               | 042-483-4114 | <a href="https://tamagawahp.jp/">https://tamagawahp.jp/</a>                                                   | ○                  | ○                  | 内科<br>循環器内科<br>整形外科   | 後藤 紀史<br>天野 茂夫<br>齋藤 正之<br>駒形 正志<br>太田 晃一<br>前園 知宏<br>高亀 則博<br>清水 孝夫 |                                              |

電話や情報通信機器を用いて診療を実施する医療機関の一覧（東京都）

|      | 基本情報                 |          |                                 |               |                                                                           | 事務連絡に基づく対応について     |                    |             |                        |                                              |
|------|----------------------|----------|---------------------------------|---------------|---------------------------------------------------------------------------|--------------------|--------------------|-------------|------------------------|----------------------------------------------|
|      | 施設名                  | 郵便番号     | 住所（都道府県から記載）                    | 電話番号          | ウェブサイトURL                                                                 | 初診の電話等を用いた診療の実施の有無 | 再診の電話等を用いた診療の実施の有無 | 対応診療科       | 担当医師名                  | 対面診療が必要と判断した場合に連携する医療機関名（複数ある場合は複数、住所も併せて記載） |
| 1882 | 医療法人社団ラサンテくにしわかクリニック | 182-0033 | 東京都調布市富士見町2-14-19三ツ木富士見町マンション1階 | 080-5529-8117 | <a href="https://www.e-kuni.jp">https://www.e-kuni.jp</a>                 | ○                  | ○                  | 内科、呼吸器科     | 國澤晃、金子和代、川述剛士、濱中和嘉子    | 杏林大学病院（東京都三鷹市新川6-20-2）                       |
| 1883 | 永研会クリニック             | 182-0002 | 東京都調布市仙川町1-11-8 2F              | 03-5315-1181  | <a href="http://eikenc1.jp/">http://eikenc1.jp/</a>                       | ○                  | ○                  | 内科<br>整形外科  | 羽田 谷川<br>菊地 西迫         |                                              |
| 1884 | くろかわクリニック            | 182-0022 | 東京都調布市国領町5-70-2サン・ルーシー 2階       | 042-444-4880  | <a href="http://kurokawa.byoinnavi.jp/">http://kurokawa.byoinnavi.jp/</a> |                    | ○                  | 内科          | 黒川富貴子                  |                                              |
| 1885 | 国領駅前耳鼻科              | 182-0022 | 東京都調布市国領町3-10-24 レジエンド国領1F      | 042-440-1187  | <a href="http://kokuryo.sho-jin.com/">http://kokuryo.sho-jin.com/</a>     | ○                  | ○                  | 耳鼻科         | 本田 英幸                  |                                              |
| 1886 | 国領内科・消化器内科クリニック      | 182-0022 | 東京都調布市国領町3-3-20 よろずやビル201号室     | 042-426-9509  | <a href="https://kokuryou-naika.com/">https://kokuryou-naika.com/</a>     |                    | ○                  | 内科          | 高田 康裕                  |                                              |
| 1887 | 国領医院                 | 182-0022 | 東京都調布市国領町7-46-5                 | 042-482-2600  |                                                                           |                    | ○                  | 内科<br>血液内科  | 薄井 紀子                  | 東京慈恵会医科大学附属第三病院（東京都狛江）                       |
| 1888 | 国領めいようクリニック          | 182-0022 | 東京都調布市国領町8-6-8                  | 042-440-1515  | <a href="http://www.meiyou-clinic.com/">http://www.meiyou-clinic.com/</a> |                    | ○                  | 内科<br>整形外科  | 富永 伸徳<br>菅澤 源<br>堀江 俊裕 |                                              |
| 1889 | せき循環器内科クリニック         | 182-0026 | 東京都調布市小島町1-14-3ヒューリック調布2F       | 042-487-1505  | <a href="http://sekiclinic.net">http://sekiclinic.net</a>                 |                    | ○                  | 循環器内科<br>内科 | 関 敦                    |                                              |
| 1890 | 仙川整形外科               | 182-0002 | 東京都調布市仙川町 3-2-4 ウィステリア仙川1階A     | 03-3305-0088  | <a href="https://sengawa-ortho.jp">https://sengawa-ortho.jp</a>           |                    | ○                  | 整形外科        | 日下部 浩                  |                                              |

電話や情報通信機器を用いて診療を実施する医療機関の一覧（東京都）

|      | 基本情報                 |          |                                   |               |                                                                                       | 事務連絡に基づく対応について     |                    |                                       |                |                                              |
|------|----------------------|----------|-----------------------------------|---------------|---------------------------------------------------------------------------------------|--------------------|--------------------|---------------------------------------|----------------|----------------------------------------------|
|      | 施設名                  | 郵便番号     | 住所（都道府県から記載）                      | 電話番号          | ウェブサイトURL                                                                             | 初診の電話等を用いた診療の実施の有無 | 再診の電話等を用いた診療の実施の有無 | 対応診療科                                 | 担当医師名          | 対面診療が必要と判断した場合に連携する医療機関名（複数ある場合は複数、住所も併せて記載） |
| 1891 | 仙川脳神経外科クリニック         | 182-0002 | 東京都調布市仙川町3-9-15モンヴィラージュ仙川1階       | 03-5969-8061  | <a href="https://sncl.jp/">https://sncl.jp/</a>                                       |                    | ○                  | 脳神経外科                                 | 山口竜一           |                                              |
| 1892 | 調布駅前クリニック<br>耳鼻咽喉科   | 182-0024 | 東京都調布市布田4-17-10<br>セントラルレジデンス調布3F | 042-441-5161  | <a href="http://chofu.sho-jin.com/">http://chofu.sho-jin.com/</a>                     | ○                  | ○                  | 耳鼻科                                   | 高原 恵理子         |                                              |
| 1893 | 桐光会 調布病院             | 182-0034 | 東京都調布市下石原3-4-5-1                  | 042-484-2626  | <a href="http://www.tokokai.or.jp/">http://www.tokokai.or.jp/</a>                     |                    | ○                  | 内科外科整形外科<br>産婦人科脳神経外科                 | 全医師            |                                              |
| 1894 | 飛田給内科クリニック           | 182-0036 | 東京都調布市飛田給1-28-2 1階                | 042-497-6380  |                                                                                       |                    | ○                  | 内科                                    | 井上 理慧          |                                              |
| 1895 | 濱中めいようクリニック          | 182-0022 | 東京都調布市国領町7-33-1                   | 042-452-8970  | <a href="https://www.hamanaka-meiyou-cl.com/">https://www.hamanaka-meiyou-cl.com/</a> |                    | ○                  | 内科                                    | 濱中 久尚<br>佐藤 義典 |                                              |
| 1896 | ふかざわクリニック            | 182-0025 | 東京都調布市多摩川5-15-57 1F 2階            | 042-444-3170  | <a href="https://fukazawa.clinic/">https://fukazawa.clinic/</a>                       |                    | ○                  | 内科<br>小児科                             | 深澤 一郎          |                                              |
| 1897 | ふしや内科・消化器内科<br>クリニック | 182-0021 | 東京都調布市調布ヶ丘3-19-12 桑田ビル2階          | 042-485-0248  | <a href="http://www.fushiya-clinic.jp">http://www.fushiya-clinic.jp</a>               | ○                  | ○                  | 内科 消化器内科<br>内視鏡内科<br>胃腸内科 肝臓・胆のう・膵臓内科 | 伏谷 直           |                                              |
| 1898 | プライムクリニック            | 182-0004 | 東京都調布市入間町2-28-36 ウェリスオリーブ成城学園前1階  | 050-1746-1165 | <a href="https://prime-clinic.jp/">https://prime-clinic.jp/</a>                       | ○                  | ○                  | 総合診療、内科、循環器内科、ペイン緩和、小児科               | 佐藤大介、露壽仁志、田嶋美裕 |                                              |
| 1899 | 緑ヶ丘井上内科診療所           | 182-0001 | 東京都調布市緑ヶ丘2-2-1                    | 03-3309-2202  | <a href="http://www.midori-inouenaika.com">http://www.midori-inouenaika.com</a>       | ○                  | ○                  | 内科                                    | 井上明彦           |                                              |

電話や情報通信機器を用いて診療を実施する医療機関の一覧（東京都）

|      | 基本情報              |          |                     |              |                                                                                             | 事務連絡に基づく対応について     |                    |                     |                                                                   |                                                    |
|------|-------------------|----------|---------------------|--------------|---------------------------------------------------------------------------------------------|--------------------|--------------------|---------------------|-------------------------------------------------------------------|----------------------------------------------------|
|      | 施設名               | 郵便番号     | 住所（都道府県から記載）        | 電話番号         | ウェブサイトURL                                                                                   | 初診の電話等を用いた診療の実施の有無 | 再診の電話等を用いた診療の実施の有無 | 対応診療科               | 担当医師名                                                             | 対面診療が必要と判断した場合に連携する医療機関名（複数ある場合は複数、住所も併せて記載）       |
| 1900 | 村上こどもクリニック        | 182-0002 | 東京都調布市仙川町3-7-15     | 03-3300-4633 | <a href="https://www.murakamikodomo-clinic.com/">https://www.murakamikodomo-clinic.com/</a> | ○                  | ○                  | 小児科<br>内科<br>アレルギー科 | 村上 由加里                                                            | 杏林大学病院（東京都三鷹市新川6-20-2）<br>慈恵医大第3病院（東京都狛江市和泉4-11-1） |
| 1901 | 山田病院              | 182-0005 | 東京都調布市東つつじヶ丘2-36-1  | 03-3308-8281 | <a href="http://www.myclinic.ne.jp/hpyamada/pc/">http://www.myclinic.ne.jp/hpyamada/pc/</a> |                    | ○                  | 精神科                 | 藤枝 誠<br>酒井 啓子<br>田吉 伸哉<br>松島 英介<br>山口 登<br>荒木 剛<br>白石 弘巳<br>岩瀬 利郎 |                                                    |
| 1902 | 予防接種のこども診療所       | 182-0023 | 東京都調布市染地2-43-76     | 042-455-1889 | <a href="http://11sakura.jimdofree.com">http://11sakura.jimdofree.com</a>                   | ○                  | ○                  | 小児科<br>内科           | 藤本 巖                                                              |                                                    |
| 1903 | 医療法人社団梟社会<br>西田医院 | 182-0014 | 東京都調布市柴崎1-64-13     | 042-483-1350 | <a href="http://www.nishida-scl.com/">http://www.nishida-scl.com/</a>                       | ○                  | ○                  | 内科<br>小児科           | 西田 伸一                                                             |                                                    |
| 1904 | おぎもと内科クリニック       | 182-0022 | 東京都調布市国領町2-13-8     | 042-489-6658 | <a href="http://www.ogimoto-naika.com/">http://www.ogimoto-naika.com/</a>                   | ○                  | ○                  | 内科                  | 荻本剛一                                                              |                                                    |
| 1905 | しおり小児科            | 182-0024 | 東京都調布市布田2-44-1      | 042-440-7213 | <a href="http://shioriped.com">http://shioriped.com</a>                                     |                    | ○                  | 小児科                 | 根本しおり                                                             |                                                    |
| 1906 | 伊藤医院              | 182-0006 | 東京都調布市西つつじヶ丘4-19-11 | 042-483-0127 |                                                                                             |                    | ○                  | 内科<br>小児科           | 原田日女                                                              |                                                    |
| 1907 | 鵜戸西クリニック          | 182-0017 | 東京都調布市深大寺元町4-31-2   | 042-482-8658 | <a href="https://udonishi-clinic.com">https://udonishi-clinic.com</a>                       |                    | ○                  | 外科内科泌尿器科            | 宇野能子<br>宇野正志                                                      |                                                    |
| 1908 | 東つつじヶ丘さくらクリニック    | 182-0003 | 東京都調布市東つつじヶ丘3-53-11 | 03-3300-3366 | <a href="https://hopesakura.com/">https://hopesakura.com/</a>                               | ○                  | ○                  | 内科<br>小児科           | 神谷 増三                                                             | 杏林大学医学部附属病院<br>（〒181-8611 東京都三鷹市新川6丁目20-2）         |

電話や情報通信機器を用いて診療を実施する医療機関の一覧（東京都）

|      | 基本情報                      |          |                                         |              |                                                                                                                                                                                                                                                                                                           | 事務連絡に基づく対応について     |                    |                                                       |                |                                                                    |
|------|---------------------------|----------|-----------------------------------------|--------------|-----------------------------------------------------------------------------------------------------------------------------------------------------------------------------------------------------------------------------------------------------------------------------------------------------------|--------------------|--------------------|-------------------------------------------------------|----------------|--------------------------------------------------------------------|
|      | 施設名                       | 郵便番号     | 住所（都道府県から記載）                            | 電話番号         | ウェブサイトURL                                                                                                                                                                                                                                                                                                 | 初診の電話等を用いた診療の実施の有無 | 再診の電話等を用いた診療の実施の有無 | 対応診療科                                                 | 担当医師名          | 対面診療が必要と判断した場合に連携する医療機関名（複数ある場合は複数、住所も併せて記載）                       |
| 1909 | こころのクリニック調布               | 182-0024 | 東京都調布市布田2-51-6-402                      | 042-444-8527 |                                                                                                                                                                                                                                                                                                           |                    | ○                  | 精神科<br>心療内科                                           | 伊藤郁子<br>伊藤真人   |                                                                    |
| 1910 | 医友歩会<br>いしいこどもクリニック       | 182-0021 | 東京都調布市調布ヶ丘3-19-12桑田ビル1階B                | 042-483-0101 | <a href="https://ishii-kodomo.com/">https://ishii-kodomo.com/</a>                                                                                                                                                                                                                                         |                    | ○                  | 小児科                                                   | 石井 敏夫          |                                                                    |
| 1911 | 一般財団法人ひふみ会<br>まちだ丘の上病院    | 195-0064 | 東京都町田市小野路町11-1                          | 042-735-3731 | <a href="https://machida-hospital.com">https://machida-hospital.com</a>                                                                                                                                                                                                                                   | ○                  | ○                  | 内科                                                    | 米倉 修司<br>小森 将史 | 町田市民病院<br>多摩南部地域病院<br>日本医科大学多摩永山病院                                 |
| 1912 | 稲垣耳鼻咽喉科医院                 | 194-0013 | 東京都町田市原町田6-22-15                        | 042-722-3115 | <a href="http://inagaki-ent.com">http://inagaki-ent.com</a>                                                                                                                                                                                                                                               | ○                  | ○                  | 耳鼻咽喉科                                                 | 稲垣 康治          |                                                                    |
| 1913 | 入倉クリニック                   | 195-0057 | 東京都町田市真光寺2-37-11鶴川台メディカル<br>ヴィレッジ脳神経外科棟 | 042-734-3339 | <a href="http://www.myclinic.ne.jp/irikura/">http://www.myclinic.ne.jp/irikura/</a>                                                                                                                                                                                                                       | ○                  | ○                  | 脳神経外科、麻酔科、整形外科                                        | 入倉克己、入倉弘子      | 町田市民病院（町田市旭町2-15-41）、多摩南部地域病院（多摩市中沢2-1-2）、新百合ヶ丘総合病院（川崎市麻生区古沢都古255） |
| 1914 | 医療法人社団おおぞら会<br>つばさクリニック   | 194-0035 | 東京都町田市忠生3-25-11 忠生ビル302号室               | 042-794-6811 | <a href="https://www.clinic-tsubasa.com/">https://www.clinic-tsubasa.com/</a>                                                                                                                                                                                                                             | ○                  | ○                  | 精神科<br>内科<br>心療内科                                     | 鈴木 智広          |                                                                    |
| 1915 | 医療法人社団 快晴会<br>やまざき整形外科・外科 | 195-0074 | 東京都町田市山崎町2055-2 グランハート町田B-105           | 042-794-4960 | <a href="http://kaiseikai-net.or.jp/group/yamazaki-seikei">http://kaiseikai-net.or.jp/group/yamazaki-seikei</a>                                                                                                                                                                                           |                    | ○                  | 整形外科<br>皮膚科                                           | 濱田一壽<br>庭山麻里絵  |                                                                    |
| 1916 | 医療法人社団恭啓会小野<br>寺クリニック     | 194-0032 | 東京都町田市本町田4394-9本町田メディカルプラザ内             | 042-732-5605 | <a href="http://onodera.webcrow.jp/yi_liao_fa_ren_she_tuan_gong_qi_hu_i_xiao_ye_sikurinikku/yi_liao_fa_ren_she_tuangong_qi_huixiao_ye_sikurinikku.html">http://onodera.webcrow.jp/yi_liao_fa_ren_she_tuan_gong_qi_hu_i_xiao_ye_sikurinikku/yi_liao_fa_ren_she_tuangong_qi_huixiao_ye_sikurinikku.html</a> |                    | ○                  | 内科<br>泌尿器科                                            | 小野寺 恭忠         | 町田市民病院（町田市旭町2-15-41）                                               |
| 1917 | 医療法人社団 幸隆会<br>多摩丘陵病院      | 194-0297 | 東京都町田市下小山田町1491                         | 042-797-1511 | <a href="http://www.tamakyuryo.or.jp/hospital/">http://www.tamakyuryo.or.jp/hospital/</a>                                                                                                                                                                                                                 |                    | ○                  | 内科<br>外科<br>整形外科<br>眼科<br>脳神経外科<br>泌尿器科<br>皮膚科<br>婦人科 | 各医師            |                                                                    |

電話や情報通信機器を用いて診療を実施する医療機関の一覧（東京都）

|      | 基本情報                     |          |                             |              |                                                                                   | 事務連絡に基づく対応について     |                    |            |                                  |                                                         |
|------|--------------------------|----------|-----------------------------|--------------|-----------------------------------------------------------------------------------|--------------------|--------------------|------------|----------------------------------|---------------------------------------------------------|
|      | 施設名                      | 郵便番号     | 住所（都道府県から記載）                | 電話番号         | ウェブサイトURL                                                                         | 初診の電話等を用いた診療の実施の有無 | 再診の電話等を用いた診療の実施の有無 | 対応診療科      | 担当医師名                            | 対面診療が必要と判断した場合に連携する医療機関名（複数ある場合は複数、住所も併せて記載）            |
| 1918 | 医療法人社団慶泉会町田慶泉病院          | 194-0005 | 東京都町田市南町田2-1-47             | 042-795-1668 | <a href="https://www.machida-keisen.com/">https://www.machida-keisen.com/</a>     |                    | ○                  | 内科系<br>外科系 |                                  |                                                         |
| 1919 | 医療法人社団仁悠会しながわ内科・循環器クリニック | 195-0074 | 東京都町田市山崎町333-1              | 042-791-1545 | <a href="https://www.shinagawaclinic.com/">https://www.shinagawaclinic.com/</a>   | ○                  | ○                  | 内科         | 品川 弥人<br>佐藤 弥生<br>品川 直介<br>加藤 彩美 |                                                         |
| 1920 | 医療法人社団藤栄会ただお整形外科・内科      | 194-0035 | 東京都町田市忠生2-28-5              | 042-793-0201 | <a href="http://tadao-clinic.com/">http://tadao-clinic.com/</a>                   | ○                  | ○                  | 内科<br>整形外科 | 葛目 正央<br>田畑 忍                    |                                                         |
| 1921 | 医療法人社団成瀬台耳鼻咽喉科           | 194-0043 | 東京都町田市成瀬台3-8-16             | 042-729-3341 | <a href="http://narujibi.byoinnavi.jp/p/c/">http://narujibi.byoinnavi.jp/p/c/</a> | ○                  | ○                  | 耳鼻咽喉科      | 井藤博之                             |                                                         |
| 1922 | 医療法人社団はやしクリニック           | 194-0035 | 東京都町田市忠生2-28-7              | 042-793-3055 | <a href="http://hayashi-clinic.jp">http://hayashi-clinic.jp</a>                   | ○                  | ○                  | 小児科<br>内科  | 林 泉彦<br>森 俊夫                     |                                                         |
| 1923 | 氏川眼科医院                   | 194-0013 | 東京都町田市原町田6-1-1ルミネ町田7階       | 042-720-0530 | <a href="http://www.ujikawa-ganka.com/">http://www.ujikawa-ganka.com/</a>         | ○                  | ○                  | 眼科         | 氏川 真理                            |                                                         |
| 1924 | おだぎりクリニック                | 194-0021 | 東京都町田市中町1-3-1               | 042-721-1102 |                                                                                   |                    | ○                  | 循環器内科      | 小田切 重遠                           | 大和成和病院（神奈川県大和市南林間9-8-2）<br>新百合ヶ丘総合病院（神奈川県川崎市麻生区古沢都古255） |
| 1925 | 金森かとう眼科                  | 194-0015 | 東京都町田市金森東4-42-17よこたビル1階     | 042-788-4566 | <a href="https://kanamori-katoeye.com/">https://kanamori-katoeye.com/</a>         | ○                  | ○                  | 眼科         | 加藤 雄一                            |                                                         |
| 1926 | 佐藤威文前立腺クリニック             | 194-0013 | 東京都町田市原町田4-14-14 Lifixビル 2F | 042-860-6307 |                                                                                   |                    | ○                  | 泌尿器科       | 佐藤 威文                            |                                                         |

電話や情報通信機器を用いて診療を実施する医療機関の一覧（東京都）

|      | 基本情報                      |           |                                     |               |                                                                                   | 事務連絡に基づく対応について     |                    |                            |                       |                                              |
|------|---------------------------|-----------|-------------------------------------|---------------|-----------------------------------------------------------------------------------|--------------------|--------------------|----------------------------|-----------------------|----------------------------------------------|
|      | 施設名                       | 郵便番号      | 住所（都道府県から記載）                        | 電話番号          | ウェブサイトURL                                                                         | 初診の電話等を用いた診療の実施の有無 | 再診の電話等を用いた診療の実施の有無 | 対応診療科                      | 担当医師名                 | 対面診療が必要と判断した場合に連携する医療機関名（複数ある場合は複数、住所も併せて記載） |
| 1927 | 湘南内科皮膚科クリニック町田院           | 〒194-0013 | 東京都町田市原町田6-3-20 TK町田ビル5階            | 050-5576-1321 | <a href="https://sbc-medicalcare.com/">https://sbc-medicalcare.com/</a>           | ○                  | ○                  | 内科 皮膚科<br>泌尿器科（男性<br>性感染症） | 石黒 由高                 | 町田市民病院（東京都町田市旭町2-15-41）                      |
| 1928 | 整形外科・リハビリテーション科 かもめClinic | 194-0013  | 東京都町田市原町田6-17-6MHCLビル1F             | 042-850-8598  |                                                                                   |                    | ○                  | 整形外科                       | 工藤 敏治                 |                                              |
| 1929 | 園田クリニック                   | 194-0045  | 東京都町田市南成瀬1-8-2 1 成瀬メディカルビル3階        | 042-739-7322  |                                                                                   |                    | ○                  | 内科                         | 園田 和彦                 |                                              |
| 1930 | たけいち内科クリニック               | 194-0003  | 東京都町田市小川1-14-1                      | 042-850-6555  | <a href="https://takeichi-naika.jp">https://takeichi-naika.jp</a>                 |                    | ○                  | 内科                         | 武市 康敬                 |                                              |
| 1931 | たなかだて内科・呼吸器内科クリニック        | 194-8589  | 東京都町田市鶴間3-3-1 グランベリーパーク ステーションコート2F | 042-850-5027  | <a href="http://www.tanakadate-clinic.com/">http://www.tanakadate-clinic.com/</a> |                    | ○                  | 内科                         | 田中館 基親                | 南町田病院、虎の門病院、虎の門病院分院                          |
| 1932 | つくしの駅前内視鏡クリニック            | 194-0001  | 東京都町田市つくし野2-26-17-1F                | 042-850-7140  | <a href="http://tsukushino.or.jp">http://tsukushino.or.jp</a>                     | ○                  | ○                  | 消化器内科<br>内視鏡内科             | 松本 育宏                 |                                              |
| 1933 | つくし野耳鼻咽喉科                 | 194-0003  | 東京都町田市小川1-2-32                      | 042-796-8733  | <a href="http://www.tsukushino-jibika.jp">http://www.tsukushino-jibika.jp</a>     |                    | ○                  | 耳鼻咽喉科<br>小児耳鼻咽喉科<br>麻酔科    | 泰地 秀信                 |                                              |
| 1934 | 鶴川さくら病院                   | 195-0064  | 東京都町田市小野路町1632番地                    | 042-735-2621  | <a href="http://tsurukawasakura.or.jp/">tsurukawasakura.or.jp/</a>                |                    | ○                  | 精神科<br>内科                  | 富正 哉<br>有山 襄<br>橋本 智矢 |                                              |
| 1935 | 鶴川記念病院                    | 195-0054  | 東京都町田市三輪町1059番地1                    | 044-987-1311  | <a href="https://www.tsurukawakinen.or.jp">https://www.tsurukawakinen.or.jp</a>   | ○                  | ○                  | 内科<br>小児科                  | 船津 到<br>小野 朋洋         |                                              |

電話や情報通信機器を用いて診療を実施する医療機関の一覧（東京都）

|      | 基本情報            |          |                              |              |                                                                                                                           | 事務連絡に基づく対応について     |                    |                                                          |                      |                                              |
|------|-----------------|----------|------------------------------|--------------|---------------------------------------------------------------------------------------------------------------------------|--------------------|--------------------|----------------------------------------------------------|----------------------|----------------------------------------------|
|      | 施設名             | 郵便番号     | 住所（都道府県から記載）                 | 電話番号         | ウェブサイトURL                                                                                                                 | 初診の電話等を用いた診療の実施の有無 | 再診の電話等を用いた診療の実施の有無 | 対応診療科                                                    | 担当医師名                | 対面診療が必要と判断した場合に連携する医療機関名（複数ある場合は複数、住所も併せて記載） |
| 1936 | 鶴川レディースクリニック    | 195-0053 | 東京都町田市能ヶ谷3-1-5               | 042-737-7271 | <a href="http://www9.plala.or.jp/tsurukawa-lds/">http://www9.plala.or.jp/tsurukawa-lds/</a>                               | ○                  | ○                  | 内科<br>産婦人科                                               | 中林 豊                 |                                              |
| 1937 | 豊川小児科内科医院       | 194-0001 | 東京都町田市つくし野2-18-18            | 042-795-4465 | <a href="https://www.machida.tokyo.med.or.jp/?iryokikan=mina40">https://www.machida.tokyo.med.or.jp/?iryokikan=mina40</a> | ○                  | ○                  | 小児科<br>内科                                                | 豊川 達記                |                                              |
| 1938 | なるせクリニック        | 194-0046 | 東京都町田市西成瀬1-57-17             | 042-721-6686 |                                                                                                                           |                    | ○                  | 内科                                                       | 佐木 伸一郎               |                                              |
| 1939 | はやしクリニック分院      | 194-0032 | 東京都町田市本町田2943-1<br>サンライズヒル2F | 042-720-8868 | <a href="http://hayashi-clinic.jp">http://hayashi-clinic.jp</a>                                                           | ○                  | ○                  | 小児科                                                      | 中山 有子<br>山下 理恵子      |                                              |
| 1940 | 久田内科・呼吸器内科クリニック | 194-0035 | 東京都町田市忠生3-20-2               | 042-793-4114 | <a href="http://www.daiichiho.byoinnavi.jp/pc/">http://www.daiichiho.byoinnavi.jp/pc/</a>                                 | ○                  | ○                  | 一般内科<br>呼吸器内科                                            | 久田淳一郎                |                                              |
| 1941 | 雅クリニック          | 194-0013 | 東京都町田市原町田6-17-4芳村ビル1階        | 042-850-8790 | <a href="http://www.masa-clinic.com">http://www.masa-clinic.com</a>                                                       |                    | ○                  | 精神科<br>心療内科                                              | 鈴木雅博                 |                                              |
| 1942 | 増子クリニック         | 195-0053 | 東京都町田市能ヶ谷7-11-5              | 042-735-1499 | <a href="https://masuko-clinic.jimdo.com/">https://masuko-clinic.jimdo.com/</a>                                           | ○                  | ○                  | 整形外科<br>皮膚科<br>内科                                        | 増子達也<br>増子真理<br>中村文昭 |                                              |
| 1943 | 町田駅前内科クリニック     | 194-0022 | 東京都町田市森野 1-3 9-1 6 渋谷一樹ビル3F  | 042-722-7373 | <a href="https://machida-ekimaenaika.com/">https://machida-ekimaenaika.com/</a>                                           | ○                  | ○                  | 内科                                                       | 伊原 玄英                |                                              |
| 1944 | 町田市民病院          | 194-0023 | 東京都町田市旭町2-15-41              | 042-722-2230 | <a href="http://machida-city-hospital-tokyo.jp/">http://machida-city-hospital-tokyo.jp/</a>                               |                    | ○                  | 内科<br>外科<br>産婦人科<br>脳神経外科<br>脳神経内科<br>整形外科<br>精神科<br>皮膚科 | 各医師                  |                                              |



電話や情報通信機器を用いて診療を実施する医療機関の一覧（東京都）

|      | 基本情報             |          |                                      |               |                                               | 事務連絡に基づく対応について     |                    |                            |                 |                                                                                      |
|------|------------------|----------|--------------------------------------|---------------|-----------------------------------------------|--------------------|--------------------|----------------------------|-----------------|--------------------------------------------------------------------------------------|
|      | 施設名              | 郵便番号     | 住所（都道府県から記載）                         | 電話番号          | ウェブサイトURL                                     | 初診の電話等を用いた診療の実施の有無 | 再診の電話等を用いた診療の実施の有無 | 対応診療科                      | 担当医師名           | 対面診療が必要と判断した場合に連携する医療機関名（複数ある場合は複数、住所も併せて記載）                                         |
| 1945 | 南町田こどもクリニック      | 194-0004 | 東京都町田市鶴間1-19-35 南町田クリニックビル1-2階 201号室 | 042-796-2200  | http://mm-child-clinic.jp                     | ○                  | ○                  | 小児科                        | 佐藤 明弘           |                                                                                      |
| 1946 | みるるクリニック原町田      | 194-0013 | 東京都町田市原町田1-15-18                     | 042-710-5300  | http://www.miruru-clinic.com/                 |                    | ○                  | 内科<br>小児科<br>眼科            | 志野原 睦<br>志野原 知子 |                                                                                      |
| 1947 | もとはしクリニック        | 194-0021 | 東京都町田市中町2-14-10                      | 042-727-9930  |                                               |                    | ○                  | 内科                         | 本橋 久彦           |                                                                                      |
| 1948 | 薬師台おはなぼっぽクリニック   | 195-0073 | 東京都町田市薬師台1-25-12 薬師台メディカルテラス内        | 042-737-7373  | yakushidai-mt.com/yopc/index.html             | ○                  | ○                  | 内科<br>整形外科<br>精神科<br>循環器内科 | 野口 泰芳           | ・ 淵野辺総合病院<br>〒252-0206 神奈川県相模原市中央区淵野辺3丁目2-8<br>・ 町田市民病院<br>〒194-0023 東京都町田市旭町2-15-41 |
| 1949 | 山口小児クリニック        | 195-0063 | 東京都町田市野津田町1 3 6 4                    | 080-8747-2456 | http://yama-ped.jp/                           | ○                  | ○                  | 小児科<br>内科                  | 今井文英<br>山口乙丸    |                                                                                      |
| 1950 | 若山クリニック          | 195-0072 | 東京都町田市金井2-3-18                       | 042-736-7720  | http://wakayama-cl.byoinnavi.jp/pc/index.html | ○                  | ○                  | 内科、脳神経内科、小児科、皮膚科           | 若山 幸示<br>北 さくら  |                                                                                      |
| 1951 | あとう皮膚科・形成外科クリニック | 194-0037 | 東京都町田市木曽西2-17-26 木曽西医療ビル2階           | 042-791-1055  | http://www.ato-clinic.com                     |                    | ○                  | 皮膚科、形成外科                   | 阿藤 晃一           | 聖マリアンナ医科大学病院<br>(神奈川県川崎市宮前区菅生2-16-1)                                                 |
| 1952 | 和クリニック           | 195-0062 | 東京都 町田市 大蔵町 5002-2 鶴川メディカルモール1B-2    | 042-737-5055  | http://kazu-clinic.jp/                        | ○                  | ○                  | 精神科・心療内科                   | 前田佳宏            |                                                                                      |
| 1953 | 小出クリニック          | 194-0036 | 東京都町田市木曽東1-15-40                     | 042-721-2918  | http://www.tohoyk.jp/hp/koide-cl/             |                    | ○                  | 内科<br>皮膚科<br>小児科           | 小出 勝彦           | 町田病院（東京都町田市木曽東4-21-43）                                                               |

電話や情報通信機器を用いて診療を実施する医療機関の一覧（東京都）

|      | 基本情報                     |          |                                 |              |                                            | 事務連絡に基づく対応について          |                    |                                                   |                                                                      |                                                                                                                     |
|------|--------------------------|----------|---------------------------------|--------------|--------------------------------------------|-------------------------|--------------------|---------------------------------------------------|----------------------------------------------------------------------|---------------------------------------------------------------------------------------------------------------------|
|      | 施設名                      | 郵便番号     | 住所（都道府県から記載）                    | 電話番号         | ウェブサイトURL                                  | 初診の電話等を用いた診療の実施の有無      | 再診の電話等を用いた診療の実施の有無 | 対応診療科                                             | 担当医師名                                                                | 対面診療が必要と判断した場合に連携する医療機関名（複数ある場合は複数、住所も併せて記載）                                                                        |
| 1954 | アクウェルモール さくら眼科           | 184-0004 | 東京都小金井市本町6-14-28アクウェルモール2階      | 042-383-5558 | https://aquwellmall.sakuraganka.jp/        |                         | ○                  | 眼科                                                | 小林 文貴                                                                |                                                                                                                     |
| 1955 | いせだ脳神経外科 神経内科            | 184-0002 | 東京都小金井市梶野町5-11-5 パピスプラザ1階       | 042-316-1518 | http://www.isedans.jp                      |                         | ○                  | 脳神経外科                                             | 伊勢田 努力                                                               |                                                                                                                     |
| 1956 | 医療法人社団佳翔会 武蔵小金井さくら眼科     | 184-0004 | 東京都小金井市本町1-18-3-B101            | 042-383-0077 | https://sakuraganka.jp                     | ○                       | ○                  | 眼科                                                | 安田 佳守臣<br>南雲 はるか                                                     |                                                                                                                     |
| 1957 | 医療法人社団大日会 小金井太陽病院        | 184-0004 | 東京都小金井市本町1-9-17                 | 042-383-5511 | http://www.koganei-taiyo.com/              | ○<br>電話初診は現在準備中、対象は内科のみ | ○                  | 内科<br>呼吸器内科<br>循環器内科<br>消化器内科<br>外科・消化器外科<br>整形外科 | 中村讓（内科）<br>開陽子（呼吸器内科）<br>田村俊一（循環器内科）<br>三浦美貴（消化器内科）<br>野内亘（外科・消化器外科） |                                                                                                                     |
| 1958 | 医療法人社団つるかめ会 小金井つるかめクリニック | 184-0004 | 東京都小金井市本町6-14-28 プラウドタワー武蔵小金井3階 | 042-386-3757 | https://koganei.tsurukamekai.jp/index.html | ○                       | ○                  | 内科                                                | 石橋 史明<br>川上 智寛<br>小林 小の実                                             | 杏林大学医学部附属病院（東京都三鷹市新川6-20-2）<br>武蔵野赤十字病院（東京都武蔵野市境南町1-26-1）<br>多摩総合医療センター（東京都府中市武蔵台2-8-29）<br>公立昭和病院（東京都小平市花小金井8-1-1） |
| 1959 | 医療法人社団沢和会 さいとう医院         | 184-0011 | 東京都小金井市東町4-21-10                | 042-380-5510 | http://www.saito-clinic.jp                 | ○                       | ○                  | 内科循環器科消化器科                                        | 斎藤寛和                                                                 | 武蔵野赤十字病院（東京都武蔵野市境南町1-26-1）                                                                                          |
| 1960 | 菊地脳神経外科・整形外科             | 184-0011 | 東京都小金井市東町3-12-11                | 0422-31-1220 | https://neuro-kikuchi.or.jp/               |                         | ○                  | 脳神経外科<br>内科<br>整形外科                               | 菊地 隆文<br>菊地 邦夫<br>菊地 令子<br>赤崎 安晴                                     |                                                                                                                     |
| 1961 | 在宅24クリニック小金井             | 184-0013 | 東京都小金井市前原町3-16-14玉野屋コーポラス102号   | 042-316-6746 | https://www.zaitaku24.clinic/              | ○                       | ○                  | 内科<br>精神科                                         | 福岡 俊宗<br>河野 敏明                                                       |                                                                                                                     |
| 1962 | 三枝耳鼻咽喉科・小児科医院            | 184-0004 | 東京都小金井市本町5-19-32三枝ビル2階          | 042-381-8221 |                                            |                         | ○                  | 耳鼻咽喉科<br>小児科                                      | 三枝歌子                                                                 |                                                                                                                     |

電話や情報通信機器を用いて診療を実施する医療機関の一覧（東京都）

|      | 基本情報                   |          |                         |              |                                                                                   | 事務連絡に基づく対応について     |                    |                                   |                |                                                                                          |
|------|------------------------|----------|-------------------------|--------------|-----------------------------------------------------------------------------------|--------------------|--------------------|-----------------------------------|----------------|------------------------------------------------------------------------------------------|
|      | 施設名                    | 郵便番号     | 住所（都道府県から記載）            | 電話番号         | ウェブサイトURL                                                                         | 初診の電話等を用いた診療の実施の有無 | 再診の電話等を用いた診療の実施の有無 | 対応診療科                             | 担当医師名          | 対面診療が必要と判断した場合に連携する医療機関名（複数ある場合は複数、住所も併せて記載）                                             |
| 1963 | 新こがねい呼吸器内科             | 184-0011 | 東京都小金井市東町4-8-13 登川ビル 1階 | 042-389-9080 | <a href="https://shinkoganei-cl.com/">https://shinkoganei-cl.com/</a>             |                    | ○                  | 呼吸器内科<br>アレルギー科<br>内科             | 原崎 一浩          | 武蔵野赤十字病院（東京都武蔵野市境南町1-26-1）                                                               |
| 1964 | 竹田内科クリニック              | 184-0014 | 東京都小金井市貫井南町5-20-13      | 042-381-6627 | <a href="http://www.takedamc.com">http://www.takedamc.com</a>                     | ○                  | ○                  | 内科<br>循環器内科<br>腎臓内科<br>糖尿病内科      | 竹田 和義<br>竹田 溪輔 | 武蔵野赤十字病院（東京都武蔵野市境南町1-26-1）<br>多摩総合医療センター（東京都府中市武蔵台2-8-29）                                |
| 1965 | 東小金井クリニック              | 184-0002 | 東京都小金井市梶野町2-1-2         | 0422-56-8630 |                                                                                   | ○                  | ○                  | 内科・整形外科<br>アレルギー科                 | 豊田 雅樹          | 武蔵野日赤病院（東京都武蔵野市境南町1丁目26-1）<br>多摩総合医療センター（東京都府中市武蔵台2丁目8-29）                               |
| 1966 | ひらた循環器クリニック            | 184-0004 | 東京都小金井市本町5-40-3         | 042-401-6157 |                                                                                   |                    | ○                  | 内科<br>循環器内科                       | 平田 二紀代         |                                                                                          |
| 1967 | 武蔵小金井クリニック             | 184-0004 | 東京都小金井市本町5-19-33        | 042-384-0080 | <a href="http://www.kanwakai.jp">http://www.kanwakai.jp</a>                       | ○                  | ○                  | 内科                                | 金光 寛承          |                                                                                          |
| 1968 | もろほしクリニック              | 184-0003 | 東京都小金井市 緑町 1-6-53       | 042-385-3341 | <a href="http://www.morohosi-jibika.jp/">http://www.morohosi-jibika.jp/</a>       | ○                  | ○                  | 耳鼻咽喉科<br>アレルギー科<br>難聴外来           | 諸星 咲子<br>白井 杏湖 |                                                                                          |
| 1969 | 隆誠会 宮本内科医院             | 184-0012 | 東京都小金井市中町3-7-4          | 042-381-2219 | <a href="http://www.miyamoto-mc.com/">http://www.miyamoto-mc.com/</a>             | ○                  | ○                  | 内科                                | 宮本 諭           |                                                                                          |
| 1970 | 医療法人社団 玉翠会<br>喜平橋耳鼻咽喉科 | 187-0044 | 東京都小平市喜平町1-7-26         | 042-332-3387 | <a href="https://ssl.kiheij.jp">https://ssl.kiheij.jp</a>                         | ○                  | ○                  | 耳鼻咽喉科<br>アレルギー科<br>気管食道科<br>小児科内科 | 村川 哲也          | 公立昭和病院                                                                                   |
| 1971 | 医療法人社団若生会 遠藤こどもクリニック   | 187-0001 | 東京都小平市大沼町1-21-8         | 042-343-0066 | <a href="http://www.endo-kodomo-clinic.com">http://www.endo-kodomo-clinic.com</a> | ○                  | ○                  | 小児科                               | 遠藤 隆           | 1. 公立昭和病院（東京都小平市花小金井8-1-1）<br>2. 小児総合医療センター（府中市武蔵台2-8-29）<br>3. 多摩北部医療センター（東村山市青葉町1-7-1） |

電話や情報通信機器を用いて診療を実施する医療機関の一覧（東京都）

|      | 基本情報                    |          |                                   |              |                                                                                                                     | 事務連絡に基づく対応について     |                    |                                                                                    |        |                                                                                                            |
|------|-------------------------|----------|-----------------------------------|--------------|---------------------------------------------------------------------------------------------------------------------|--------------------|--------------------|------------------------------------------------------------------------------------|--------|------------------------------------------------------------------------------------------------------------|
|      | 施設名                     | 郵便番号     | 住所（都道府県から記載）                      | 電話番号         | ウェブサイトURL                                                                                                           | 初診の電話等を用いた診療の実施の有無 | 再診の電話等を用いた診療の実施の有無 | 対応診療科                                                                              | 担当医師名  | 対面診療が必要と判断した場合に連携する医療機関名（複数ある場合は複数、住所も併せて記載）                                                               |
| 1972 | 医療法人社団修恵会<br>新小平クリニック   | 187-0032 | 東京都小平市小川町2-1975-8                 | 042-312-1185 | <a href="http://www.shinkodaira-clinic.com">http://www.shinkodaira-clinic.com</a>                                   | ○                  | ○                  | 内科 心療内科<br>精神科 アルルキ-<br>科 漢方内科<br>皮膚科 糖尿病<br>内科                                    | 富田 修平  | 公立昭和病院（東京都小平市花小金井8丁目1-1）、多摩総合医療センター（東京都府中市武蔵台2丁目8-29）、多摩北部遺留センター（東京都東村山市青葉町1丁目7-1）、東大和病院（東京都東村山市南街1-13-12） |
| 1973 | 小川クリニック                 | 187-0035 | 東京都小平市小川西町3-11-1                  | 042-341-0653 | <a href="http://www.ogawa-cl.net">http://www.ogawa-cl.net</a>                                                       |                    | ○                  | 内科<br>小児科                                                                          | 小川 哲史  |                                                                                                            |
| 1974 | かく内科整形外科                | 187-0032 | 東京都小平市小川町2-1858                   | 042-345-7000 | <a href="https://kakunaika.byoinnavi.jp/">https://kakunaika.byoinnavi.jp/</a>                                       |                    | ○                  | 内科<br>整形外科                                                                         | 澤田晋    | 公立昭和病院（東京都小平市花小金井八丁目1-1）                                                                                   |
| 1975 | けぶかわ医院                  | 187-0045 | 東京都小平市学園西町二丁目15番1号<br>小平サンパークビル1階 | 042-348-1300 | <a href="http://kebukawa.jp/">http://kebukawa.jp/</a>                                                               |                    | ○                  | 内科<br>循環器内科                                                                        | 星野虎生   |                                                                                                            |
| 1976 | 公立昭和病院                  | 187-8510 | 東京都小平市花小金井八丁目1番1号                 | 042-461-0052 | <a href="http://www.kouritu-showa.jp/">http://www.kouritu-showa.jp/</a>                                             |                    | ○                  | 呼吸器内科<br>循環器内科<br>消化器内科<br>血液内科<br>糖尿病・内分泌・<br>代謝内科<br>腎臓内科<br>脳神経内科<br>心療内科<br>外科 | 再診担当医師 |                                                                                                            |
| 1977 | 国立精神・神経<br>医療研究センター     | 187-8551 | 東京都小平市小川東町4-1-1                   | 042-341-2711 | <a href="https://www.ncnp.go.jp/hospital/news/2020/697.html">https://www.ncnp.go.jp/hospital/news/2020/697.html</a> |                    | ○                  | 精神科<br>脳神経内科<br>小児神経科等                                                             | 再診担当医師 |                                                                                                            |
| 1978 | こだいら小川町内科               | 187-0032 | 東京都小平市小川町2-1317-11                | 042-341-0654 | <a href="https://kodaira-ogawa.jp">https://kodaira-ogawa.jp</a>                                                     | ○                  | ○                  | 内科<br>小児科                                                                          | 小泉史明   |                                                                                                            |
| 1979 | こだいら内科・心臓内科             | 187-0004 | 東京都小平市天神町3-12-7-2F                | 042-341-7777 | <a href="https://kodaira-naika.com/">https://kodaira-naika.com/</a>                                                 | ○                  | ○                  | 内科<br>循環器内科                                                                        | 富田 和憲  |                                                                                                            |
| 1980 | 佐々木クリニック<br>泌尿器科・小児泌尿器科 | 187-0002 | 東京都小平市花小金井8-11-9                  | 042-344-3390 | <a href="http://www.sasa-cli.com/">http://www.sasa-cli.com/</a>                                                     | ○                  | ○                  | 泌尿器科<br>小児泌尿器科                                                                     | 白柳 慶之  |                                                                                                            |

電話や情報通信機器を用いて診療を実施する医療機関の一覧（東京都）

|      | 基本情報            |           |                                        |              |                                | 事務連絡に基づく対応について     |                    |                                |                                                                    |                                                                                                  |
|------|-----------------|-----------|----------------------------------------|--------------|--------------------------------|--------------------|--------------------|--------------------------------|--------------------------------------------------------------------|--------------------------------------------------------------------------------------------------|
|      | 施設名             | 郵便番号      | 住所（都道府県から記載）                           | 電話番号         | ウェブサイトURL                      | 初診の電話等を用いた診療の実施の有無 | 再診の電話等を用いた診療の実施の有無 | 対応診療科                          | 担当医師名                                                              | 対面診療が必要と判断した場合に連携する医療機関名（複数ある場合は複数、住所も併せて記載）                                                     |
| 1981 | 鈴木町クリニック        | 187-0011  | 東京都小平市鈴木町2-865-97 2階                   | 042-401-1170 | http://suzukicho-clinic.com/   | ○                  | ○                  | 内科<br>消化器内科 外科                 | 岩瀬 尚子                                                              |                                                                                                  |
| 1982 | たかの台こどもクリニック    | 187-00025 | 東京都小平市津田町1-3-8 シティホーム鷹の台#2<br>1階       | 042-345-2525 | https://takanodai-kodomo.com/  | ○                  | ○                  | 小児科<br>アレルギー科                  | 北村 知宏                                                              | 公立昭和病院(東京都小平市花小金井8丁目1-1) 東京都立小児総合医療センター(東京都府中市武蔵台2丁目8-29)                                        |
| 1983 | 多摩済生病院          | 187-0041  | 東京都小平市美園町3-11-1                        | 042-341-1611 | http://www.tama-saisei.or.jp   |                    | ○                  | 内科<br>外科<br>整形外科<br>精神科<br>皮膚科 | 藤田 信明<br>高橋 信樹<br>中谷 親弘<br>宮野 修<br>吉野 正興<br>小林 孝寛<br>須賀 潤<br>八尋 義昭 |                                                                                                  |
| 1984 | ながしま脳神経・頭痛クリニック | 187-0044  | 東京都小平市喜平町1-7-17                        | 042-332-0232 | http://www.nagashima-clinic.jp |                    | ○                  | 脳神経外科                          | 長島 正                                                               |                                                                                                  |
| 1985 | 八木メディカルクリニック    | 187-0002  | 東京都小平市花小金井6-17-5                       | 042-460-3861 |                                | ○                  | ○                  | 内科                             | 八木知佳                                                               |                                                                                                  |
| 1986 | 矢口内科クリニック       | 187-0001  | 東京都小平市大沼町7-3-2                         | 042-349-1168 | http://www.yaguchi-naika.jp    |                    | ○                  | 内科                             | 矢口 誠                                                               |                                                                                                  |
| 1987 | 緑成会整育園          | 187-0032  | 東京都小平市小川町1-741-34                      | 042-341-3013 | info@seiikuen.jp               |                    | ○                  | 小児科                            | 山田 直人                                                              |                                                                                                  |
| 1988 | 緑成会病院           | 187-0035  | 東京都小平市小川西町2-35-1                       | 042-341-3011 | https://ryokuseikai.or.jp/     |                    | ○                  | 内科<br>整形外科<br>皮膚科              | 佐藤禎二                                                               |                                                                                                  |
| 1989 | 朝がおクリニック        | 191-0062  | 東京都日野市多摩平2-5-1クレヴィア豊田多摩平<br>の森レジデンス111 | 042-506-9304 | http://asagaocl.com            | ○                  | ○                  | 精神科・心療内科                       | 工藤 吉尚                                                              | ①日野市立病院(東京都日野市多摩平4-3-1)<br>②杏林大学医学部付属病院(東京都三鷹市新川6-20-2)<br>③東京医科大学八王子医療センター(東京都八王子市館<br>町1163番地) |

電話や情報通信機器を用いて診療を実施する医療機関の一覧（東京都）

|      | 基本情報                 |          |                           |              |                                                                                                           | 事務連絡に基づく対応について     |                    |                                 |         |                                              |
|------|----------------------|----------|---------------------------|--------------|-----------------------------------------------------------------------------------------------------------|--------------------|--------------------|---------------------------------|---------|----------------------------------------------|
|      | 施設名                  | 郵便番号     | 住所（都道府県から記載）              | 電話番号         | ウェブサイトURL                                                                                                 | 初診の電話等を用いた診療の実施の有無 | 再診の電話等を用いた診療の実施の有無 | 対応診療科                           | 担当医師名   | 対面診療が必要と判断した場合に連携する医療機関名（複数ある場合は複数、住所も併せて記載） |
| 1990 | 医療法人社団厚潤会花輪病院        | 191-0011 | 東京都日野市日野本町3丁目14-15        | 042-582-0061 | <a href="http://www.hanawa-hp.com/">http://www.hanawa-hp.com/</a>                                         | ○                  | ○                  | 内科                              | 伊藤亮治、康雄 |                                              |
| 1991 | 医療法人社団康明会康明会病院       | 191-0053 | 東京都日野市豊田2-32-1            | 042-584-5251 | <a href="https://www.komei-mc.or.jp/komeikai-hospital/">https://www.komei-mc.or.jp/komeikai-hospital/</a> |                    | ○                  | 内科<br>神経内科                      | 平井      | 日野市立病院（東京都日野市多摩平4-3-1）                       |
| 1992 | 医療法人社団 順松会 おおしろクリニック | 191-0016 | 東京都日野市神明3-6-16アメニティ明和館    | 042-589-6780 | <a href="https://ohshiro-clinic.net/">https://ohshiro-clinic.net/</a>                                     |                    | ○                  | 小児科<br>小児外科<br>内科<br>外科<br>泌尿器科 | 大城 清彦   |                                              |
| 1993 | 医療法人社団仁智会 鈴木内科クリニック  | 191-0031 | 東京都日野市高幡1009-7 TIKビル2F    | 042-599-7021 | <a href="http://www.suzukinaika-cl.com">http://www.suzukinaika-cl.com</a>                                 |                    | ○                  | 内科                              | 鈴木 隆之   | 日野市立病院（東京都日野市多摩平4-3-1）                       |
| 1994 | おやまクリニック             | 191-0031 | 東京都日野市高幡3 2 8 森久保医療モール202 | 042-592-4976 | <a href="http://www.oyama-uro.com">http://www.oyama-uro.com</a>                                           |                    | ○                  | 泌尿器科                            | 尾山博則    | 仁和会総合病院（東京都八王子市明神町4-8-1）                     |
| 1995 | 佐々木クリニック豊田           | 191-0054 | 東京都日野市東平山3-1-1            | 042-585-8063 | <a href="http://www.sasakiclinic.info">http://www.sasakiclinic.info</a>                                   |                    | ○                  | 内科                              | 佐々木 弘子  |                                              |
| 1996 | 太陽クリニック              | 191-0062 | 東京都日野市多摩平2-5-1-110        | 042-843-1686 | <a href="https://www.taiyo-cl.com">https://www.taiyo-cl.com</a>                                           |                    | ○                  | 小児科・内科                          | 舘岡 昇    |                                              |
| 1997 | 高瀬内科クリニック            | 191-0002 | 東京都日野市新町1-20-3 エスペラル1F    | 042-582-7228 | <a href="https://www.hino-takase-naika.jp/">https://www.hino-takase-naika.jp/</a>                         |                    | ○                  | 内科                              | 高瀬雅久    |                                              |
| 1998 | 中川クリニック              | 191-0041 | 東京都日野市南平7-18-11           | 042-594-0313 |                                                                                                           | ○                  | ○                  | 内科                              | 中川均     |                                              |

電話や情報通信機器を用いて診療を実施する医療機関の一覧（東京都）

|      | 基本情報                     |          |                                   |              |                                                                                   | 事務連絡に基づく対応について     |                    |               |                        |                                                   |
|------|--------------------------|----------|-----------------------------------|--------------|-----------------------------------------------------------------------------------|--------------------|--------------------|---------------|------------------------|---------------------------------------------------|
|      | 施設名                      | 郵便番号     | 住所（都道府県から記載）                      | 電話番号         | ウェブサイトURL                                                                         | 初診の電話等を用いた診療の実施の有無 | 再診の電話等を用いた診療の実施の有無 | 対応診療科         | 担当医師名                  | 対面診療が必要と判断した場合に連携する医療機関名（複数ある場合は複数、住所も併せて記載）      |
| 1999 | 麦倉眼科                     | 191-0042 | 東京都日野市程久保3-37-8                   | 042-593-9910 | <a href="http://mugikura-eye.byoinnavi.jp/">http://mugikura-eye.byoinnavi.jp/</a> |                    | ○                  | 眼科            | 麦倉 好江                  | 日野市立病院（日野市多摩平4-3-1）<br>東海大学八王子病院（八王子市石川町1838）     |
| 2000 | 百草の森ふれあいクリニック            | 191-0033 | 東京都日野市百草1042-22                   | 042-599-7068 | <a href="http://www.mogusanomori.jp/">http://www.mogusanomori.jp/</a>             |                    | ○                  | 内科<br>小児科     | 岩田 和也                  |                                                   |
| 2001 | 森久保クリニック                 | 191-0031 | 東京都日野市高幡328                       | 042-594-6778 | <a href="http://www.morikubo-clinic.jp/">http://www.morikubo-clinic.jp/</a>       |                    | ○                  | 内科<br>小児科     | 森久保雅道                  | 日野市立病院（東京都日野市多摩平4-3-1）                            |
| 2002 | 森末クリニック                  | 191-0062 | 東京都日野市多摩平1-4-19藤ビル2階              | 042-589-3030 | <a href="https://morisue-clinic.com/">https://morisue-clinic.com/</a>             | ○                  | ○                  | 内科 外科         | 森末 淳                   |                                                   |
| 2003 | リーデンス皮膚科クリニック            | 191-0031 | 東京都日野市高幡507-4リーデンススクエア高幡<br>不働117 | 042-599-5455 | <a href="http://www.leadence-hifuka.com">http://www.leadence-hifuka.com</a>       |                    | ○                  | 皮膚科           | 神谷 篤<br>神谷 玲子          |                                                   |
| 2004 | 医療法人社団幸悠会 逸見病院           | 189-0012 | 東京都東村山市荻山町三丁目26番地16               | 042-391-1903 | <a href="http://www.kouyukai1968.or.jp">http://www.kouyukai1968.or.jp</a>         |                    | ○                  | 精神科           | 各医師                    |                                                   |
| 2005 | 医療法人社団SAK さかき皮膚科・外科クリニック | 189-0013 | 東京都東村山市栄町1-4-26クメガワメディカルビル502     | 042-398-7677 | <a href="https://www.sakaki-cl.com">https://www.sakaki-cl.com</a>                 |                    | ○                  | 皮膚科           | 榑 聖樹                   | 公立昭和病院（東京都小平市花小金井8-1-1）<br>一橋病院（東京都小平市学園西町1-2-25） |
| 2006 | 医療法人社団新新会 多摩あおば病院        | 189-0002 | 東京都東村山市青葉町2-27-1                  | 042-393-2881 | <a href="http://www.sinsinkai.jp">http://www.sinsinkai.jp</a>                     |                    | ○                  | 精神科           | 富田三樹生<br>中島 直<br>他医師全員 |                                                   |
| 2007 | 医療法人社団正樹会 オーク・クリニック      | 189-0013 | 東京都東村山市栄町2-7-15                   | 042-395-1550 | 無                                                                                 |                    | ○                  | 内科<br>小児科、皮膚科 | 小川重樹                   | 多摩北部医療センター（東京都東村山市青葉町1-7-1）                       |

電話や情報通信機器を用いて診療を実施する医療機関の一覧（東京都）

|      | 基本情報                          |          |                          |              |                                  | 事務連絡に基づく対応について     |                    |                      |                                                                       |                                                                |
|------|-------------------------------|----------|--------------------------|--------------|----------------------------------|--------------------|--------------------|----------------------|-----------------------------------------------------------------------|----------------------------------------------------------------|
|      | 施設名                           | 郵便番号     | 住所（都道府県から記載）             | 電話番号         | ウェブサイトURL                        | 初診の電話等を用いた診療の実施の有無 | 再診の電話等を用いた診療の実施の有無 | 対応診療科                | 担当医師名                                                                 | 対面診療が必要と判断した場合に連携する医療機関名（複数ある場合は複数、住所も併せて記載）                   |
| 2008 | 医療法人社団誠優会東村山けやきクリニック          | 189-0024 | 東京都東村山市野口町2-4-35         | 042-409-0884 | http://keyakiclinic.com/         |                    | ○                  | 小児科、内科、外科            | 大橋 忍                                                                  | 多摩北部医療センター（東京都東村山市青葉町1-7-1）<br>東京都立小児総合医療センター（東京都府中市武蔵台2-8-29） |
| 2009 | うしき婦人科クリニック                   | 189-0014 | 東京都東村山市本町2-3-79 ミネルパビル5F | 042-390-8822 | http://www.u-clinic.jp           |                    | ○                  | 婦人科                  | 牛木信之                                                                  |                                                                |
| 2010 | 北多摩生協診療所                      | 189-0014 | 東京都東村山市本町4-2-32ドルチェ久米川1階 | 042-393-5903 | http://saito.coop/clinic/#a05    | ○                  | ○                  | 内科                   | 坂本 匡一                                                                 |                                                                |
| 2011 | 公益財団法人東京都保健医療公社<br>多摩北部医療センター | 189-8511 | 東京都東村山市青葉町一丁目7番地1        | 042-396-3811 | http://www.tamahoku-hp.jp        |                    | ○                  | 全診療科                 | 全医師                                                                   | 当院医師が電話等にて診療が可能と判断した場合のみ対応                                     |
| 2012 | 緑風荘病院                         | 189-0012 | 東京都東村山市萩山町3丁目31番地1       | 042-392-1101 | http://ryokufuusou.com/          |                    | ○                  | 内科、外科<br>整形外科<br>小児科 | 内 北村竜一 他<br>17名<br>外 玉崎良久 他<br>9名<br>整 相原大和 他<br>7名<br>小 宮嶋伸一郎<br>他3名 |                                                                |
| 2013 | 国分寺すずかけ心療クリニック                | 185-0011 | 東京都国分寺市本多2-3-3国分寺市商工会館5階 | 042-312-4406 | https://kokubunjisuzukake.jp/    |                    | ○                  | 精神科                  | 藤田 英親<br>中嶋 愛一郎<br>小石 慎子<br>斉藤 幹郎                                     |                                                                |
| 2014 | 小林内科医院                        | 185-0012 | 東京都国分寺市本町1-7-3           | 042-300-2072 | http://knaika.com                | ○                  | ○                  | 内科                   | 小林 典雄                                                                 |                                                                |
| 2015 | 中島内科クリニック                     | 185-0012 | 東京都国分寺市本町3-13-1          | 042-327-3888 | http://www.nakajima-med-cl.jp/   |                    | ○                  | 内科<br>糖尿病・内分泌<br>内科  | 中島 泰                                                                  |                                                                |
| 2016 | のむらクリニックスクエア                  | 185-0011 | 東京都国分寺市本多1-8-3           | 042-325-0087 | https://www.nomuracl-square.com/ | ○                  | ○                  | 内科・眼科                | 野村 敦宣/圭子                                                              |                                                                |



電話や情報通信機器を用いて診療を実施する医療機関の一覧（東京都）

|      | 基本情報          |          |                                       |              |                                       | 事務連絡に基づく対応について     |                    |                                |                                                            |                                              |
|------|---------------|----------|---------------------------------------|--------------|---------------------------------------|--------------------|--------------------|--------------------------------|------------------------------------------------------------|----------------------------------------------|
|      | 施設名           | 郵便番号     | 住所（都道府県から記載）                          | 電話番号         | ウェブサイトURL                             | 初診の電話等を用いた診療の実施の有無 | 再診の電話等を用いた診療の実施の有無 | 対応診療科                          | 担当医師名                                                      | 対面診療が必要と判断した場合に連携する医療機関名（複数ある場合は複数、住所も併せて記載） |
| 2017 | 武蔵国分寺公園クリニック  | 185-0023 | 東京都国分寺市西元町2-16-34 ザ・ライオンズ 武蔵国分寺公園127  | 042-320-4970 | http://ebm-clinic.com/                | ○                  | ○                  | 内科<br>小児科                      | 名郷 直樹<br>福士元春<br>五十嵐 博<br>片山 淳仁<br>進谷 憲亮<br>渡邊 彩子<br>平沼 仁美 |                                              |
| 2018 | 山口医院          | 185-0003 | 東京都国分寺市戸倉2-11-55                      | 042-322-0121 |                                       | ○                  | ○                  | 内科<br>小児科皮膚科                   | 山口 美穂                                                      |                                              |
| 2019 | くにたち南口診療所     | 186-0004 | 東京都国立市中1-16-25シャトレクインテス国立1階           | 042-577-8953 | http://www.santamairyou.com           |                    | ○                  | 内科<br>小児科<br>外科<br>泌尿器科<br>肛門科 | 浅倉 禮治<br>小島 美保                                             |                                              |
| 2020 | たにの耳鼻咽喉科      | 186-0004 | 東京都国立市中1-8-36                         | 042-571-8741 |                                       |                    | ○                  | 耳鼻咽喉科                          | 谷野徹                                                        |                                              |
| 2021 | クリニックみらい国立    | 186-0002 | 東京都国立市東1-6-9                          | 042-505-7560 | https://kunitachi.tama-mirai.com/     |                    | ○                  | 内科<br>皮膚科                      | 野川 深雪<br>渥美 令子                                             |                                              |
| 2022 | ヒバリこどもクリニック   | 186-0003 | 東京都国立市富士見台3-1-15-2F                   | 042-505-6017 | https://hibari-kodomo.net/            |                    | ○                  | 小児科                            | 青木 奈穂                                                      |                                              |
| 2023 | ひろみこどもクリニック   | 186-0004 | 東京都国立市中2-20-9                         | 042-501-0088 | https://www.hiromi-kodomo-clinic.com/ | ○                  | ○                  | 小児科                            | 七条 裕美                                                      | 東京都立小児総合医療センター（東京都府中市武蔵台2-8-29）              |
| 2024 | 松田内科クリニック     | 186-0003 | 東京都国立市富士見台4-41-1グランソシエ 国立ウエトウイング139号A | 042-573-0010 | http://matsuda-naika.clinic           | ○                  | ○                  | 内科                             | 松田 昭彦                                                      |                                              |
| 2025 | 医療法人社団杏邦会西村医院 | 197-0003 | 東京都福生市熊川927                           | 042-553-0182 |                                       |                    | ○                  | 内科<br>消化器内科<br>呼吸器内科           | 西村曜<br>西村理<br>小林英樹                                         |                                              |

電話や情報通信機器を用いて診療を実施する医療機関の一覧（東京都）

|      | 基本情報              |          |                          |              |                                          | 事務連絡に基づく対応について     |                    |                                                          |                                                                     |                                                                                                     |
|------|-------------------|----------|--------------------------|--------------|------------------------------------------|--------------------|--------------------|----------------------------------------------------------|---------------------------------------------------------------------|-----------------------------------------------------------------------------------------------------|
|      | 施設名               | 郵便番号     | 住所（都道府県から記載）             | 電話番号         | ウェブサイトURL                                | 初診の電話等を用いた診療の実施の有無 | 再診の電話等を用いた診療の実施の有無 | 対応診療科                                                    | 担当医師名                                                               | 対面診療が必要と判断した場合に連携する医療機関名（複数ある場合は複数、住所も併せて記載）                                                        |
| 2026 | 医療法人社団福朗会 津田クリニック | 197-0014 | 東京都福生市福生二宮2461           | 042-513-3656 | http://www.clinic-tsuda.jp               |                    | ○                  | 内科<br>外科<br>肛門外科                                         | 津田 倫樹                                                               |                                                                                                     |
| 2027 | 公立福生病院            | 197-8511 | 東京都福生市加美平1-6-1           | 042-551-1111 | http://www.fussahp.jp/                   |                    | ○                  | 内科<br>精神科<br>循環器内科<br>腎臓内科<br>小児科<br>外科<br>整形外科<br>脳神経外科 | 各診療科担当医師                                                            |                                                                                                     |
| 2028 | 高村内科クリニック         | 197-0011 | 東京都福生市福生1044 STハウス       | 042-530-2710 | http://www.takamuraika.com/              | ○                  | ○                  | 糖尿病内科<br>内科                                              | 高村 宏                                                                | 公立福生病院（東京都福生市加美平1-6-1）                                                                              |
| 2029 | 福生クリニック           | 197-0012 | 東京都福生市加美平3-35-13         | 042-551-2312 | http://www.kanjinkai.net/                |                    | ○                  | 内科                                                       | 玉木 一弘                                                               |                                                                                                     |
| 2030 | 石戸谷小児科            | 201-0012 | 東京都狛江市中和泉1-1-1狛江YSビル4階   | 03-3430-1070 |                                          |                    | ○                  | 小児科                                                      | 石戸谷尚子                                                               |                                                                                                     |
| 2031 | かじわらハートクリニック      | 201-0012 | 東京都狛江市中和泉5-17-27 グラウクス1階 | 03-5761-9091 | kajiwara-heart.com                       |                    | ○                  | 内科                                                       | 梶原 秀俊                                                               | 東京慈恵会医科大学附属第三病院（東京都狛江市和泉本町4-11-1）<br>杏林大学医学部付属病院（東京都三鷹市新川6-20-2）<br>東京都立多摩総合医療センター（東京都府中市武蔵台2-8-29） |
| 2032 | 東京慈恵会医科大学附属第三病院   | 201-8601 | 東京都狛江市和泉本町4丁目11番1号       | 03-3480-1151 | http://www.jikei.ac.jp/hospital/daisan/  |                    | ○                  | 全診療科                                                     | 各科担当医師                                                              | 【備考】慢性疾患を有する再診患者が対象で医師が必要と判断した場合                                                                    |
| 2033 | 東京多摩病院            | 201-0005 | 東京都狛江市岩戸南2-2-3           | 03-3489-3191 | https://tokyotama.or.jp/                 |                    | ○                  | 内科                                                       | 金子博                                                                 | 東京慈恵第三病院                                                                                            |
| 2034 | 社会医療法人財団大和会 東大和病院 | 207-0014 | 東京都東大和市南街1-13-12         | 042-562-1411 | http://www.yamatokai.or.jp/higasiyamato/ |                    | ○                  | 脳神経外科<br>呼吸器科<br>腎臓内科<br>循環器科<br>消化器科<br>外科<br>糖尿病・内分泌科  | 小林 郁夫<br>並木 義夫<br>白矢 勝子<br>加藤 隆一<br>寺井 潔<br>木庭 雄至<br>犬飼 浩一<br>下山 真実 | 社会医療法人財団大和会<br>東大和病院附属セントラルクリニック<br>（東京都東大和市南街2-3-1）                                                |

電話や情報通信機器を用いて診療を実施する医療機関の一覧（東京都）

|      | 基本情報                   |          |                             |              |                                       | 事務連絡に基づく対応について     |                    |                  |                         |                                              |
|------|------------------------|----------|-----------------------------|--------------|---------------------------------------|--------------------|--------------------|------------------|-------------------------|----------------------------------------------|
|      | 施設名                    | 郵便番号     | 住所（都道府県から記載）                | 電話番号         | ウェブサイトURL                             | 初診の電話等を用いた診療の実施の有無 | 再診の電話等を用いた診療の実施の有無 | 対応診療科            | 担当医師名                   | 対面診療が必要と判断した場合に連携する医療機関名（複数ある場合は複数、住所も併せて記載） |
| 2035 | 東大和病院附属セントラルクリニック      | 207-0014 | 東京都東大和市南街2-3-1              | 042-562-5511 | tp://www.yamatokai.or.jp/higasiyamato | ○                  | ○                  | 循環器内科            | 加藤 隆一<br>石野 光則          |                                              |
| 2036 | 医療法人社団大塚耳鼻咽喉科医院        | 204-0022 | 東京都清瀬市松山1-40-21             | 042-492-0287 | http://ootsukajibika.main.jp/         | ○                  | ○                  | 耳鼻咽喉科            | 大塚健司                    |                                              |
| 2037 | 医療法人社団順洋会 武蔵野総合クリニック   | 204-0021 | 東京都清瀬市元町1-8-30              | 042-496-7015 | http://www.6340-group.jp/clinic/      | ○                  | ○                  | 総合診療科<br>小児科     | 守山医師<br>杉井医師            |                                              |
| 2038 | 医療法人社団秀清会 清瀬ささき眼科クリニック | 204-0022 | 東京都清瀬市松山1-2-23 セントラルプラザ清瀬3階 | 042-497-8522 | http://www.kiyosesasakiganka.com/     |                    | ○                  | 眼科               | 佐々木 秀次                  |                                              |
| 2039 | 清瀬市元町しいのクリニック          | 204-0021 | 東京都清瀬市元町1-8-19 アーク清瀬1F      | 042-493-9880 | http://www.shiino-clinic.com          | ○                  | ○                  | 内科 外科<br>整形外科    | 椎野 豊                    |                                              |
| 2040 | 清瀬診療所                  | 204-0021 | 東京都清瀬市元町1-13-27             | 042-493-2727 | http://www.saito.coop                 |                    | ○                  | 内科<br>整形外科       | 各担当医                    |                                              |
| 2041 | はたの耳鼻咽喉科               | 204-0021 | 東京都清瀬市元町1丁目8番アーク清瀬3階        | 042-491-1133 | https://musashino-ent.jp              | ○                  | ○                  | 耳鼻咽喉科            | 小野 貴之                   |                                              |
| 2042 | 医療法人社団 鹿島医院            | 203-0023 | 東京都東久留米市南沢4-3-2             | 042-461-2967 |                                       |                    | ○                  | 内科<br>小児科<br>皮膚科 | 鹿島 研司<br>鹿島 正安<br>鹿島 真人 |                                              |
| 2043 | 医療法人社団好仁会 滝山病院         | 203-0033 | 東京都東久留米市滝山4-1-18            | 042-473-3311 | https://koujin-kai.jp/                | ○                  | ○                  | 内科               | 小笠原 芳宏<br>坂巻 周二         |                                              |

電話や情報通信機器を用いて診療を実施する医療機関の一覧（東京都）

|      | 基本情報                            |          |                             |              |                                                                                                     | 事務連絡に基づく対応について     |                    |                               |                          |                                              |
|------|---------------------------------|----------|-----------------------------|--------------|-----------------------------------------------------------------------------------------------------|--------------------|--------------------|-------------------------------|--------------------------|----------------------------------------------|
|      | 施設名                             | 郵便番号     | 住所（都道府県から記載）                | 電話番号         | ウェブサイトURL                                                                                           | 初診の電話等を用いた診療の実施の有無 | 再診の電話等を用いた診療の実施の有無 | 対応診療科                         | 担当医師名                    | 対面診療が必要と判断した場合に連携する医療機関名（複数ある場合は複数、住所も併せて記載） |
| 2044 | おかの内科クリニック                      | 203-0014 | 東京都東久留米市東本町6-15 平和ビル2F      | 042-477-0055 |                                                                                                     |                    | ○                  | 内科<br>呼吸器内科                   | 岡野 良                     |                                              |
| 2045 | たきぐち内科クリニック                     | 203-0032 | 東京都東久留米市前沢4-31-4            | 042-470-9118 | <a href="http://takiguchi.byoinnavi.jp/pc/">http://takiguchi.byoinnavi.jp/pc/</a>                   |                    | ○                  | 内科                            | 滝口邦彦                     |                                              |
| 2046 | 東久留米つばい眼科                       | 203-0054 | 東京都東久留米市中央町5-9-38           | 042-420-4100 | <a href="https://tsuboi-eye.com/">https://tsuboi-eye.com/</a>                                       | ○                  | ○                  | 眼科                            | 坪井 隆政                    |                                              |
| 2047 | 東久留米なごみ内科診療所                    | 203-0052 | 東京都東久留米市幸町3-11-14           | 042-470-7530 | <a href="http://www.nagomi-naika.com">http://www.nagomi-naika.com</a>                               |                    | ○                  | 内科<br>循環器内科                   | 榎本 光信<br>高世 秀仁           |                                              |
| 2048 | 富士見通り診療所                        | 203-0053 | 東京都東久留米市本町3-3-23            | 042-417-2291 | <a href="http://saito.coop/clinic/#a01">http://saito.coop/clinic/#a01</a>                           |                    | ○                  | 内科                            | 橋爪 洋一                    | 立川相互病院（東京都立川市緑町4-1）<br>複十字病院（東京都清瀬市松山3-1-24） |
| 2049 | 水野胃腸クリニック                       | 203-0053 | 東京都東久留米市本町3丁目8-19セブリオ本町3丁目A | 042-420-6527 | <a href="http://mizuno-icho.com">http://mizuno-icho.com</a>                                         | ○                  | ○                  | 内科<br>消化器内科<br>肛門内科<br>アレルギー科 | 水野 滋章<br>水野 真理<br>川島 志布子 |                                              |
| 2050 | 福山内科クリニック                       | 203-0013 | 東京都東久留米市新川町1-9-22           | 042-470-9177 |                                                                                                     | ○                  | ○                  | 内科                            | 福山 中                     |                                              |
| 2051 | 医療法人社団もかほ会<br>武蔵村山さいとうクリ<br>ニック | 208-0013 | 東京都武蔵村山市大南3-68-3            | 042-590-2266 | <a href="http://www.msaito.jp/clinic//">http://www.msaito.jp/clinic//</a>                           | ○                  | ○                  | 全科                            | 齊藤 直人<br>島 秀樹            |                                              |
| 2052 | 東京小児療育病院                        | 208-0011 | 東京都武蔵村山市学園4-10-1            | 042-561-2521 | <a href="https://www.kakufuh.com/tokyo_s/index.html">https://www.kakufuh.com/tokyo_s/index.html</a> |                    | ○                  | 小児科<br>精神科                    | 常勤医                      |                                              |

電話や情報通信機器を用いて診療を実施する医療機関の一覧（東京都）

|      | 基本情報                  |          |                                  |              |                                                                                                                           | 事務連絡に基づく対応について     |                    |                           |                                            |                                                                                |
|------|-----------------------|----------|----------------------------------|--------------|---------------------------------------------------------------------------------------------------------------------------|--------------------|--------------------|---------------------------|--------------------------------------------|--------------------------------------------------------------------------------|
|      | 施設名                   | 郵便番号     | 住所（都道府県から記載）                     | 電話番号         | ウェブサイトURL                                                                                                                 | 初診の電話等を用いた診療の実施の有無 | 再診の電話等を用いた診療の実施の有無 | 対応診療科                     | 担当医師名                                      | 対面診療が必要と判断した場合に連携する医療機関名（複数ある場合は複数、住所も併せて記載）                                   |
| 2053 | 独立行政法人国立病院機構村山医療センター  | 208-0011 | 東京都武蔵村山市学園2-37-1                 | 042-561-1221 | <a href="http://www.murayama-hosp.jp/">http://www.murayama-hosp.jp/</a>                                                   |                    | ○                  | 内科<br>外科<br>整形外科<br>リハビリ科 |                                            |                                                                                |
| 2054 | 武蔵村山病院                | 208-0022 | 東京都武蔵村山市榎1-1-5                   | 042-566-3111 | <a href="http://yamatokai.or.jp/musasimurayama/">http://yamatokai.or.jp/musasimurayama/</a>                               |                    | ○                  | 各科                        | 担当医                                        |                                                                                |
| 2055 | あいクリニック               | 206-0035 | 東京都多摩市中沢2-5-3<br>ゆいま〜る中沢A棟1階     | 042-311-2820 | <a href="https://kawakita.or.jp/aisafetynet/aiclinic-nakazawa/">https://kawakita.or.jp/aisafetynet/aiclinic-nakazawa/</a> |                    | ○                  | 内科                        | 明石 のぞみ                                     | 多摩南部地域病院（東京都多摩市中沢2-1-2）<br>日本医科大学多摩永山病院（東京都多摩市永山1-7-1）<br>町田市民病院（町田市旭町2-15-41） |
| 2056 | あべ多摩センター内科            | 201-0034 | 東京都多摩市鶴牧1-22-2 多摩メディカルビルディング2階   | 042-373-7755 | <a href="mailto:info@abetama-naika.com">info@abetama-naika.com</a>                                                        |                    | ○                  | 内科<br>循環内科                | 安部 剛                                       |                                                                                |
| 2057 | 井上内科クリニック             | 206-0034 | 東京都多摩市鶴牧2-24-12                  | 042-372-3660 | <a href="http://inoue-naikaclinic.jp">http://inoue-naikaclinic.jp</a>                                                     |                    | ○                  | 内科                        | 井上 智雄                                      |                                                                                |
| 2058 | 医療法人財団医親会多摩海上ビル診療所    | 206-0034 | 東京都多摩市鶴牧2-1-1 多摩東京海上日動ビルディング地下1階 | 042-356-2222 | <a href="https://www.tnkbclinic.com/">https://www.tnkbclinic.com/</a>                                                     |                    | ○                  | 内科                        | 木幡 義彰<br>田口 誠一郎<br>飯島 敏彦                   |                                                                                |
| 2059 | 医療法人財団共立医療会多摩みなみクリニック | 206-0025 | 東京都多摩市永山1-7-8                    | 042-311-4415 | <a href="http://tama.kyoritsu-clinic.jp/index.html">http://tama.kyoritsu-clinic.jp/index.html</a>                         |                    | ○                  | 内科                        | 濱田 隼一                                      |                                                                                |
| 2060 | 医療法人社団栄友会多摩ゆずクリニック    | 206-0033 | 東京都多摩市落合1-7-12ライティングビル6F         | 042-400-0467 | <a href="https://yuzucl.jp/">https://yuzucl.jp/</a>                                                                       | ○                  | ○                  | 老年内科                      | 安田 裕亮                                      | 医療法人社団恵仁会 府中恵仁会病院（東京都府中市住吉町5-21-1）<br>医療法人社団慈敬会 府中医王病院（東京都府中市晴見町1丁目20）         |
| 2061 | 医療法人社団めぐみ会            | 215-0033 | 東京都多摩市落合1-44-401                 | 042-311-1566 | <a href="https://www.m-seikei.com/seikei/">https://www.m-seikei.com/seikei/</a>                                           |                    | ○                  | 整形外科                      | 牧野 裕司<br>小島 崇紀<br>五味 範浩<br>佐々木 伸尚<br>中村 研太 |                                                                                |

電話や情報通信機器を用いて診療を実施する医療機関の一覧（東京都）

|      | 基本情報                     |          |                                     |              |                                                                                                   | 事務連絡に基づく対応について     |                    |                             |                 |                                                      |
|------|--------------------------|----------|-------------------------------------|--------------|---------------------------------------------------------------------------------------------------|--------------------|--------------------|-----------------------------|-----------------|------------------------------------------------------|
|      | 施設名                      | 郵便番号     | 住所（都道府県から記載）                        | 電話番号         | ウェブサイトURL                                                                                         | 初診の電話等を用いた診療の実施の有無 | 再診の電話等を用いた診療の実施の有無 | 対応診療科                       | 担当医師名           | 対面診療が必要と判断した場合に連携する医療機関名（複数ある場合は複数、住所も併せて記載）         |
| 2062 | 医療法人社団めぐみ会<br>田村クリニック2   | 206-0033 | 東京都多摩市落合1-35<br>ライオンプラザ多摩センター3階     | 042-357-3671 | <a href="https://www.tamuracl2.com/">https://www.tamuracl2.com/</a>                               |                    | ○                  | 小児科<br>皮膚科<br>耳鼻咽喉科<br>漢方内科 | HP参照            |                                                      |
| 2063 | 唐木田こどもクリニック              | 206-0035 | 東京都多摩市唐木田1-53-9 唐木田センタービル<br>2C（2階） | 042-355-8505 | <a href="http://k-kodomo.com/">http://k-kodomo.com/</a>                                           |                    | ○                  | 小児科<br>アレルギー科               | 飛田 正俊           |                                                      |
| 2064 | 桜ヶ丘記念病院                  | 206-0021 | 東京都多摩市連光寺1-1-1                      | 042-375-6311 | <a href="http://www.swfsakura.or.jp/sakuragaokahp/">http://www.swfsakura.or.jp/sakuragaokahp/</a> |                    | ○                  | 精神科                         | 岩下 覚<br>他30名    |                                                      |
| 2065 | 三矢会 武島内科クリ<br>ニック        | 206-0033 | 東京都多摩市落合3-11-3                      | 042-338-5665 | <a href="http://www.takeshima-naika-clinic.com">http://www.takeshima-naika-clinic.com</a>         | ○                  | ○                  | 内科                          | 武島英人            | 日本医科大学多摩永山病院（東京都多摩市永山1-7-1）                          |
| 2066 | 耳鼻咽喉科<br>多摩センタークリニック     | 206-0033 | 東京都多摩市落合1-9-3 セゾン・ド・大貫 4F           | 042-376-8711 | <a href="http://tamacenter.sho-jin.com/">http://tamacenter.sho-jin.com/</a>                       | ○                  | ○                  | 耳鼻科                         | 永屋 恵子           |                                                      |
| 2067 | 島田療育センター                 | 206-0036 | 東京都多摩市中沢1-31-1                      | 042-374-2071 | <a href="https://www.shimada-ryoiku.or.jp/tama/">https://www.shimada-ryoiku.or.jp/tama/</a>       | ○                  | ○                  | 小児科<br>児童精神科                | 木実谷哲史他40<br>名   |                                                      |
| 2068 | (社)慶心会 多摩永山<br>腎・内科クリニック | 206-0025 | 東京都多摩市永山1-4グリナード永山5階                | 042-311-2417 | <a href="https://www.keishinkai.or.jp/nagayama/">https://www.keishinkai.or.jp/nagayama/</a>       |                    | ○                  | 内科                          | 松川 重明<br>津金澤 浩彦 | 日本医大多摩永山病院（東京都多摩市永山1-7-1）<br>多摩南部地域病院（東京都多摩市中沢2-1-2） |
| 2069 | たかまつ耳鼻咽喉科<br>クリニック       | 206-0025 | 東京都多摩市永山1-14-12 キャスケード1 1F          | 042-371-1187 | <a href="http://takamastu.sho-jin.com/">http://takamastu.sho-jin.com/</a>                         | ○                  | ○                  | 耳鼻科                         | 高松 俊輔           |                                                      |
| 2070 | 武井小児科                    | 206-0011 | 東京都多摩市関戸2-6 9-3                     | 042-357-3030 | <a href="http://www.takei-dr.jp">http://www.takei-dr.jp</a>                                       | ○                  | ○                  | 小児科                         | 武井章人            |                                                      |

電話や情報通信機器を用いて診療を実施する医療機関の一覧（東京都）

|      | 基本情報                     |           |                                |              |                                                                                                                             | 事務連絡に基づく対応について     |                    |                 |                |                                              |
|------|--------------------------|-----------|--------------------------------|--------------|-----------------------------------------------------------------------------------------------------------------------------|--------------------|--------------------|-----------------|----------------|----------------------------------------------|
|      | 施設名                      | 郵便番号      | 住所（都道府県から記載）                   | 電話番号         | ウェブサイトURL                                                                                                                   | 初診の電話等を用いた診療の実施の有無 | 再診の電話等を用いた診療の実施の有無 | 対応診療科           | 担当医師名          | 対面診療が必要と判断した場合に連携する医療機関名（複数ある場合は複数、住所も併せて記載） |
| 2071 | 多摩センタークリニック<br>みらい       | 206-0033  | 東京都多摩市落合1-38マグレブパーキング1F        | 042-316-8570 | <a href="https://www.tama-mirai.com/">https://www.tama-mirai.com/</a>                                                       |                    | ○                  | 内科<br>皮膚科       | 藤井 仁美<br>渥美 令子 |                                              |
| 2072 | 多摩センターレディース<br>クリニック     | 206-00034 | 東京都多摩市鶴牧1-22-2 3F              | 042-375-5122 | <a href="https://www.tama-ladies.com/">https://www.tama-ladies.com/</a>                                                     |                    | ○                  | 産婦人科            | 清水 華子          |                                              |
| 2073 | 東京みみ・はな・のど<br>サージッククリニック | 206-0011  | 東京都多摩市関戸2-66                   | 042-371-3387 | <a href="https://tokyo-ent-surgi.com/">https://tokyo-ent-surgi.com/</a>                                                     | ○                  | ○                  | 耳鼻科             | 淵上 輝彦          |                                              |
| 2074 | にしだこどもクリニック              | 206-0025  | 東京都多摩市永山1-2-14フローラ永山1A         | 042-376-1001 | <a href="http://www.nishidakodomo.com">http://www.nishidakodomo.com</a>                                                     | ○                  | ○                  | 小児科<br>小児アレルギー科 | 西田 大祐<br>村田 岳哉 |                                              |
| 2075 | あいクリニック平尾                | 206-0823  | 東京都稲城市平尾3-7-4 コーシャハイム平尾1階      | 042-350-5062 | <a href="https://www.kawakita.or.jp/aisafetynet/aiclinic-hirao/">https://www.kawakita.or.jp/aisafetynet/aiclinic-hirao/</a> |                    | ○                  | 内科              | 奥村 光絵          |                                              |
| 2076 | なかお内科クリニック               | 206-0802  | 東京都稲城市東長沼3107-4<br>京王リトナード稲城3F | 042-401-5836 | <a href="https://www.nakao-naika-cl.com">https://www.nakao-naika-cl.com</a>                                                 | ○                  | ○                  | 内科<br>消化器内科     | 中尾 裕           |                                              |
| 2077 | 東長沼クリニック                 | 206-0802  | 東京都稲城市東長沼1726-16               | 042-379-4851 |                                                                                                                             | ○                  | ○                  | 内科<br>小児科       | 中島一生美          |                                              |
| 2078 | 医療法人社団天陽会 柳<br>田医院       | 205-0014  | 東京都羽村市羽東1-30-20                | 042-555-1800 | <a href="https://yanagida-clinic.or.jp/">https://yanagida-clinic.or.jp/</a>                                                 |                    | ○                  | 内科・糖尿病内科        | 柳田和弘           |                                              |
| 2079 | あきる野総合クリニック              | 197-0802  | 東京都あきる野市草花1439-9               | 042-518-2088 | <a href="https://akiruno-sogo-clinic.com">https://akiruno-sogo-clinic.com</a>                                               | ○                  | ○                  | 内科              | 小林 雅史          |                                              |

電話や情報通信機器を用いて診療を実施する医療機関の一覧（東京都）

|      | 基本情報                 |          |                   |              |                                                                                                                                                 | 事務連絡に基づく対応について     |                    |                         |                     |                                                           |
|------|----------------------|----------|-------------------|--------------|-------------------------------------------------------------------------------------------------------------------------------------------------|--------------------|--------------------|-------------------------|---------------------|-----------------------------------------------------------|
|      | 施設名                  | 郵便番号     | 住所（都道府県から記載）      | 電話番号         | ウェブサイトURL                                                                                                                                       | 初診の電話等を用いた診療の実施の有無 | 再診の電話等を用いた診療の実施の有無 | 対応診療科                   | 担当医師名               | 対面診療が必要と判断した場合に連携する医療機関名（複数ある場合は複数、住所も併せて記載）              |
| 2080 | あきるの杜きずなクリニック        | 190-0164 | 東京都あきる野市五日市149-1  | 042-596-6736 | <a href="https://kizuna-cl.com">https://kizuna-cl.com</a>                                                                                       | ○                  | ○                  | 小児科<br>内科<br>外科<br>小児外科 | 小高 哲郎               |                                                           |
| 2081 | あべクリニック              | 197-0803 | 東京都あきる野市瀬戸岡474-6  | 042-558-7730 | <a href="https://abe-cl.net">https://abe-cl.net</a>                                                                                             |                    | ○                  | 内科・外科・小児科               | 阿部英雄                |                                                           |
| 2082 | 上代継診療所               | 197-0832 | 東京都あきる野市上代継84-6   | 042-559-2241 | <a href="https://www.kakufuh.com/nishitama/index.html">https://www.kakufuh.com/nishitama/index.html</a>                                         |                    | ○                  | 小児科<br>精神科              | 常勤医                 |                                                           |
| 2083 | 公立阿伎留医療センター          | 197-0834 | 東京都あきる野市引田78-1    | 042-558-0321 | <a href="http://www.akiru-med.jp">http://www.akiru-med.jp</a>                                                                                   |                    | ○                  | 全科                      | ホームページの診療担当医と<br>おり | 当院の場合、慢性疾患等のかかりつけで再診予約患者のみが対象であり、初診は実施していない。詳細は当院ホームページ参照 |
| 2084 | なかのやUクリニック           | 197-0804 | 東京都あきる野市秋川1-7-17  | 042-550-1156 | <a href="http://www.nakanoya-clinic.com/">http://www.nakanoya-clinic.com/</a>                                                                   |                    | ○                  | 泌尿器科                    | 仲野谷 祐嗣              | 公立阿伎留医療センター（東京都あきる野市引田78-1）                               |
| 2085 | 安部医院                 | 202-0015 | 東京都西東京市保谷町3-24-2  | 042-461-0781 | <a href="https://www.ambe-clinic.com">https://www.ambe-clinic.com</a>                                                                           | ○                  | ○                  | 耳鼻咽喉科<br>小児科            | 安部 浩一<br>嶋田 真人      |                                                           |
| 2086 | 医療法人社団慈秀会石田クリニック     | 188-0001 | 東京都西東京市谷戸町1-23-13 | 042-421-9905 | <a href="http://www.ishidac.com/">http://www.ishidac.com/</a>                                                                                   | ○                  | ○                  | 内科外科胃腸科<br>肛門科          | 石田秀世                | 武蔵野徳洲会病院（東京都西東京市向台町3-5-48）                                |
| 2087 | 医療法人社団エキップ みわ内科クリニック | 202-0004 | 東京都西東京市下保谷4-12-2  | 042-438-7188 | <a href="http://www.miwaclinic.net">http://www.miwaclinic.net</a>                                                                               | ○                  | ○                  | 内科<br>脳神経内科             | 三輪隆子、三輪英人           | 西東京市発熱外来・武蔵野徳洲会病院（東京都西東京市向台町3-5-48）                       |
| 2088 | 医療法人社団齊藤小児科内科クリニック   | 202-0004 | 東京都西東京市下保谷4-2-21  | 042-421-7201 | <a href="http://www.saitoh-clinic.com/201009/page/06%20shokai/shokai.html">http://www.saitoh-clinic.com/201009/page/06%20shokai/shokai.html</a> | ○                  | ○                  | 小児科、内科                  | 齊藤喜親                |                                                           |



電話や情報通信機器を用いて診療を実施する医療機関の一覧（東京都）

|      | 基本情報                |          |                                      |              |                                                                                         | 事務連絡に基づく対応について     |                    |                                                             |              |                                                                                       |
|------|---------------------|----------|--------------------------------------|--------------|-----------------------------------------------------------------------------------------|--------------------|--------------------|-------------------------------------------------------------|--------------|---------------------------------------------------------------------------------------|
|      | 施設名                 | 郵便番号     | 住所（都道府県から記載）                         | 電話番号         | ウェブサイトURL                                                                               | 初診の電話等を用いた診療の実施の有無 | 再診の電話等を用いた診療の実施の有無 | 対応診療科                                                       | 担当医師名        | 対面診療が必要と判断した場合に連携する医療機関名（複数ある場合は複数、住所も併せて記載）                                          |
| 2089 | 医療法人社団東光会 西東京中央総合病院 | 188-0014 | 東京都西東京市芝久保町2-4-19                    | 042-464-1511 | <a href="https://www.nishitokyo-chuobyoin.jp/">https://www.nishitokyo-chuobyoin.jp/</a> |                    | ○                  | 整形外科・総合診療科・内科・循環器内科・心臓血管外科・消化器科・耳鼻咽喉科・泌尿器科・眼科・脳神経外科・皮膚科・小児科 | 各科担当医師       |                                                                                       |
| 2090 | 医療法人社団翠檜会ひがき医院      | 188-0014 | 東京都西東京市芝久保町1-11-10                   | 042-462-5521 | <a href="http://www.higaki-cl.jp">http://www.higaki-cl.jp</a>                           | ○                  | ○                  | 内科<br>小児科<br>循環器内科                                          | 檜垣有司         |                                                                                       |
| 2091 | 桑原内科クリニック           | 202-0004 | 東京都西東京市下保谷4-13-23 保谷 s t メディカルビル 2 階 | 042-421-0707 |                                                                                         |                    | ○                  | 内科                                                          | 桑原星明         |                                                                                       |
| 2092 | 浩心会なかやま内科循環器クリニック   | 188-0013 | 東京都西東京市向台町1-19-14 ノーブルハイツ向台1階        | 042-450-7710 | <a href="https://www.nakayama-clinic.org/">https://www.nakayama-clinic.org/</a>         |                    | ○                  | 内科                                                          | 中山浩二         | 佐々総合病院（東京都西東京市田無町4-24-15）<br>西東京中央総合病院（東京都西東京市芝久保町2-4-19）<br>公立昭和病院（東京都小平市花小金井八丁目1-1） |
| 2093 | こみち内科クリニック          | 188-0014 | 東京都西東京市芝久保町1-5-8ハイネス田無武番館104         | 042-450-6731 | <a href="http://www.komichi-cl.com">www.komichi-cl.com</a>                              |                    | ○                  | 内科                                                          | 大湊佳子<br>大湊政之 |                                                                                       |
| 2094 | しげみつファミリークリニック      | 188-0011 | 東京都西東京市田無町5-4-13 ハママンション第二1階         | 042-452-7411 | <a href="https://sf-cl.jp/">https://sf-cl.jp/</a>                                       | ○                  | ○                  | 内科<br>呼吸器内科                                                 | 鬼澤 重光        |                                                                                       |
| 2095 | 耳鼻咽喉科ヒロクリニック        | 188-0011 | 東京都西東京市田無町4-29-8丸保ビル4F               | 042-463-8711 | <a href="http://www.hirojibika.jp/">http://www.hirojibika.jp/</a>                       | ○                  | ○                  | 耳鼻咽喉科                                                       | 石田 博義        |                                                                                       |
| 2096 | すくすくkidsクリニック       | 188-0012 | 東京都西東京市南町5-9-17                      | 042-41-3027  | <a href="https://www.sukusukukids.tokyo/">https://www.sukusukukids.tokyo/</a>           | ○                  | ○                  | 小児科                                                         | 高田佳宜         |                                                                                       |
| 2097 | たなしこどもクリニック         | 188-0014 | 東京都西東京市芝久保町3-4-30ケルン田無1              | 042-452-7101 | <a href="http://tanashi-kids.jp">tanashi-kids.jp</a>                                    |                    | ○                  | 小児科                                                         | 唐渡 孝子        |                                                                                       |

電話や情報通信機器を用いて診療を実施する医療機関の一覧（東京都）

|      | 基本情報              |          |                                  |              |                            | 事務連絡に基づく対応について     |                    |                  |              |                                                                                                                  |
|------|-------------------|----------|----------------------------------|--------------|----------------------------|--------------------|--------------------|------------------|--------------|------------------------------------------------------------------------------------------------------------------|
|      | 施設名               | 郵便番号     | 住所（都道府県から記載）                     | 電話番号         | ウェブサイトURL                  | 初診の電話等を用いた診療の実施の有無 | 再診の電話等を用いた診療の実施の有無 | 対応診療科            | 担当医師名        | 対面診療が必要と判断した場合に連携する医療機関名（複数ある場合は複数、住所も併せて記載）                                                                     |
| 2098 | 田無耳鼻咽喉科クリニック      | 188-0012 | 東京都西東京市南町5-1-8 2階D区画             | 042-462-3387 | http://tanashi-ent.jp/     | ○                  | ○                  | 耳鼻咽喉科<br>小児耳鼻咽喉科 | 新井千昭         |                                                                                                                  |
| 2099 | つくしこどもクリニック       | 202-0012 | 東京都西東京市東町6-6-10                  | 042-439-6827 | http://tsukushi-kodomo.com | ○                  | ○                  | 小児科              | 嶋田 達也        | 武蔵野赤十字病院（東京都武蔵野市）                                                                                                |
| 2100 | 馬場医院              | 202-0015 | 東京都西東京市保谷町6-15-2                 | 042-462-9177 | https://www.baba-iin.com/  | ○                  | ○                  | 内科 小児科<br>循環器科   | 馬場 隆男        | 武蔵野徳洲会病院（東京都西東京市向台町3丁目5-48）                                                                                      |
| 2101 | はるクリニック           | 188-0001 | 東京都西東京市谷戸町3-23-1 Kフラット1階         | 042-425-1178 | https://www.haruclinic.com | ○                  | ○                  | 内科<br>小児科        | 岩崎晴美         | 武蔵野徳洲会病院（東京都西東京市）<br>公立昭和病院（東京都小平市）                                                                              |
| 2102 | ひばりが丘やまね小児科アレルギー科 | 188-0001 | 東京都西東京市谷戸町2-1-41グランドマストひばりが丘南103 | 042-469-3636 | http://h-yamane.clinic/    | ○                  | ○                  | 小児科<br>アレルギー科    | 山根慎治<br>山根理恵 |                                                                                                                  |
| 2103 | 久内医院              | 202-0013 | 東京都西東京市中町2-1-17                  | 042-421-3355 |                            |                    | ○                  | 内科               | 久内 淳         | 複十字病院（東京都清瀬市松山3-1-24）<br>佐々総合病院（東京都西東京市田無町4-24-15）<br>西東京中央総合病院（東京都西東京市芝久保町2-4-19）<br>武蔵野赤十字病院（東京都武蔵野市境南町1-26-1） |
| 2104 | 保谷内科呼吸器科クリニック     | 202-0005 | 東京都西東京市住吉町6丁目1番26号               | 042-458-7870 |                            | ○                  | ○                  | 内科               | 保谷 功         |                                                                                                                  |
| 2105 | まつばらホームクリニック      | 202-0012 | 東京都西東京市東町4-14-18 かえでビル2階B        | 042-439-1250 | http://m-hc.jp             |                    | ○                  | 内科               | 松原 清二        | 辻内科循環器歯科クリニック<br>（東京都練馬区大泉学園町8-24-25）                                                                            |
| 2106 | 武蔵野ファミリークリニック     | 202-0023 | 東京都西東京市新町1-2-20                  | 042-453-8500 |                            |                    | ○                  | 内科・神経内科          | 金子秀平・金子厚     | 武蔵野徳洲会病院（東京都西東京市向台町3-5-48）                                                                                       |

電話や情報通信機器を用いて診療を実施する医療機関の一覧（東京都）

|      | 基本情報                 |          |                       |                                        |                                                              | 事務連絡に基づく対応について     |                    |                                                |                                  |                                                   |
|------|----------------------|----------|-----------------------|----------------------------------------|--------------------------------------------------------------|--------------------|--------------------|------------------------------------------------|----------------------------------|---------------------------------------------------|
|      | 施設名                  | 郵便番号     | 住所（都道府県から記載）          | 電話番号                                   | ウェブサイトURL                                                    | 初診の電話等を用いた診療の実施の有無 | 再診の電話等を用いた診療の実施の有無 | 対応診療科                                          | 担当医師名                            | 対面診療が必要と判断した場合に連携する医療機関名（複数ある場合は複数、住所も併せて記載）      |
| 2107 | やまぐち内科眼科クリニック        | 188-0011 | 東京都西東京市田無町7-16-30     | 042-462-7578                           | http://www.tanashi-yamaguchi-iin.jp                          |                    | ○                  | 内科<br>眼科                                       | 山口康晴<br>山口靖子<br>児玉裕三             |                                                   |
| 2108 | 医療法人社団久遠会<br>高沢病院    | 190-1201 | 東京都西多摩郡瑞穂町二本木722-1    | 042-556-2311                           | http://www.takasawa-hospital.jp                              |                    | ○                  | 内科                                             | 奥井 重徳                            |                                                   |
| 2109 | 菜の花クリニック             | 190-1212 | 東京都西多摩郡瑞穂町殿ヶ谷454      | 042-557-7995                           | http://www.kanjinkai.net/                                    |                    | ○                  | 内科                                             | 宮元 周作                            |                                                   |
| 2110 | みずほクリニック             | 190-1231 | 東京都西多摩郡瑞穂町大字長岡長谷部31-1 | 042-568-0300                           |                                                              | ○                  | ○                  | 整形外科                                           | 川間 公雄                            | 福生病院（東京都福生市加美平1丁目6-1）<br>青梅総合病院（東京都青梅市東青梅4丁目16-5） |
| 2111 | 奥多摩町国民健康保険<br>奥多摩病院  | 198-0212 | 東京都西多摩郡奥多摩町氷川1111番地   | 0428-83-2145                           | http://www.town.okutama.tokyo.jp/gyose/kakuka/ka/biyouin.htm |                    | ○                  | 内科<br>整形外科                                     | 井上 大輔<br>高梨 俊洋<br>小林 史典<br>小林 俊之 |                                                   |
| 2112 | 三宅村国民健康保険<br>直営中央診療所 | 100-1101 | 東京都三宅島<br>三宅村神着937番地  | 04994-2-0016<br>ただし予約は<br>I P : 2-0159 | http://vill.miyake.tokyo.jp                                  |                    | ○                  | 内科、消化器科、循環器科、呼吸器科、小児科、外科、産婦人科、眼科、皮膚科、耳鼻咽喉科、精神科 | 水田 亮佑                            |                                                   |
